# Supplementary material for: Identification of Emergency Care–Sensitive Conditions and Characteristics of Emergency Department Utilization
Source: PubMed Central journal article supplement (PMC6686774; doi:10.1001/jamanetworkopen.2019.8642), 2019-08-07
Supplement: jamanetwopen-2-e198642-s001.pdf [file jamanetwopen-2-e198642-s001.pdf]

## Supplementary Online Content

Vashi AA, Urech T, Carr B, et al. Identification of emergency care–sensitive conditions and characteristics of emergency department utilization. *JAMA Netw Open*. 2019;2(8):e198642. doi:10.1001/jamanetworkopen.2019.8642

**eAppendix.** Included and Excluded *ICD-10-CM* Diagnosis Subcodes for Each of the 51 ECSC Groups

**eTable 1.** Characteristics of the Panelists

**eTable 2.** Most Common Conditions Among Non-ECSC Visits, 2016

This supplementary material has been provided by the authors to give readers additional information about their work.

**eAppendix.** Included and Excluded *ICD-10-CM* Diagnosis Subcodes for Each of the 51 ECSC Groups

Number of Included and Excluded *ICD-10-CM* Diagnosis Subcodes for the 51 ECSC Groups

| Condition Group                                                                 | No. of ICD-10-CM diagnosis subcodes |                       |                               |
|---------------------------------------------------------------------------------|-------------------------------------|-----------------------|-------------------------------|
|                                                                                 | Included                            | Excluded <sup>a</sup> | Excluded - Other <sup>b</sup> |
| <a href="#">Abdominal, lower back, pelvic and external genitalia injuries</a>   | 763                                 | 3                     | 1532                          |
| <a href="#">Acute Angle Closure Glaucoma</a>                                    | 4                                   | 229                   | 0                             |
| <a href="#">Acute appendicitis</a>                                              | 4                                   | 0                     | 0                             |
| <a href="#">Acute pancreatitis</a>                                              | 6                                   | 0                     | 0                             |
| <a href="#">Acute respiratory distress syndrome</a>                             | 1                                   | 0                     | 0                             |
| <a href="#">Alcohol withdrawal</a>                                              | 4                                   | 1                     | 0                             |
| <a href="#">Anaphylaxis</a>                                                     | 11                                  | 6                     | 34                            |
| <a href="#">Angina and other acute ischemic heart diseases</a>                  | 8                                   | 0                     | 0                             |
| <a href="#">Aortic aneurysm and dissection</a>                                  | 12                                  | 0                     | 0                             |
| <a href="#">Arterial embolism and thrombosis</a>                                | 12                                  | 0                     | 0                             |
| <a href="#">Asthma</a>                                                          | 15                                  | 3                     | 0                             |
| <a href="#">Cardiac arrest and severe arrhythmias</a>                           | 6                                   | 0                     | 0                             |
| <a href="#">Cerebral infarction</a>                                             | 72                                  | 0                     | 0                             |
| <a href="#">Cholecystitis and perforation of the gallbladder</a>                | 4                                   | 7                     | 0                             |
| <a href="#">Chronic Obstructive Pulmonary Disease</a>                           | 3                                   | 0                     | 0                             |
| <a href="#">Complications of cardiac and vascular prosthetic devices/grafts</a> | 95                                  | 2                     | 194                           |
| <a href="#">Complications of procedures</a>                                     | 62                                  | 10                    | 144                           |
| <a href="#">Diabetes mellitus - Acute</a>                                       | 20                                  | 0                     | 0                             |
| <a href="#">Disorders of the brain</a>                                          | 14                                  | 5                     | 0                             |
| <a href="#">Early complications of trauma</a>                                   | 18                                  | 0                     | 36                            |
| <a href="#">Ectopic pregnancy</a>                                               | 5                                   | 0                     | 0                             |
| <a href="#">Encephalitis, myelitis and encephalomyelitis</a>                    | 18                                  | 0                     | 0                             |
| <a href="#">Environmental exposures</a>                                         | 6                                   | 5                     | 22                            |
| <a href="#">Femur fracture</a>                                                  | 462                                 | 0                     | 2004                          |
| <a href="#">Gastrointestinal tract bleeding and/or perforation</a>              | 39                                  | 27                    | 0                             |

|                                                                           |     |    |      |
|---------------------------------------------------------------------------|-----|----|------|
| <a href="#">Heart failure</a>                                             | 14  | 0  | 0    |
| <a href="#">Infectious fasciitis</a>                                      | 2   | 5  | 0    |
| <a href="#">Intracranial hemorrhage</a>                                   | 34  | 1  | 0    |
| <a href="#">Intracranial injury</a>                                       | 190 | 0  | 380  |
| <a href="#">Meningitis</a>                                                | 19  | 2  | 0    |
| <a href="#">Moderate-severe burns and corrosions</a>                      | 548 | 0  | 880  |
| <a href="#">Myocardial infarction</a>                                     | 9   | 0  | 0    |
| <a href="#">Neck injuries</a>                                             | 303 | 6  | 618  |
| <a href="#">Other cardiac arrhythmia</a>                                  | 7   | 11 | 0    |
| <a href="#">Other diseases of intestine</a>                               | 3   | 6  | 0    |
| <a href="#">Other tachyarrhythmias</a>                                    | 8   | 2  | 0    |
| <a href="#">Overdose/Poisonings</a>                                       | 572 | 68 | 1280 |
| <a href="#">Paralytic ileus and intestinal obstruction without hernia</a> | 10  | 0  | 0    |
| <a href="#">Pericardial disease, endocarditis, and myocarditis</a>        | 26  | 0  | 0    |
| <a href="#">Peritonitis</a>                                               | 8   | 0  | 0    |
| <a href="#">Pneumonia</a>                                                 | 37  | 0  | 0    |
| <a href="#">Pneumothorax</a>                                              | 5   | 2  | 0    |
| <a href="#">Postpartum hemorrhage</a>                                     | 4   | 0  | 0    |
| <a href="#">Pre-eclampsia/Eclampsia</a>                                   | 18  | 0  | 0    |
| <a href="#">Pulmonary embolism</a>                                        | 6   | 0  | 0    |
| <a href="#">Respiratory failure</a>                                       | 12  | 0  | 0    |
| <a href="#">Sepsis and Systemic inflammatory response syndrome (SIRS)</a> | 35  | 5  | 0    |
| <a href="#">Septic arthritis</a>                                          | 122 | 0  | 0    |
| <a href="#">Shock</a>                                                     | 4   | 0  | 0    |
| <a href="#">Thoracic injuries</a>                                         | 391 | 9  | 800  |
| <a href="#">Volume depletion</a>                                          | 3   | 0  | 0    |

<sup>a</sup>ICD-10-CM diagnosis subcodes indicating pediatric, chronic, or subacute conditions were excluded.

<sup>b</sup>ICD-10-CM diagnosis subcodes describing subsequent encounters or sequelae were excluded. Because subsequent encounters and sequelae are identified by the character in the 7th position of the ICD-10 code (D=subsequent and S=sequela), we do not include these in the supplemental tables that list the specific inclusion and exclusion subcodes for each condition group.

## Included and Excluded ICD-10-CM Diagnosis Subcodes for Abdominal, Lower Back, Pelvic and External Genitalia Injuries Condition Group

| Included ICD-10-CM diagnosis subcodes (n=763) |                                                                                                                              | Excluded ICD-10-CM diagnosis subcodes (n=3) |                                                                      |
|-----------------------------------------------|------------------------------------------------------------------------------------------------------------------------------|---------------------------------------------|----------------------------------------------------------------------|
| Subcode                                       | Subcode description                                                                                                          | Subcode                                     | Subcode description                                                  |
| S31.000A                                      | Unspecified open wound of lower back and pelvis without penetration into retroperitoneum, initial encounter                  | S39.011A                                    | Strain of muscle, fascia and tendon of abdomen, initial encounter    |
| S31.001A                                      | Unspecified open wound of lower back and pelvis with penetration into retroperitoneum, initial encounter                     | S39.012A                                    | Strain of muscle, fascia and tendon of lower back, initial encounter |
| S31.010A                                      | Laceration without foreign body of lower back and pelvis without penetration into retroperitoneum, initial encounter         | S39.013A                                    | Strain of muscle, fascia and tendon of pelvis, initial encounter     |
| S31.011A                                      | Laceration without foreign body of lower back and pelvis with penetration into retroperitoneum, initial encounter            |                                             |                                                                      |
| S31.020A                                      | Laceration with foreign body of lower back and pelvis without penetration into retroperitoneum, initial encounter            |                                             |                                                                      |
| S31.021A                                      | Laceration with foreign body of lower back and pelvis with penetration into retroperitoneum, initial encounter               |                                             |                                                                      |
| S31.030A                                      | Puncture wound without foreign body of lower back and pelvis without penetration into retroperitoneum, initial encounter     |                                             |                                                                      |
| S31.031A                                      | Puncture wound without foreign body of lower back and pelvis with penetration into retroperitoneum, initial encounter        |                                             |                                                                      |
| S31.040A                                      | Puncture wound with foreign body of lower back and pelvis without penetration into retroperitoneum, initial encounter        |                                             |                                                                      |
| S31.041A                                      | Puncture wound with foreign body of lower back and pelvis with penetration into retroperitoneum, initial encounter           |                                             |                                                                      |
| S31.050A                                      | Open bite of lower back and pelvis without penetration into retroperitoneum, initial encounter                               |                                             |                                                                      |
| S31.051A                                      | Open bite of lower back and pelvis with penetration into retroperitoneum, initial encounter                                  |                                             |                                                                      |
| S31.100A                                      | Unspecified open wound of abdominal wall, right upper quadrant without penetration into peritoneal cavity, initial encounter |                                             |                                                                      |

|          |                                                                                                                                       |  |  |
|----------|---------------------------------------------------------------------------------------------------------------------------------------|--|--|
| S31.101A | Unspecified open wound of abdominal wall, left upper quadrant without penetration into peritoneal cavity, initial encounter           |  |  |
| S31.102A | Unspecified open wound of abdominal wall, epigastric region without penetration into peritoneal cavity, initial encounter             |  |  |
| S31.103A | Unspecified open wound of abdominal wall, right lower quadrant without penetration into peritoneal cavity, initial encounter          |  |  |
| S31.104A | Unspecified open wound of abdominal wall, left lower quadrant without penetration into peritoneal cavity, initial encounter           |  |  |
| S31.105A | Unspecified open wound of abdominal wall, periumbilic region without penetration into peritoneal cavity, initial encounter            |  |  |
| S31.109A | Unspecified open wound of abdominal wall, unspecified quadrant without penetration into peritoneal cavity, initial encounter          |  |  |
| S31.110A | Laceration without foreign body of abdominal wall, right upper quadrant without penetration into peritoneal cavity, initial encounter |  |  |
| S31.111A | Laceration without foreign body of abdominal wall, left upper quadrant without penetration into peritoneal cavity, initial encounter  |  |  |
| S31.112A | Laceration without foreign body of abdominal wall, epigastric region without penetration into peritoneal cavity, initial encounter    |  |  |
| S31.113A | Laceration without foreign body of abdominal wall, right lower quadrant without penetration into peritoneal cavity, initial encounter |  |  |
| S31.114A | Laceration without foreign body of abdominal wall, left lower quadrant without penetration into peritoneal cavity, initial encounter  |  |  |
| S31.115A | Laceration without foreign body of abdominal wall, periumbilic region without penetration into peritoneal cavity, initial encounter   |  |  |
| S31.119A | Laceration without foreign body of abdominal wall, unspecified quadrant without penetration into peritoneal cavity, initial encounter |  |  |

|          |                                                                                                                                           |  |  |
|----------|-------------------------------------------------------------------------------------------------------------------------------------------|--|--|
| S31.120A | Laceration of abdominal wall with foreign body, right upper quadrant without penetration into peritoneal cavity, initial encounter        |  |  |
| S31.121A | Laceration of abdominal wall with foreign body, left upper quadrant without penetration into peritoneal cavity, initial encounter         |  |  |
| S31.122A | Laceration of abdominal wall with foreign body, epigastric region without penetration into peritoneal cavity, initial encounter           |  |  |
| S31.123A | Laceration of abdominal wall with foreign body, right lower quadrant without penetration into peritoneal cavity, initial encounter        |  |  |
| S31.124A | Laceration of abdominal wall with foreign body, left lower quadrant without penetration into peritoneal cavity, initial encounter         |  |  |
| S31.125A | Laceration of abdominal wall with foreign body, periumbilic region without penetration into peritoneal cavity, initial encounter          |  |  |
| S31.129A | Laceration of abdominal wall with foreign body, unspecified quadrant without penetration into peritoneal cavity, initial encounter        |  |  |
| S31.130A | Puncture wound of abdominal wall without foreign body, right upper quadrant without penetration into peritoneal cavity, initial encounter |  |  |
| S31.131A | Puncture wound of abdominal wall without foreign body, left upper quadrant without penetration into peritoneal cavity, initial encounter  |  |  |
| S31.132A | Puncture wound of abdominal wall without foreign body, epigastric region without penetration into peritoneal cavity, initial encounter    |  |  |
| S31.133A | Puncture wound of abdominal wall without foreign body, right lower quadrant without penetration into peritoneal cavity, initial encounter |  |  |
| S31.134A | Puncture wound of abdominal wall without foreign body, left lower quadrant without penetration into peritoneal cavity, initial encounter  |  |  |
| S31.135A | Puncture wound of abdominal wall without foreign body, periumbilic region without penetration into peritoneal cavity, initial encounter   |  |  |

|          |                                                                                                                                           |  |  |
|----------|-------------------------------------------------------------------------------------------------------------------------------------------|--|--|
| S31.139A | Puncture wound of abdominal wall without foreign body, unspecified quadrant without penetration into peritoneal cavity, initial encounter |  |  |
| S31.140A | Puncture wound of abdominal wall with foreign body, right upper quadrant without penetration into peritoneal cavity, initial encounter    |  |  |
| S31.141A | Puncture wound of abdominal wall with foreign body, left upper quadrant without penetration into peritoneal cavity, initial encounter     |  |  |
| S31.142A | Puncture wound of abdominal wall with foreign body, epigastric region without penetration into peritoneal cavity, initial encounter       |  |  |
| S31.143A | Puncture wound of abdominal wall with foreign body, right lower quadrant without penetration into peritoneal cavity, initial encounter    |  |  |
| S31.144A | Puncture wound of abdominal wall with foreign body, left lower quadrant without penetration into peritoneal cavity, initial encounter     |  |  |
| S31.145A | Puncture wound of abdominal wall with foreign body, periumbilic region without penetration into peritoneal cavity, initial encounter      |  |  |
| S31.149A | Puncture wound of abdominal wall with foreign body, unspecified quadrant without penetration into peritoneal cavity, initial encounter    |  |  |
| S31.150A | Open bite of abdominal wall, right upper quadrant without penetration into peritoneal cavity, initial encounter                           |  |  |
| S31.151A | Open bite of abdominal wall, left upper quadrant without penetration into peritoneal cavity, initial encounter                            |  |  |
| S31.152A | Open bite of abdominal wall, epigastric region without penetration into peritoneal cavity, initial encounter                              |  |  |
| S31.153A | Open bite of abdominal wall, right lower quadrant without penetration into peritoneal cavity, initial encounter                           |  |  |
| S31.154A | Open bite of abdominal wall, left lower quadrant without penetration into peritoneal cavity, initial encounter                            |  |  |
| S31.155A | Open bite of abdominal wall, periumbilic region without penetration into peritoneal cavity, initial encounter                             |  |  |

|          |                                                                                                                 |  |  |
|----------|-----------------------------------------------------------------------------------------------------------------|--|--|
| S31.159A | Open bite of abdominal wall, unspecified quadrant without penetration into peritoneal cavity, initial encounter |  |  |
| S31.20XA | Unspecified open wound of penis, initial encounter                                                              |  |  |
| S31.21XA | Laceration without foreign body of penis, initial encounter                                                     |  |  |
| S31.22XA | Laceration with foreign body of penis, initial encounter                                                        |  |  |
| S31.23XA | Puncture wound without foreign body of penis, initial encounter                                                 |  |  |
| S31.24XA | Puncture wound with foreign body of penis, initial encounter                                                    |  |  |
| S31.25XA | Open bite of penis, initial encounter                                                                           |  |  |
| S31.30XA | Unspecified open wound of scrotum and testes, initial encounter                                                 |  |  |
| S31.31XA | Laceration without foreign body of scrotum and testes, initial encounter                                        |  |  |
| S31.32XA | Laceration with foreign body of scrotum and testes, initial encounter                                           |  |  |
| S31.33XA | Puncture wound without foreign body of scrotum and testes, initial encounter                                    |  |  |
| S31.34XA | Puncture wound with foreign body of scrotum and testes, initial encounter                                       |  |  |
| S31.35XA | Open bite of scrotum and testes, initial encounter                                                              |  |  |
| S31.40XA | Unspecified open wound of vagina and vulva, initial encounter                                                   |  |  |
| S31.41XA | Laceration without foreign body of vagina and vulva, initial encounter                                          |  |  |
| S31.42XA | Laceration with foreign body of vagina and vulva, initial encounter                                             |  |  |
| S31.43XA | Puncture wound without foreign body of vagina and vulva, initial encounter                                      |  |  |
| S31.44XA | Puncture wound with foreign body of vagina and vulva, initial encounter                                         |  |  |
| S31.45XA | Open bite of vagina and vulva, initial encounter                                                                |  |  |
| S31.501A | Unspecified open wound of unspecified external genital organs, male, initial encounter                          |  |  |
| S31.502A | Unspecified open wound of unspecified external genital organs, female, initial encounter                        |  |  |
| S31.511A | Laceration without foreign body of unspecified external genital organs, male, initial encounter                 |  |  |



|          |                                                                                                                           |  |  |
|----------|---------------------------------------------------------------------------------------------------------------------------|--|--|
| S31.512A | Laceration without foreign body of unspecified external genital organs, female, initial encounter                         |  |  |
| S31.521A | Laceration with foreign body of unspecified external genital organs, male, initial encounter                              |  |  |
| S31.522A | Laceration with foreign body of unspecified external genital organs, female, initial encounter                            |  |  |
| S31.531A | Puncture wound without foreign body of unspecified external genital organs, male, initial encounter                       |  |  |
| S31.532A | Puncture wound without foreign body of unspecified external genital organs, female, initial encounter                     |  |  |
| S31.541A | Puncture wound with foreign body of unspecified external genital organs, male, initial encounter                          |  |  |
| S31.542A | Puncture wound with foreign body of unspecified external genital organs, female, initial encounter                        |  |  |
| S31.551A | Open bite of unspecified external genital organs, male, initial encounter                                                 |  |  |
| S31.552A | Open bite of unspecified external genital organs, female, initial encounter                                               |  |  |
| S31.600A | Unspecified open wound of abdominal wall, right upper quadrant with penetration into peritoneal cavity, initial encounter |  |  |
| S31.601A | Unspecified open wound of abdominal wall, left upper quadrant with penetration into peritoneal cavity, initial encounter  |  |  |
| S31.602A | Unspecified open wound of abdominal wall, epigastric region with penetration into peritoneal cavity, initial encounter    |  |  |
| S31.603A | Unspecified open wound of abdominal wall, right lower quadrant with penetration into peritoneal cavity, initial encounter |  |  |
| S31.604A | Unspecified open wound of abdominal wall, left lower quadrant with penetration into peritoneal cavity, initial encounter  |  |  |
| S31.605A | Unspecified open wound of abdominal wall, periumbilic region with penetration into peritoneal cavity, initial encounter   |  |  |
| S31.609A | Unspecified open wound of abdominal wall, unspecified quadrant with penetration into peritoneal cavity, initial encounter |  |  |

|          |                                                                                                                                    |  |  |
|----------|------------------------------------------------------------------------------------------------------------------------------------|--|--|
| S31.610A | Laceration without foreign body of abdominal wall, right upper quadrant with penetration into peritoneal cavity, initial encounter |  |  |
| S31.611A | Laceration without foreign body of abdominal wall, left upper quadrant with penetration into peritoneal cavity, initial encounter  |  |  |
| S31.612A | Laceration without foreign body of abdominal wall, epigastric region with penetration into peritoneal cavity, initial encounter    |  |  |
| S31.613A | Laceration without foreign body of abdominal wall, right lower quadrant with penetration into peritoneal cavity, initial encounter |  |  |
| S31.614A | Laceration without foreign body of abdominal wall, left lower quadrant with penetration into peritoneal cavity, initial encounter  |  |  |
| S31.615A | Laceration without foreign body of abdominal wall, periumbilic region with penetration into peritoneal cavity, initial encounter   |  |  |
| S31.619A | Laceration without foreign body of abdominal wall, unspecified quadrant with penetration into peritoneal cavity, initial encounter |  |  |
| S31.620A | Laceration with foreign body of abdominal wall, right upper quadrant with penetration into peritoneal cavity, initial encounter    |  |  |
| S31.621A | Laceration with foreign body of abdominal wall, left upper quadrant with penetration into peritoneal cavity, initial encounter     |  |  |
| S31.622A | Laceration with foreign body of abdominal wall, epigastric region with penetration into peritoneal cavity, initial encounter       |  |  |
| S31.623A | Laceration with foreign body of abdominal wall, right lower quadrant with penetration into peritoneal cavity, initial encounter    |  |  |
| S31.624A | Laceration with foreign body of abdominal wall, left lower quadrant with penetration into peritoneal cavity, initial encounter     |  |  |
| S31.625A | Laceration with foreign body of abdominal wall, periumbilic region with penetration into peritoneal cavity, initial encounter      |  |  |

|          |                                                                                                                                        |  |  |
|----------|----------------------------------------------------------------------------------------------------------------------------------------|--|--|
| S31.629A | Laceration with foreign body of abdominal wall, unspecified quadrant with penetration into peritoneal cavity, initial encounter        |  |  |
| S31.630A | Puncture wound without foreign body of abdominal wall, right upper quadrant with penetration into peritoneal cavity, initial encounter |  |  |
| S31.631A | Puncture wound without foreign body of abdominal wall, left upper quadrant with penetration into peritoneal cavity, initial encounter  |  |  |
| S31.632A | Puncture wound without foreign body of abdominal wall, epigastric region with penetration into peritoneal cavity, initial encounter    |  |  |
| S31.633A | Puncture wound without foreign body of abdominal wall, right lower quadrant with penetration into peritoneal cavity, initial encounter |  |  |
| S31.634A | Puncture wound without foreign body of abdominal wall, left lower quadrant with penetration into peritoneal cavity, initial encounter  |  |  |
| S31.635A | Puncture wound without foreign body of abdominal wall, periumbilic region with penetration into peritoneal cavity, initial encounter   |  |  |
| S31.639A | Puncture wound without foreign body of abdominal wall, unspecified quadrant with penetration into peritoneal cavity, initial encounter |  |  |
| S31.640A | Puncture wound with foreign body of abdominal wall, right upper quadrant with penetration into peritoneal cavity, initial encounter    |  |  |
| S31.641A | Puncture wound with foreign body of abdominal wall, left upper quadrant with penetration into peritoneal cavity, initial encounter     |  |  |
| S31.642A | Puncture wound with foreign body of abdominal wall, epigastric region with penetration into peritoneal cavity, initial encounter       |  |  |
| S31.643A | Puncture wound with foreign body of abdominal wall, right lower quadrant with penetration into peritoneal cavity, initial encounter    |  |  |
| S31.644A | Puncture wound with foreign body of abdominal wall, left lower quadrant with penetration into peritoneal cavity, initial encounter     |  |  |

|          |                                                                                                                                     |  |  |
|----------|-------------------------------------------------------------------------------------------------------------------------------------|--|--|
| S31.645A | Puncture wound with foreign body of abdominal wall, periumbilic region with penetration into peritoneal cavity, initial encounter   |  |  |
| S31.649A | Puncture wound with foreign body of abdominal wall, unspecified quadrant with penetration into peritoneal cavity, initial encounter |  |  |
| S31.650A | Open bite of abdominal wall, right upper quadrant with penetration into peritoneal cavity, initial encounter                        |  |  |
| S31.651A | Open bite of abdominal wall, left upper quadrant with penetration into peritoneal cavity, initial encounter                         |  |  |
| S31.652A | Open bite of abdominal wall, epigastric region with penetration into peritoneal cavity, initial encounter                           |  |  |
| S31.653A | Open bite of abdominal wall, right lower quadrant with penetration into peritoneal cavity, initial encounter                        |  |  |
| S31.654A | Open bite of abdominal wall, left lower quadrant with penetration into peritoneal cavity, initial encounter                         |  |  |
| S31.655A | Open bite of abdominal wall, periumbilic region with penetration into peritoneal cavity, initial encounter                          |  |  |
| S31.659A | Open bite of abdominal wall, unspecified quadrant with penetration into peritoneal cavity, initial encounter                        |  |  |
| S31.801A | Laceration without foreign body of unspecified buttock, initial encounter                                                           |  |  |
| S31.802A | Laceration with foreign body of unspecified buttock, initial encounter                                                              |  |  |
| S31.803A | Puncture wound without foreign body of unspecified buttock, initial encounter                                                       |  |  |
| S31.804A | Puncture wound with foreign body of unspecified buttock, initial encounter                                                          |  |  |
| S31.805A | Open bite of unspecified buttock, initial encounter                                                                                 |  |  |
| S31.809A | Unspecified open wound of unspecified buttock, initial encounter                                                                    |  |  |
| S31.811A | Laceration without foreign body of right buttock, initial encounter                                                                 |  |  |
| S31.812A | Laceration with foreign body of right buttock, initial encounter                                                                    |  |  |
| S31.813A | Puncture wound without foreign body of right buttock, initial encounter                                                             |  |  |

|          |                                                                                                  |  |  |
|----------|--------------------------------------------------------------------------------------------------|--|--|
| S31.814A | Puncture wound with foreign body of right buttock, initial encounter                             |  |  |
| S31.815A | Open bite of right buttock, initial encounter                                                    |  |  |
| S31.819A | Unspecified open wound of right buttock, initial encounter                                       |  |  |
| S31.821A | Laceration without foreign body of left buttock, initial encounter                               |  |  |
| S31.822A | Laceration with foreign body of left buttock, initial encounter                                  |  |  |
| S31.823A | Puncture wound without foreign body of left buttock, initial encounter                           |  |  |
| S31.824A | Puncture wound with foreign body of left buttock, initial encounter                              |  |  |
| S31.825A | Open bite of left buttock, initial encounter                                                     |  |  |
| S31.829A | Unspecified open wound of left buttock, initial encounter                                        |  |  |
| S31.831A | Laceration without foreign body of anus, initial encounter                                       |  |  |
| S31.832A | Laceration with foreign body of anus, initial encounter                                          |  |  |
| S31.833A | Puncture wound without foreign body of anus, initial encounter                                   |  |  |
| S31.834A | Puncture wound with foreign body of anus, initial encounter                                      |  |  |
| S31.835A | Open bite of anus, initial encounter                                                             |  |  |
| S31.839A | Unspecified open wound of anus, initial encounter                                                |  |  |
| S32.000A | Wedge compression fracture of unspecified lumbar vertebra, initial encounter for closed fracture |  |  |
| S32.000B | Wedge compression fracture of unspecified lumbar vertebra, initial encounter for open fracture   |  |  |
| S32.001A | Stable burst fracture of unspecified lumbar vertebra, initial encounter for closed fracture      |  |  |
| S32.001B | Stable burst fracture of unspecified lumbar vertebra, initial encounter for open fracture        |  |  |
| S32.002A | Unstable burst fracture of unspecified lumbar vertebra, initial encounter for closed fracture    |  |  |
| S32.002B | Unstable burst fracture of unspecified lumbar vertebra, initial encounter for open fracture      |  |  |
| S32.008A | Other fracture of unspecified lumbar vertebra, initial encounter for closed fracture             |  |  |
| S32.008B | Other fracture of unspecified lumbar vertebra, initial encounter for open fracture               |  |  |

|          |                                                                                             |  |  |
|----------|---------------------------------------------------------------------------------------------|--|--|
| S32.009A | Unspecified fracture of unspecified lumbar vertebra, initial encounter for closed fracture  |  |  |
| S32.009B | Unspecified fracture of unspecified lumbar vertebra, initial encounter for open fracture    |  |  |
| S32.010A | Wedge compression fracture of first lumbar vertebra, initial encounter for closed fracture  |  |  |
| S32.010B | Wedge compression fracture of first lumbar vertebra, initial encounter for open fracture    |  |  |
| S32.011A | Stable burst fracture of first lumbar vertebra, initial encounter for closed fracture       |  |  |
| S32.011B | Stable burst fracture of first lumbar vertebra, initial encounter for open fracture         |  |  |
| S32.012A | Unstable burst fracture of first lumbar vertebra, initial encounter for closed fracture     |  |  |
| S32.012B | Unstable burst fracture of first lumbar vertebra, initial encounter for open fracture       |  |  |
| S32.018A | Other fracture of first lumbar vertebra, initial encounter for closed fracture              |  |  |
| S32.018B | Other fracture of first lumbar vertebra, initial encounter for open fracture                |  |  |
| S32.019A | Unspecified fracture of first lumbar vertebra, initial encounter for closed fracture        |  |  |
| S32.019B | Unspecified fracture of first lumbar vertebra, initial encounter for open fracture          |  |  |
| S32.020A | Wedge compression fracture of second lumbar vertebra, initial encounter for closed fracture |  |  |
| S32.020B | Wedge compression fracture of second lumbar vertebra, initial encounter for open fracture   |  |  |
| S32.021A | Stable burst fracture of second lumbar vertebra, initial encounter for closed fracture      |  |  |
| S32.021B | Stable burst fracture of second lumbar vertebra, initial encounter for open fracture        |  |  |
| S32.022A | Unstable burst fracture of second lumbar vertebra, initial encounter for closed fracture    |  |  |
| S32.022B | Unstable burst fracture of second lumbar vertebra, initial encounter for open fracture      |  |  |
| S32.028A | Other fracture of second lumbar vertebra, initial encounter for closed fracture             |  |  |

|          |                                                                                             |  |  |
|----------|---------------------------------------------------------------------------------------------|--|--|
| S32.028B | Other fracture of second lumbar vertebra, initial encounter for open fracture               |  |  |
| S32.029A | Unspecified fracture of second lumbar vertebra, initial encounter for closed fracture       |  |  |
| S32.029B | Unspecified fracture of second lumbar vertebra, initial encounter for open fracture         |  |  |
| S32.030A | Wedge compression fracture of third lumbar vertebra, initial encounter for closed fracture  |  |  |
| S32.030B | Wedge compression fracture of third lumbar vertebra, initial encounter for open fracture    |  |  |
| S32.031A | Stable burst fracture of third lumbar vertebra, initial encounter for closed fracture       |  |  |
| S32.031B | Stable burst fracture of third lumbar vertebra, initial encounter for open fracture         |  |  |
| S32.032A | Unstable burst fracture of third lumbar vertebra, initial encounter for closed fracture     |  |  |
| S32.032B | Unstable burst fracture of third lumbar vertebra, initial encounter for open fracture       |  |  |
| S32.038A | Other fracture of third lumbar vertebra, initial encounter for closed fracture              |  |  |
| S32.038B | Other fracture of third lumbar vertebra, initial encounter for open fracture                |  |  |
| S32.039A | Unspecified fracture of third lumbar vertebra, initial encounter for closed fracture        |  |  |
| S32.039B | Unspecified fracture of third lumbar vertebra, initial encounter for open fracture          |  |  |
| S32.040A | Wedge compression fracture of fourth lumbar vertebra, initial encounter for closed fracture |  |  |
| S32.040B | Wedge compression fracture of fourth lumbar vertebra, initial encounter for open fracture   |  |  |
| S32.041A | Stable burst fracture of fourth lumbar vertebra, initial encounter for closed fracture      |  |  |
| S32.041B | Stable burst fracture of fourth lumbar vertebra, initial encounter for open fracture        |  |  |
| S32.042A | Unstable burst fracture of fourth lumbar vertebra, initial encounter for closed fracture    |  |  |
| S32.042B | Unstable burst fracture of fourth lumbar vertebra, initial encounter for open fracture      |  |  |

|          |                                                                                            |  |  |
|----------|--------------------------------------------------------------------------------------------|--|--|
| S32.048A | Other fracture of fourth lumbar vertebra, initial encounter for closed fracture            |  |  |
| S32.048B | Other fracture of fourth lumbar vertebra, initial encounter for open fracture              |  |  |
| S32.049A | Unspecified fracture of fourth lumbar vertebra, initial encounter for closed fracture      |  |  |
| S32.049B | Unspecified fracture of fourth lumbar vertebra, initial encounter for open fracture        |  |  |
| S32.050A | Wedge compression fracture of fifth lumbar vertebra, initial encounter for closed fracture |  |  |
| S32.050B | Wedge compression fracture of fifth lumbar vertebra, initial encounter for open fracture   |  |  |
| S32.051A | Stable burst fracture of fifth lumbar vertebra, initial encounter for closed fracture      |  |  |
| S32.051B | Stable burst fracture of fifth lumbar vertebra, initial encounter for open fracture        |  |  |
| S32.052A | Unstable burst fracture of fifth lumbar vertebra, initial encounter for closed fracture    |  |  |
| S32.052B | Unstable burst fracture of fifth lumbar vertebra, initial encounter for open fracture      |  |  |
| S32.058A | Other fracture of fifth lumbar vertebra, initial encounter for closed fracture             |  |  |
| S32.058B | Other fracture of fifth lumbar vertebra, initial encounter for open fracture               |  |  |
| S32.059A | Unspecified fracture of fifth lumbar vertebra, initial encounter for closed fracture       |  |  |
| S32.059B | Unspecified fracture of fifth lumbar vertebra, initial encounter for open fracture         |  |  |
| S32.10XA | Unspecified fracture of sacrum, initial encounter for closed fracture                      |  |  |
| S32.10XB | Unspecified fracture of sacrum, initial encounter for open fracture                        |  |  |
| S32.110A | Nondisplaced Zone I fracture of sacrum, initial encounter for closed fracture              |  |  |
| S32.110B | Nondisplaced Zone I fracture of sacrum, initial encounter for open fracture                |  |  |
| S32.111A | Minimally displaced Zone I fracture of sacrum, initial encounter for closed fracture       |  |  |



|          |                                                                                        |  |  |
|----------|----------------------------------------------------------------------------------------|--|--|
| S32.111B | Minimally displaced Zone I fracture of sacrum, initial encounter for open fracture     |  |  |
| S32.112A | Severely displaced Zone I fracture of sacrum, initial encounter for closed fracture    |  |  |
| S32.112B | Severely displaced Zone I fracture of sacrum, initial encounter for open fracture      |  |  |
| S32.119A | Unspecified Zone I fracture of sacrum, initial encounter for closed fracture           |  |  |
| S32.119B | Unspecified Zone I fracture of sacrum, initial encounter for open fracture             |  |  |
| S32.120A | Nondisplaced Zone II fracture of sacrum, initial encounter for closed fracture         |  |  |
| S32.120B | Nondisplaced Zone II fracture of sacrum, initial encounter for open fracture           |  |  |
| S32.121A | Minimally displaced Zone II fracture of sacrum, initial encounter for closed fracture  |  |  |
| S32.121B | Minimally displaced Zone II fracture of sacrum, initial encounter for open fracture    |  |  |
| S32.122A | Severely displaced Zone II fracture of sacrum, initial encounter for closed fracture   |  |  |
| S32.122B | Severely displaced Zone II fracture of sacrum, initial encounter for open fracture     |  |  |
| S32.129A | Unspecified Zone II fracture of sacrum, initial encounter for closed fracture          |  |  |
| S32.129B | Unspecified Zone II fracture of sacrum, initial encounter for open fracture            |  |  |
| S32.130A | Nondisplaced Zone III fracture of sacrum, initial encounter for closed fracture        |  |  |
| S32.130B | Nondisplaced Zone III fracture of sacrum, initial encounter for open fracture          |  |  |
| S32.131A | Minimally displaced Zone III fracture of sacrum, initial encounter for closed fracture |  |  |
| S32.131B | Minimally displaced Zone III fracture of sacrum, initial encounter for open fracture   |  |  |
| S32.132A | Severely displaced Zone III fracture of sacrum, initial encounter for closed fracture  |  |  |
| S32.132B | Severely displaced Zone III fracture of sacrum, initial encounter for open fracture    |  |  |

|          |                                                                                  |  |  |
|----------|----------------------------------------------------------------------------------|--|--|
| S32.139A | Unspecified Zone III fracture of sacrum, initial encounter for closed fracture   |  |  |
| S32.139B | Unspecified Zone III fracture of sacrum, initial encounter for open fracture     |  |  |
| S32.14XA | Type 1 fracture of sacrum, initial encounter for closed fracture                 |  |  |
| S32.14XB | Type 1 fracture of sacrum, initial encounter for open fracture                   |  |  |
| S32.15XA | Type 2 fracture of sacrum, initial encounter for closed fracture                 |  |  |
| S32.15XB | Type 2 fracture of sacrum, initial encounter for open fracture                   |  |  |
| S32.16XA | Type 3 fracture of sacrum, initial encounter for closed fracture                 |  |  |
| S32.16XB | Type 3 fracture of sacrum, initial encounter for open fracture                   |  |  |
| S32.17XA | Type 4 fracture of sacrum, initial encounter for closed fracture                 |  |  |
| S32.17XB | Type 4 fracture of sacrum, initial encounter for open fracture                   |  |  |
| S32.19XA | Other fracture of sacrum, initial encounter for closed fracture                  |  |  |
| S32.19XB | Other fracture of sacrum, initial encounter for open fracture                    |  |  |
| S32.2XXA | Fracture of coccyx, initial encounter for closed fracture                        |  |  |
| S32.2XXB | Fracture of coccyx, initial encounter for open fracture                          |  |  |
| S32.301A | Unspecified fracture of right ilium, initial encounter for closed fracture       |  |  |
| S32.301B | Unspecified fracture of right ilium, initial encounter for open fracture         |  |  |
| S32.302A | Unspecified fracture of left ilium, initial encounter for closed fracture        |  |  |
| S32.302B | Unspecified fracture of left ilium, initial encounter for open fracture          |  |  |
| S32.309A | Unspecified fracture of unspecified ilium, initial encounter for closed fracture |  |  |
| S32.309B | Unspecified fracture of unspecified ilium, initial encounter for open fracture   |  |  |

|          |                                                                                            |  |  |
|----------|--------------------------------------------------------------------------------------------|--|--|
| S32.311A | Displaced avulsion fracture of right ilium, initial encounter for closed fracture          |  |  |
| S32.311B | Displaced avulsion fracture of right ilium, initial encounter for open fracture            |  |  |
| S32.312A | Displaced avulsion fracture of left ilium, initial encounter for closed fracture           |  |  |
| S32.312B | Displaced avulsion fracture of left ilium, initial encounter for open fracture             |  |  |
| S32.313A | Displaced avulsion fracture of unspecified ilium, initial encounter for closed fracture    |  |  |
| S32.313B | Displaced avulsion fracture of unspecified ilium, initial encounter for open fracture      |  |  |
| S32.314A | Nondisplaced avulsion fracture of right ilium, initial encounter for closed fracture       |  |  |
| S32.314B | Nondisplaced avulsion fracture of right ilium, initial encounter for open fracture         |  |  |
| S32.315A | Nondisplaced avulsion fracture of left ilium, initial encounter for closed fracture        |  |  |
| S32.315B | Nondisplaced avulsion fracture of left ilium, initial encounter for open fracture          |  |  |
| S32.316A | Nondisplaced avulsion fracture of unspecified ilium, initial encounter for closed fracture |  |  |
| S32.316B | Nondisplaced avulsion fracture of unspecified ilium, initial encounter for open fracture   |  |  |
| S32.391A | Other fracture of right ilium, initial encounter for closed fracture                       |  |  |
| S32.391B | Other fracture of right ilium, initial encounter for open fracture                         |  |  |
| S32.392A | Other fracture of left ilium, initial encounter for closed fracture                        |  |  |
| S32.392B | Other fracture of left ilium, initial encounter for open fracture                          |  |  |
| S32.399A | Other fracture of unspecified ilium, initial encounter for closed fracture                 |  |  |
| S32.399B | Other fracture of unspecified ilium, initial encounter for open fracture                   |  |  |
| S32.401A | Unspecified fracture of right acetabulum, initial encounter for closed fracture            |  |  |

|          |                                                                                                         |  |  |
|----------|---------------------------------------------------------------------------------------------------------|--|--|
| S32.401B | Unspecified fracture of right acetabulum, initial encounter for open fracture                           |  |  |
| S32.402A | Unspecified fracture of left acetabulum, initial encounter for closed fracture                          |  |  |
| S32.402B | Unspecified fracture of left acetabulum, initial encounter for open fracture                            |  |  |
| S32.409A | Unspecified fracture of unspecified acetabulum, initial encounter for closed fracture                   |  |  |
| S32.409B | Unspecified fracture of unspecified acetabulum, initial encounter for open fracture                     |  |  |
| S32.411A | Displaced fracture of anterior wall of right acetabulum, initial encounter for closed fracture          |  |  |
| S32.411B | Displaced fracture of anterior wall of right acetabulum, initial encounter for open fracture            |  |  |
| S32.412A | Displaced fracture of anterior wall of left acetabulum, initial encounter for closed fracture           |  |  |
| S32.412B | Displaced fracture of anterior wall of left acetabulum, initial encounter for open fracture             |  |  |
| S32.413A | Displaced fracture of anterior wall of unspecified acetabulum, initial encounter for closed fracture    |  |  |
| S32.413B | Displaced fracture of anterior wall of unspecified acetabulum, initial encounter for open fracture      |  |  |
| S32.414A | Nondisplaced fracture of anterior wall of right acetabulum, initial encounter for closed fracture       |  |  |
| S32.414B | Nondisplaced fracture of anterior wall of right acetabulum, initial encounter for open fracture         |  |  |
| S32.415A | Nondisplaced fracture of anterior wall of left acetabulum, initial encounter for closed fracture        |  |  |
| S32.415B | Nondisplaced fracture of anterior wall of left acetabulum, initial encounter for open fracture          |  |  |
| S32.416A | Nondisplaced fracture of anterior wall of unspecified acetabulum, initial encounter for closed fracture |  |  |
| S32.416B | Nondisplaced fracture of anterior wall of unspecified acetabulum, initial encounter for open fracture   |  |  |
| S32.421A | Displaced fracture of posterior wall of right acetabulum, initial encounter for closed fracture         |  |  |
| S32.421B | Displaced fracture of posterior wall of right acetabulum, initial encounter for open fracture           |  |  |

|          |                                                                                                                    |  |  |
|----------|--------------------------------------------------------------------------------------------------------------------|--|--|
| S32.422A | Displaced fracture of posterior wall of left acetabulum, initial encounter for closed fracture                     |  |  |
| S32.422B | Displaced fracture of posterior wall of left acetabulum, initial encounter for open fracture                       |  |  |
| S32.423A | Displaced fracture of posterior wall of unspecified acetabulum, initial encounter for closed fracture              |  |  |
| S32.423B | Displaced fracture of posterior wall of unspecified acetabulum, initial encounter for open fracture                |  |  |
| S32.424A | Nondisplaced fracture of posterior wall of right acetabulum, initial encounter for closed fracture                 |  |  |
| S32.424B | Nondisplaced fracture of posterior wall of right acetabulum, initial encounter for open fracture                   |  |  |
| S32.425A | Nondisplaced fracture of posterior wall of left acetabulum, initial encounter for closed fracture                  |  |  |
| S32.425B | Nondisplaced fracture of posterior wall of left acetabulum, initial encounter for open fracture                    |  |  |
| S32.426A | Nondisplaced fracture of posterior wall of unspecified acetabulum, initial encounter for closed fracture           |  |  |
| S32.426B | Nondisplaced fracture of posterior wall of unspecified acetabulum, initial encounter for open fracture             |  |  |
| S32.431A | Displaced fracture of anterior column [iliopubic] of right acetabulum, initial encounter for closed fracture       |  |  |
| S32.431B | Displaced fracture of anterior column [iliopubic] of right acetabulum, initial encounter for open fracture         |  |  |
| S32.432A | Displaced fracture of anterior column [iliopubic] of left acetabulum, initial encounter for closed fracture        |  |  |
| S32.432B | Displaced fracture of anterior column [iliopubic] of left acetabulum, initial encounter for open fracture          |  |  |
| S32.433A | Displaced fracture of anterior column [iliopubic] of unspecified acetabulum, initial encounter for closed fracture |  |  |
| S32.433B | Displaced fracture of anterior column [iliopubic] of unspecified acetabulum, initial encounter for open fracture   |  |  |
| S32.434A | Nondisplaced fracture of anterior column [iliopubic] of right acetabulum, initial encounter for closed fracture    |  |  |
| S32.434B | Nondisplaced fracture of anterior column [iliopubic] of right acetabulum, initial encounter for open fracture      |  |  |

|          |                                                                                                                          |  |  |
|----------|--------------------------------------------------------------------------------------------------------------------------|--|--|
| S32.435A | Nondisplaced fracture of anterior column [iliopubic] of left acetabulum, initial encounter for closed fracture           |  |  |
| S32.435B | Nondisplaced fracture of anterior column [iliopubic] of left acetabulum, initial encounter for open fracture             |  |  |
| S32.436A | Nondisplaced fracture of anterior column [iliopubic] of unspecified acetabulum, initial encounter for closed fracture    |  |  |
| S32.436B | Nondisplaced fracture of anterior column [iliopubic] of unspecified acetabulum, initial encounter for open fracture      |  |  |
| S32.441A | Displaced fracture of posterior column [ilioischial] of right acetabulum, initial encounter for closed fracture          |  |  |
| S32.441B | Displaced fracture of posterior column [ilioischial] of right acetabulum, initial encounter for open fracture            |  |  |
| S32.442A | Displaced fracture of posterior column [ilioischial] of left acetabulum, initial encounter for closed fracture           |  |  |
| S32.442B | Displaced fracture of posterior column [ilioischial] of left acetabulum, initial encounter for open fracture             |  |  |
| S32.443A | Displaced fracture of posterior column [ilioischial] of unspecified acetabulum, initial encounter for closed fracture    |  |  |
| S32.443B | Displaced fracture of posterior column [ilioischial] of unspecified acetabulum, initial encounter for open fracture      |  |  |
| S32.444A | Nondisplaced fracture of posterior column [ilioischial] of right acetabulum, initial encounter for closed fracture       |  |  |
| S32.444B | Nondisplaced fracture of posterior column [ilioischial] of right acetabulum, initial encounter for open fracture         |  |  |
| S32.445A | Nondisplaced fracture of posterior column [ilioischial] of left acetabulum, initial encounter for closed fracture        |  |  |
| S32.445B | Nondisplaced fracture of posterior column [ilioischial] of left acetabulum, initial encounter for open fracture          |  |  |
| S32.446A | Nondisplaced fracture of posterior column [ilioischial] of unspecified acetabulum, initial encounter for closed fracture |  |  |

|          |                                                                                                                        |  |  |
|----------|------------------------------------------------------------------------------------------------------------------------|--|--|
| S32.446B | Nondisplaced fracture of posterior column [ilioischial] of unspecified acetabulum, initial encounter for open fracture |  |  |
| S32.451A | Displaced transverse fracture of right acetabulum, initial encounter for closed fracture                               |  |  |
| S32.451B | Displaced transverse fracture of right acetabulum, initial encounter for open fracture                                 |  |  |
| S32.452A | Displaced transverse fracture of left acetabulum, initial encounter for closed fracture                                |  |  |
| S32.452B | Displaced transverse fracture of left acetabulum, initial encounter for open fracture                                  |  |  |
| S32.453A | Displaced transverse fracture of unspecified acetabulum, initial encounter for closed fracture                         |  |  |
| S32.453B | Displaced transverse fracture of unspecified acetabulum, initial encounter for open fracture                           |  |  |
| S32.454A | Nondisplaced transverse fracture of right acetabulum, initial encounter for closed fracture                            |  |  |
| S32.454B | Nondisplaced transverse fracture of right acetabulum, initial encounter for open fracture                              |  |  |
| S32.455A | Nondisplaced transverse fracture of left acetabulum, initial encounter for closed fracture                             |  |  |
| S32.455B | Nondisplaced transverse fracture of left acetabulum, initial encounter for open fracture                               |  |  |
| S32.456A | Nondisplaced transverse fracture of unspecified acetabulum, initial encounter for closed fracture                      |  |  |
| S32.456B | Nondisplaced transverse fracture of unspecified acetabulum, initial encounter for open fracture                        |  |  |
| S32.461A | Displaced associated transverse-posterior fracture of right acetabulum, initial encounter for closed fracture          |  |  |
| S32.461B | Displaced associated transverse-posterior fracture of right acetabulum, initial encounter for open fracture            |  |  |
| S32.462A | Displaced associated transverse-posterior fracture of left acetabulum, initial encounter for closed fracture           |  |  |
| S32.462B | Displaced associated transverse-posterior fracture of left acetabulum, initial encounter for open fracture             |  |  |
| S32.463A | Displaced associated transverse-posterior fracture of unspecified acetabulum, initial encounter for closed fracture    |  |  |

|          |                                                                                                                        |  |  |
|----------|------------------------------------------------------------------------------------------------------------------------|--|--|
| S32.463B | Displaced associated transverse-posterior fracture of unspecified acetabulum, initial encounter for open fracture      |  |  |
| S32.464A | Nondisplaced associated transverse-posterior fracture of right acetabulum, initial encounter for closed fracture       |  |  |
| S32.464B | Nondisplaced associated transverse-posterior fracture of right acetabulum, initial encounter for open fracture         |  |  |
| S32.465A | Nondisplaced associated transverse-posterior fracture of left acetabulum, initial encounter for closed fracture        |  |  |
| S32.465B | Nondisplaced associated transverse-posterior fracture of left acetabulum, initial encounter for open fracture          |  |  |
| S32.466A | Nondisplaced associated transverse-posterior fracture of unspecified acetabulum, initial encounter for closed fracture |  |  |
| S32.466B | Nondisplaced associated transverse-posterior fracture of unspecified acetabulum, initial encounter for open fracture   |  |  |
| S32.471A | Displaced fracture of medial wall of right acetabulum, initial encounter for closed fracture                           |  |  |
| S32.471B | Displaced fracture of medial wall of right acetabulum, initial encounter for open fracture                             |  |  |
| S32.472A | Displaced fracture of medial wall of left acetabulum, initial encounter for closed fracture                            |  |  |
| S32.472B | Displaced fracture of medial wall of left acetabulum, initial encounter for open fracture                              |  |  |
| S32.473A | Displaced fracture of medial wall of unspecified acetabulum, initial encounter for closed fracture                     |  |  |
| S32.473B | Displaced fracture of medial wall of unspecified acetabulum, initial encounter for open fracture                       |  |  |
| S32.474A | Nondisplaced fracture of medial wall of right acetabulum, initial encounter for closed fracture                        |  |  |
| S32.474B | Nondisplaced fracture of medial wall of right acetabulum, initial encounter for open fracture                          |  |  |
| S32.475A | Nondisplaced fracture of medial wall of left acetabulum, initial encounter for closed fracture                         |  |  |
| S32.475B | Nondisplaced fracture of medial wall of left acetabulum, initial encounter for open fracture                           |  |  |
| S32.476A | Nondisplaced fracture of medial wall of unspecified acetabulum, initial encounter for closed fracture                  |  |  |



|          |                                                                                                     |  |  |
|----------|-----------------------------------------------------------------------------------------------------|--|--|
| S32.476B | Nondisplaced fracture of medial wall of unspecified acetabulum, initial encounter for open fracture |  |  |
| S32.481A | Displaced dome fracture of right acetabulum, initial encounter for closed fracture                  |  |  |
| S32.481B | Displaced dome fracture of right acetabulum, initial encounter for open fracture                    |  |  |
| S32.482A | Displaced dome fracture of left acetabulum, initial encounter for closed fracture                   |  |  |
| S32.482B | Displaced dome fracture of left acetabulum, initial encounter for open fracture                     |  |  |
| S32.483A | Displaced dome fracture of unspecified acetabulum, initial encounter for closed fracture            |  |  |
| S32.483B | Displaced dome fracture of unspecified acetabulum, initial encounter for open fracture              |  |  |
| S32.484A | Nondisplaced dome fracture of right acetabulum, initial encounter for closed fracture               |  |  |
| S32.484B | Nondisplaced dome fracture of right acetabulum, initial encounter for open fracture                 |  |  |
| S32.485A | Nondisplaced dome fracture of left acetabulum, initial encounter for closed fracture                |  |  |
| S32.485B | Nondisplaced dome fracture of left acetabulum, initial encounter for open fracture                  |  |  |
| S32.486A | Nondisplaced dome fracture of unspecified acetabulum, initial encounter for closed fracture         |  |  |
| S32.486B | Nondisplaced dome fracture of unspecified acetabulum, initial encounter for open fracture           |  |  |
| S32.491A | Other specified fracture of right acetabulum, initial encounter for closed fracture                 |  |  |
| S32.491B | Other specified fracture of right acetabulum, initial encounter for open fracture                   |  |  |
| S32.492A | Other specified fracture of left acetabulum, initial encounter for closed fracture                  |  |  |
| S32.492B | Other specified fracture of left acetabulum, initial encounter for open fracture                    |  |  |
| S32.499A | Other specified fracture of unspecified acetabulum, initial encounter for closed fracture           |  |  |
| S32.499B | Other specified fracture of unspecified acetabulum, initial encounter for open fracture             |  |  |

|          |                                                                                      |  |  |
|----------|--------------------------------------------------------------------------------------|--|--|
| S32.501A | Unspecified fracture of right pubis, initial encounter for closed fracture           |  |  |
| S32.501B | Unspecified fracture of right pubis, initial encounter for open fracture             |  |  |
| S32.502A | Unspecified fracture of left pubis, initial encounter for closed fracture            |  |  |
| S32.502B | Unspecified fracture of left pubis, initial encounter for open fracture              |  |  |
| S32.509A | Unspecified fracture of unspecified pubis, initial encounter for closed fracture     |  |  |
| S32.509B | Unspecified fracture of unspecified pubis, initial encounter for open fracture       |  |  |
| S32.511A | Fracture of superior rim of right pubis, initial encounter for closed fracture       |  |  |
| S32.511B | Fracture of superior rim of right pubis, initial encounter for open fracture         |  |  |
| S32.512A | Fracture of superior rim of left pubis, initial encounter for closed fracture        |  |  |
| S32.512B | Fracture of superior rim of left pubis, initial encounter for open fracture          |  |  |
| S32.519A | Fracture of superior rim of unspecified pubis, initial encounter for closed fracture |  |  |
| S32.519B | Fracture of superior rim of unspecified pubis, initial encounter for open fracture   |  |  |
| S32.591A | Other specified fracture of right pubis, initial encounter for closed fracture       |  |  |
| S32.591B | Other specified fracture of right pubis, initial encounter for open fracture         |  |  |
| S32.592A | Other specified fracture of left pubis, initial encounter for closed fracture        |  |  |
| S32.592B | Other specified fracture of left pubis, initial encounter for open fracture          |  |  |
| S32.599A | Other specified fracture of unspecified pubis, initial encounter for closed fracture |  |  |
| S32.599B | Other specified fracture of unspecified pubis, initial encounter for open fracture   |  |  |
| S32.601A | Unspecified fracture of right ischium, initial encounter for closed fracture         |  |  |

|          |                                                                                              |  |  |
|----------|----------------------------------------------------------------------------------------------|--|--|
| S32.601B | Unspecified fracture of right ischium, initial encounter for open fracture                   |  |  |
| S32.602A | Unspecified fracture of left ischium, initial encounter for closed fracture                  |  |  |
| S32.602B | Unspecified fracture of left ischium, initial encounter for open fracture                    |  |  |
| S32.609A | Unspecified fracture of unspecified ischium, initial encounter for closed fracture           |  |  |
| S32.609B | Unspecified fracture of unspecified ischium, initial encounter for open fracture             |  |  |
| S32.611A | Displaced avulsion fracture of right ischium, initial encounter for closed fracture          |  |  |
| S32.611B | Displaced avulsion fracture of right ischium, initial encounter for open fracture            |  |  |
| S32.612A | Displaced avulsion fracture of left ischium, initial encounter for closed fracture           |  |  |
| S32.612B | Displaced avulsion fracture of left ischium, initial encounter for open fracture             |  |  |
| S32.613A | Displaced avulsion fracture of unspecified ischium, initial encounter for closed fracture    |  |  |
| S32.613B | Displaced avulsion fracture of unspecified ischium, initial encounter for open fracture      |  |  |
| S32.614A | Nondisplaced avulsion fracture of right ischium, initial encounter for closed fracture       |  |  |
| S32.614B | Nondisplaced avulsion fracture of right ischium, initial encounter for open fracture         |  |  |
| S32.615A | Nondisplaced avulsion fracture of left ischium, initial encounter for closed fracture        |  |  |
| S32.615B | Nondisplaced avulsion fracture of left ischium, initial encounter for open fracture          |  |  |
| S32.616A | Nondisplaced avulsion fracture of unspecified ischium, initial encounter for closed fracture |  |  |
| S32.616B | Nondisplaced avulsion fracture of unspecified ischium, initial encounter for open fracture   |  |  |
| S32.691A | Other specified fracture of right ischium, initial encounter for closed fracture             |  |  |
| S32.691B | Other specified fracture of right ischium, initial encounter for open fracture               |  |  |

|          |                                                                                                             |  |  |
|----------|-------------------------------------------------------------------------------------------------------------|--|--|
| S32.692A | Other specified fracture of left ischium, initial encounter for closed fracture                             |  |  |
| S32.692B | Other specified fracture of left ischium, initial encounter for open fracture                               |  |  |
| S32.699A | Other specified fracture of unspecified ischium, initial encounter for closed fracture                      |  |  |
| S32.699B | Other specified fracture of unspecified ischium, initial encounter for open fracture                        |  |  |
| S32.810A | Multiple fractures of pelvis with stable disruption of pelvic ring, initial encounter for closed fracture   |  |  |
| S32.810B | Multiple fractures of pelvis with stable disruption of pelvic ring, initial encounter for open fracture     |  |  |
| S32.811A | Multiple fractures of pelvis with unstable disruption of pelvic ring, initial encounter for closed fracture |  |  |
| S32.811B | Multiple fractures of pelvis with unstable disruption of pelvic ring, initial encounter for open fracture   |  |  |
| S32.82XA | Multiple fractures of pelvis without disruption of pelvic ring, initial encounter for closed fracture       |  |  |
| S32.82XB | Multiple fractures of pelvis without disruption of pelvic ring, initial encounter for open fracture         |  |  |
| S32.89XA | Fracture of other parts of pelvis, initial encounter for closed fracture                                    |  |  |
| S32.89XB | Fracture of other parts of pelvis, initial encounter for open fracture                                      |  |  |
| S32.9XXA | Fracture of unspecified parts of lumbosacral spine and pelvis, initial encounter for closed fracture        |  |  |
| S32.9XXB | Fracture of unspecified parts of lumbosacral spine and pelvis, initial encounter for open fracture          |  |  |
| S34.01XA | Concussion and edema of lumbar spinal cord, initial encounter                                               |  |  |
| S34.02XA | Concussion and edema of sacral spinal cord, initial encounter                                               |  |  |
| S34.101A | Unspecified injury to L1 level of lumbar spinal cord, initial encounter                                     |  |  |
| S34.102A | Unspecified injury to L2 level of lumbar spinal cord, initial encounter                                     |  |  |
| S34.103A | Unspecified injury to L3 level of lumbar spinal cord, initial encounter                                     |  |  |

|          |                                                                                  |  |  |
|----------|----------------------------------------------------------------------------------|--|--|
| S34.104A | Unspecified injury to L4 level of lumbar spinal cord, initial encounter          |  |  |
| S34.105A | Unspecified injury to L5 level of lumbar spinal cord, initial encounter          |  |  |
| S34.109A | Unspecified injury to unspecified level of lumbar spinal cord, initial encounter |  |  |
| S34.111A | Complete lesion of L1 level of lumbar spinal cord, initial encounter             |  |  |
| S34.112A | Complete lesion of L2 level of lumbar spinal cord, initial encounter             |  |  |
| S34.113A | Complete lesion of L3 level of lumbar spinal cord, initial encounter             |  |  |
| S34.114A | Complete lesion of L4 level of lumbar spinal cord, initial encounter             |  |  |
| S34.115A | Complete lesion of L5 level of lumbar spinal cord, initial encounter             |  |  |
| S34.119A | Complete lesion of unspecified level of lumbar spinal cord, initial encounter    |  |  |
| S34.121A | Incomplete lesion of L1 level of lumbar spinal cord, initial encounter           |  |  |
| S34.122A | Incomplete lesion of L2 level of lumbar spinal cord, initial encounter           |  |  |
| S34.123A | Incomplete lesion of L3 level of lumbar spinal cord, initial encounter           |  |  |
| S34.124A | Incomplete lesion of L4 level of lumbar spinal cord, initial encounter           |  |  |
| S34.125A | Incomplete lesion of L5 level of lumbar spinal cord, initial encounter           |  |  |
| S34.129A | Incomplete lesion of unspecified level of lumbar spinal cord, initial encounter  |  |  |
| S34.131A | Complete lesion of sacral spinal cord, initial encounter                         |  |  |
| S34.132A | Incomplete lesion of sacral spinal cord, initial encounter                       |  |  |
| S34.139A | Unspecified injury to sacral spinal cord, initial encounter                      |  |  |
| S34.21XA | Injury of nerve root of lumbar spine, initial encounter                          |  |  |
| S34.22XA | Injury of nerve root of sacral spine, initial encounter                          |  |  |
| S34.3XXA | Injury of cauda equina, initial encounter                                        |  |  |
| S34.4XXA | Injury of lumbosacral plexus, initial encounter                                  |  |  |

|          |                                                                                          |  |  |
|----------|------------------------------------------------------------------------------------------|--|--|
| S34.5XXA | Injury of lumbar, sacral and pelvic sympathetic nerves, initial encounter                |  |  |
| S34.6XXA | Injury of peripheral nerve(s) at abdomen, lower back and pelvis level, initial encounter |  |  |
| S34.8XXA | Injury of other nerves at abdomen, lower back and pelvis level, initial encounter        |  |  |
| S34.9XXA | Injury of unspecified nerves at abdomen, lower back and pelvis level, initial encounter  |  |  |
| S35.00XA | Unspecified injury of abdominal aorta, initial encounter                                 |  |  |
| S35.01XA | Minor laceration of abdominal aorta, initial encounter                                   |  |  |
| S35.02XA | Major laceration of abdominal aorta, initial encounter                                   |  |  |
| S35.09XA | Other injury of abdominal aorta, initial encounter                                       |  |  |
| S35.10XA | Unspecified injury of inferior vena cava, initial encounter                              |  |  |
| S35.11XA | Minor laceration of inferior vena cava, initial encounter                                |  |  |
| S35.12XA | Major laceration of inferior vena cava, initial encounter                                |  |  |
| S35.19XA | Other injury of inferior vena cava, initial encounter                                    |  |  |
| S35.211A | Minor laceration of celiac artery, initial encounter                                     |  |  |
| S35.212A | Major laceration of celiac artery, initial encounter                                     |  |  |
| S35.218A | Other injury of celiac artery, initial encounter                                         |  |  |
| S35.219A | Unspecified injury of celiac artery, initial encounter                                   |  |  |
| S35.221A | Minor laceration of superior mesenteric artery, initial encounter                        |  |  |
| S35.222A | Major laceration of superior mesenteric artery, initial encounter                        |  |  |
| S35.228A | Other injury of superior mesenteric artery, initial encounter                            |  |  |
| S35.229A | Unspecified injury of superior mesenteric artery, initial encounter                      |  |  |
| S35.231A | Minor laceration of inferior mesenteric artery, initial encounter                        |  |  |
| S35.232A | Major laceration of inferior mesenteric artery, initial encounter                        |  |  |
| S35.238A | Other injury of inferior mesenteric artery, initial encounter                            |  |  |
| S35.239A | Unspecified injury of inferior mesenteric artery, initial encounter                      |  |  |
| S35.291A | Minor laceration of branches of celiac and mesenteric artery, initial encounter          |  |  |

|          |                                                                                   |  |  |
|----------|-----------------------------------------------------------------------------------|--|--|
| S35.292A | Major laceration of branches of celiac and mesenteric artery, initial encounter   |  |  |
| S35.298A | Other injury of branches of celiac and mesenteric artery, initial encounter       |  |  |
| S35.299A | Unspecified injury of branches of celiac and mesenteric artery, initial encounter |  |  |
| S35.311A | Laceration of portal vein, initial encounter                                      |  |  |
| S35.318A | Other specified injury of portal vein, initial encounter                          |  |  |
| S35.319A | Unspecified injury of portal vein, initial encounter                              |  |  |
| S35.321A | Laceration of splenic vein, initial encounter                                     |  |  |
| S35.328A | Other specified injury of splenic vein, initial encounter                         |  |  |
| S35.329A | Unspecified injury of splenic vein, initial encounter                             |  |  |
| S35.331A | Laceration of superior mesenteric vein, initial encounter                         |  |  |
| S35.338A | Other specified injury of superior mesenteric vein, initial encounter             |  |  |
| S35.339A | Unspecified injury of superior mesenteric vein, initial encounter                 |  |  |
| S35.341A | Laceration of inferior mesenteric vein, initial encounter                         |  |  |
| S35.348A | Other specified injury of inferior mesenteric vein, initial encounter             |  |  |
| S35.349A | Unspecified injury of inferior mesenteric vein, initial encounter                 |  |  |
| S35.401A | Unspecified injury of right renal artery, initial encounter                       |  |  |
| S35.402A | Unspecified injury of left renal artery, initial encounter                        |  |  |
| S35.403A | Unspecified injury of unspecified renal artery, initial encounter                 |  |  |
| S35.404A | Unspecified injury of right renal vein, initial encounter                         |  |  |
| S35.405A | Unspecified injury of left renal vein, initial encounter                          |  |  |
| S35.406A | Unspecified injury of unspecified renal vein, initial encounter                   |  |  |
| S35.411A | Laceration of right renal artery, initial encounter                               |  |  |
| S35.412A | Laceration of left renal artery, initial encounter                                |  |  |
| S35.413A | Laceration of unspecified renal artery, initial encounter                         |  |  |
| S35.414A | Laceration of right renal vein, initial encounter                                 |  |  |
| S35.415A | Laceration of left renal vein, initial encounter                                  |  |  |
| S35.416A | Laceration of unspecified renal vein, initial encounter                           |  |  |

|          |                                                                                                               |  |  |
|----------|---------------------------------------------------------------------------------------------------------------|--|--|
| S35.491A | Other specified injury of right renal artery, initial encounter                                               |  |  |
| S35.492A | Other specified injury of left renal artery, initial encounter                                                |  |  |
| S35.493A | Other specified injury of unspecified renal artery, initial encounter                                         |  |  |
| S35.494A | Other specified injury of right renal vein, initial encounter                                                 |  |  |
| S35.495A | Other specified injury of left renal vein, initial encounter                                                  |  |  |
| S35.496A | Other specified injury of unspecified renal vein, initial encounter                                           |  |  |
| S35.50XA | Injury of unspecified iliac blood vessel(s), initial encounter                                                |  |  |
| S35.511A | Injury of right iliac artery, initial encounter                                                               |  |  |
| S35.512A | Injury of left iliac artery, initial encounter                                                                |  |  |
| S35.513A | Injury of unspecified iliac artery, initial encounter                                                         |  |  |
| S35.514A | Injury of right iliac vein, initial encounter                                                                 |  |  |
| S35.515A | Injury of left iliac vein, initial encounter                                                                  |  |  |
| S35.516A | Injury of unspecified iliac vein, initial encounter                                                           |  |  |
| S35.531A | Injury of right uterine artery, initial encounter                                                             |  |  |
| S35.532A | Injury of left uterine artery, initial encounter                                                              |  |  |
| S35.533A | Injury of unspecified uterine artery, initial encounter                                                       |  |  |
| S35.534A | Injury of right uterine vein, initial encounter                                                               |  |  |
| S35.535A | Injury of left uterine vein, initial encounter                                                                |  |  |
| S35.536A | Injury of unspecified uterine vein, initial encounter                                                         |  |  |
| S35.59XA | Injury of other iliac blood vessels, initial encounter                                                        |  |  |
| S35.8X1A | Laceration of other blood vessels at abdomen, lower back and pelvis level, initial encounter                  |  |  |
| S35.8X8A | Other specified injury of other blood vessels at abdomen, lower back and pelvis level, initial encounter      |  |  |
| S35.8X9A | Unspecified injury of other blood vessels at abdomen, lower back and pelvis level, initial encounter          |  |  |
| S35.90XA | Unspecified injury of unspecified blood vessel at abdomen, lower back and pelvis level, initial encounter     |  |  |
| S35.91XA | Laceration of unspecified blood vessel at abdomen, lower back and pelvis level, initial encounter             |  |  |
| S35.99XA | Other specified injury of unspecified blood vessel at abdomen, lower back and pelvis level, initial encounter |  |  |



|          |                                                                       |  |  |
|----------|-----------------------------------------------------------------------|--|--|
| S36.00XA | Unspecified injury of spleen, initial encounter                       |  |  |
| S36.020A | Minor contusion of spleen, initial encounter                          |  |  |
| S36.021A | Major contusion of spleen, initial encounter                          |  |  |
| S36.029A | Unspecified contusion of spleen, initial encounter                    |  |  |
| S36.030A | Superficial (capsular) laceration of spleen, initial encounter        |  |  |
| S36.031A | Moderate laceration of spleen, initial encounter                      |  |  |
| S36.032A | Major laceration of spleen, initial encounter                         |  |  |
| S36.039A | Unspecified laceration of spleen, initial encounter                   |  |  |
| S36.09XA | Other injury of spleen, initial encounter                             |  |  |
| S36.112A | Contusion of liver, initial encounter                                 |  |  |
| S36.113A | Laceration of liver, unspecified degree, initial encounter            |  |  |
| S36.114A | Minor laceration of liver, initial encounter                          |  |  |
| S36.115A | Moderate laceration of liver, initial encounter                       |  |  |
| S36.116A | Major laceration of liver, initial encounter                          |  |  |
| S36.118A | Other injury of liver, initial encounter                              |  |  |
| S36.119A | Unspecified injury of liver, initial encounter                        |  |  |
| S36.122A | Contusion of gallbladder, initial encounter                           |  |  |
| S36.123A | Laceration of gallbladder, initial encounter                          |  |  |
| S36.128A | Other injury of gallbladder, initial encounter                        |  |  |
| S36.129A | Unspecified injury of gallbladder, initial encounter                  |  |  |
| S36.13XA | Injury of bile duct, initial encounter                                |  |  |
| S36.200A | Unspecified injury of head of pancreas, initial encounter             |  |  |
| S36.201A | Unspecified injury of body of pancreas, initial encounter             |  |  |
| S36.202A | Unspecified injury of tail of pancreas, initial encounter             |  |  |
| S36.209A | Unspecified injury of unspecified part of pancreas, initial encounter |  |  |
| S36.220A | Contusion of head of pancreas, initial encounter                      |  |  |
| S36.221A | Contusion of body of pancreas, initial encounter                      |  |  |
| S36.222A | Contusion of tail of pancreas, initial encounter                      |  |  |
| S36.229A | Contusion of unspecified part of pancreas, initial encounter          |  |  |
| S36.230A | Laceration of head of pancreas, unspecified degree, initial encounter |  |  |
| S36.231A | Laceration of body of pancreas, unspecified degree, initial encounter |  |  |

|          |                                                                                   |  |  |
|----------|-----------------------------------------------------------------------------------|--|--|
| S36.232A | Laceration of tail of pancreas, unspecified degree, initial encounter             |  |  |
| S36.239A | Laceration of unspecified part of pancreas, unspecified degree, initial encounter |  |  |
| S36.240A | Minor laceration of head of pancreas, initial encounter                           |  |  |
| S36.241A | Minor laceration of body of pancreas, initial encounter                           |  |  |
| S36.242A | Minor laceration of tail of pancreas, initial encounter                           |  |  |
| S36.249A | Minor laceration of unspecified part of pancreas, initial encounter               |  |  |
| S36.250A | Moderate laceration of head of pancreas, initial encounter                        |  |  |
| S36.251A | Moderate laceration of body of pancreas, initial encounter                        |  |  |
| S36.252A | Moderate laceration of tail of pancreas, initial encounter                        |  |  |
| S36.259A | Moderate laceration of unspecified part of pancreas, initial encounter            |  |  |
| S36.260A | Major laceration of head of pancreas, initial encounter                           |  |  |
| S36.261A | Major laceration of body of pancreas, initial encounter                           |  |  |
| S36.262A | Major laceration of tail of pancreas, initial encounter                           |  |  |
| S36.269A | Major laceration of unspecified part of pancreas, initial encounter               |  |  |
| S36.290A | Other injury of head of pancreas, initial encounter                               |  |  |
| S36.291A | Other injury of body of pancreas, initial encounter                               |  |  |
| S36.292A | Other injury of tail of pancreas, initial encounter                               |  |  |
| S36.299A | Other injury of unspecified part of pancreas, initial encounter                   |  |  |
| S36.30XA | Unspecified injury of stomach, initial encounter                                  |  |  |
| S36.32XA | Contusion of stomach, initial encounter                                           |  |  |
| S36.33XA | Laceration of stomach, initial encounter                                          |  |  |
| S36.39XA | Other injury of stomach, initial encounter                                        |  |  |
| S36.400A | Unspecified injury of duodenum, initial encounter                                 |  |  |
| S36.408A | Unspecified injury of other part of small intestine, initial encounter            |  |  |
| S36.409A | Unspecified injury of unspecified part of small intestine, initial encounter      |  |  |
| S36.410A | Primary blast injury of duodenum, initial encounter                               |  |  |

|          |                                                                                |  |  |
|----------|--------------------------------------------------------------------------------|--|--|
| S36.418A | Primary blast injury of other part of small intestine, initial encounter       |  |  |
| S36.419A | Primary blast injury of unspecified part of small intestine, initial encounter |  |  |
| S36.420A | Contusion of duodenum, initial encounter                                       |  |  |
| S36.428A | Contusion of other part of small intestine, initial encounter                  |  |  |
| S36.429A | Contusion of unspecified part of small intestine, initial encounter            |  |  |
| S36.430A | Laceration of duodenum, initial encounter                                      |  |  |
| S36.438A | Laceration of other part of small intestine, initial encounter                 |  |  |
| S36.439A | Laceration of unspecified part of small intestine, initial encounter           |  |  |
| S36.490A | Other injury of duodenum, initial encounter                                    |  |  |
| S36.498A | Other injury of other part of small intestine, initial encounter               |  |  |
| S36.499A | Other injury of unspecified part of small intestine, initial encounter         |  |  |
| S36.500A | Unspecified injury of ascending [right] colon, initial encounter               |  |  |
| S36.501A | Unspecified injury of transverse colon, initial encounter                      |  |  |
| S36.502A | Unspecified injury of descending [left] colon, initial encounter               |  |  |
| S36.503A | Unspecified injury of sigmoid colon, initial encounter                         |  |  |
| S36.508A | Unspecified injury of other part of colon, initial encounter                   |  |  |
| S36.509A | Unspecified injury of unspecified part of colon, initial encounter             |  |  |
| S36.510A | Primary blast injury of ascending [right] colon, initial encounter             |  |  |
| S36.511A | Primary blast injury of transverse colon, initial encounter                    |  |  |
| S36.512A | Primary blast injury of descending [left] colon, initial encounter             |  |  |
| S36.513A | Primary blast injury of sigmoid colon, initial encounter                       |  |  |
| S36.518A | Primary blast injury of other part of colon, initial encounter                 |  |  |
| S36.519A | Primary blast injury of unspecified part of colon, initial encounter           |  |  |

|          |                                                                            |  |  |
|----------|----------------------------------------------------------------------------|--|--|
| S36.520A | Contusion of ascending [right] colon, initial encounter                    |  |  |
| S36.521A | Contusion of transverse colon, initial encounter                           |  |  |
| S36.522A | Contusion of descending [left] colon, initial encounter                    |  |  |
| S36.523A | Contusion of sigmoid colon, initial encounter                              |  |  |
| S36.528A | Contusion of other part of colon, initial encounter                        |  |  |
| S36.529A | Contusion of unspecified part of colon, initial encounter                  |  |  |
| S36.530A | Laceration of ascending [right] colon, initial encounter                   |  |  |
| S36.531A | Laceration of transverse colon, initial encounter                          |  |  |
| S36.532A | Laceration of descending [left] colon, initial encounter                   |  |  |
| S36.533A | Laceration of sigmoid colon, initial encounter                             |  |  |
| S36.538A | Laceration of other part of colon, initial encounter                       |  |  |
| S36.539A | Laceration of unspecified part of colon, initial encounter                 |  |  |
| S36.590A | Other injury of ascending [right] colon, initial encounter                 |  |  |
| S36.591A | Other injury of transverse colon, initial encounter                        |  |  |
| S36.592A | Other injury of descending [left] colon, initial encounter                 |  |  |
| S36.593A | Other injury of sigmoid colon, initial encounter                           |  |  |
| S36.598A | Other injury of other part of colon, initial encounter                     |  |  |
| S36.599A | Other injury of unspecified part of colon, initial encounter               |  |  |
| S36.60XA | Unspecified injury of rectum, initial encounter                            |  |  |
| S36.61XA | Primary blast injury of rectum, initial encounter                          |  |  |
| S36.62XA | Contusion of rectum, initial encounter                                     |  |  |
| S36.63XA | Laceration of rectum, initial encounter                                    |  |  |
| S36.69XA | Other injury of rectum, initial encounter                                  |  |  |
| S36.81XA | Injury of peritoneum, initial encounter                                    |  |  |
| S36.892A | Contusion of other intra-abdominal organs, initial encounter               |  |  |
| S36.893A | Laceration of other intra-abdominal organs, initial encounter              |  |  |
| S36.898A | Other injury of other intra-abdominal organs, initial encounter            |  |  |
| S36.899A | Unspecified injury of other intra-abdominal organs, initial encounter      |  |  |
| S36.90XA | Unspecified injury of unspecified intra-abdominal organ, initial encounter |  |  |
| S36.92XA | Contusion of unspecified intra-abdominal organ, initial encounter          |  |  |

|          |                                                                         |  |  |
|----------|-------------------------------------------------------------------------|--|--|
| S36.93XA | Laceration of unspecified intra-abdominal organ, initial encounter      |  |  |
| S36.99XA | Other injury of unspecified intra-abdominal organ, initial encounter    |  |  |
| S37.001A | Unspecified injury of right kidney, initial encounter                   |  |  |
| S37.002A | Unspecified injury of left kidney, initial encounter                    |  |  |
| S37.009A | Unspecified injury of unspecified kidney, initial encounter             |  |  |
| S37.011A | Minor contusion of right kidney, initial encounter                      |  |  |
| S37.012A | Minor contusion of left kidney, initial encounter                       |  |  |
| S37.019A | Minor contusion of unspecified kidney, initial encounter                |  |  |
| S37.021A | Major contusion of right kidney, initial encounter                      |  |  |
| S37.022A | Major contusion of left kidney, initial encounter                       |  |  |
| S37.029A | Major contusion of unspecified kidney, initial encounter                |  |  |
| S37.031A | Laceration of right kidney, unspecified degree, initial encounter       |  |  |
| S37.032A | Laceration of left kidney, unspecified degree, initial encounter        |  |  |
| S37.039A | Laceration of unspecified kidney, unspecified degree, initial encounter |  |  |
| S37.041A | Minor laceration of right kidney, initial encounter                     |  |  |
| S37.042A | Minor laceration of left kidney, initial encounter                      |  |  |
| S37.049A | Minor laceration of unspecified kidney, initial encounter               |  |  |
| S37.051A | Moderate laceration of right kidney, initial encounter                  |  |  |
| S37.052A | Moderate laceration of left kidney, initial encounter                   |  |  |
| S37.059A | Moderate laceration of unspecified kidney, initial encounter            |  |  |
| S37.061A | Major laceration of right kidney, initial encounter                     |  |  |
| S37.062A | Major laceration of left kidney, initial encounter                      |  |  |
| S37.069A | Major laceration of unspecified kidney, initial encounter               |  |  |
| S37.091A | Other injury of right kidney, initial encounter                         |  |  |
| S37.092A | Other injury of left kidney, initial encounter                          |  |  |
| S37.099A | Other injury of unspecified kidney, initial encounter                   |  |  |
| S37.10XA | Unspecified injury of ureter, initial encounter                         |  |  |
| S37.12XA | Contusion of ureter, initial encounter                                  |  |  |
| S37.13XA | Laceration of ureter, initial encounter                                 |  |  |
| S37.19XA | Other injury of ureter, initial encounter                               |  |  |

|          |                                                                        |  |  |
|----------|------------------------------------------------------------------------|--|--|
| S37.20XA | Unspecified injury of bladder, initial encounter                       |  |  |
| S37.22XA | Contusion of bladder, initial encounter                                |  |  |
| S37.23XA | Laceration of bladder, initial encounter                               |  |  |
| S37.29XA | Other injury of bladder, initial encounter                             |  |  |
| S37.30XA | Unspecified injury of urethra, initial encounter                       |  |  |
| S37.32XA | Contusion of urethra, initial encounter                                |  |  |
| S37.33XA | Laceration of urethra, initial encounter                               |  |  |
| S37.39XA | Other injury of urethra, initial encounter                             |  |  |
| S37.401A | Unspecified injury of ovary, unilateral, initial encounter             |  |  |
| S37.402A | Unspecified injury of ovary, bilateral, initial encounter              |  |  |
| S37.409A | Unspecified injury of ovary, unspecified, initial encounter            |  |  |
| S37.421A | Contusion of ovary, unilateral, initial encounter                      |  |  |
| S37.422A | Contusion of ovary, bilateral, initial encounter                       |  |  |
| S37.429A | Contusion of ovary, unspecified, initial encounter                     |  |  |
| S37.431A | Laceration of ovary, unilateral, initial encounter                     |  |  |
| S37.432A | Laceration of ovary, bilateral, initial encounter                      |  |  |
| S37.439A | Laceration of ovary, unspecified, initial encounter                    |  |  |
| S37.491A | Other injury of ovary, unilateral, initial encounter                   |  |  |
| S37.492A | Other injury of ovary, bilateral, initial encounter                    |  |  |
| S37.499A | Other injury of ovary, unspecified, initial encounter                  |  |  |
| S37.501A | Unspecified injury of fallopian tube, unilateral, initial encounter    |  |  |
| S37.502A | Unspecified injury of fallopian tube, bilateral, initial encounter     |  |  |
| S37.509A | Unspecified injury of fallopian tube, unspecified, initial encounter   |  |  |
| S37.511A | Primary blast injury of fallopian tube, unilateral, initial encounter  |  |  |
| S37.512A | Primary blast injury of fallopian tube, bilateral, initial encounter   |  |  |
| S37.519A | Primary blast injury of fallopian tube, unspecified, initial encounter |  |  |
| S37.521A | Contusion of fallopian tube, unilateral, initial encounter             |  |  |
| S37.522A | Contusion of fallopian tube, bilateral, initial encounter              |  |  |
| S37.529A | Contusion of fallopian tube, unspecified, initial encounter            |  |  |
| S37.531A | Laceration of fallopian tube, unilateral, initial encounter            |  |  |

|          |                                                                                 |  |  |
|----------|---------------------------------------------------------------------------------|--|--|
| S37.532A | Laceration of fallopian tube, bilateral, initial encounter                      |  |  |
| S37.539A | Laceration of fallopian tube, unspecified, initial encounter                    |  |  |
| S37.591A | Other injury of fallopian tube, unilateral, initial encounter                   |  |  |
| S37.592A | Other injury of fallopian tube, bilateral, initial encounter                    |  |  |
| S37.599A | Other injury of fallopian tube, unspecified, initial encounter                  |  |  |
| S37.60XA | Unspecified injury of uterus, initial encounter                                 |  |  |
| S37.62XA | Contusion of uterus, initial encounter                                          |  |  |
| S37.63XA | Laceration of uterus, initial encounter                                         |  |  |
| S37.69XA | Other injury of uterus, initial encounter                                       |  |  |
| S37.812A | Contusion of adrenal gland, initial encounter                                   |  |  |
| S37.813A | Laceration of adrenal gland, initial encounter                                  |  |  |
| S37.818A | Other injury of adrenal gland, initial encounter                                |  |  |
| S37.819A | Unspecified injury of adrenal gland, initial encounter                          |  |  |
| S37.822A | Contusion of prostate, initial encounter                                        |  |  |
| S37.823A | Laceration of prostate, initial encounter                                       |  |  |
| S37.828A | Other injury of prostate, initial encounter                                     |  |  |
| S37.829A | Unspecified injury of prostate, initial encounter                               |  |  |
| S37.892A | Contusion of other urinary and pelvic organ, initial encounter                  |  |  |
| S37.893A | Laceration of other urinary and pelvic organ, initial encounter                 |  |  |
| S37.898A | Other injury of other urinary and pelvic organ, initial encounter               |  |  |
| S37.899A | Unspecified injury of other urinary and pelvic organ, initial encounter         |  |  |
| S37.90XA | Unspecified injury of unspecified urinary and pelvic organ, initial encounter   |  |  |
| S37.92XA | Contusion of unspecified urinary and pelvic organ, initial encounter            |  |  |
| S37.93XA | Laceration of unspecified urinary and pelvic organ, initial encounter           |  |  |
| S37.99XA | Other injury of unspecified urinary and pelvic organ, initial encounter         |  |  |
| S38.001A | Crushing injury of unspecified external genital organs, male, initial encounter |  |  |

|          |                                                                                    |  |  |
|----------|------------------------------------------------------------------------------------|--|--|
| S38.002A | Crushing injury of unspecified external genital organs, female, initial encounter  |  |  |
| S38.01XA | Crushing injury of penis, initial encounter                                        |  |  |
| S38.02XA | Crushing injury of scrotum and testis, initial encounter                           |  |  |
| S38.03XA | Crushing injury of vulva, initial encounter                                        |  |  |
| S38.1XXA | Crushing injury of abdomen, lower back, and pelvis, initial encounter              |  |  |
| S38.211A | Complete traumatic amputation of female external genital organs, initial encounter |  |  |
| S38.212A | Partial traumatic amputation of female external genital organs, initial encounter  |  |  |
| S38.221A | Complete traumatic amputation of penis, initial encounter                          |  |  |
| S38.222A | Partial traumatic amputation of penis, initial encounter                           |  |  |
| S38.231A | Complete traumatic amputation of scrotum and testis, initial encounter             |  |  |
| S38.232A | Partial traumatic amputation of scrotum and testis, initial encounter              |  |  |
| S38.3XXA | Transection (partial) of abdomen, initial encounter                                |  |  |
| S39.001A | Unspecified injury of muscle, fascia and tendon of abdomen, initial encounter      |  |  |
| S39.002A | Unspecified injury of muscle, fascia and tendon of lower back, initial encounter   |  |  |
| S39.003A | Unspecified injury of muscle, fascia and tendon of pelvis, initial encounter       |  |  |
| S39.021A | Laceration of muscle, fascia and tendon of abdomen, initial encounter              |  |  |
| S39.022A | Laceration of muscle, fascia and tendon of lower back, initial encounter           |  |  |
| S39.023A | Laceration of muscle, fascia and tendon of pelvis, initial encounter               |  |  |
| S39.091A | Other injury of muscle, fascia and tendon of abdomen, initial encounter            |  |  |
| S39.092A | Other injury of muscle, fascia and tendon of lower back, initial encounter         |  |  |
| S39.093A | Other injury of muscle, fascia and tendon of pelvis, initial encounter             |  |  |
| S39.81XA | Other specified injuries of abdomen, initial encounter                             |  |  |
| S39.82XA | Other specified injuries of lower back, initial encounter                          |  |  |



|          |                                                                  |  |  |
|----------|------------------------------------------------------------------|--|--|
| S39.83XA | Other specified injuries of pelvis, initial encounter            |  |  |
| S39.840A | Fracture of corpus cavernosum penis, initial encounter           |  |  |
| S39.848A | Other specified injuries of external genitals, initial encounter |  |  |
| S39.91XA | Unspecified injury of abdomen, initial encounter                 |  |  |
| S39.92XA | Unspecified injury of lower back, initial encounter              |  |  |
| S39.93XA | Unspecified injury of pelvis, initial encounter                  |  |  |
| S39.94XA | Unspecified injury of external genitals, initial encounter       |  |  |

## Included and Excluded ICD-10-CM Diagnosis Subcodes for Acute Angle Closure Glaucoma Condition Group

| Included ICD10-CM diagnosis subcodes (n=4) |                                               | Excluded ICD-10-CM diagnosis subcodes (n=229) |                                                                 |
|--------------------------------------------|-----------------------------------------------|-----------------------------------------------|-----------------------------------------------------------------|
| Subcode                                    | Subcode description                           | Subcode                                       | Subcode description                                             |
| H40.211                                    | Acute angle-closure glaucoma, right eye       | H40.001                                       | Preglaucoma, unspecified, right eye                             |
| H40.212                                    | Acute angle-closure glaucoma, left eye        | H40.002                                       | Preglaucoma, unspecified, left eye                              |
| H40.213                                    | Acute angle-closure glaucoma, bilateral       | H40.003                                       | Preglaucoma, unspecified, bilateral                             |
| H40.219                                    | Acute angle-closure glaucoma, unspecified eye | H40.009                                       | Preglaucoma, unspecified, unspecified eye                       |
|                                            |                                               | H40.011                                       | Open angle with borderline findings, low risk, right eye        |
|                                            |                                               | H40.012                                       | Open angle with borderline findings, low risk, left eye         |
|                                            |                                               | H40.013                                       | Open angle with borderline findings, low risk, bilateral        |
|                                            |                                               | H40.019                                       | Open angle with borderline findings, low risk, unspecified eye  |
|                                            |                                               | H40.021                                       | Open angle with borderline findings, high risk, right eye       |
|                                            |                                               | H40.022                                       | Open angle with borderline findings, high risk, left eye        |
|                                            |                                               | H40.023                                       | Open angle with borderline findings, high risk, bilateral       |
|                                            |                                               | H40.029                                       | Open angle with borderline findings, high risk, unspecified eye |
|                                            |                                               | H40.031                                       | Anatomical narrow angle, right eye                              |
|                                            |                                               | H40.032                                       | Anatomical narrow angle, left eye                               |
|                                            |                                               | H40.033                                       | Anatomical narrow angle, bilateral                              |
|                                            |                                               | H40.039                                       | Anatomical narrow angle, unspecified eye                        |
|                                            |                                               | H40.041                                       | Steroid responder, right eye                                    |
|                                            |                                               | H40.042                                       | Steroid responder, left eye                                     |
|                                            |                                               | H40.043                                       | Steroid responder, bilateral                                    |
|                                            |                                               | H40.049                                       | Steroid responder, unspecified eye                              |
|                                            |                                               | H40.051                                       | Ocular hypertension, right eye                                  |
|                                            |                                               | H40.052                                       | Ocular hypertension, left eye                                   |
|                                            |                                               | H40.053                                       | Ocular hypertension, bilateral                                  |
|                                            |                                               | H40.059                                       | Ocular hypertension, unspecified eye                            |
|                                            |                                               | H40.061                                       | Primary angle closure without glaucoma damage, right eye        |
|                                            |                                               | H40.062                                       | Primary angle closure without glaucoma damage, left eye         |
|                                            |                                               | H40.063                                       | Primary angle closure without glaucoma damage, bilateral        |

|  |  |          |                                                                |
|--|--|----------|----------------------------------------------------------------|
|  |  | H40.069  | Primary angle closure without glaucoma damage, unspecified eye |
|  |  | H40.10X0 | Unspecified open-angle glaucoma, stage unspecified             |
|  |  | H40.10X1 | Unspecified open-angle glaucoma, mild stage                    |
|  |  | H40.10X2 | Unspecified open-angle glaucoma, moderate stage                |
|  |  | H40.10X3 | Unspecified open-angle glaucoma, severe stage                  |
|  |  | H40.10X4 | Unspecified open-angle glaucoma, indeterminate stage           |
|  |  | H40.11X0 | Primary open-angle glaucoma, stage unspecified                 |
|  |  | H40.11X1 | Primary open-angle glaucoma, mild stage                        |
|  |  | H40.11X2 | Primary open-angle glaucoma, moderate stage                    |
|  |  | H40.11X3 | Primary open-angle glaucoma, severe stage                      |
|  |  | H40.11X4 | Primary open-angle glaucoma, indeterminate stage               |
|  |  | H40.1210 | Low-tension glaucoma, right eye, stage unspecified             |
|  |  | H40.1211 | Low-tension glaucoma, right eye, mild stage                    |
|  |  | H40.1212 | Low-tension glaucoma, right eye, moderate stage                |
|  |  | H40.1213 | Low-tension glaucoma, right eye, severe stage                  |
|  |  | H40.1214 | Low-tension glaucoma, right eye, indeterminate stage           |
|  |  | H40.1220 | Low-tension glaucoma, left eye, stage unspecified              |
|  |  | H40.1221 | Low-tension glaucoma, left eye, mild stage                     |
|  |  | H40.1222 | Low-tension glaucoma, left eye, moderate stage                 |
|  |  | H40.1223 | Low-tension glaucoma, left eye, severe stage                   |
|  |  | H40.1224 | Low-tension glaucoma, left eye, indeterminate stage            |
|  |  | H40.1230 | Low-tension glaucoma, bilateral, stage unspecified             |
|  |  | H40.1231 | Low-tension glaucoma, bilateral, mild stage                    |
|  |  | H40.1232 | Low-tension glaucoma, bilateral, moderate stage                |
|  |  | H40.1233 | Low-tension glaucoma, bilateral, severe stage                  |
|  |  | H40.1234 | Low-tension glaucoma, bilateral, indeterminate stage           |
|  |  | H40.1290 | Low-tension glaucoma, unspecified eye, stage unspecified       |
|  |  | H40.1291 | Low-tension glaucoma, unspecified eye, mild stage              |
|  |  | H40.1292 | Low-tension glaucoma, unspecified eye, moderate stage          |
|  |  | H40.1293 | Low-tension glaucoma, unspecified eye, severe stage            |
|  |  | H40.1294 | Low-tension glaucoma, unspecified eye, indeterminate stage     |

|  |  |          |                                                                                  |
|--|--|----------|----------------------------------------------------------------------------------|
|  |  | H40.1310 | Pigmentary glaucoma, right eye, stage unspecified                                |
|  |  | H40.1311 | Pigmentary glaucoma, right eye, mild stage                                       |
|  |  | H40.1312 | Pigmentary glaucoma, right eye, moderate stage                                   |
|  |  | H40.1313 | Pigmentary glaucoma, right eye, severe stage                                     |
|  |  | H40.1314 | Pigmentary glaucoma, right eye, indeterminate stage                              |
|  |  | H40.1320 | Pigmentary glaucoma, left eye, stage unspecified                                 |
|  |  | H40.1321 | Pigmentary glaucoma, left eye, mild stage                                        |
|  |  | H40.1322 | Pigmentary glaucoma, left eye, moderate stage                                    |
|  |  | H40.1323 | Pigmentary glaucoma, left eye, severe stage                                      |
|  |  | H40.1324 | Pigmentary glaucoma, left eye, indeterminate stage                               |
|  |  | H40.1330 | Pigmentary glaucoma, bilateral, stage unspecified                                |
|  |  | H40.1331 | Pigmentary glaucoma, bilateral, mild stage                                       |
|  |  | H40.1332 | Pigmentary glaucoma, bilateral, moderate stage                                   |
|  |  | H40.1333 | Pigmentary glaucoma, bilateral, severe stage                                     |
|  |  | H40.1334 | Pigmentary glaucoma, bilateral, indeterminate stage                              |
|  |  | H40.1390 | Pigmentary glaucoma, unspecified eye, stage unspecified                          |
|  |  | H40.1391 | Pigmentary glaucoma, unspecified eye, mild stage                                 |
|  |  | H40.1392 | Pigmentary glaucoma, unspecified eye, moderate stage                             |
|  |  | H40.1393 | Pigmentary glaucoma, unspecified eye, severe stage                               |
|  |  | H40.1394 | Pigmentary glaucoma, unspecified eye, indeterminate stage                        |
|  |  | H40.1410 | Capsular glaucoma with pseudoexfoliation of lens, right eye, stage unspecified   |
|  |  | H40.1411 | Capsular glaucoma with pseudoexfoliation of lens, right eye, mild stage          |
|  |  | H40.1412 | Capsular glaucoma with pseudoexfoliation of lens, right eye, moderate stage      |
|  |  | H40.1413 | Capsular glaucoma with pseudoexfoliation of lens, right eye, severe stage        |
|  |  | H40.1414 | Capsular glaucoma with pseudoexfoliation of lens, right eye, indeterminate stage |
|  |  | H40.1420 | Capsular glaucoma with pseudoexfoliation of lens, left eye, stage unspecified    |
|  |  | H40.1421 | Capsular glaucoma with pseudoexfoliation of lens, left eye, mild stage           |

|  |  |          |                                                                                        |
|--|--|----------|----------------------------------------------------------------------------------------|
|  |  | H40.1422 | Capsular glaucoma with pseudoexfoliation of lens, left eye, moderate stage             |
|  |  | H40.1423 | Capsular glaucoma with pseudoexfoliation of lens, left eye, severe stage               |
|  |  | H40.1424 | Capsular glaucoma with pseudoexfoliation of lens, left eye, indeterminate stage        |
|  |  | H40.1430 | Capsular glaucoma with pseudoexfoliation of lens, bilateral, stage unspecified         |
|  |  | H40.1431 | Capsular glaucoma with pseudoexfoliation of lens, bilateral, mild stage                |
|  |  | H40.1432 | Capsular glaucoma with pseudoexfoliation of lens, bilateral, moderate stage            |
|  |  | H40.1433 | Capsular glaucoma with pseudoexfoliation of lens, bilateral, severe stage              |
|  |  | H40.1434 | Capsular glaucoma with pseudoexfoliation of lens, bilateral, indeterminate stage       |
|  |  | H40.1490 | Capsular glaucoma with pseudoexfoliation of lens, unspecified eye, stage unspecified   |
|  |  | H40.1491 | Capsular glaucoma with pseudoexfoliation of lens, unspecified eye, mild stage          |
|  |  | H40.1492 | Capsular glaucoma with pseudoexfoliation of lens, unspecified eye, moderate stage      |
|  |  | H40.1493 | Capsular glaucoma with pseudoexfoliation of lens, unspecified eye, severe stage        |
|  |  | H40.1494 | Capsular glaucoma with pseudoexfoliation of lens, unspecified eye, indeterminate stage |
|  |  | H40.151  | Residual stage of open-angle glaucoma, right eye                                       |
|  |  | H40.152  | Residual stage of open-angle glaucoma, left eye                                        |
|  |  | H40.153  | Residual stage of open-angle glaucoma, bilateral                                       |
|  |  | H40.159  | Residual stage of open-angle glaucoma, unspecified eye                                 |
|  |  | H40.20X0 | Unspecified primary angle-closure glaucoma, stage unspecified                          |
|  |  | H40.20X1 | Unspecified primary angle-closure glaucoma, mild stage                                 |
|  |  | H40.20X2 | Unspecified primary angle-closure glaucoma, moderate stage                             |
|  |  | H40.20X3 | Unspecified primary angle-closure glaucoma, severe stage                               |

|  |  |          |                                                                      |
|--|--|----------|----------------------------------------------------------------------|
|  |  | H40.20X4 | Unspecified primary angle-closure glaucoma, indeterminate stage      |
|  |  | H40.2210 | Chronic angle-closure glaucoma, right eye, stage unspecified         |
|  |  | H40.2211 | Chronic angle-closure glaucoma, right eye, mild stage                |
|  |  | H40.2212 | Chronic angle-closure glaucoma, right eye, moderate stage            |
|  |  | H40.2213 | Chronic angle-closure glaucoma, right eye, severe stage              |
|  |  | H40.2214 | Chronic angle-closure glaucoma, right eye, indeterminate stage       |
|  |  | H40.2220 | Chronic angle-closure glaucoma, left eye, stage unspecified          |
|  |  | H40.2221 | Chronic angle-closure glaucoma, left eye, mild stage                 |
|  |  | H40.2222 | Chronic angle-closure glaucoma, left eye, moderate stage             |
|  |  | H40.2223 | Chronic angle-closure glaucoma, left eye, severe stage               |
|  |  | H40.2224 | Chronic angle-closure glaucoma, left eye, indeterminate stage        |
|  |  | H40.2230 | Chronic angle-closure glaucoma, bilateral, stage unspecified         |
|  |  | H40.2231 | Chronic angle-closure glaucoma, bilateral, mild stage                |
|  |  | H40.2232 | Chronic angle-closure glaucoma, bilateral, moderate stage            |
|  |  | H40.2233 | Chronic angle-closure glaucoma, bilateral, severe stage              |
|  |  | H40.2234 | Chronic angle-closure glaucoma, bilateral, indeterminate stage       |
|  |  | H40.2290 | Chronic angle-closure glaucoma, unspecified eye, stage unspecified   |
|  |  | H40.2291 | Chronic angle-closure glaucoma, unspecified eye, mild stage          |
|  |  | H40.2292 | Chronic angle-closure glaucoma, unspecified eye, moderate stage      |
|  |  | H40.2293 | Chronic angle-closure glaucoma, unspecified eye, severe stage        |
|  |  | H40.2294 | Chronic angle-closure glaucoma, unspecified eye, indeterminate stage |
|  |  | H40.231  | Intermittent angle-closure glaucoma, right eye                       |
|  |  | H40.232  | Intermittent angle-closure glaucoma, left eye                        |

|  |  |          |                                                                        |
|--|--|----------|------------------------------------------------------------------------|
|  |  | H40.233  | Intermittent angle-closure glaucoma, bilateral                         |
|  |  | H40.239  | Intermittent angle-closure glaucoma, unspecified eye                   |
|  |  | H40.241  | Residual stage of angle-closure glaucoma, right eye                    |
|  |  | H40.242  | Residual stage of angle-closure glaucoma, left eye                     |
|  |  | H40.243  | Residual stage of angle-closure glaucoma, bilateral                    |
|  |  | H40.249  | Residual stage of angle-closure glaucoma, unspecified eye              |
|  |  | H40.30X0 | Glaucoma secondary to eye trauma, unspecified eye, stage unspecified   |
|  |  | H40.30X1 | Glaucoma secondary to eye trauma, unspecified eye, mild stage          |
|  |  | H40.30X2 | Glaucoma secondary to eye trauma, unspecified eye, moderate stage      |
|  |  | H40.30X3 | Glaucoma secondary to eye trauma, unspecified eye, severe stage        |
|  |  | H40.30X4 | Glaucoma secondary to eye trauma, unspecified eye, indeterminate stage |
|  |  | H40.31X0 | Glaucoma secondary to eye trauma, right eye, stage unspecified         |
|  |  | H40.31X1 | Glaucoma secondary to eye trauma, right eye, mild stage                |
|  |  | H40.31X2 | Glaucoma secondary to eye trauma, right eye, moderate stage            |
|  |  | H40.31X3 | Glaucoma secondary to eye trauma, right eye, severe stage              |
|  |  | H40.31X4 | Glaucoma secondary to eye trauma, right eye, indeterminate stage       |
|  |  | H40.32X0 | Glaucoma secondary to eye trauma, left eye, stage unspecified          |
|  |  | H40.32X1 | Glaucoma secondary to eye trauma, left eye, mild stage                 |
|  |  | H40.32X2 | Glaucoma secondary to eye trauma, left eye, moderate stage             |
|  |  | H40.32X3 | Glaucoma secondary to eye trauma, left eye, severe stage               |
|  |  | H40.32X4 | Glaucoma secondary to eye trauma, left eye, indeterminate stage        |
|  |  | H40.33X0 | Glaucoma secondary to eye trauma, bilateral, stage unspecified         |
|  |  | H40.33X1 | Glaucoma secondary to eye trauma, bilateral, mild stage                |

|  |  |          |                                                                              |
|--|--|----------|------------------------------------------------------------------------------|
|  |  | H40.33X2 | Glaucoma secondary to eye trauma, bilateral, moderate stage                  |
|  |  | H40.33X3 | Glaucoma secondary to eye trauma, bilateral, severe stage                    |
|  |  | H40.33X4 | Glaucoma secondary to eye trauma, bilateral, indeterminate stage             |
|  |  | H40.40X0 | Glaucoma secondary to eye inflammation, unspecified eye, stage unspecified   |
|  |  | H40.40X1 | Glaucoma secondary to eye inflammation, unspecified eye, mild stage          |
|  |  | H40.40X2 | Glaucoma secondary to eye inflammation, unspecified eye, moderate stage      |
|  |  | H40.40X3 | Glaucoma secondary to eye inflammation, unspecified eye, severe stage        |
|  |  | H40.40X4 | Glaucoma secondary to eye inflammation, unspecified eye, indeterminate stage |
|  |  | H40.41X0 | Glaucoma secondary to eye inflammation, right eye, stage unspecified         |
|  |  | H40.41X1 | Glaucoma secondary to eye inflammation, right eye, mild stage                |
|  |  | H40.41X2 | Glaucoma secondary to eye inflammation, right eye, moderate stage            |
|  |  | H40.41X3 | Glaucoma secondary to eye inflammation, right eye, severe stage              |
|  |  | H40.41X4 | Glaucoma secondary to eye inflammation, right eye, indeterminate stage       |
|  |  | H40.42X0 | Glaucoma secondary to eye inflammation, left eye, stage unspecified          |
|  |  | H40.42X1 | Glaucoma secondary to eye inflammation, left eye, mild stage                 |
|  |  | H40.42X2 | Glaucoma secondary to eye inflammation, left eye, moderate stage             |
|  |  | H40.42X3 | Glaucoma secondary to eye inflammation, left eye, severe stage               |
|  |  | H40.42X4 | Glaucoma secondary to eye inflammation, left eye, indeterminate stage        |
|  |  | H40.43X0 | Glaucoma secondary to eye inflammation, bilateral, stage unspecified         |



|  |  |          |                                                                                 |
|--|--|----------|---------------------------------------------------------------------------------|
|  |  | H40.43X1 | Glaucoma secondary to eye inflammation, bilateral, mild stage                   |
|  |  | H40.43X2 | Glaucoma secondary to eye inflammation, bilateral, moderate stage               |
|  |  | H40.43X3 | Glaucoma secondary to eye inflammation, bilateral, severe stage                 |
|  |  | H40.43X4 | Glaucoma secondary to eye inflammation, bilateral, indeterminate stage          |
|  |  | H40.50X0 | Glaucoma secondary to other eye disorders, unspecified eye, stage unspecified   |
|  |  | H40.50X1 | Glaucoma secondary to other eye disorders, unspecified eye, mild stage          |
|  |  | H40.50X2 | Glaucoma secondary to other eye disorders, unspecified eye, moderate stage      |
|  |  | H40.50X3 | Glaucoma secondary to other eye disorders, unspecified eye, severe stage        |
|  |  | H40.50X4 | Glaucoma secondary to other eye disorders, unspecified eye, indeterminate stage |
|  |  | H40.51X0 | Glaucoma secondary to other eye disorders, right eye, stage unspecified         |
|  |  | H40.51X1 | Glaucoma secondary to other eye disorders, right eye, mild stage                |
|  |  | H40.51X2 | Glaucoma secondary to other eye disorders, right eye, moderate stage            |
|  |  | H40.51X3 | Glaucoma secondary to other eye disorders, right eye, severe stage              |
|  |  | H40.51X4 | Glaucoma secondary to other eye disorders, right eye, indeterminate stage       |
|  |  | H40.52X0 | Glaucoma secondary to other eye disorders, left eye, stage unspecified          |
|  |  | H40.52X1 | Glaucoma secondary to other eye disorders, left eye, mild stage                 |
|  |  | H40.52X2 | Glaucoma secondary to other eye disorders, left eye, moderate stage             |
|  |  | H40.52X3 | Glaucoma secondary to other eye disorders, left eye, severe stage               |
|  |  | H40.52X4 | Glaucoma secondary to other eye disorders, left eye, indeterminate stage        |

|  |  |          |                                                                           |
|--|--|----------|---------------------------------------------------------------------------|
|  |  | H40.53X0 | Glaucoma secondary to other eye disorders, bilateral, stage unspecified   |
|  |  | H40.53X1 | Glaucoma secondary to other eye disorders, bilateral, mild stage          |
|  |  | H40.53X2 | Glaucoma secondary to other eye disorders, bilateral, moderate stage      |
|  |  | H40.53X3 | Glaucoma secondary to other eye disorders, bilateral, severe stage        |
|  |  | H40.53X4 | Glaucoma secondary to other eye disorders, bilateral, indeterminate stage |
|  |  | H40.60X0 | Glaucoma secondary to drugs, unspecified eye, stage unspecified           |
|  |  | H40.60X1 | Glaucoma secondary to drugs, unspecified eye, mild stage                  |
|  |  | H40.60X2 | Glaucoma secondary to drugs, unspecified eye, moderate stage              |
|  |  | H40.60X3 | Glaucoma secondary to drugs, unspecified eye, severe stage                |
|  |  | H40.60X4 | Glaucoma secondary to drugs, unspecified eye, indeterminate stage         |
|  |  | H40.61X0 | Glaucoma secondary to drugs, right eye, stage unspecified                 |
|  |  | H40.61X1 | Glaucoma secondary to drugs, right eye, mild stage                        |
|  |  | H40.61X2 | Glaucoma secondary to drugs, right eye, moderate stage                    |
|  |  | H40.61X3 | Glaucoma secondary to drugs, right eye, severe stage                      |
|  |  | H40.61X4 | Glaucoma secondary to drugs, right eye, indeterminate stage               |
|  |  | H40.62X0 | Glaucoma secondary to drugs, left eye, stage unspecified                  |
|  |  | H40.62X1 | Glaucoma secondary to drugs, left eye, mild stage                         |
|  |  | H40.62X2 | Glaucoma secondary to drugs, left eye, moderate stage                     |
|  |  | H40.62X3 | Glaucoma secondary to drugs, left eye, severe stage                       |
|  |  | H40.62X4 | Glaucoma secondary to drugs, left eye, indeterminate stage                |
|  |  | H40.63X0 | Glaucoma secondary to drugs, bilateral, stage unspecified                 |
|  |  | H40.63X1 | Glaucoma secondary to drugs, bilateral, mild stage                        |
|  |  | H40.63X2 | Glaucoma secondary to drugs, bilateral, moderate stage                    |
|  |  | H40.63X3 | Glaucoma secondary to drugs, bilateral, severe stage                      |

|  |  |          |                                                                     |
|--|--|----------|---------------------------------------------------------------------|
|  |  | H40.63X4 | Glaucoma secondary to drugs, bilateral, indeterminate stage         |
|  |  | H40.811  | Glaucoma with increased episcleral venous pressure, right eye       |
|  |  | H40.812  | Glaucoma with increased episcleral venous pressure, left eye        |
|  |  | H40.813  | Glaucoma with increased episcleral venous pressure, bilateral       |
|  |  | H40.819  | Glaucoma with increased episcleral venous pressure, unspecified eye |
|  |  | H40.821  | Hypersecretion glaucoma, right eye                                  |
|  |  | H40.822  | Hypersecretion glaucoma, left eye                                   |
|  |  | H40.823  | Hypersecretion glaucoma, bilateral                                  |
|  |  | H40.829  | Hypersecretion glaucoma, unspecified eye                            |
|  |  | H40.831  | Aqueous misdirection, right eye                                     |
|  |  | H40.832  | Aqueous misdirection, left eye                                      |
|  |  | H40.833  | Aqueous misdirection, bilateral                                     |
|  |  | H40.839  | Aqueous misdirection, unspecified eye                               |
|  |  | H40.89   | Other specified glaucoma                                            |
|  |  | H40.9    | Unspecified glaucoma                                                |

### Included and Excluded ICD-10-CM Diagnosis Subcodes for Acute Appendicitis Condition Group

| Included ICD-10-CM diagnosis subcodes (n=4) |                                                 | Excluded ICD-10-CM diagnosis subcodes (n=0) |                     |
|---------------------------------------------|-------------------------------------------------|---------------------------------------------|---------------------|
| Subcode                                     | Subcode description                             | Subcode                                     | Subcode description |
| K35.2                                       | Acute appendicitis with generalized peritonitis |                                             |                     |
| K35.3                                       | Acute appendicitis with localized peritonitis   |                                             |                     |
| K35.80                                      | Unspecified acute appendicitis                  |                                             |                     |
| K35.89                                      | Other acute appendicitis                        |                                             |                     |

### Included and Excluded ICD-10- CM Diagnosis Subcodes for Acute Pancreatitis Condition Group

| Included ICD-10-CM diagnosis subcodes (n=6) |                                    | Excluded ICD-10-CM diagnosis subcodes (n=0) |                     |
|---------------------------------------------|------------------------------------|---------------------------------------------|---------------------|
| Subcode                                     | Subcode description                | Subcode                                     | Subcode description |
| K85.0                                       | Idiopathic acute pancreatitis      |                                             |                     |
| K85.1                                       | Biliary acute pancreatitis         |                                             |                     |
| K85.2                                       | Alcohol induced acute pancreatitis |                                             |                     |
| K85.3                                       | Drug induced acute pancreatitis    |                                             |                     |
| K85.8                                       | Other acute pancreatitis           |                                             |                     |
| K85.9                                       | Acute pancreatitis, unspecified    |                                             |                     |

### Included and Excluded ICD-10- CM Diagnosis Subcodes for Acute Respiratory Distress Syndrome Condition Group

| Included ICD-10-CM diagnosis subcodes (n=1) |                                     | Excluded ICD-10-CM diagnosis subcodes (n=0) |                     |
|---------------------------------------------|-------------------------------------|---------------------------------------------|---------------------|
| Subcode                                     | Subcode description                 | Subcode                                     | Subcode description |
| J80                                         | Acute respiratory distress syndrome |                                             |                     |

### Included and Excluded ICD-10-CM Diagnosis Subcodes for Alcohol Withdrawal Condition Group

| Included ICD-10-CM diagnosis subcodes (n=4) |                                                                | Excluded ICD-10-CM diagnosis subcodes (n=1) |                                                       |
|---------------------------------------------|----------------------------------------------------------------|---------------------------------------------|-------------------------------------------------------|
| Subcode                                     | Subcode description                                            | Subcode                                     | Subcode description                                   |
| F10.230                                     | Alcohol dependence with withdrawal, uncomplicated              | F10.24                                      | Alcohol dependence with alcohol-induced mood disorder |
| F10.231                                     | Alcohol dependence with withdrawal delirium                    |                                             |                                                       |
| F10.232                                     | Alcohol dependence with withdrawal with perceptual disturbance |                                             |                                                       |
| F10.239                                     | Alcohol dependence with withdrawal, unspecified                |                                             |                                                       |

### Included and Excluded ICD-10-CM Diagnosis Subcodes for Anaphylaxis Condition Group

| Included ICD-10-CM diagnosis subcodes (n=11) |                                                                         | Excluded ICD-10-CM diagnosis subcodes (n=6) |                                                                           |
|----------------------------------------------|-------------------------------------------------------------------------|---------------------------------------------|---------------------------------------------------------------------------|
| Subcode                                      | Subcode description                                                     | Subcode                                     | Subcode description                                                       |
| T78.00XA                                     | Anaphylactic reaction due to unspecified food, initial encounter        | T78.1XXA                                    | Other adverse food reactions, not elsewhere classified, initial encounter |
| T78.01XA                                     | Anaphylactic reaction due to peanuts, initial encounter                 | T78.3XXA                                    | Angioneurotic edema, initial encounter                                    |
| T78.02XA                                     | Anaphylactic reaction due to shellfish (crustaceans), initial encounter | T78.40XA                                    | Allergy, unspecified, initial encounter                                   |
| T78.03XA                                     | Anaphylactic reaction due to other fish, initial encounter              | T78.41XA                                    | Arthus phenomenon, initial encounter                                      |
| T78.04XA                                     | Anaphylactic reaction due to fruits and vegetables, initial encounter   | T78.49XA                                    | Other allergy, initial encounter                                          |
| T78.05XA                                     | Anaphylactic reaction due to tree nuts and seeds, initial encounter     | T78.8XXA                                    | Other adverse effects, not elsewhere classified, initial encounter        |
| T78.06XA                                     | Anaphylactic reaction due to food additives, initial encounter          |                                             |                                                                           |
| T78.07XA                                     | Anaphylactic reaction due to milk and dairy products, initial encounter |                                             |                                                                           |
| T78.08XA                                     | Anaphylactic reaction due to eggs, initial encounter                    |                                             |                                                                           |
| T78.09XA                                     | Anaphylactic reaction due to other food products, initial encounter     |                                             |                                                                           |
| T78.2XXA                                     | Anaphylactic shock, unspecified, initial encounter                      |                                             |                                                                           |

**Included and Excluded ICD-10-CM Diagnosis Subcodes for Angina and Other Acute Ischemic Heart Disease Condition Group**

| <b>Included ICD-10-CM diagnosis subcodes (n=8)</b> |                                                                  | <b>Excluded ICD-10-CM diagnosis subcodes (n=0)</b> |                            |
|----------------------------------------------------|------------------------------------------------------------------|----------------------------------------------------|----------------------------|
| <b>Subcode</b>                                     | <b>Subcode description</b>                                       | <b>Subcode</b>                                     | <b>Subcode description</b> |
| I20.0                                              | Unstable angina                                                  |                                                    |                            |
| I20.1                                              | Angina pectoris with documented spasm                            |                                                    |                            |
| I20.8                                              | Other forms of angina pectoris                                   |                                                    |                            |
| I20.9                                              | Angina pectoris, unspecified                                     |                                                    |                            |
| I24.0                                              | Acute coronary thrombosis not resulting in myocardial infarction |                                                    |                            |
| I24.1                                              | Dressler's syndrome                                              |                                                    |                            |
| I24.8                                              | Other forms of acute ischemic heart disease                      |                                                    |                            |
| I24.9                                              | Acute ischemic heart disease, unspecified                        |                                                    |                            |

### Included and Excluded ICD-10-CM Diagnosis Subcodes for Aortic Aneurysm and Dissection Condition Group

| Included ICD-10-CM diagnosis subcodes (n=12) |                                                      | Excluded ICD-10-CM diagnosis subcodes (n=0) |                     |
|----------------------------------------------|------------------------------------------------------|---------------------------------------------|---------------------|
| Subcode                                      | Subcode description                                  | Subcode                                     | Subcode description |
| I71.00                                       | Dissection of unspecified site of aorta              |                                             |                     |
| I71.01                                       | Dissection of thoracic aorta                         |                                             |                     |
| I71.02                                       | Dissection of abdominal aorta                        |                                             |                     |
| I71.03                                       | Dissection of thoracoabdominal aorta                 |                                             |                     |
| I71.1                                        | Thoracic aortic aneurysm, ruptured                   |                                             |                     |
| I71.2                                        | Thoracic aortic aneurysm, without rupture            |                                             |                     |
| I71.3                                        | Abdominal aortic aneurysm, ruptured                  |                                             |                     |
| I71.4                                        | Abdominal aortic aneurysm, without rupture           |                                             |                     |
| I71.5                                        | Thoracoabdominal aortic aneurysm, ruptured           |                                             |                     |
| I71.6                                        | Thoracoabdominal aortic aneurysm, without rupture    |                                             |                     |
| I71.8                                        | Aortic aneurysm of unspecified site, ruptured        |                                             |                     |
| I71.9                                        | Aortic aneurysm of unspecified site, without rupture |                                             |                     |

### Included and Excluded ICD-10-CM Diagnosis Subcodes for Arterial Embolism and Thrombosis Condition Group

| Included ICD-10-CM diagnosis subcodes (n=12) |                                                                 | Excluded ICD-10-CM diagnosis subcodes (n=0) |                     |
|----------------------------------------------|-----------------------------------------------------------------|---------------------------------------------|---------------------|
| Subcode                                      | Subcode description                                             | Subcode                                     | Subcode description |
| I74.01                                       | Saddle embolus of abdominal aorta                               |                                             |                     |
| I74.09                                       | Other arterial embolism and thrombosis of abdominal aorta       |                                             |                     |
| I74.10                                       | Embolism and thrombosis of unspecified parts of aorta           |                                             |                     |
| I74.11                                       | Embolism and thrombosis of thoracic aorta                       |                                             |                     |
| I74.19                                       | Embolism and thrombosis of other parts of aorta                 |                                             |                     |
| I74.2                                        | Embolism and thrombosis of arteries of the upper extremities    |                                             |                     |
| I74.3                                        | Embolism and thrombosis of arteries of the lower extremities    |                                             |                     |
| I74.4                                        | Embolism and thrombosis of arteries of extremities, unspecified |                                             |                     |
| I74.5                                        | Embolism and thrombosis of iliac artery                         |                                             |                     |
| I74.8                                        | Embolism and thrombosis of other arteries                       |                                             |                     |
| I74.9                                        | Embolism and thrombosis of unspecified artery                   |                                             |                     |
| I76                                          | Septic arterial embolism                                        |                                             |                     |



### Included and Excluded ICD-10-CM Diagnosis Subcodes for Asthma Condition Group

| Included ICD-10-CM diagnosis subcodes (n=15) |                                                      | Excluded ICD-10-CM diagnosis subcodes (n=3) |                                         |
|----------------------------------------------|------------------------------------------------------|---------------------------------------------|-----------------------------------------|
| Subcode                                      | Subcode description                                  | Subcode                                     | Subcode description                     |
| J45.21                                       | Mild intermittent asthma with (acute) exacerbation   | J45.20                                      | Mild intermittent asthma, uncomplicated |
| J45.22                                       | Mild intermittent asthma with status asthmaticus     | J45.30                                      | Mild persistent asthma, uncomplicated   |
| J45.31                                       | Mild persistent asthma with (acute) exacerbation     | J45.991                                     | Cough variant asthma                    |
| J45.32                                       | Mild persistent asthma with status asthmaticus       |                                             |                                         |
| J45.40                                       | Moderate persistent asthma, uncomplicated            |                                             |                                         |
| J45.41                                       | Moderate persistent asthma with (acute) exacerbation |                                             |                                         |
| J45.42                                       | Moderate persistent asthma with status asthmaticus   |                                             |                                         |
| J45.50                                       | Severe persistent asthma, uncomplicated              |                                             |                                         |
| J45.51                                       | Severe persistent asthma with (acute) exacerbation   |                                             |                                         |
| J45.52                                       | Severe persistent asthma with status asthmaticus     |                                             |                                         |
| J45.901                                      | Unspecified asthma with (acute) exacerbation         |                                             |                                         |
| J45.902                                      | Unspecified asthma with status asthmaticus           |                                             |                                         |
| J45.909                                      | Unspecified asthma, uncomplicated                    |                                             |                                         |
| J45.990                                      | Exercise induced bronchospasm                        |                                             |                                         |
| J45.998                                      | Other asthma                                         |                                             |                                         |

**Included and Excluded ICD-10-CM Diagnosis Subcodes for Cardiac Arrest and Severe Arrhythmias Condition Group**

| <b>Included ICD-10-CM diagnosis subcodes (n=6)</b> |                                                    | <b>Excluded ICD-10-CM diagnosis subcodes (n=0)</b> |                            |
|----------------------------------------------------|----------------------------------------------------|----------------------------------------------------|----------------------------|
| <b>Subcode</b>                                     | <b>Subcode description</b>                         | <b>Subcode</b>                                     | <b>Subcode description</b> |
| I46.2                                              | Cardiac arrest due to underlying cardiac condition |                                                    |                            |
| I46.8                                              | Cardiac arrest due to other underlying condition   |                                                    |                            |
| I46.9                                              | Cardiac arrest, cause unspecified                  |                                                    |                            |
| I47.2                                              | Ventricular tachycardia                            |                                                    |                            |
| I49.01                                             | Ventricular fibrillation                           |                                                    |                            |
| I49.02                                             | Ventricular flutter                                |                                                    |                            |

### Included and Excluded ICD-10-CM Diagnosis Subcodes for Cerebral Infarction Condition Group

| Included ICD-10-CM diagnosis subcodes (n=72) |                                                                                                  | Excluded ICD-10-CM diagnosis subcodes (n=0) |                     |
|----------------------------------------------|--------------------------------------------------------------------------------------------------|---------------------------------------------|---------------------|
| Subcode                                      | Subcode description                                                                              | Subcode                                     | Subcode description |
| I63.00                                       | Cerebral infarction due to thrombosis of unspecified precerebral artery                          |                                             |                     |
| I63.011                                      | Cerebral infarction due to thrombosis of right vertebral artery                                  |                                             |                     |
| I63.012                                      | Cerebral infarction due to thrombosis of left vertebral artery                                   |                                             |                     |
| I63.019                                      | Cerebral infarction due to thrombosis of unspecified vertebral artery                            |                                             |                     |
| I63.02                                       | Cerebral infarction due to thrombosis of basilar artery                                          |                                             |                     |
| I63.031                                      | Cerebral infarction due to thrombosis of right carotid artery                                    |                                             |                     |
| I63.032                                      | Cerebral infarction due to thrombosis of left carotid artery                                     |                                             |                     |
| I63.039                                      | Cerebral infarction due to thrombosis of unspecified carotid artery                              |                                             |                     |
| I63.09                                       | Cerebral infarction due to thrombosis of other precerebral artery                                |                                             |                     |
| I63.10                                       | Cerebral infarction due to embolism of unspecified precerebral artery                            |                                             |                     |
| I63.111                                      | Cerebral infarction due to embolism of right vertebral artery                                    |                                             |                     |
| I63.112                                      | Cerebral infarction due to embolism of left vertebral artery                                     |                                             |                     |
| I63.119                                      | Cerebral infarction due to embolism of unspecified vertebral artery                              |                                             |                     |
| I63.12                                       | Cerebral infarction due to embolism of basilar artery                                            |                                             |                     |
| I63.131                                      | Cerebral infarction due to embolism of right carotid artery                                      |                                             |                     |
| I63.132                                      | Cerebral infarction due to embolism of left carotid artery                                       |                                             |                     |
| I63.139                                      | Cerebral infarction due to embolism of unspecified carotid artery                                |                                             |                     |
| I63.19                                       | Cerebral infarction due to embolism of other precerebral artery                                  |                                             |                     |
| I63.20                                       | Cerebral infarction due to unspecified occlusion or stenosis of unspecified precerebral arteries |                                             |                     |
| I63.211                                      | Cerebral infarction due to unspecified occlusion or stenosis of right vertebral arteries         |                                             |                     |

|         |                                                                                                |  |  |
|---------|------------------------------------------------------------------------------------------------|--|--|
| 163.212 | Cerebral infarction due to unspecified occlusion or stenosis of left vertebral arteries        |  |  |
| 163.219 | Cerebral infarction due to unspecified occlusion or stenosis of unspecified vertebral arteries |  |  |
| 163.22  | Cerebral infarction due to unspecified occlusion or stenosis of basilar arteries               |  |  |
| 163.231 | Cerebral infarction due to unspecified occlusion or stenosis of right carotid arteries         |  |  |
| 163.232 | Cerebral infarction due to unspecified occlusion or stenosis of left carotid arteries          |  |  |
| 163.239 | Cerebral infarction due to unspecified occlusion or stenosis of unspecified carotid arteries   |  |  |
| 163.29  | Cerebral infarction due to unspecified occlusion or stenosis of other precerebral arteries     |  |  |
| 163.30  | Cerebral infarction due to thrombosis of unspecified cerebral artery                           |  |  |
| 163.311 | Cerebral infarction due to thrombosis of right middle cerebral artery                          |  |  |
| 163.312 | Cerebral infarction due to thrombosis of left middle cerebral artery                           |  |  |
| 163.319 | Cerebral infarction due to thrombosis of unspecified middle cerebral artery                    |  |  |
| 163.321 | Cerebral infarction due to thrombosis of right anterior cerebral artery                        |  |  |
| 163.322 | Cerebral infarction due to thrombosis of left anterior cerebral artery                         |  |  |
| 163.329 | Cerebral infarction due to thrombosis of unspecified anterior cerebral artery                  |  |  |
| 163.331 | Cerebral infarction due to thrombosis of right posterior cerebral artery                       |  |  |
| 163.332 | Cerebral infarction due to thrombosis of left posterior cerebral artery                        |  |  |
| 163.339 | Cerebral infarction due to thrombosis of unspecified posterior cerebral artery                 |  |  |
| 163.341 | Cerebral infarction due to thrombosis of right cerebellar artery                               |  |  |
| 163.342 | Cerebral infarction due to thrombosis of left cerebellar artery                                |  |  |

|         |                                                                                              |  |  |
|---------|----------------------------------------------------------------------------------------------|--|--|
| 163.349 | Cerebral infarction due to thrombosis of unspecified cerebellar artery                       |  |  |
| 163.39  | Cerebral infarction due to thrombosis of other cerebral artery                               |  |  |
| 163.40  | Cerebral infarction due to embolism of unspecified cerebral artery                           |  |  |
| 163.411 | Cerebral infarction due to embolism of right middle cerebral artery                          |  |  |
| 163.412 | Cerebral infarction due to embolism of left middle cerebral artery                           |  |  |
| 163.419 | Cerebral infarction due to embolism of unspecified middle cerebral artery                    |  |  |
| 163.421 | Cerebral infarction due to embolism of right anterior cerebral artery                        |  |  |
| 163.422 | Cerebral infarction due to embolism of left anterior cerebral artery                         |  |  |
| 163.429 | Cerebral infarction due to embolism of unspecified anterior cerebral artery                  |  |  |
| 163.431 | Cerebral infarction due to embolism of right posterior cerebral artery                       |  |  |
| 163.432 | Cerebral infarction due to embolism of left posterior cerebral artery                        |  |  |
| 163.439 | Cerebral infarction due to embolism of unspecified posterior cerebral artery                 |  |  |
| 163.441 | Cerebral infarction due to embolism of right cerebellar artery                               |  |  |
| 163.442 | Cerebral infarction due to embolism of left cerebellar artery                                |  |  |
| 163.449 | Cerebral infarction due to embolism of unspecified cerebellar artery                         |  |  |
| 163.49  | Cerebral infarction due to embolism of other cerebral artery                                 |  |  |
| 163.50  | Cerebral infarction due to unspecified occlusion or stenosis of unspecified cerebral artery  |  |  |
| 163.511 | Cerebral infarction due to unspecified occlusion or stenosis of right middle cerebral artery |  |  |
| 163.512 | Cerebral infarction due to unspecified occlusion or stenosis of left middle cerebral artery  |  |  |

|         |                                                                                                       |  |  |
|---------|-------------------------------------------------------------------------------------------------------|--|--|
| 163.519 | Cerebral infarction due to unspecified occlusion or stenosis of unspecified middle cerebral artery    |  |  |
| 163.521 | Cerebral infarction due to unspecified occlusion or stenosis of right anterior cerebral artery        |  |  |
| 163.522 | Cerebral infarction due to unspecified occlusion or stenosis of left anterior cerebral artery         |  |  |
| 163.529 | Cerebral infarction due to unspecified occlusion or stenosis of unspecified anterior cerebral artery  |  |  |
| 163.531 | Cerebral infarction due to unspecified occlusion or stenosis of right posterior cerebral artery       |  |  |
| 163.532 | Cerebral infarction due to unspecified occlusion or stenosis of left posterior cerebral artery        |  |  |
| 163.539 | Cerebral infarction due to unspecified occlusion or stenosis of unspecified posterior cerebral artery |  |  |
| 163.541 | Cerebral infarction due to unspecified occlusion or stenosis of right cerebellar artery               |  |  |
| 163.542 | Cerebral infarction due to unspecified occlusion or stenosis of left cerebellar artery                |  |  |
| 163.549 | Cerebral infarction due to unspecified occlusion or stenosis of unspecified cerebellar artery         |  |  |
| 163.59  | Cerebral infarction due to unspecified occlusion or stenosis of other cerebral artery                 |  |  |
| 163.6   | Cerebral infarction due to cerebral venous thrombosis, nonpyogenic                                    |  |  |
| 163.8   | Other cerebral infarction                                                                             |  |  |
| 163.9   | Cerebral infarction, unspecified                                                                      |  |  |

**Included and Excluded ICD-10-CM Diagnosis Subcodes for Cholecystitis and Perforation of the Gallbladder Condition Group**

| Included ICD-10-CM diagnosis subcodes (n=4) |                                                | Excluded ICD-10-CM diagnosis subcodes (n=7) |                                         |
|---------------------------------------------|------------------------------------------------|---------------------------------------------|-----------------------------------------|
| Subcode                                     | Subcode description                            | Subcode                                     | Subcode description                     |
| K81.0                                       | Acute cholecystitis                            | K81.1                                       | Chronic cholecystitis                   |
| K81.2                                       | Acute cholecystitis with chronic cholecystitis | K82.0                                       | Obstruction of gallbladder              |
| K81.9                                       | Cholecystitis, unspecified                     | K82.1                                       | Hydrops of gallbladder                  |
| K82.2                                       | Perforation of gallbladder                     | K82.3                                       | Fistula of gallbladder                  |
|                                             |                                                | K82.4                                       | Cholesterolosis of gallbladder          |
|                                             |                                                | K82.8                                       | Other specified diseases of gallbladder |
|                                             |                                                | K82.9                                       | Disease of gallbladder, unspecified     |

**Included and Excluded ICD-10-CM Diagnosis Subcodes for Chronic Obstructive Pulmonary Disease Condition Group**

| Included ICD-10-CM diagnosis subcodes (n=3) |                                                                              | Excluded ICD-10-CM diagnosis subcodes (n=0) |                     |
|---------------------------------------------|------------------------------------------------------------------------------|---------------------------------------------|---------------------|
| Subcode                                     | Subcode description                                                          | Subcode                                     | Subcode description |
| J44.0                                       | Chronic obstructive pulmonary disease with acute lower respiratory infection |                                             |                     |
| J44.1                                       | Chronic obstructive pulmonary disease with (acute) exacerbation              |                                             |                     |
| J44.9                                       | Chronic obstructive pulmonary disease, unspecified                           |                                             |                     |

## Included and Excluded ICD-10-CM Diagnosis Subcodes for Complications of Cardiac and Vascular Prosthetic Devices/Grafts Condition Group

| Included ICD-10-CM diagnosis subcodes (n=95) |                                                                                       | Excluded ICD-10-CM diagnosis subcodes (n=2) |                                                                               |
|----------------------------------------------|---------------------------------------------------------------------------------------|---------------------------------------------|-------------------------------------------------------------------------------|
| Subcode                                      | Subcode description                                                                   | Subcode                                     | Subcode description                                                           |
| T82.01XA                                     | Breakdown (mechanical) of heart valve prosthesis, initial encounter                   | T82.847A                                    | Pain from cardiac prosthetic devices, implants and grafts, initial encounter  |
| T82.02XA                                     | Displacement of heart valve prosthesis, initial encounter                             | T82.848A                                    | Pain from vascular prosthetic devices, implants and grafts, initial encounter |
| T82.03XA                                     | Leakage of heart valve prosthesis, initial encounter                                  |                                             |                                                                               |
| T82.09XA                                     | Other mechanical complication of heart valve prosthesis, initial encounter            |                                             |                                                                               |
| T82.110A                                     | Breakdown (mechanical) of cardiac electrode, initial encounter                        |                                             |                                                                               |
| T82.111A                                     | Breakdown (mechanical) of cardiac pulse generator (battery), initial encounter        |                                             |                                                                               |
| T82.118A                                     | Breakdown (mechanical) of other cardiac electronic device, initial encounter          |                                             |                                                                               |
| T82.119A                                     | Breakdown (mechanical) of unspecified cardiac electronic device, initial encounter    |                                             |                                                                               |
| T82.120A                                     | Displacement of cardiac electrode, initial encounter                                  |                                             |                                                                               |
| T82.121A                                     | Displacement of cardiac pulse generator (battery), initial encounter                  |                                             |                                                                               |
| T82.128A                                     | Displacement of other cardiac electronic device, initial encounter                    |                                             |                                                                               |
| T82.129A                                     | Displacement of unspecified cardiac electronic device, initial encounter              |                                             |                                                                               |
| T82.190A                                     | Other mechanical complication of cardiac electrode, initial encounter                 |                                             |                                                                               |
| T82.191A                                     | Other mechanical complication of cardiac pulse generator (battery), initial encounter |                                             |                                                                               |
| T82.198A                                     | Other mechanical complication of other cardiac electronic device, initial encounter   |                                             |                                                                               |
| T82.199A                                     | Other mechanical complication of unspecified cardiac device, initial encounter        |                                             |                                                                               |
| T82.211A                                     | Breakdown (mechanical) of coronary artery bypass graft, initial encounter             |                                             |                                                                               |



|          |                                                                                       |  |  |
|----------|---------------------------------------------------------------------------------------|--|--|
| T82.212A | Displacement of coronary artery bypass graft, initial encounter                       |  |  |
| T82.213A | Leakage of coronary artery bypass graft, initial encounter                            |  |  |
| T82.218A | Other mechanical complication of coronary artery bypass graft, initial encounter      |  |  |
| T82.221A | Breakdown (mechanical) of biological heart valve graft, initial encounter             |  |  |
| T82.222A | Displacement of biological heart valve graft, initial encounter                       |  |  |
| T82.223A | Leakage of biological heart valve graft, initial encounter                            |  |  |
| T82.228A | Other mechanical complication of biological heart valve graft, initial encounter      |  |  |
| T82.310A | Breakdown (mechanical) of aortic (bifurcation) graft (replacement), initial encounter |  |  |
| T82.311A | Breakdown (mechanical) of carotid arterial graft (bypass), initial encounter          |  |  |
| T82.312A | Breakdown (mechanical) of femoral arterial graft (bypass), initial encounter          |  |  |
| T82.318A | Breakdown (mechanical) of other vascular grafts, initial encounter                    |  |  |
| T82.319A | Breakdown (mechanical) of unspecified vascular grafts, initial encounter              |  |  |
| T82.320A | Displacement of aortic (bifurcation) graft (replacement), initial encounter           |  |  |
| T82.321A | Displacement of carotid arterial graft (bypass), initial encounter                    |  |  |
| T82.322A | Displacement of femoral arterial graft (bypass), initial encounter                    |  |  |
| T82.328A | Displacement of other vascular grafts, initial encounter                              |  |  |
| T82.329A | Displacement of unspecified vascular grafts, initial encounter                        |  |  |
| T82.330A | Leakage of aortic (bifurcation) graft (replacement), initial encounter                |  |  |
| T82.331A | Leakage of carotid arterial graft (bypass), initial encounter                         |  |  |
| T82.332A | Leakage of femoral arterial graft (bypass), initial encounter                         |  |  |
| T82.338A | Leakage of other vascular grafts, initial encounter                                   |  |  |
| T82.339A | Leakage of unspecified vascular graft, initial encounter                              |  |  |

|          |                                                                                                    |  |  |
|----------|----------------------------------------------------------------------------------------------------|--|--|
| T82.390A | Other mechanical complication of aortic (bifurcation) graft (replacement), initial encounter       |  |  |
| T82.391A | Other mechanical complication of carotid arterial graft (bypass), initial encounter                |  |  |
| T82.392A | Other mechanical complication of femoral arterial graft (bypass), initial encounter                |  |  |
| T82.398A | Other mechanical complication of other vascular grafts, initial encounter                          |  |  |
| T82.399A | Other mechanical complication of unspecified vascular grafts, initial encounter                    |  |  |
| T82.41XA | Breakdown (mechanical) of vascular dialysis catheter, initial encounter                            |  |  |
| T82.42XA | Displacement of vascular dialysis catheter, initial encounter                                      |  |  |
| T82.43XA | Leakage of vascular dialysis catheter, initial encounter                                           |  |  |
| T82.49XA | Other complication of vascular dialysis catheter, initial encounter                                |  |  |
| T82.510A | Breakdown (mechanical) of surgically created arteriovenous fistula, initial encounter              |  |  |
| T82.511A | Breakdown (mechanical) of surgically created arteriovenous shunt, initial encounter                |  |  |
| T82.512A | Breakdown (mechanical) of artificial heart, initial encounter                                      |  |  |
| T82.513A | Breakdown (mechanical) of balloon (counterpulsation) device, initial encounter                     |  |  |
| T82.514A | Breakdown (mechanical) of infusion catheter, initial encounter                                     |  |  |
| T82.515A | Breakdown (mechanical) of umbrella device, initial encounter                                       |  |  |
| T82.518A | Breakdown (mechanical) of other cardiac and vascular devices and implants, initial encounter       |  |  |
| T82.519A | Breakdown (mechanical) of unspecified cardiac and vascular devices and implants, initial encounter |  |  |
| T82.520A | Displacement of surgically created arteriovenous fistula, initial encounter                        |  |  |
| T82.521A | Displacement of surgically created arteriovenous shunt, initial encounter                          |  |  |
| T82.522A | Displacement of artificial heart, initial encounter                                                |  |  |

|          |                                                                                                           |  |  |
|----------|-----------------------------------------------------------------------------------------------------------|--|--|
| T82.523A | Displacement of balloon (counterpulsation) device, initial encounter                                      |  |  |
| T82.524A | Displacement of infusion catheter, initial encounter                                                      |  |  |
| T82.525A | Displacement of umbrella device, initial encounter                                                        |  |  |
| T82.528A | Displacement of other cardiac and vascular devices and implants, initial encounter                        |  |  |
| T82.529A | Displacement of unspecified cardiac and vascular devices and implants, initial encounter                  |  |  |
| T82.530A | Leakage of surgically created arteriovenous fistula, initial encounter                                    |  |  |
| T82.531A | Leakage of surgically created arteriovenous shunt, initial encounter                                      |  |  |
| T82.532A | Leakage of artificial heart, initial encounter                                                            |  |  |
| T82.533A | Leakage of balloon (counterpulsation) device, initial encounter                                           |  |  |
| T82.534A | Leakage of infusion catheter, initial encounter                                                           |  |  |
| T82.535A | Leakage of umbrella device, initial encounter                                                             |  |  |
| T82.538A | Leakage of other cardiac and vascular devices and implants, initial encounter                             |  |  |
| T82.539A | Leakage of unspecified cardiac and vascular devices and implants, initial encounter                       |  |  |
| T82.590A | Other mechanical complication of surgically created arteriovenous fistula, initial encounter              |  |  |
| T82.591A | Other mechanical complication of surgically created arteriovenous shunt, initial encounter                |  |  |
| T82.592A | Other mechanical complication of artificial heart, initial encounter                                      |  |  |
| T82.593A | Other mechanical complication of balloon (counterpulsation) device, initial encounter                     |  |  |
| T82.594A | Other mechanical complication of infusion catheter, initial encounter                                     |  |  |
| T82.595A | Other mechanical complication of umbrella device, initial encounter                                       |  |  |
| T82.598A | Other mechanical complication of other cardiac and vascular devices and implants, initial encounter       |  |  |
| T82.599A | Other mechanical complication of unspecified cardiac and vascular devices and implants, initial encounter |  |  |
| T82.6XXA | Infection and inflammatory reaction due to cardiac valve prosthesis, initial encounter                    |  |  |

|          |                                                                                                                       |  |  |
|----------|-----------------------------------------------------------------------------------------------------------------------|--|--|
| T82.7XXA | Infection and inflammatory reaction due to other cardiac and vascular devices, implants and grafts, initial encounter |  |  |
| T82.817A | Embolism of cardiac prosthetic devices, implants and grafts, initial encounter                                        |  |  |
| T82.818A | Embolism of vascular prosthetic devices, implants and grafts, initial encounter                                       |  |  |
| T82.827A | Fibrosis of cardiac prosthetic devices, implants and grafts, initial encounter                                        |  |  |
| T82.828A | Fibrosis of vascular prosthetic devices, implants and grafts, initial encounter                                       |  |  |
| T82.837A | Hemorrhage of cardiac prosthetic devices, implants and grafts, initial encounter                                      |  |  |
| T82.838A | Hemorrhage of vascular prosthetic devices, implants and grafts, initial encounter                                     |  |  |
| T82.857A | Stenosis of cardiac prosthetic devices, implants and grafts, initial encounter                                        |  |  |
| T82.858A | Stenosis of vascular prosthetic devices, implants and grafts, initial encounter                                       |  |  |
| T82.867A | Thrombosis of cardiac prosthetic devices, implants and grafts, initial encounter                                      |  |  |
| T82.868A | Thrombosis of vascular prosthetic devices, implants and grafts, initial encounter                                     |  |  |
| T82.897A | Other specified complication of cardiac prosthetic devices, implants and grafts, initial encounter                    |  |  |
| T82.898A | Other specified complication of vascular prosthetic devices, implants and grafts, initial encounter                   |  |  |
| T82.9XXA | Unspecified complication of cardiac and vascular prosthetic device, implant and graft, initial encounter              |  |  |

### Included and Excluded ICD-10-CM Diagnosis Subcodes for Complications of Procedures Condition Group

| Included ICD-10-CM diagnosis subcodes (n=62) |                                                                                                                           | Excluded ICD-10-CM diagnosis subcodes (n=10) |                                                                                                                                    |
|----------------------------------------------|---------------------------------------------------------------------------------------------------------------------------|----------------------------------------------|------------------------------------------------------------------------------------------------------------------------------------|
| Subcode                                      | Subcode description                                                                                                       | Subcode                                      | Subcode description                                                                                                                |
| T81.10XA                                     | Postprocedural shock unspecified, initial encounter                                                                       | T81.510A                                     | Adhesions due to foreign body accidentally left in body following surgical operation, initial encounter                            |
| T81.11XA                                     | Postprocedural cardiogenic shock, initial encounter                                                                       | T81.511A                                     | Adhesions due to foreign body accidentally left in body following infusion or transfusion, initial encounter                       |
| T81.12XA                                     | Postprocedural septic shock, initial encounter                                                                            | T81.512A                                     | Adhesions due to foreign body accidentally left in body following kidney dialysis, initial encounter                               |
| T81.19XA                                     | Other postprocedural shock, initial encounter                                                                             | T81.513A                                     | Adhesions due to foreign body accidentally left in body following injection or immunization, initial encounter                     |
| T81.30XA                                     | Disruption of wound, unspecified, initial encounter                                                                       | T81.514A                                     | Adhesions due to foreign body accidentally left in body following endoscopic examination, initial encounter                        |
| T81.31XA                                     | Disruption of external operation (surgical) wound, not elsewhere classified, initial encounter                            | T81.515A                                     | Adhesions due to foreign body accidentally left in body following heart catheterization, initial encounter                         |
| T81.32XA                                     | Disruption of internal operation (surgical) wound, not elsewhere classified, initial encounter                            | T81.516A                                     | Adhesions due to foreign body accidentally left in body following aspiration, puncture or other catheterization, initial encounter |
| T81.33XA                                     | Disruption of traumatic injury wound repair, initial encounter                                                            | T81.517A                                     | Adhesions due to foreign body accidentally left in body following removal of catheter or packing, initial encounter                |
| T81.4XXA                                     | Infection following a procedure, initial encounter                                                                        | T81.518A                                     | Adhesions due to foreign body accidentally left in body following other procedure, initial encounter                               |
| T81.500A                                     | Unspecified complication of foreign body accidentally left in body following surgical operation, initial encounter        | T81.519A                                     | Adhesions due to foreign body accidentally left in body following unspecified procedure, initial encounter                         |
| T81.501A                                     | Unspecified complication of foreign body accidentally left in body following infusion or transfusion, initial encounter   |                                              |                                                                                                                                    |
| T81.502A                                     | Unspecified complication of foreign body accidentally left in body following kidney dialysis, initial encounter           |                                              |                                                                                                                                    |
| T81.503A                                     | Unspecified complication of foreign body accidentally left in body following injection or immunization, initial encounter |                                              |                                                                                                                                    |
| T81.504A                                     | Unspecified complication of foreign body accidentally left in body following endoscopic examination, initial encounter    |                                              |                                                                                                                                    |
| T81.505A                                     | Unspecified complication of foreign body accidentally left in body following heart catheterization, initial encounter     |                                              |                                                                                                                                    |

|          |                                                                                                                                               |  |  |
|----------|-----------------------------------------------------------------------------------------------------------------------------------------------|--|--|
| T81.506A | Unspecified complication of foreign body accidentally left in body following aspiration, puncture or other catheterization, initial encounter |  |  |
| T81.507A | Unspecified complication of foreign body accidentally left in body following removal of catheter or packing, initial encounter                |  |  |
| T81.508A | Unspecified complication of foreign body accidentally left in body following other procedure, initial encounter                               |  |  |
| T81.509A | Unspecified complication of foreign body accidentally left in body following unspecified procedure, initial encounter                         |  |  |
| T81.520A | Obstruction due to foreign body accidentally left in body following surgical operation, initial encounter                                     |  |  |
| T81.521A | Obstruction due to foreign body accidentally left in body following infusion or transfusion, initial encounter                                |  |  |
| T81.522A | Obstruction due to foreign body accidentally left in body following kidney dialysis, initial encounter                                        |  |  |
| T81.523A | Obstruction due to foreign body accidentally left in body following injection or immunization, initial encounter                              |  |  |
| T81.524A | Obstruction due to foreign body accidentally left in body following endoscopic examination, initial encounter                                 |  |  |
| T81.525A | Obstruction due to foreign body accidentally left in body following heart catheterization, initial encounter                                  |  |  |
| T81.526A | Obstruction due to foreign body accidentally left in body following aspiration, puncture or other catheterization, initial encounter          |  |  |
| T81.527A | Obstruction due to foreign body accidentally left in body following removal of catheter or packing, initial encounter                         |  |  |
| T81.528A | Obstruction due to foreign body accidentally left in body following other procedure, initial encounter                                        |  |  |
| T81.529A | Obstruction due to foreign body accidentally left in body following unspecified procedure, initial encounter                                  |  |  |
| T81.530A | Perforation due to foreign body accidentally left in body following surgical operation, initial encounter                                     |  |  |
| T81.531A | Perforation due to foreign body accidentally left in body following infusion or transfusion, initial encounter                                |  |  |
| T81.532A | Perforation due to foreign body accidentally left in body following kidney dialysis, initial encounter                                        |  |  |
| T81.533A | Perforation due to foreign body accidentally left in body following injection or immunization, initial encounter                              |  |  |

|          |                                                                                                                                          |  |  |
|----------|------------------------------------------------------------------------------------------------------------------------------------------|--|--|
| T81.534A | Perforation due to foreign body accidentally left in body following endoscopic examination, initial encounter                            |  |  |
| T81.535A | Perforation due to foreign body accidentally left in body following heart catheterization, initial encounter                             |  |  |
| T81.536A | Perforation due to foreign body accidentally left in body following aspiration, puncture or other catheterization, initial encounter     |  |  |
| T81.537A | Perforation due to foreign body accidentally left in body following removal of catheter or packing, initial encounter                    |  |  |
| T81.538A | Perforation due to foreign body accidentally left in body following other procedure, initial encounter                                   |  |  |
| T81.539A | Perforation due to foreign body accidentally left in body following unspecified procedure, initial encounter                             |  |  |
| T81.590A | Other complications of foreign body accidentally left in body following surgical operation, initial encounter                            |  |  |
| T81.591A | Other complications of foreign body accidentally left in body following infusion or transfusion, initial encounter                       |  |  |
| T81.592A | Other complications of foreign body accidentally left in body following kidney dialysis, initial encounter                               |  |  |
| T81.593A | Other complications of foreign body accidentally left in body following injection or immunization, initial encounter                     |  |  |
| T81.594A | Other complications of foreign body accidentally left in body following endoscopic examination, initial encounter                        |  |  |
| T81.595A | Other complications of foreign body accidentally left in body following heart catheterization, initial encounter                         |  |  |
| T81.596A | Other complications of foreign body accidentally left in body following aspiration, puncture or other catheterization, initial encounter |  |  |
| T81.597A | Other complications of foreign body accidentally left in body following removal of catheter or packing, initial encounter                |  |  |
| T81.598A | Other complications of foreign body accidentally left in body following other procedure, initial encounter                               |  |  |
| T81.599A | Other complications of foreign body accidentally left in body following unspecified procedure, initial encounter                         |  |  |
| T81.60XA | Unspecified acute reaction to foreign substance accidentally left during a procedure, initial encounter                                  |  |  |
| T81.61XA | Aseptic peritonitis due to foreign substance accidentally left during a procedure, initial encounter                                     |  |  |

|          |                                                                                                       |  |  |
|----------|-------------------------------------------------------------------------------------------------------|--|--|
| T81.69XA | Other acute reaction to foreign substance accidentally left during a procedure, initial encounter     |  |  |
| T81.710A | Complication of mesenteric artery following a procedure, not elsewhere classified, initial encounter  |  |  |
| T81.711A | Complication of renal artery following a procedure, not elsewhere classified, initial encounter       |  |  |
| T81.718A | Complication of other artery following a procedure, not elsewhere classified, initial encounter       |  |  |
| T81.719A | Complication of unspecified artery following a procedure, not elsewhere classified, initial encounter |  |  |
| T81.72XA | Complication of vein following a procedure, not elsewhere classified, initial encounter               |  |  |
| T81.81XA | Complication of inhalation therapy, initial encounter                                                 |  |  |
| T81.82XA | Emphysema (subcutaneous) resulting from a procedure, initial encounter                                |  |  |
| T81.83XA | Persistent postprocedural fistula, initial encounter                                                  |  |  |
| T81.89XA | Other complications of procedures, not elsewhere classified, initial encounter                        |  |  |
| T81.9XXA | Unspecified complication of procedure, initial encounter                                              |  |  |



### Included and Excluded ICD-10-CM Diagnosis Subcodes for Diabetes Mellitus-Acute Condition Group

| Included ICD-10-CM diagnosis subcodes (n=20) |                                                                                                          | Excluded ICD-10-CM diagnosis subcodes (n=0) |                     |
|----------------------------------------------|----------------------------------------------------------------------------------------------------------|---------------------------------------------|---------------------|
| Subcode                                      | Subcode description                                                                                      | Subcode                                     | Subcode description |
| E10.10                                       | Type 1 diabetes mellitus with ketoacidosis without coma                                                  |                                             |                     |
| E10.11                                       | Type 1 diabetes mellitus with ketoacidosis with coma                                                     |                                             |                     |
| E10.49                                       | Type 1 diabetes mellitus with other diabetic neurological complication                                   |                                             |                     |
| E10.52                                       | Type 1 diabetes mellitus with diabetic peripheral angiopathy with gangrene                               |                                             |                     |
| E10.59                                       | Type 1 diabetes mellitus with other circulatory complications                                            |                                             |                     |
| E10.621                                      | Type 1 diabetes mellitus with foot ulcer                                                                 |                                             |                     |
| E10.641                                      | Type 1 diabetes mellitus with hypoglycemia with coma                                                     |                                             |                     |
| E10.649                                      | Type 1 diabetes mellitus with hypoglycemia without coma                                                  |                                             |                     |
| E10.65                                       | Type 1 diabetes mellitus with hyperglycemia                                                              |                                             |                     |
| E10.69                                       | Type 1 diabetes mellitus with other specified complication                                               |                                             |                     |
| E11.00                                       | Type 2 diabetes mellitus with hyperosmolarity without nonketotic hyperglycemic-hyperosmolar coma (NKHHC) |                                             |                     |
| E11.01                                       | Type 2 diabetes mellitus with hyperosmolarity with coma                                                  |                                             |                     |
| E11.49                                       | Type 2 diabetes mellitus with other diabetic neurological complication                                   |                                             |                     |
| E11.52                                       | Type 2 diabetes mellitus with diabetic peripheral angiopathy with gangrene                               |                                             |                     |
| E11.59                                       | Type 2 diabetes mellitus with other circulatory complications                                            |                                             |                     |
| E11.621                                      | Type 2 diabetes mellitus with foot ulcer                                                                 |                                             |                     |
| E11.641                                      | Type 2 diabetes mellitus with hypoglycemia with coma                                                     |                                             |                     |
| E11.649                                      | Type 2 diabetes mellitus with hypoglycemia without coma                                                  |                                             |                     |
| E11.65                                       | Type 2 diabetes mellitus with hyperglycemia                                                              |                                             |                     |
| E11.69                                       | Type 2 diabetes mellitus with other specified complication                                               |                                             |                     |

### Included and Excluded ICD-10-CM Diagnosis Subcodes for Disorders of the Brain Condition Group

| Included ICD-10-CM diagnosis subcodes (n=14) |                                                                                     | Excluded ICD-10-CM diagnosis subcodes (n=5) |                            |
|----------------------------------------------|-------------------------------------------------------------------------------------|---------------------------------------------|----------------------------|
| Subcode                                      | Subcode description                                                                 | Subcode                                     | Subcode description        |
| G06.0                                        | Intracranial abscess and granuloma                                                  | G93.0                                       | Cerebral cysts             |
| G06.1                                        | Intraspinal abscess and granuloma                                                   | G93.3                                       | Postviral fatigue syndrome |
| G06.2                                        | Extradural and subdural abscess, unspecified                                        | G93.7                                       | Reye's syndrome            |
| G07.                                         | Intracranial and intraspinal abscess and granuloma in diseases classified elsewhere | G93.81                                      | Temporal sclerosis         |
| G92.                                         | Toxic encephalopathy                                                                | G93.82                                      | Brain death                |
| G93.1                                        | Anoxic brain damage, not elsewhere classified                                       |                                             |                            |
| G93.2                                        | Benign intracranial hypertension                                                    |                                             |                            |
| G93.40                                       | Encephalopathy, unspecified                                                         |                                             |                            |
| G93.41                                       | Metabolic encephalopathy                                                            |                                             |                            |
| G93.49                                       | Other encephalopathy                                                                |                                             |                            |
| G93.5                                        | Compression of brain                                                                |                                             |                            |
| G93.6                                        | Cerebral edema                                                                      |                                             |                            |
| G93.89                                       | Other specified disorders of brain                                                  |                                             |                            |
| G93.9                                        | Disorder of brain, unspecified                                                      |                                             |                            |

### Included and Excluded ICD-10-CM Diagnosis Subcodes for Early Complications of Trauma Condition Group

| Included ICD-10-CM diagnosis subcodes (n=18) |                                                                                  | Excluded ICD-10-CM diagnosis subcodes (n=0) |                     |
|----------------------------------------------|----------------------------------------------------------------------------------|---------------------------------------------|---------------------|
| Subcode                                      | Subcode description                                                              | Subcode                                     | Subcode description |
| T79.0XXA                                     | Air embolism (traumatic), initial encounter                                      |                                             |                     |
| T79.1XXA                                     | Fat embolism (traumatic), initial encounter                                      |                                             |                     |
| T79.2XXA                                     | Traumatic secondary and recurrent hemorrhage and seroma, initial encounter       |                                             |                     |
| T79.4XXA                                     | Traumatic shock, initial encounter                                               |                                             |                     |
| T79.5XXA                                     | Traumatic anuria, initial encounter                                              |                                             |                     |
| T79.6XXA                                     | Traumatic ischemia of muscle, initial encounter                                  |                                             |                     |
| T79.7XXA                                     | Traumatic subcutaneous emphysema, initial encounter                              |                                             |                     |
| T79.8XXA                                     | Other early complications of trauma, initial encounter                           |                                             |                     |
| T79.9XXA                                     | Unspecified early complication of trauma, initial encounter                      |                                             |                     |
| T79.A0XA                                     | Compartment syndrome, unspecified, initial encounter                             |                                             |                     |
| T79.A11A                                     | Traumatic compartment syndrome of right upper extremity, initial encounter       |                                             |                     |
| T79.A12A                                     | Traumatic compartment syndrome of left upper extremity, initial encounter        |                                             |                     |
| T79.A19A                                     | Traumatic compartment syndrome of unspecified upper extremity, initial encounter |                                             |                     |
| T79.A21A                                     | Traumatic compartment syndrome of right lower extremity, initial encounter       |                                             |                     |
| T79.A22A                                     | Traumatic compartment syndrome of left lower extremity, initial encounter        |                                             |                     |
| T79.A29A                                     | Traumatic compartment syndrome of unspecified lower extremity, initial encounter |                                             |                     |
| T79.A3XA                                     | Traumatic compartment syndrome of abdomen, initial encounter                     |                                             |                     |
| T79.A9XA                                     | Traumatic compartment syndrome of other sites, initial encounter                 |                                             |                     |

### Included and Excluded ICD-10-CM Diagnosis Subcodes for Ectopic Pregnancy Condition Group

| Included ICD-10-CM diagnosis subcodes (n=5) |                                | Excluded ICD-10-CM diagnosis subcodes (n=0) |                     |
|---------------------------------------------|--------------------------------|---------------------------------------------|---------------------|
| Subcode                                     | Subcode description            | Subcode                                     | Subcode description |
| O00.0                                       | Abdominal pregnancy            |                                             |                     |
| O00.1                                       | Tubal pregnancy                |                                             |                     |
| O00.2                                       | Ovarian pregnancy              |                                             |                     |
| O00.8                                       | Other ectopic pregnancy        |                                             |                     |
| O00.9                                       | Ectopic pregnancy, unspecified |                                             |                     |

## Included and Excluded ICD-10-CM Diagnosis Subcodes for Encephalitis, Myelitis and Encephalomyelitis Condition Group

| Included ICD-10-CM diagnosis subcodes (n=18) |                                                                                            | Excluded ICD-10-CM diagnosis subcodes (n=0) |                     |
|----------------------------------------------|--------------------------------------------------------------------------------------------|---------------------------------------------|---------------------|
| Subcode                                      | Subcode description                                                                        | Subcode                                     | Subcode description |
| A32.12                                       | Listerial meningoencephalitis                                                              |                                             |                     |
| A39.81                                       | Meningococcal encephalitis                                                                 |                                             |                     |
| A42.82                                       | Actinomycotic encephalitis                                                                 |                                             |                     |
| G04.00                                       | Acute disseminated encephalitis and encephalomyelitis, unspecified                         |                                             |                     |
| G04.01                                       | Postinfectious acute disseminated encephalitis and encephalomyelitis (postinfectious ADEM) |                                             |                     |
| G04.02                                       | Postimmunization acute disseminated encephalitis, myelitis and encephalomyelitis           |                                             |                     |
| G04.1                                        | Tropical spastic paraplegia                                                                |                                             |                     |
| G04.2                                        | Bacterial meningoencephalitis and meningomyelitis, not elsewhere classified                |                                             |                     |
| G04.30                                       | Acute necrotizing hemorrhagic encephalopathy, unspecified                                  |                                             |                     |
| G04.31                                       | Postinfectious acute necrotizing hemorrhagic encephalopathy                                |                                             |                     |
| G04.32                                       | Postimmunization acute necrotizing hemorrhagic encephalopathy                              |                                             |                     |
| G04.39                                       | Other acute necrotizing hemorrhagic encephalopathy                                         |                                             |                     |
| G04.81                                       | Other encephalitis and encephalomyelitis                                                   |                                             |                     |
| G04.89                                       | Other myelitis                                                                             |                                             |                     |
| G04.90                                       | Encephalitis and encephalomyelitis, unspecified                                            |                                             |                     |
| G04.91                                       | Myelitis, unspecified                                                                      |                                             |                     |
| G05.3                                        | Encephalitis and encephalomyelitis in diseases classified elsewhere                        |                                             |                     |
| G05.4                                        | Myelitis in diseases classified elsewhere                                                  |                                             |                     |

### Included and Excluded ICD-10-CM Diagnosis Subcodes for Environmental Exposures Condition Group

| Included ICD-10-CM diagnosis subcodes (n=6) |                                                          | Excluded ICD-10-CM diagnosis subcodes (n=5) |                                                          |
|---------------------------------------------|----------------------------------------------------------|---------------------------------------------|----------------------------------------------------------|
| Subcode                                     | Subcode description                                      | Subcode                                     | Subcode description                                      |
| T67.0XXA                                    | Heatstroke and sunstroke, initial encounter              | T67.2XXA                                    | Heat cramp, initial encounter                            |
| T67.1XXA                                    | Heat syncope, initial encounter                          | T67.6XXA                                    | Heat fatigue, transient, initial encounter               |
| T67.3XXA                                    | Heat exhaustion, anhydrotic, initial encounter           | T67.7XXA                                    | Heat edema, initial encounter                            |
| T67.4XXA                                    | Heat exhaustion due to salt depletion, initial encounter | T67.8XXA                                    | Other effects of heat and light, initial encounter       |
| T67.5XXA                                    | Heat exhaustion, unspecified, initial encounter          | T67.9XXA                                    | Effect of heat and light, unspecified, initial encounter |
| T68.XXXA                                    | Hypothermia, initial encounter                           |                                             |                                                          |

### Included and Excluded ICD-10-CM Diagnosis Subcodes for Femur Fracture Condition Group

| Included ICD-10-CM diagnosis subcodes (n=462) |                                                                                                                         | Excluded ICD-10-CM diagnosis subcodes (n=0) |                     |
|-----------------------------------------------|-------------------------------------------------------------------------------------------------------------------------|---------------------------------------------|---------------------|
| Subcode                                       | Subcode description                                                                                                     | Subcode                                     | Subcode description |
| S72.001A                                      | Fracture of unspecified part of neck of right femur, initial encounter for closed fracture                              |                                             |                     |
| S72.001B                                      | Fracture of unspecified part of neck of right femur, initial encounter for open fracture type I or II                   |                                             |                     |
| S72.001C                                      | Fracture of unspecified part of neck of right femur, initial encounter for open fracture type IIIA, IIIB, or IIIC       |                                             |                     |
| S72.002A                                      | Fracture of unspecified part of neck of left femur, initial encounter for closed fracture                               |                                             |                     |
| S72.002B                                      | Fracture of unspecified part of neck of left femur, initial encounter for open fracture type I or II                    |                                             |                     |
| S72.002C                                      | Fracture of unspecified part of neck of left femur, initial encounter for open fracture type IIIA, IIIB, or IIIC        |                                             |                     |
| S72.009A                                      | Fracture of unspecified part of neck of unspecified femur, initial encounter for closed fracture                        |                                             |                     |
| S72.009B                                      | Fracture of unspecified part of neck of unspecified femur, initial encounter for open fracture type I or II             |                                             |                     |
| S72.009C                                      | Fracture of unspecified part of neck of unspecified femur, initial encounter for open fracture type IIIA, IIIB, or IIIC |                                             |                     |
| S72.011A                                      | Unspecified intracapsular fracture of right femur, initial encounter for closed fracture                                |                                             |                     |
| S72.011B                                      | Unspecified intracapsular fracture of right femur, initial encounter for open fracture type I or II                     |                                             |                     |
| S72.011C                                      | Unspecified intracapsular fracture of right femur, initial encounter for open fracture type IIIA, IIIB, or IIIC         |                                             |                     |
| S72.012A                                      | Unspecified intracapsular fracture of left femur, initial encounter for closed fracture                                 |                                             |                     |
| S72.012B                                      | Unspecified intracapsular fracture of left femur, initial encounter for open fracture type I or II                      |                                             |                     |
| S72.012C                                      | Unspecified intracapsular fracture of left femur, initial encounter for open fracture type IIIA, IIIB, or IIIC          |                                             |                     |
| S72.019A                                      | Unspecified intracapsular fracture of unspecified femur, initial encounter for closed fracture                          |                                             |                     |
| S72.019B                                      | Unspecified intracapsular fracture of unspecified femur, initial encounter for open fracture type I or II               |                                             |                     |

|          |                                                                                                                                         |  |  |
|----------|-----------------------------------------------------------------------------------------------------------------------------------------|--|--|
| S72.019C | Unspecified intracapsular fracture of unspecified femur, initial encounter for open fracture type IIIA, IIIB, or IIIC                   |  |  |
| S72.021A | Displaced fracture of epiphysis (separation) (upper) of right femur, initial encounter for closed fracture                              |  |  |
| S72.021B | Displaced fracture of epiphysis (separation) (upper) of right femur, initial encounter for open fracture type I or II                   |  |  |
| S72.021C | Displaced fracture of epiphysis (separation) (upper) of right femur, initial encounter for open fracture type IIIA, IIIB, or IIIC       |  |  |
| S72.022A | Displaced fracture of epiphysis (separation) (upper) of left femur, initial encounter for closed fracture                               |  |  |
| S72.022B | Displaced fracture of epiphysis (separation) (upper) of left femur, initial encounter for open fracture type I or II                    |  |  |
| S72.022C | Displaced fracture of epiphysis (separation) (upper) of left femur, initial encounter for open fracture type IIIA, IIIB, or IIIC        |  |  |
| S72.023A | Displaced fracture of epiphysis (separation) (upper) of unspecified femur, initial encounter for closed fracture                        |  |  |
| S72.023B | Displaced fracture of epiphysis (separation) (upper) of unspecified femur, initial encounter for open fracture type I or II             |  |  |
| S72.023C | Displaced fracture of epiphysis (separation) (upper) of unspecified femur, initial encounter for open fracture type IIIA, IIIB, or IIIC |  |  |
| S72.024A | Nondisplaced fracture of epiphysis (separation) (upper) of right femur, initial encounter for closed fracture                           |  |  |
| S72.024B | Nondisplaced fracture of epiphysis (separation) (upper) of right femur, initial encounter for open fracture type I or II                |  |  |
| S72.024C | Nondisplaced fracture of epiphysis (separation) (upper) of right femur, initial encounter for open fracture type IIIA, IIIB, or IIIC    |  |  |
| S72.025A | Nondisplaced fracture of epiphysis (separation) (upper) of left femur, initial encounter for closed fracture                            |  |  |
| S72.025B | Nondisplaced fracture of epiphysis (separation) (upper) of left femur, initial encounter for open fracture type I or II                 |  |  |
| S72.025C | Nondisplaced fracture of epiphysis (separation) (upper) of left femur, initial encounter for open fracture type IIIA, IIIB, or IIIC     |  |  |



|          |                                                                                                                                            |  |  |
|----------|--------------------------------------------------------------------------------------------------------------------------------------------|--|--|
| S72.026A | Nondisplaced fracture of epiphysis (separation) (upper) of unspecified femur, initial encounter for closed fracture                        |  |  |
| S72.026B | Nondisplaced fracture of epiphysis (separation) (upper) of unspecified femur, initial encounter for open fracture type I or II             |  |  |
| S72.026C | Nondisplaced fracture of epiphysis (separation) (upper) of unspecified femur, initial encounter for open fracture type IIIA, IIIB, or IIIC |  |  |
| S72.031A | Displaced midcervical fracture of right femur, initial encounter for closed fracture                                                       |  |  |
| S72.031B | Displaced midcervical fracture of right femur, initial encounter for open fracture type I or II                                            |  |  |
| S72.031C | Displaced midcervical fracture of right femur, initial encounter for open fracture type IIIA, IIIB, or IIIC                                |  |  |
| S72.032A | Displaced midcervical fracture of left femur, initial encounter for closed fracture                                                        |  |  |
| S72.032B | Displaced midcervical fracture of left femur, initial encounter for open fracture type I or II                                             |  |  |
| S72.032C | Displaced midcervical fracture of left femur, initial encounter for open fracture type IIIA, IIIB, or IIIC                                 |  |  |
| S72.033A | Displaced midcervical fracture of unspecified femur, initial encounter for closed fracture                                                 |  |  |
| S72.033B | Displaced midcervical fracture of unspecified femur, initial encounter for open fracture type I or II                                      |  |  |
| S72.033C | Displaced midcervical fracture of unspecified femur, initial encounter for open fracture type IIIA, IIIB, or IIIC                          |  |  |
| S72.034A | Nondisplaced midcervical fracture of right femur, initial encounter for closed fracture                                                    |  |  |
| S72.034B | Nondisplaced midcervical fracture of right femur, initial encounter for open fracture type I or II                                         |  |  |
| S72.034C | Nondisplaced midcervical fracture of right femur, initial encounter for open fracture type IIIA, IIIB, or IIIC                             |  |  |
| S72.035A | Nondisplaced midcervical fracture of left femur, initial encounter for closed fracture                                                     |  |  |
| S72.035B | Nondisplaced midcervical fracture of left femur, initial encounter for open fracture type I or II                                          |  |  |
| S72.035C | Nondisplaced midcervical fracture of left femur, initial encounter for open fracture type IIIA, IIIB, or IIIC                              |  |  |

|          |                                                                                                                       |  |  |
|----------|-----------------------------------------------------------------------------------------------------------------------|--|--|
| S72.036A | Nondisplaced midcervical fracture of unspecified femur, initial encounter for closed fracture                         |  |  |
| S72.036B | Nondisplaced midcervical fracture of unspecified femur, initial encounter for open fracture type I or II              |  |  |
| S72.036C | Nondisplaced midcervical fracture of unspecified femur, initial encounter for open fracture type IIIA, IIIB, or IIIC  |  |  |
| S72.041A | Displaced fracture of base of neck of right femur, initial encounter for closed fracture                              |  |  |
| S72.041B | Displaced fracture of base of neck of right femur, initial encounter for open fracture type I or II                   |  |  |
| S72.041C | Displaced fracture of base of neck of right femur, initial encounter for open fracture type IIIA, IIIB, or IIIC       |  |  |
| S72.042A | Displaced fracture of base of neck of left femur, initial encounter for closed fracture                               |  |  |
| S72.042B | Displaced fracture of base of neck of left femur, initial encounter for open fracture type I or II                    |  |  |
| S72.042C | Displaced fracture of base of neck of left femur, initial encounter for open fracture type IIIA, IIIB, or IIIC        |  |  |
| S72.043A | Displaced fracture of base of neck of unspecified femur, initial encounter for closed fracture                        |  |  |
| S72.043B | Displaced fracture of base of neck of unspecified femur, initial encounter for open fracture type I or II             |  |  |
| S72.043C | Displaced fracture of base of neck of unspecified femur, initial encounter for open fracture type IIIA, IIIB, or IIIC |  |  |
| S72.044A | Nondisplaced fracture of base of neck of right femur, initial encounter for closed fracture                           |  |  |
| S72.044B | Nondisplaced fracture of base of neck of right femur, initial encounter for open fracture type I or II                |  |  |
| S72.044C | Nondisplaced fracture of base of neck of right femur, initial encounter for open fracture type IIIA, IIIB, or IIIC    |  |  |
| S72.045A | Nondisplaced fracture of base of neck of left femur, initial encounter for closed fracture                            |  |  |
| S72.045B | Nondisplaced fracture of base of neck of left femur, initial encounter for open fracture type I or II                 |  |  |
| S72.045C | Nondisplaced fracture of base of neck of left femur, initial encounter for open fracture type IIIA, IIIB, or IIIC     |  |  |
| S72.046A | Nondisplaced fracture of base of neck of unspecified femur, initial encounter for closed fracture                     |  |  |

|          |                                                                                                                          |  |  |
|----------|--------------------------------------------------------------------------------------------------------------------------|--|--|
| S72.046B | Nondisplaced fracture of base of neck of unspecified femur, initial encounter for open fracture type I or II             |  |  |
| S72.046C | Nondisplaced fracture of base of neck of unspecified femur, initial encounter for open fracture type IIIA, IIIB, or IIIC |  |  |
| S72.051A | Unspecified fracture of head of right femur, initial encounter for closed fracture                                       |  |  |
| S72.051B | Unspecified fracture of head of right femur, initial encounter for open fracture type I or II                            |  |  |
| S72.051C | Unspecified fracture of head of right femur, initial encounter for open fracture type IIIA, IIIB, or IIIC                |  |  |
| S72.052A | Unspecified fracture of head of left femur, initial encounter for closed fracture                                        |  |  |
| S72.052B | Unspecified fracture of head of left femur, initial encounter for open fracture type I or II                             |  |  |
| S72.052C | Unspecified fracture of head of left femur, initial encounter for open fracture type IIIA, IIIB, or IIIC                 |  |  |
| S72.059A | Unspecified fracture of head of unspecified femur, initial encounter for closed fracture                                 |  |  |
| S72.059B | Unspecified fracture of head of unspecified femur, initial encounter for open fracture type I or II                      |  |  |
| S72.059C | Unspecified fracture of head of unspecified femur, initial encounter for open fracture type IIIA, IIIB, or IIIC          |  |  |
| S72.061A | Displaced articular fracture of head of right femur, initial encounter for closed fracture                               |  |  |
| S72.061B | Displaced articular fracture of head of right femur, initial encounter for open fracture type I or II                    |  |  |
| S72.061C | Displaced articular fracture of head of right femur, initial encounter for open fracture type IIIA, IIIB, or IIIC        |  |  |
| S72.062A | Displaced articular fracture of head of left femur, initial encounter for closed fracture                                |  |  |
| S72.062B | Displaced articular fracture of head of left femur, initial encounter for open fracture type I or II                     |  |  |
| S72.062C | Displaced articular fracture of head of left femur, initial encounter for open fracture type IIIA, IIIB, or IIIC         |  |  |
| S72.063A | Displaced articular fracture of head of unspecified femur, initial encounter for closed fracture                         |  |  |
| S72.063B | Displaced articular fracture of head of unspecified femur, initial encounter for open fracture type I or II              |  |  |

|          |                                                                                                                            |  |  |
|----------|----------------------------------------------------------------------------------------------------------------------------|--|--|
| S72.063C | Displaced articular fracture of head of unspecified femur, initial encounter for open fracture type IIIA, IIIB, or IIIC    |  |  |
| S72.064A | Nondisplaced articular fracture of head of right femur, initial encounter for closed fracture                              |  |  |
| S72.064B | Nondisplaced articular fracture of head of right femur, initial encounter for open fracture type I or II                   |  |  |
| S72.064C | Nondisplaced articular fracture of head of right femur, initial encounter for open fracture type IIIA, IIIB, or IIIC       |  |  |
| S72.065A | Nondisplaced articular fracture of head of left femur, initial encounter for closed fracture                               |  |  |
| S72.065B | Nondisplaced articular fracture of head of left femur, initial encounter for open fracture type I or II                    |  |  |
| S72.065C | Nondisplaced articular fracture of head of left femur, initial encounter for open fracture type IIIA, IIIB, or IIIC        |  |  |
| S72.066A | Nondisplaced articular fracture of head of unspecified femur, initial encounter for closed fracture                        |  |  |
| S72.066B | Nondisplaced articular fracture of head of unspecified femur, initial encounter for open fracture type I or II             |  |  |
| S72.066C | Nondisplaced articular fracture of head of unspecified femur, initial encounter for open fracture type IIIA, IIIB, or IIIC |  |  |
| S72.091A | Other fracture of head and neck of right femur, initial encounter for closed fracture                                      |  |  |
| S72.091B | Other fracture of head and neck of right femur, initial encounter for open fracture type I or II                           |  |  |
| S72.091C | Other fracture of head and neck of right femur, initial encounter for open fracture type IIIA, IIIB, or IIIC               |  |  |
| S72.092A | Other fracture of head and neck of left femur, initial encounter for closed fracture                                       |  |  |
| S72.092B | Other fracture of head and neck of left femur, initial encounter for open fracture type I or II                            |  |  |
| S72.092C | Other fracture of head and neck of left femur, initial encounter for open fracture type IIIA, IIIB, or IIIC                |  |  |
| S72.099A | Other fracture of head and neck of unspecified femur, initial encounter for closed fracture                                |  |  |
| S72.099B | Other fracture of head and neck of unspecified femur, initial encounter for open fracture type I or II                     |  |  |
| S72.099C | Other fracture of head and neck of unspecified femur, initial encounter for open fracture type IIIA, IIIB, or IIIC         |  |  |

|          |                                                                                                                             |  |  |
|----------|-----------------------------------------------------------------------------------------------------------------------------|--|--|
| S72.101A | Unspecified trochanteric fracture of right femur, initial encounter for closed fracture                                     |  |  |
| S72.101B | Unspecified trochanteric fracture of right femur, initial encounter for open fracture type I or II                          |  |  |
| S72.101C | Unspecified trochanteric fracture of right femur, initial encounter for open fracture type IIIA, IIIB, or IIIC              |  |  |
| S72.102A | Unspecified trochanteric fracture of left femur, initial encounter for closed fracture                                      |  |  |
| S72.102B | Unspecified trochanteric fracture of left femur, initial encounter for open fracture type I or II                           |  |  |
| S72.102C | Unspecified trochanteric fracture of left femur, initial encounter for open fracture type IIIA, IIIB, or IIIC               |  |  |
| S72.109A | Unspecified trochanteric fracture of unspecified femur, initial encounter for closed fracture                               |  |  |
| S72.109B | Unspecified trochanteric fracture of unspecified femur, initial encounter for open fracture type I or II                    |  |  |
| S72.109C | Unspecified trochanteric fracture of unspecified femur, initial encounter for open fracture type IIIA, IIIB, or IIIC        |  |  |
| S72.111A | Displaced fracture of greater trochanter of right femur, initial encounter for closed fracture                              |  |  |
| S72.111B | Displaced fracture of greater trochanter of right femur, initial encounter for open fracture type I or II                   |  |  |
| S72.111C | Displaced fracture of greater trochanter of right femur, initial encounter for open fracture type IIIA, IIIB, or IIIC       |  |  |
| S72.112A | Displaced fracture of greater trochanter of left femur, initial encounter for closed fracture                               |  |  |
| S72.112B | Displaced fracture of greater trochanter of left femur, initial encounter for open fracture type I or II                    |  |  |
| S72.112C | Displaced fracture of greater trochanter of left femur, initial encounter for open fracture type IIIA, IIIB, or IIIC        |  |  |
| S72.113A | Displaced fracture of greater trochanter of unspecified femur, initial encounter for closed fracture                        |  |  |
| S72.113B | Displaced fracture of greater trochanter of unspecified femur, initial encounter for open fracture type I or II             |  |  |
| S72.113C | Displaced fracture of greater trochanter of unspecified femur, initial encounter for open fracture type IIIA, IIIB, or IIIC |  |  |
| S72.114A | Nondisplaced fracture of greater trochanter of right femur, initial encounter for closed fracture                           |  |  |

|          |                                                                                                                                |  |  |
|----------|--------------------------------------------------------------------------------------------------------------------------------|--|--|
| S72.114B | Nondisplaced fracture of greater trochanter of right femur, initial encounter for open fracture type I or II                   |  |  |
| S72.114C | Nondisplaced fracture of greater trochanter of right femur, initial encounter for open fracture type IIIA, IIIB, or IIIC       |  |  |
| S72.115A | Nondisplaced fracture of greater trochanter of left femur, initial encounter for closed fracture                               |  |  |
| S72.115B | Nondisplaced fracture of greater trochanter of left femur, initial encounter for open fracture type I or II                    |  |  |
| S72.115C | Nondisplaced fracture of greater trochanter of left femur, initial encounter for open fracture type IIIA, IIIB, or IIIC        |  |  |
| S72.116A | Nondisplaced fracture of greater trochanter of unspecified femur, initial encounter for closed fracture                        |  |  |
| S72.116B | Nondisplaced fracture of greater trochanter of unspecified femur, initial encounter for open fracture type I or II             |  |  |
| S72.116C | Nondisplaced fracture of greater trochanter of unspecified femur, initial encounter for open fracture type IIIA, IIIB, or IIIC |  |  |
| S72.121A | Displaced fracture of lesser trochanter of right femur, initial encounter for closed fracture                                  |  |  |
| S72.121B | Displaced fracture of lesser trochanter of right femur, initial encounter for open fracture type I or II                       |  |  |
| S72.121C | Displaced fracture of lesser trochanter of right femur, initial encounter for open fracture type IIIA, IIIB, or IIIC           |  |  |
| S72.122A | Displaced fracture of lesser trochanter of left femur, initial encounter for closed fracture                                   |  |  |
| S72.122B | Displaced fracture of lesser trochanter of left femur, initial encounter for open fracture type I or II                        |  |  |
| S72.122C | Displaced fracture of lesser trochanter of left femur, initial encounter for open fracture type IIIA, IIIB, or IIIC            |  |  |
| S72.123A | Displaced fracture of lesser trochanter of unspecified femur, initial encounter for closed fracture                            |  |  |
| S72.123B | Displaced fracture of lesser trochanter of unspecified femur, initial encounter for open fracture type I or II                 |  |  |
| S72.123C | Displaced fracture of lesser trochanter of unspecified femur, initial encounter for open fracture type IIIA, IIIB, or IIIC     |  |  |

|          |                                                                                                                               |  |  |
|----------|-------------------------------------------------------------------------------------------------------------------------------|--|--|
| S72.124A | Nondisplaced fracture of lesser trochanter of right femur, initial encounter for closed fracture                              |  |  |
| S72.124B | Nondisplaced fracture of lesser trochanter of right femur, initial encounter for open fracture type I or II                   |  |  |
| S72.124C | Nondisplaced fracture of lesser trochanter of right femur, initial encounter for open fracture type IIIA, IIIB, or IIIC       |  |  |
| S72.125A | Nondisplaced fracture of lesser trochanter of left femur, initial encounter for closed fracture                               |  |  |
| S72.125B | Nondisplaced fracture of lesser trochanter of left femur, initial encounter for open fracture type I or II                    |  |  |
| S72.125C | Nondisplaced fracture of lesser trochanter of left femur, initial encounter for open fracture type IIIA, IIIB, or IIIC        |  |  |
| S72.126A | Nondisplaced fracture of lesser trochanter of unspecified femur, initial encounter for closed fracture                        |  |  |
| S72.126B | Nondisplaced fracture of lesser trochanter of unspecified femur, initial encounter for open fracture type I or II             |  |  |
| S72.126C | Nondisplaced fracture of lesser trochanter of unspecified femur, initial encounter for open fracture type IIIA, IIIB, or IIIC |  |  |
| S72.131A | Displaced apophyseal fracture of right femur, initial encounter for closed fracture                                           |  |  |
| S72.131B | Displaced apophyseal fracture of right femur, initial encounter for open fracture type I or II                                |  |  |
| S72.131C | Displaced apophyseal fracture of right femur, initial encounter for open fracture type IIIA, IIIB, or IIIC                    |  |  |
| S72.132A | Displaced apophyseal fracture of left femur, initial encounter for closed fracture                                            |  |  |
| S72.132B | Displaced apophyseal fracture of left femur, initial encounter for open fracture type I or II                                 |  |  |
| S72.132C | Displaced apophyseal fracture of left femur, initial encounter for open fracture type IIIA, IIIB, or IIIC                     |  |  |
| S72.133A | Displaced apophyseal fracture of unspecified femur, initial encounter for closed fracture                                     |  |  |
| S72.133B | Displaced apophyseal fracture of unspecified femur, initial encounter for open fracture type I or II                          |  |  |
| S72.133C | Displaced apophyseal fracture of unspecified femur, initial encounter for open fracture type IIIA, IIIB, or IIIC              |  |  |
| S72.134A | Nondisplaced apophyseal fracture of right femur, initial encounter for closed fracture                                        |  |  |

|          |                                                                                                                         |  |  |
|----------|-------------------------------------------------------------------------------------------------------------------------|--|--|
| S72.134B | Nondisplaced apophyseal fracture of right femur, initial encounter for open fracture type I or II                       |  |  |
| S72.134C | Nondisplaced apophyseal fracture of right femur, initial encounter for open fracture type IIIA, IIIB, or IIIC           |  |  |
| S72.135A | Nondisplaced apophyseal fracture of left femur, initial encounter for closed fracture                                   |  |  |
| S72.135B | Nondisplaced apophyseal fracture of left femur, initial encounter for open fracture type I or II                        |  |  |
| S72.135C | Nondisplaced apophyseal fracture of left femur, initial encounter for open fracture type IIIA, IIIB, or IIIC            |  |  |
| S72.136A | Nondisplaced apophyseal fracture of unspecified femur, initial encounter for closed fracture                            |  |  |
| S72.136B | Nondisplaced apophyseal fracture of unspecified femur, initial encounter for open fracture type I or II                 |  |  |
| S72.136C | Nondisplaced apophyseal fracture of unspecified femur, initial encounter for open fracture type IIIA, IIIB, or IIIC     |  |  |
| S72.141A | Displaced intertrochanteric fracture of right femur, initial encounter for closed fracture                              |  |  |
| S72.141B | Displaced intertrochanteric fracture of right femur, initial encounter for open fracture type I or II                   |  |  |
| S72.141C | Displaced intertrochanteric fracture of right femur, initial encounter for open fracture type IIIA, IIIB, or IIIC       |  |  |
| S72.142A | Displaced intertrochanteric fracture of left femur, initial encounter for closed fracture                               |  |  |
| S72.142B | Displaced intertrochanteric fracture of left femur, initial encounter for open fracture type I or II                    |  |  |
| S72.142C | Displaced intertrochanteric fracture of left femur, initial encounter for open fracture type IIIA, IIIB, or IIIC        |  |  |
| S72.143A | Displaced intertrochanteric fracture of unspecified femur, initial encounter for closed fracture                        |  |  |
| S72.143B | Displaced intertrochanteric fracture of unspecified femur, initial encounter for open fracture type I or II             |  |  |
| S72.143C | Displaced intertrochanteric fracture of unspecified femur, initial encounter for open fracture type IIIA, IIIB, or IIIC |  |  |
| S72.144A | Nondisplaced intertrochanteric fracture of right femur, initial encounter for closed fracture                           |  |  |
| S72.144B | Nondisplaced intertrochanteric fracture of right femur, initial encounter for open fracture type I or II                |  |  |



|          |                                                                                                                            |  |  |
|----------|----------------------------------------------------------------------------------------------------------------------------|--|--|
| S72.144C | Nondisplaced intertrochanteric fracture of right femur, initial encounter for open fracture type IIIA, IIIB, or IIIC       |  |  |
| S72.145A | Nondisplaced intertrochanteric fracture of left femur, initial encounter for closed fracture                               |  |  |
| S72.145B | Nondisplaced intertrochanteric fracture of left femur, initial encounter for open fracture type I or II                    |  |  |
| S72.145C | Nondisplaced intertrochanteric fracture of left femur, initial encounter for open fracture type IIIA, IIIB, or IIIC        |  |  |
| S72.146A | Nondisplaced intertrochanteric fracture of unspecified femur, initial encounter for closed fracture                        |  |  |
| S72.146B | Nondisplaced intertrochanteric fracture of unspecified femur, initial encounter for open fracture type I or II             |  |  |
| S72.146C | Nondisplaced intertrochanteric fracture of unspecified femur, initial encounter for open fracture type IIIA, IIIB, or IIIC |  |  |
| S72.21XA | Displaced subtrochanteric fracture of right femur, initial encounter for closed fracture                                   |  |  |
| S72.21XB | Displaced subtrochanteric fracture of right femur, initial encounter for open fracture type I or II                        |  |  |
| S72.21XC | Displaced subtrochanteric fracture of right femur, initial encounter for open fracture type IIIA, IIIB, or IIIC            |  |  |
| S72.22XA | Displaced subtrochanteric fracture of left femur, initial encounter for closed fracture                                    |  |  |
| S72.22XB | Displaced subtrochanteric fracture of left femur, initial encounter for open fracture type I or II                         |  |  |
| S72.22XC | Displaced subtrochanteric fracture of left femur, initial encounter for open fracture type IIIA, IIIB, or IIIC             |  |  |
| S72.23XA | Displaced subtrochanteric fracture of unspecified femur, initial encounter for closed fracture                             |  |  |
| S72.23XB | Displaced subtrochanteric fracture of unspecified femur, initial encounter for open fracture type I or II                  |  |  |
| S72.23XC | Displaced subtrochanteric fracture of unspecified femur, initial encounter for open fracture type IIIA, IIIB, or IIIC      |  |  |
| S72.24XA | Nondisplaced subtrochanteric fracture of right femur, initial encounter for closed fracture                                |  |  |
| S72.24XB | Nondisplaced subtrochanteric fracture of right femur, initial encounter for open fracture type I or II                     |  |  |
| S72.24XC | Nondisplaced subtrochanteric fracture of right femur, initial encounter for open fracture type IIIA, IIIB, or IIIC         |  |  |

|          |                                                                                                                          |  |  |
|----------|--------------------------------------------------------------------------------------------------------------------------|--|--|
| S72.25XA | Nondisplaced subtrochanteric fracture of left femur, initial encounter for closed fracture                               |  |  |
| S72.25XB | Nondisplaced subtrochanteric fracture of left femur, initial encounter for open fracture type I or II                    |  |  |
| S72.25XC | Nondisplaced subtrochanteric fracture of left femur, initial encounter for open fracture type IIIA, IIIB, or IIIC        |  |  |
| S72.26XA | Nondisplaced subtrochanteric fracture of unspecified femur, initial encounter for closed fracture                        |  |  |
| S72.26XB | Nondisplaced subtrochanteric fracture of unspecified femur, initial encounter for open fracture type I or II             |  |  |
| S72.26XC | Nondisplaced subtrochanteric fracture of unspecified femur, initial encounter for open fracture type IIIA, IIIB, or IIIC |  |  |
| S72.301A | Unspecified fracture of shaft of right femur, initial encounter for closed fracture                                      |  |  |
| S72.301B | Unspecified fracture of shaft of right femur, initial encounter for open fracture type I or II                           |  |  |
| S72.301C | Unspecified fracture of shaft of right femur, initial encounter for open fracture type IIIA, IIIB, or IIIC               |  |  |
| S72.302A | Unspecified fracture of shaft of left femur, initial encounter for closed fracture                                       |  |  |
| S72.302B | Unspecified fracture of shaft of left femur, initial encounter for open fracture type I or II                            |  |  |
| S72.302C | Unspecified fracture of shaft of left femur, initial encounter for open fracture type IIIA, IIIB, or IIIC                |  |  |
| S72.309A | Unspecified fracture of shaft of unspecified femur, initial encounter for closed fracture                                |  |  |
| S72.309B | Unspecified fracture of shaft of unspecified femur, initial encounter for open fracture type I or II                     |  |  |
| S72.309C | Unspecified fracture of shaft of unspecified femur, initial encounter for open fracture type IIIA, IIIB, or IIIC         |  |  |
| S72.321A | Displaced transverse fracture of shaft of right femur, initial encounter for closed fracture                             |  |  |
| S72.321B | Displaced transverse fracture of shaft of right femur, initial encounter for open fracture type I or II                  |  |  |
| S72.321C | Displaced transverse fracture of shaft of right femur, initial encounter for open fracture type IIIA, IIIB, or IIIC      |  |  |
| S72.322A | Displaced transverse fracture of shaft of left femur, initial encounter for closed fracture                              |  |  |

|          |                                                                                                                              |  |  |
|----------|------------------------------------------------------------------------------------------------------------------------------|--|--|
| S72.322B | Displaced transverse fracture of shaft of left femur, initial encounter for open fracture type I or II                       |  |  |
| S72.322C | Displaced transverse fracture of shaft of left femur, initial encounter for open fracture type IIIA, IIIB, or IIIC           |  |  |
| S72.323A | Displaced transverse fracture of shaft of unspecified femur, initial encounter for closed fracture                           |  |  |
| S72.323B | Displaced transverse fracture of shaft of unspecified femur, initial encounter for open fracture type I or II                |  |  |
| S72.323C | Displaced transverse fracture of shaft of unspecified femur, initial encounter for open fracture type IIIA, IIIB, or IIIC    |  |  |
| S72.324A | Nondisplaced transverse fracture of shaft of right femur, initial encounter for closed fracture                              |  |  |
| S72.324B | Nondisplaced transverse fracture of shaft of right femur, initial encounter for open fracture type I or II                   |  |  |
| S72.324C | Nondisplaced transverse fracture of shaft of right femur, initial encounter for open fracture type IIIA, IIIB, or IIIC       |  |  |
| S72.325A | Nondisplaced transverse fracture of shaft of left femur, initial encounter for closed fracture                               |  |  |
| S72.325B | Nondisplaced transverse fracture of shaft of left femur, initial encounter for open fracture type I or II                    |  |  |
| S72.325C | Nondisplaced transverse fracture of shaft of left femur, initial encounter for open fracture type IIIA, IIIB, or IIIC        |  |  |
| S72.326A | Nondisplaced transverse fracture of shaft of unspecified femur, initial encounter for closed fracture                        |  |  |
| S72.326B | Nondisplaced transverse fracture of shaft of unspecified femur, initial encounter for open fracture type I or II             |  |  |
| S72.326C | Nondisplaced transverse fracture of shaft of unspecified femur, initial encounter for open fracture type IIIA, IIIB, or IIIC |  |  |
| S72.331A | Displaced oblique fracture of shaft of right femur, initial encounter for closed fracture                                    |  |  |
| S72.331B | Displaced oblique fracture of shaft of right femur, initial encounter for open fracture type I or II                         |  |  |
| S72.331C | Displaced oblique fracture of shaft of right femur, initial encounter for open fracture type IIIA, IIIB, or IIIC             |  |  |
| S72.332A | Displaced oblique fracture of shaft of left femur, initial encounter for closed fracture                                     |  |  |

|          |                                                                                                                           |  |  |
|----------|---------------------------------------------------------------------------------------------------------------------------|--|--|
| S72.332B | Displaced oblique fracture of shaft of left femur, initial encounter for open fracture type I or II                       |  |  |
| S72.332C | Displaced oblique fracture of shaft of left femur, initial encounter for open fracture type IIIA, IIIB, or IIIC           |  |  |
| S72.333A | Displaced oblique fracture of shaft of unspecified femur, initial encounter for closed fracture                           |  |  |
| S72.333B | Displaced oblique fracture of shaft of unspecified femur, initial encounter for open fracture type I or II                |  |  |
| S72.333C | Displaced oblique fracture of shaft of unspecified femur, initial encounter for open fracture type IIIA, IIIB, or IIIC    |  |  |
| S72.334A | Nondisplaced oblique fracture of shaft of right femur, initial encounter for closed fracture                              |  |  |
| S72.334B | Nondisplaced oblique fracture of shaft of right femur, initial encounter for open fracture type I or II                   |  |  |
| S72.334C | Nondisplaced oblique fracture of shaft of right femur, initial encounter for open fracture type IIIA, IIIB, or IIIC       |  |  |
| S72.335A | Nondisplaced oblique fracture of shaft of left femur, initial encounter for closed fracture                               |  |  |
| S72.335B | Nondisplaced oblique fracture of shaft of left femur, initial encounter for open fracture type I or II                    |  |  |
| S72.335C | Nondisplaced oblique fracture of shaft of left femur, initial encounter for open fracture type IIIA, IIIB, or IIIC        |  |  |
| S72.336A | Nondisplaced oblique fracture of shaft of unspecified femur, initial encounter for closed fracture                        |  |  |
| S72.336B | Nondisplaced oblique fracture of shaft of unspecified femur, initial encounter for open fracture type I or II             |  |  |
| S72.336C | Nondisplaced oblique fracture of shaft of unspecified femur, initial encounter for open fracture type IIIA, IIIB, or IIIC |  |  |
| S72.341A | Displaced spiral fracture of shaft of right femur, initial encounter for closed fracture                                  |  |  |
| S72.341B | Displaced spiral fracture of shaft of right femur, initial encounter for open fracture type I or II                       |  |  |
| S72.341C | Displaced spiral fracture of shaft of right femur, initial encounter for open fracture type IIIA, IIIB, or IIIC           |  |  |
| S72.342A | Displaced spiral fracture of shaft of left femur, initial encounter for closed fracture                                   |  |  |
| S72.342B | Displaced spiral fracture of shaft of left femur, initial encounter for open fracture type I or II                        |  |  |

|          |                                                                                                                          |  |  |
|----------|--------------------------------------------------------------------------------------------------------------------------|--|--|
| S72.342C | Displaced spiral fracture of shaft of left femur, initial encounter for open fracture type IIIA, IIIB, or IIIC           |  |  |
| S72.343A | Displaced spiral fracture of shaft of unspecified femur, initial encounter for closed fracture                           |  |  |
| S72.343B | Displaced spiral fracture of shaft of unspecified femur, initial encounter for open fracture type I or II                |  |  |
| S72.343C | Displaced spiral fracture of shaft of unspecified femur, initial encounter for open fracture type IIIA, IIIB, or IIIC    |  |  |
| S72.344A | Nondisplaced spiral fracture of shaft of right femur, initial encounter for closed fracture                              |  |  |
| S72.344B | Nondisplaced spiral fracture of shaft of right femur, initial encounter for open fracture type I or II                   |  |  |
| S72.344C | Nondisplaced spiral fracture of shaft of right femur, initial encounter for open fracture type IIIA, IIIB, or IIIC       |  |  |
| S72.345A | Nondisplaced spiral fracture of shaft of left femur, initial encounter for closed fracture                               |  |  |
| S72.345B | Nondisplaced spiral fracture of shaft of left femur, initial encounter for open fracture type I or II                    |  |  |
| S72.345C | Nondisplaced spiral fracture of shaft of left femur, initial encounter for open fracture type IIIA, IIIB, or IIIC        |  |  |
| S72.346A | Nondisplaced spiral fracture of shaft of unspecified femur, initial encounter for closed fracture                        |  |  |
| S72.346B | Nondisplaced spiral fracture of shaft of unspecified femur, initial encounter for open fracture type I or II             |  |  |
| S72.346C | Nondisplaced spiral fracture of shaft of unspecified femur, initial encounter for open fracture type IIIA, IIIB, or IIIC |  |  |
| S72.351A | Displaced comminuted fracture of shaft of right femur, initial encounter for closed fracture                             |  |  |
| S72.351B | Displaced comminuted fracture of shaft of right femur, initial encounter for open fracture type I or II                  |  |  |
| S72.351C | Displaced comminuted fracture of shaft of right femur, initial encounter for open fracture type IIIA, IIIB, or IIIC      |  |  |
| S72.352A | Displaced comminuted fracture of shaft of left femur, initial encounter for closed fracture                              |  |  |
| S72.352B | Displaced comminuted fracture of shaft of left femur, initial encounter for open fracture type I or II                   |  |  |
| S72.352C | Displaced comminuted fracture of shaft of left femur, initial encounter for open fracture type IIIA, IIIB, or IIIC       |  |  |

|          |                                                                                                                              |  |  |
|----------|------------------------------------------------------------------------------------------------------------------------------|--|--|
| S72.353A | Displaced comminuted fracture of shaft of unspecified femur, initial encounter for closed fracture                           |  |  |
| S72.353B | Displaced comminuted fracture of shaft of unspecified femur, initial encounter for open fracture type I or II                |  |  |
| S72.353C | Displaced comminuted fracture of shaft of unspecified femur, initial encounter for open fracture type IIIA, IIIB, or IIIC    |  |  |
| S72.354A | Nondisplaced comminuted fracture of shaft of right femur, initial encounter for closed fracture                              |  |  |
| S72.354B | Nondisplaced comminuted fracture of shaft of right femur, initial encounter for open fracture type I or II                   |  |  |
| S72.354C | Nondisplaced comminuted fracture of shaft of right femur, initial encounter for open fracture type IIIA, IIIB, or IIIC       |  |  |
| S72.355A | Nondisplaced comminuted fracture of shaft of left femur, initial encounter for closed fracture                               |  |  |
| S72.355B | Nondisplaced comminuted fracture of shaft of left femur, initial encounter for open fracture type I or II                    |  |  |
| S72.355C | Nondisplaced comminuted fracture of shaft of left femur, initial encounter for open fracture type IIIA, IIIB, or IIIC        |  |  |
| S72.356A | Nondisplaced comminuted fracture of shaft of unspecified femur, initial encounter for closed fracture                        |  |  |
| S72.356B | Nondisplaced comminuted fracture of shaft of unspecified femur, initial encounter for open fracture type I or II             |  |  |
| S72.356C | Nondisplaced comminuted fracture of shaft of unspecified femur, initial encounter for open fracture type IIIA, IIIB, or IIIC |  |  |
| S72.361A | Displaced segmental fracture of shaft of right femur, initial encounter for closed fracture                                  |  |  |
| S72.361B | Displaced segmental fracture of shaft of right femur, initial encounter for open fracture type I or II                       |  |  |
| S72.361C | Displaced segmental fracture of shaft of right femur, initial encounter for open fracture type IIIA, IIIB, or IIIC           |  |  |
| S72.362A | Displaced segmental fracture of shaft of left femur, initial encounter for closed fracture                                   |  |  |
| S72.362B | Displaced segmental fracture of shaft of left femur, initial encounter for open fracture type I or II                        |  |  |

|          |                                                                                                                             |  |  |
|----------|-----------------------------------------------------------------------------------------------------------------------------|--|--|
| S72.362C | Displaced segmental fracture of shaft of left femur, initial encounter for open fracture type IIIA, IIIB, or IIIC           |  |  |
| S72.363A | Displaced segmental fracture of shaft of unspecified femur, initial encounter for closed fracture                           |  |  |
| S72.363B | Displaced segmental fracture of shaft of unspecified femur, initial encounter for open fracture type I or II                |  |  |
| S72.363C | Displaced segmental fracture of shaft of unspecified femur, initial encounter for open fracture type IIIA, IIIB, or IIIC    |  |  |
| S72.364A | Nondisplaced segmental fracture of shaft of right femur, initial encounter for closed fracture                              |  |  |
| S72.364B | Nondisplaced segmental fracture of shaft of right femur, initial encounter for open fracture type I or II                   |  |  |
| S72.364C | Nondisplaced segmental fracture of shaft of right femur, initial encounter for open fracture type IIIA, IIIB, or IIIC       |  |  |
| S72.365A | Nondisplaced segmental fracture of shaft of left femur, initial encounter for closed fracture                               |  |  |
| S72.365B | Nondisplaced segmental fracture of shaft of left femur, initial encounter for open fracture type I or II                    |  |  |
| S72.365C | Nondisplaced segmental fracture of shaft of left femur, initial encounter for open fracture type IIIA, IIIB, or IIIC        |  |  |
| S72.366A | Nondisplaced segmental fracture of shaft of unspecified femur, initial encounter for closed fracture                        |  |  |
| S72.366B | Nondisplaced segmental fracture of shaft of unspecified femur, initial encounter for open fracture type I or II             |  |  |
| S72.366C | Nondisplaced segmental fracture of shaft of unspecified femur, initial encounter for open fracture type IIIA, IIIB, or IIIC |  |  |
| S72.391A | Other fracture of shaft of right femur, initial encounter for closed fracture                                               |  |  |
| S72.391B | Other fracture of shaft of right femur, initial encounter for open fracture type I or II                                    |  |  |
| S72.391C | Other fracture of shaft of right femur, initial encounter for open fracture type IIIA, IIIB, or IIIC                        |  |  |
| S72.392A | Other fracture of shaft of left femur, initial encounter for closed fracture                                                |  |  |
| S72.392B | Other fracture of shaft of left femur, initial encounter for open fracture type I or II                                     |  |  |

|          |                                                                                                                                  |  |  |
|----------|----------------------------------------------------------------------------------------------------------------------------------|--|--|
| S72.392C | Other fracture of shaft of left femur, initial encounter for open fracture type IIIA, IIIB, or IIIC                              |  |  |
| S72.399A | Other fracture of shaft of unspecified femur, initial encounter for closed fracture                                              |  |  |
| S72.399B | Other fracture of shaft of unspecified femur, initial encounter for open fracture type I or II                                   |  |  |
| S72.399C | Other fracture of shaft of unspecified femur, initial encounter for open fracture type IIIA, IIIB, or IIIC                       |  |  |
| S72.401A | Unspecified fracture of lower end of right femur, initial encounter for closed fracture                                          |  |  |
| S72.401B | Unspecified fracture of lower end of right femur, initial encounter for open fracture type I or II                               |  |  |
| S72.401C | Unspecified fracture of lower end of right femur, initial encounter for open fracture type IIIA, IIIB, or IIIC                   |  |  |
| S72.402A | Unspecified fracture of lower end of left femur, initial encounter for closed fracture                                           |  |  |
| S72.402B | Unspecified fracture of lower end of left femur, initial encounter for open fracture type I or II                                |  |  |
| S72.402C | Unspecified fracture of lower end of left femur, initial encounter for open fracture type IIIA, IIIB, or IIIC                    |  |  |
| S72.409A | Unspecified fracture of lower end of unspecified femur, initial encounter for closed fracture                                    |  |  |
| S72.409B | Unspecified fracture of lower end of unspecified femur, initial encounter for open fracture type I or II                         |  |  |
| S72.409C | Unspecified fracture of lower end of unspecified femur, initial encounter for open fracture type IIIA, IIIB, or IIIC             |  |  |
| S72.411A | Displaced unspecified condyle fracture of lower end of right femur, initial encounter for closed fracture                        |  |  |
| S72.411B | Displaced unspecified condyle fracture of lower end of right femur, initial encounter for open fracture type I or II             |  |  |
| S72.411C | Displaced unspecified condyle fracture of lower end of right femur, initial encounter for open fracture type IIIA, IIIB, or IIIC |  |  |
| S72.412A | Displaced unspecified condyle fracture of lower end of left femur, initial encounter for closed fracture                         |  |  |
| S72.412B | Displaced unspecified condyle fracture of lower end of left femur, initial encounter for open fracture type I or II              |  |  |



|          |                                                                                                                                           |  |  |
|----------|-------------------------------------------------------------------------------------------------------------------------------------------|--|--|
| S72.412C | Displaced unspecified condyle fracture of lower end of left femur, initial encounter for open fracture type IIIA, IIIB, or IIIC           |  |  |
| S72.413A | Displaced unspecified condyle fracture of lower end of unspecified femur, initial encounter for closed fracture                           |  |  |
| S72.413B | Displaced unspecified condyle fracture of lower end of unspecified femur, initial encounter for open fracture type I or II                |  |  |
| S72.413C | Displaced unspecified condyle fracture of lower end of unspecified femur, initial encounter for open fracture type IIIA, IIIB, or IIIC    |  |  |
| S72.414A | Nondisplaced unspecified condyle fracture of lower end of right femur, initial encounter for closed fracture                              |  |  |
| S72.414B | Nondisplaced unspecified condyle fracture of lower end of right femur, initial encounter for open fracture type I or II                   |  |  |
| S72.414C | Nondisplaced unspecified condyle fracture of lower end of right femur, initial encounter for open fracture type IIIA, IIIB, or IIIC       |  |  |
| S72.415A | Nondisplaced unspecified condyle fracture of lower end of left femur, initial encounter for closed fracture                               |  |  |
| S72.415B | Nondisplaced unspecified condyle fracture of lower end of left femur, initial encounter for open fracture type I or II                    |  |  |
| S72.415C | Nondisplaced unspecified condyle fracture of lower end of left femur, initial encounter for open fracture type IIIA, IIIB, or IIIC        |  |  |
| S72.416A | Nondisplaced unspecified condyle fracture of lower end of unspecified femur, initial encounter for closed fracture                        |  |  |
| S72.416B | Nondisplaced unspecified condyle fracture of lower end of unspecified femur, initial encounter for open fracture type I or II             |  |  |
| S72.416C | Nondisplaced unspecified condyle fracture of lower end of unspecified femur, initial encounter for open fracture type IIIA, IIIB, or IIIC |  |  |
| S72.421A | Displaced fracture of lateral condyle of right femur, initial encounter for closed fracture                                               |  |  |
| S72.421B | Displaced fracture of lateral condyle of right femur, initial encounter for open fracture type I or II                                    |  |  |

|          |                                                                                                                             |  |  |
|----------|-----------------------------------------------------------------------------------------------------------------------------|--|--|
| S72.421C | Displaced fracture of lateral condyle of right femur, initial encounter for open fracture type IIIA, IIIB, or IIIC          |  |  |
| S72.422A | Displaced fracture of lateral condyle of left femur, initial encounter for closed fracture                                  |  |  |
| S72.422B | Displaced fracture of lateral condyle of left femur, initial encounter for open fracture type I or II                       |  |  |
| S72.422C | Displaced fracture of lateral condyle of left femur, initial encounter for open fracture type IIIA, IIIB, or IIIC           |  |  |
| S72.423A | Displaced fracture of lateral condyle of unspecified femur, initial encounter for closed fracture                           |  |  |
| S72.423B | Displaced fracture of lateral condyle of unspecified femur, initial encounter for open fracture type I or II                |  |  |
| S72.423C | Displaced fracture of lateral condyle of unspecified femur, initial encounter for open fracture type IIIA, IIIB, or IIIC    |  |  |
| S72.424A | Nondisplaced fracture of lateral condyle of right femur, initial encounter for closed fracture                              |  |  |
| S72.424B | Nondisplaced fracture of lateral condyle of right femur, initial encounter for open fracture type I or II                   |  |  |
| S72.424C | Nondisplaced fracture of lateral condyle of right femur, initial encounter for open fracture type IIIA, IIIB, or IIIC       |  |  |
| S72.425A | Nondisplaced fracture of lateral condyle of left femur, initial encounter for closed fracture                               |  |  |
| S72.425B | Nondisplaced fracture of lateral condyle of left femur, initial encounter for open fracture type I or II                    |  |  |
| S72.425C | Nondisplaced fracture of lateral condyle of left femur, initial encounter for open fracture type IIIA, IIIB, or IIIC        |  |  |
| S72.426A | Nondisplaced fracture of lateral condyle of unspecified femur, initial encounter for closed fracture                        |  |  |
| S72.426B | Nondisplaced fracture of lateral condyle of unspecified femur, initial encounter for open fracture type I or II             |  |  |
| S72.426C | Nondisplaced fracture of lateral condyle of unspecified femur, initial encounter for open fracture type IIIA, IIIB, or IIIC |  |  |
| S72.431A | Displaced fracture of medial condyle of right femur, initial encounter for closed fracture                                  |  |  |
| S72.431B | Displaced fracture of medial condyle of right femur, initial encounter for open fracture type I or II                       |  |  |

|          |                                                                                                                            |  |  |
|----------|----------------------------------------------------------------------------------------------------------------------------|--|--|
| S72.431C | Displaced fracture of medial condyle of right femur, initial encounter for open fracture type IIIA, IIIB, or IIIC          |  |  |
| S72.432A | Displaced fracture of medial condyle of left femur, initial encounter for closed fracture                                  |  |  |
| S72.432B | Displaced fracture of medial condyle of left femur, initial encounter for open fracture type I or II                       |  |  |
| S72.432C | Displaced fracture of medial condyle of left femur, initial encounter for open fracture type IIIA, IIIB, or IIIC           |  |  |
| S72.433A | Displaced fracture of medial condyle of unspecified femur, initial encounter for closed fracture                           |  |  |
| S72.433B | Displaced fracture of medial condyle of unspecified femur, initial encounter for open fracture type I or II                |  |  |
| S72.433C | Displaced fracture of medial condyle of unspecified femur, initial encounter for open fracture type IIIA, IIIB, or IIIC    |  |  |
| S72.434A | Nondisplaced fracture of medial condyle of right femur, initial encounter for closed fracture                              |  |  |
| S72.434B | Nondisplaced fracture of medial condyle of right femur, initial encounter for open fracture type I or II                   |  |  |
| S72.434C | Nondisplaced fracture of medial condyle of right femur, initial encounter for open fracture type IIIA, IIIB, or IIIC       |  |  |
| S72.435A | Nondisplaced fracture of medial condyle of left femur, initial encounter for closed fracture                               |  |  |
| S72.435B | Nondisplaced fracture of medial condyle of left femur, initial encounter for open fracture type I or II                    |  |  |
| S72.435C | Nondisplaced fracture of medial condyle of left femur, initial encounter for open fracture type IIIA, IIIB, or IIIC        |  |  |
| S72.436A | Nondisplaced fracture of medial condyle of unspecified femur, initial encounter for closed fracture                        |  |  |
| S72.436B | Nondisplaced fracture of medial condyle of unspecified femur, initial encounter for open fracture type I or II             |  |  |
| S72.436C | Nondisplaced fracture of medial condyle of unspecified femur, initial encounter for open fracture type IIIA, IIIB, or IIIC |  |  |
| S72.441A | Displaced fracture of lower epiphysis (separation) of right femur, initial encounter for closed fracture                   |  |  |
| S72.441B | Displaced fracture of lower epiphysis (separation) of right femur, initial encounter for open fracture type I or II        |  |  |

|          |                                                                                                                                       |  |  |
|----------|---------------------------------------------------------------------------------------------------------------------------------------|--|--|
| S72.441C | Displaced fracture of lower epiphysis (separation) of right femur, initial encounter for open fracture type IIIA, IIIB, or IIIC       |  |  |
| S72.442A | Displaced fracture of lower epiphysis (separation) of left femur, initial encounter for closed fracture                               |  |  |
| S72.442B | Displaced fracture of lower epiphysis (separation) of left femur, initial encounter for open fracture type I or II                    |  |  |
| S72.442C | Displaced fracture of lower epiphysis (separation) of left femur, initial encounter for open fracture type IIIA, IIIB, or IIIC        |  |  |
| S72.443A | Displaced fracture of lower epiphysis (separation) of unspecified femur, initial encounter for closed fracture                        |  |  |
| S72.443B | Displaced fracture of lower epiphysis (separation) of unspecified femur, initial encounter for open fracture type I or II             |  |  |
| S72.443C | Displaced fracture of lower epiphysis (separation) of unspecified femur, initial encounter for open fracture type IIIA, IIIB, or IIIC |  |  |
| S72.444A | Nondisplaced fracture of lower epiphysis (separation) of right femur, initial encounter for closed fracture                           |  |  |
| S72.444B | Nondisplaced fracture of lower epiphysis (separation) of right femur, initial encounter for open fracture type I or II                |  |  |
| S72.444C | Nondisplaced fracture of lower epiphysis (separation) of right femur, initial encounter for open fracture type IIIA, IIIB, or IIIC    |  |  |
| S72.445A | Nondisplaced fracture of lower epiphysis (separation) of left femur, initial encounter for closed fracture                            |  |  |
| S72.445B | Nondisplaced fracture of lower epiphysis (separation) of left femur, initial encounter for open fracture type I or II                 |  |  |
| S72.445C | Nondisplaced fracture of lower epiphysis (separation) of left femur, initial encounter for open fracture type IIIA, IIIB, or IIIC     |  |  |
| S72.446A | Nondisplaced fracture of lower epiphysis (separation) of unspecified femur, initial encounter for closed fracture                     |  |  |
| S72.446B | Nondisplaced fracture of lower epiphysis (separation) of unspecified femur, initial encounter for open fracture type I or II          |  |  |

|          |                                                                                                                                                                  |  |  |
|----------|------------------------------------------------------------------------------------------------------------------------------------------------------------------|--|--|
| S72.446C | Nondisplaced fracture of lower epiphysis (separation) of unspecified femur, initial encounter for open fracture type IIIA, IIIB, or IIIC                         |  |  |
| S72.451A | Displaced supracondylar fracture without intracondylar extension of lower end of right femur, initial encounter for closed fracture                              |  |  |
| S72.451B | Displaced supracondylar fracture without intracondylar extension of lower end of right femur, initial encounter for open fracture type I or II                   |  |  |
| S72.451C | Displaced supracondylar fracture without intracondylar extension of lower end of right femur, initial encounter for open fracture type IIIA, IIIB, or IIIC       |  |  |
| S72.452A | Displaced supracondylar fracture without intracondylar extension of lower end of left femur, initial encounter for closed fracture                               |  |  |
| S72.452B | Displaced supracondylar fracture without intracondylar extension of lower end of left femur, initial encounter for open fracture type I or II                    |  |  |
| S72.452C | Displaced supracondylar fracture without intracondylar extension of lower end of left femur, initial encounter for open fracture type IIIA, IIIB, or IIIC        |  |  |
| S72.453A | Displaced supracondylar fracture without intracondylar extension of lower end of unspecified femur, initial encounter for closed fracture                        |  |  |
| S72.453B | Displaced supracondylar fracture without intracondylar extension of lower end of unspecified femur, initial encounter for open fracture type I or II             |  |  |
| S72.453C | Displaced supracondylar fracture without intracondylar extension of lower end of unspecified femur, initial encounter for open fracture type IIIA, IIIB, or IIIC |  |  |
| S72.454A | Nondisplaced supracondylar fracture without intracondylar extension of lower end of right femur, initial encounter for closed fracture                           |  |  |
| S72.454B | Nondisplaced supracondylar fracture without intracondylar extension of lower end of right femur, initial encounter for open fracture type I or II                |  |  |
| S72.454C | Nondisplaced supracondylar fracture without intracondylar extension of lower end of right femur, initial encounter for open fracture type IIIA, IIIB, or IIIC    |  |  |

|          |                                                                                                                                                                     |  |  |
|----------|---------------------------------------------------------------------------------------------------------------------------------------------------------------------|--|--|
| S72.455A | Nondisplaced supracondylar fracture without intracondylar extension of lower end of left femur, initial encounter for closed fracture                               |  |  |
| S72.455B | Nondisplaced supracondylar fracture without intracondylar extension of lower end of left femur, initial encounter for open fracture type I or II                    |  |  |
| S72.455C | Nondisplaced supracondylar fracture without intracondylar extension of lower end of left femur, initial encounter for open fracture type IIIA, IIIB, or IIIC        |  |  |
| S72.456A | Nondisplaced supracondylar fracture without intracondylar extension of lower end of unspecified femur, initial encounter for closed fracture                        |  |  |
| S72.456B | Nondisplaced supracondylar fracture without intracondylar extension of lower end of unspecified femur, initial encounter for open fracture type I or II             |  |  |
| S72.456C | Nondisplaced supracondylar fracture without intracondylar extension of lower end of unspecified femur, initial encounter for open fracture type IIIA, IIIB, or IIIC |  |  |
| S72.461A | Displaced supracondylar fracture with intracondylar extension of lower end of right femur, initial encounter for closed fracture                                    |  |  |
| S72.461B | Displaced supracondylar fracture with intracondylar extension of lower end of right femur, initial encounter for open fracture type I or II                         |  |  |
| S72.461C | Displaced supracondylar fracture with intracondylar extension of lower end of right femur, initial encounter for open fracture type IIIA, IIIB, or IIIC             |  |  |
| S72.462A | Displaced supracondylar fracture with intracondylar extension of lower end of left femur, initial encounter for closed fracture                                     |  |  |
| S72.462B | Displaced supracondylar fracture with intracondylar extension of lower end of left femur, initial encounter for open fracture type I or II                          |  |  |
| S72.462C | Displaced supracondylar fracture with intracondylar extension of lower end of left femur, initial encounter for open fracture type IIIA, IIIB, or IIIC              |  |  |
| S72.463A | Displaced supracondylar fracture with intracondylar extension of lower end of unspecified femur, initial encounter for closed fracture                              |  |  |

|          |                                                                                                                                                                  |  |  |
|----------|------------------------------------------------------------------------------------------------------------------------------------------------------------------|--|--|
| S72.463B | Displaced supracondylar fracture with intracondylar extension of lower end of unspecified femur, initial encounter for open fracture type I or II                |  |  |
| S72.463C | Displaced supracondylar fracture with intracondylar extension of lower end of unspecified femur, initial encounter for open fracture type IIIA, IIIB, or IIIC    |  |  |
| S72.464A | Nondisplaced supracondylar fracture with intracondylar extension of lower end of right femur, initial encounter for closed fracture                              |  |  |
| S72.464B | Nondisplaced supracondylar fracture with intracondylar extension of lower end of right femur, initial encounter for open fracture type I or II                   |  |  |
| S72.464C | Nondisplaced supracondylar fracture with intracondylar extension of lower end of right femur, initial encounter for open fracture type IIIA, IIIB, or IIIC       |  |  |
| S72.465A | Nondisplaced supracondylar fracture with intracondylar extension of lower end of left femur, initial encounter for closed fracture                               |  |  |
| S72.465B | Nondisplaced supracondylar fracture with intracondylar extension of lower end of left femur, initial encounter for open fracture type I or II                    |  |  |
| S72.465C | Nondisplaced supracondylar fracture with intracondylar extension of lower end of left femur, initial encounter for open fracture type IIIA, IIIB, or IIIC        |  |  |
| S72.466A | Nondisplaced supracondylar fracture with intracondylar extension of lower end of unspecified femur, initial encounter for closed fracture                        |  |  |
| S72.466B | Nondisplaced supracondylar fracture with intracondylar extension of lower end of unspecified femur, initial encounter for open fracture type I or II             |  |  |
| S72.466C | Nondisplaced supracondylar fracture with intracondylar extension of lower end of unspecified femur, initial encounter for open fracture type IIIA, IIIB, or IIIC |  |  |
| S72.471A | Torus fracture of lower end of right femur, initial encounter for closed fracture                                                                                |  |  |
| S72.472A | Torus fracture of lower end of left femur, initial encounter for closed fracture                                                                                 |  |  |
| S72.479A | Torus fracture of lower end of unspecified femur, initial encounter for closed fracture                                                                          |  |  |

|          |                                                                                                                |  |  |
|----------|----------------------------------------------------------------------------------------------------------------|--|--|
| S72.491A | Other fracture of lower end of right femur, initial encounter for closed fracture                              |  |  |
| S72.491B | Other fracture of lower end of right femur, initial encounter for open fracture type I or II                   |  |  |
| S72.491C | Other fracture of lower end of right femur, initial encounter for open fracture type IIIA, IIIB, or IIIC       |  |  |
| S72.492A | Other fracture of lower end of left femur, initial encounter for closed fracture                               |  |  |
| S72.492B | Other fracture of lower end of left femur, initial encounter for open fracture type I or II                    |  |  |
| S72.492C | Other fracture of lower end of left femur, initial encounter for open fracture type IIIA, IIIB, or IIIC        |  |  |
| S72.499A | Other fracture of lower end of unspecified femur, initial encounter for closed fracture                        |  |  |
| S72.499B | Other fracture of lower end of unspecified femur, initial encounter for open fracture type I or II             |  |  |
| S72.499C | Other fracture of lower end of unspecified femur, initial encounter for open fracture type IIIA, IIIB, or IIIC |  |  |
| S72.8X1A | Other fracture of right femur, initial encounter for closed fracture                                           |  |  |
| S72.8X1B | Other fracture of right femur, initial encounter for open fracture type I or II                                |  |  |
| S72.8X1C | Other fracture of right femur, initial encounter for open fracture type IIIA, IIIB, or IIIC                    |  |  |
| S72.8X2A | Other fracture of left femur, initial encounter for closed fracture                                            |  |  |
| S72.8X2B | Other fracture of left femur, initial encounter for open fracture type I or II                                 |  |  |
| S72.8X2C | Other fracture of left femur, initial encounter for open fracture type IIIA, IIIB, or IIIC                     |  |  |
| S72.8X9A | Other fracture of unspecified femur, initial encounter for closed fracture                                     |  |  |
| S72.8X9B | Other fracture of unspecified femur, initial encounter for open fracture type I or II                          |  |  |
| S72.8X9C | Other fracture of unspecified femur, initial encounter for open fracture type IIIA, IIIB, or IIIC              |  |  |
| S72.90XA | Unspecified fracture of unspecified femur, initial encounter for closed fracture                               |  |  |



|          |                                                                                                         |  |  |
|----------|---------------------------------------------------------------------------------------------------------|--|--|
| S72.90XB | Unspecified fracture of unspecified femur, initial encounter for open fracture type I or II             |  |  |
| S72.90XC | Unspecified fracture of unspecified femur, initial encounter for open fracture type IIIA, IIIB, or IIIC |  |  |
| S72.91XA | Unspecified fracture of right femur, initial encounter for closed fracture                              |  |  |
| S72.91XB | Unspecified fracture of right femur, initial encounter for open fracture type I or II                   |  |  |
| S72.91XC | Unspecified fracture of right femur, initial encounter for open fracture type IIIA, IIIB, or IIIC       |  |  |
| S72.92XA | Unspecified fracture of left femur, initial encounter for closed fracture                               |  |  |
| S72.92XB | Unspecified fracture of left femur, initial encounter for open fracture type I or II                    |  |  |
| S72.92XC | Unspecified fracture of left femur, initial encounter for open fracture type IIIA, IIIB, or IIIC        |  |  |

## Included and Excluded ICD-10-CM Diagnosis Subcodes for Gastrointestinal Tract Bleeding and/or Perforation Condition Group

| Included ICD-10-CM diagnosis subcodes (n=39) |                                                                                             | Excluded ICD-10-CM diagnosis subcodes (n=27) |                                                                                                    |
|----------------------------------------------|---------------------------------------------------------------------------------------------|----------------------------------------------|----------------------------------------------------------------------------------------------------|
| Subcode                                      | Subcode description                                                                         | Subcode                                      | Subcode description                                                                                |
| K25.0                                        | Acute gastric ulcer with hemorrhage                                                         | K25.3                                        | Acute gastric ulcer without hemorrhage or perforation                                              |
| K25.1                                        | Acute gastric ulcer with perforation                                                        | K25.7                                        | Chronic gastric ulcer without hemorrhage or perforation                                            |
| K25.2                                        | Acute gastric ulcer with both hemorrhage and perforation                                    | K25.9                                        | Gastric ulcer, unspecified as acute or chronic, without hemorrhage or perforation                  |
| K25.4                                        | Chronic or unspecified gastric ulcer with hemorrhage                                        | K26.3                                        | Acute duodenal ulcer without hemorrhage or perforation                                             |
| K25.5                                        | Chronic or unspecified gastric ulcer with perforation                                       | K26.7                                        | Chronic duodenal ulcer without hemorrhage or perforation                                           |
| K25.6                                        | Chronic or unspecified gastric ulcer with both hemorrhage and perforation                   | K26.9                                        | Duodenal ulcer, unspecified as acute or chronic, without hemorrhage or perforation                 |
| K26.0                                        | Acute duodenal ulcer with hemorrhage                                                        | K27.3                                        | Acute peptic ulcer, site unspecified, without hemorrhage or perforation                            |
| K26.1                                        | Acute duodenal ulcer with perforation                                                       | K27.7                                        | Chronic peptic ulcer, site unspecified, without hemorrhage or perforation                          |
| K26.2                                        | Acute duodenal ulcer with both hemorrhage and perforation                                   | K27.9                                        | Peptic ulcer, site unspecified, unspecified as acute or chronic, without hemorrhage or perforation |
| K26.4                                        | Chronic or unspecified duodenal ulcer with hemorrhage                                       | K28.3                                        | Acute gastrojejunal ulcer without hemorrhage or perforation                                        |
| K26.5                                        | Chronic or unspecified duodenal ulcer with perforation                                      | K28.7                                        | Chronic gastrojejunal ulcer without hemorrhage or perforation                                      |
| K26.6                                        | Chronic or unspecified duodenal ulcer with both hemorrhage and perforation                  | K28.9                                        | Gastrojejunal ulcer, unspecified as acute or chronic, without hemorrhage or perforation            |
| K27.0                                        | Acute peptic ulcer, site unspecified, with hemorrhage                                       | K29.00                                       | Acute gastritis without bleeding                                                                   |
| K27.1                                        | Acute peptic ulcer, site unspecified, with perforation                                      | K29.20                                       | Alcoholic gastritis without bleeding                                                               |
| K27.2                                        | Acute peptic ulcer, site unspecified, with both hemorrhage and perforation                  | K29.30                                       | Chronic superficial gastritis without bleeding                                                     |
| K27.4                                        | Chronic or unspecified peptic ulcer, site unspecified, with hemorrhage                      | K29.40                                       | Chronic atrophic gastritis without bleeding                                                        |
| K27.5                                        | Chronic or unspecified peptic ulcer, site unspecified, with perforation                     | K29.50                                       | Unspecified chronic gastritis without bleeding                                                     |
| K27.6                                        | Chronic or unspecified peptic ulcer, site unspecified, with both hemorrhage and perforation | K29.60                                       | Other gastritis without bleeding                                                                   |
| K28.0                                        | Acute gastrojejunal ulcer with hemorrhage                                                   | K29.70                                       | Gastritis, unspecified, without bleeding                                                           |
| K28.1                                        | Acute gastrojejunal ulcer with perforation                                                  | K29.80                                       | Duodenitis without bleeding                                                                        |

|        |                                                                                 |        |                                                  |
|--------|---------------------------------------------------------------------------------|--------|--------------------------------------------------|
| K28.2  | Acute gastrojejunal ulcer with both hemorrhage and perforation                  | K29.90 | Gastroduodenitis, unspecified, without bleeding  |
| K28.4  | Chronic or unspecified gastrojejunal ulcer with hemorrhage                      | K55.1  | Chronic vascular disorders of intestine          |
| K28.5  | Chronic or unspecified gastrojejunal ulcer with perforation                     | K55.20 | Angiodysplasia of colon without hemorrhage       |
| K28.6  | Chronic or unspecified gastrojejunal ulcer with both hemorrhage and perforation | K55.8  | Other vascular disorders of intestine            |
| K29.01 | Acute gastritis with bleeding                                                   | K92.81 | Gastrointestinal mucositis (ulcerative)          |
| K29.21 | Alcoholic gastritis with bleeding                                               | K92.89 | Other specified diseases of the digestive system |
| K29.31 | Chronic superficial gastritis with bleeding                                     | K92.9  | Disease of digestive system, unspecified         |
| K29.41 | Chronic atrophic gastritis with bleeding                                        |        |                                                  |
| K29.51 | Unspecified chronic gastritis with bleeding                                     |        |                                                  |
| K29.61 | Other gastritis with bleeding                                                   |        |                                                  |
| K29.71 | Gastritis, unspecified, with bleeding                                           |        |                                                  |
| K29.81 | Duodenitis with bleeding                                                        |        |                                                  |
| K29.91 | Gastroduodenitis, unspecified, with bleeding                                    |        |                                                  |
| K55.0  | Acute vascular disorders of intestine                                           |        |                                                  |
| K55.21 | Angiodysplasia of colon with hemorrhage                                         |        |                                                  |
| K55.9  | Vascular disorder of intestine, unspecified                                     |        |                                                  |
| K92.0  | Hematemesis                                                                     |        |                                                  |
| K92.1  | Melena                                                                          |        |                                                  |
| K92.2  | Gastrointestinal hemorrhage, unspecified                                        |        |                                                  |

### Included and Excluded ICD-10-CM Diagnosis Subcodes for Heart Failure Condition Group

| Included ICD-10-CM diagnosis subcodes (n=14) |                                                                                          | Excluded ICD-10-CM diagnosis subcodes (n=0) |                     |
|----------------------------------------------|------------------------------------------------------------------------------------------|---------------------------------------------|---------------------|
| Subcode                                      | Subcode description                                                                      | Subcode                                     | Subcode description |
| I50.1                                        | Left ventricular failure                                                                 |                                             |                     |
| I50.20                                       | Unspecified systolic (congestive) heart failure                                          |                                             |                     |
| I50.21                                       | Acute systolic (congestive) heart failure                                                |                                             |                     |
| I50.22                                       | Chronic systolic (congestive) heart failure                                              |                                             |                     |
| I50.23                                       | Acute on chronic systolic (congestive) heart failure                                     |                                             |                     |
| I50.30                                       | Unspecified diastolic (congestive) heart failure                                         |                                             |                     |
| I50.31                                       | Acute diastolic (congestive) heart failure                                               |                                             |                     |
| I50.32                                       | Chronic diastolic (congestive) heart failure                                             |                                             |                     |
| I50.33                                       | Acute on chronic diastolic (congestive) heart failure                                    |                                             |                     |
| I50.40                                       | Unspecified combined systolic (congestive) and diastolic (congestive) heart failure      |                                             |                     |
| I50.41                                       | Acute combined systolic (congestive) and diastolic (congestive) heart failure            |                                             |                     |
| I50.42                                       | Chronic combined systolic (congestive) and diastolic (congestive) heart failure          |                                             |                     |
| I50.43                                       | Acute on chronic combined systolic (congestive) and diastolic (congestive) heart failure |                                             |                     |
| I50.9                                        | Heart failure, unspecified                                                               |                                             |                     |

### Included and Excluded ICD-10-CM Diagnosis Subcodes for Infectious Fasciitis Condition Group

| Included ICD-10-CM diagnosis subcodes (n=2) |                              | Excluded ICD-10-CM diagnosis subcodes (n=5) |                                         |
|---------------------------------------------|------------------------------|---------------------------------------------|-----------------------------------------|
| Subcode                                     | Subcode description          | Subcode                                     | Subcode description                     |
| M72.6                                       | Necrotizing fasciitis        | M72.0                                       | Palmar fascial fibromatosis [Dupuytren] |
| M72.8                                       | Other fibroblastic disorders | M72.1                                       | Knuckle pads                            |
|                                             |                              | M72.2                                       | Plantar fascial fibromatosis            |
|                                             |                              | M72.4                                       | Pseudosarcomatous fibromatosis          |
|                                             |                              | M72.9                                       | Fibroblastic disorder, unspecified      |

### Included and Excluded ICD-10-CM Diagnosis Subcodes for Intracranial Hemorrhage Condition Group

| Included ICD-10-CM diagnosis subcodes (n=34) |                                                                                      | Excluded ICD-10-CM diagnosis subcodes (n=1) |                                          |
|----------------------------------------------|--------------------------------------------------------------------------------------|---------------------------------------------|------------------------------------------|
| Subcode                                      | Subcode description                                                                  | Subcode                                     | Subcode description                      |
| I60.01                                       | Nontraumatic subarachnoid hemorrhage from right carotid siphon and bifurcation       | I62.03                                      | Nontraumatic chronic subdural hemorrhage |
| I60.02                                       | Nontraumatic subarachnoid hemorrhage from left carotid siphon and bifurcation        |                                             |                                          |
| I60.10                                       | Nontraumatic subarachnoid hemorrhage from unspecified middle cerebral artery         |                                             |                                          |
| I60.11                                       | Nontraumatic subarachnoid hemorrhage from right middle cerebral artery               |                                             |                                          |
| I60.12                                       | Nontraumatic subarachnoid hemorrhage from left middle cerebral artery                |                                             |                                          |
| I60.20                                       | Nontraumatic subarachnoid hemorrhage from unspecified anterior communicating artery  |                                             |                                          |
| I60.21                                       | Nontraumatic subarachnoid hemorrhage from right anterior communicating artery        |                                             |                                          |
| I60.22                                       | Nontraumatic subarachnoid hemorrhage from left anterior communicating artery         |                                             |                                          |
| I60.30                                       | Nontraumatic subarachnoid hemorrhage from unspecified posterior communicating artery |                                             |                                          |
| I60.31                                       | Nontraumatic subarachnoid hemorrhage from right posterior communicating artery       |                                             |                                          |
| I60.32                                       | Nontraumatic subarachnoid hemorrhage from left posterior communicating artery        |                                             |                                          |
| I60.4                                        | Nontraumatic subarachnoid hemorrhage from basilar artery                             |                                             |                                          |
| I60.50                                       | Nontraumatic subarachnoid hemorrhage from unspecified vertebral artery               |                                             |                                          |
| I60.51                                       | Nontraumatic subarachnoid hemorrhage from right vertebral artery                     |                                             |                                          |
| I60.52                                       | Nontraumatic subarachnoid hemorrhage from left vertebral artery                      |                                             |                                          |
| I60.6                                        | Nontraumatic subarachnoid hemorrhage from other intracranial arteries                |                                             |                                          |
| I60.7                                        | Nontraumatic subarachnoid hemorrhage from unspecified intracranial artery            |                                             |                                          |
| I60.8                                        | Other nontraumatic subarachnoid hemorrhage                                           |                                             |                                          |

|        |                                                                  |  |  |
|--------|------------------------------------------------------------------|--|--|
| I60.9  | Nontraumatic subarachnoid hemorrhage, unspecified                |  |  |
| I61.0  | Nontraumatic intracerebral hemorrhage in hemisphere, subcortical |  |  |
| I61.1  | Nontraumatic intracerebral hemorrhage in hemisphere, cortical    |  |  |
| I61.2  | Nontraumatic intracerebral hemorrhage in hemisphere, unspecified |  |  |
| I61.3  | Nontraumatic intracerebral hemorrhage in brain stem              |  |  |
| I61.4  | Nontraumatic intracerebral hemorrhage in cerebellum              |  |  |
| I61.5  | Nontraumatic intracerebral hemorrhage, intraventricular          |  |  |
| I61.6  | Nontraumatic intracerebral hemorrhage, multiple localized        |  |  |
| I61.8  | Other nontraumatic intracerebral hemorrhage                      |  |  |
| I61.9  | Nontraumatic intracerebral hemorrhage, unspecified               |  |  |
| I62.00 | Nontraumatic subdural hemorrhage, unspecified                    |  |  |
| I62.01 | Nontraumatic acute subdural hemorrhage                           |  |  |
| I62.02 | Nontraumatic subacute subdural hemorrhage                        |  |  |
| I62.1  | Nontraumatic extradural hemorrhage                               |  |  |
| I62.9  | Nontraumatic intracranial hemorrhage, unspecified                |  |  |

### Included and Excluded ICD-10-CM Diagnosis Subcodes for Intracranial Injury Condition Group

| Included ICD-10-CM diagnosis subcodes (n=190) |                                                                                                                                                      | Excluded ICD-10-CM diagnosis subcodes (n=0) |                     |
|-----------------------------------------------|------------------------------------------------------------------------------------------------------------------------------------------------------|---------------------------------------------|---------------------|
| Subcode                                       | Subcode description                                                                                                                                  | Subcode                                     | Subcode description |
| S06.0X0A                                      | Concussion without loss of consciousness, initial encounter                                                                                          |                                             |                     |
| S06.0X1A                                      | Concussion with loss of consciousness of 30 minutes or less, initial encounter                                                                       |                                             |                     |
| S06.0X2A                                      | Concussion with loss of consciousness of 31 minutes to 59 minutes, initial encounter                                                                 |                                             |                     |
| S06.0X3A                                      | Concussion with loss of consciousness of 1 hour to 5 hours 59 minutes, initial encounter                                                             |                                             |                     |
| S06.0X4A                                      | Concussion with loss of consciousness of 6 hours to 24 hours, initial encounter                                                                      |                                             |                     |
| S06.0X5A                                      | Concussion with loss of consciousness greater than 24 hours with return to pre-existing conscious level, initial encounter                           |                                             |                     |
| S06.0X6A                                      | Concussion with loss of consciousness greater than 24 hours without return to pre-existing conscious level with patient surviving, initial encounter |                                             |                     |
| S06.0X7A                                      | Concussion with loss of consciousness of any duration with death due to brain injury prior to regaining consciousness, initial encounter             |                                             |                     |
| S06.0X8A                                      | Concussion with loss of consciousness of any duration with death due to other cause prior to regaining consciousness, initial encounter              |                                             |                     |
| S06.0X9A                                      | Concussion with loss of consciousness of unspecified duration, initial encounter                                                                     |                                             |                     |
| S06.1X0A                                      | Traumatic cerebral edema without loss of consciousness, initial encounter                                                                            |                                             |                     |
| S06.1X1A                                      | Traumatic cerebral edema with loss of consciousness of 30 minutes or less, initial encounter                                                         |                                             |                     |
| S06.1X2A                                      | Traumatic cerebral edema with loss of consciousness of 31 minutes to 59 minutes, initial encounter                                                   |                                             |                     |
| S06.1X3A                                      | Traumatic cerebral edema with loss of consciousness of 1 hour to 5 hours 59 minutes, initial encounter                                               |                                             |                     |
| S06.1X4A                                      | Traumatic cerebral edema with loss of consciousness of 6 hours to 24 hours, initial encounter                                                        |                                             |                     |



|          |                                                                                                                                                                          |  |  |
|----------|--------------------------------------------------------------------------------------------------------------------------------------------------------------------------|--|--|
| S06.1X5A | Traumatic cerebral edema with loss of consciousness greater than 24 hours with return to pre-existing conscious level, initial encounter                                 |  |  |
| S06.1X6A | Traumatic cerebral edema with loss of consciousness greater than 24 hours without return to pre-existing conscious level with patient surviving, initial encounter       |  |  |
| S06.1X7A | Traumatic cerebral edema with loss of consciousness of any duration with death due to brain injury prior to regaining consciousness, initial encounter                   |  |  |
| S06.1X8A | Traumatic cerebral edema with loss of consciousness of any duration with death due to other cause prior to regaining consciousness, initial encounter                    |  |  |
| S06.1X9A | Traumatic cerebral edema with loss of consciousness of unspecified duration, initial encounter                                                                           |  |  |
| S06.2X0A | Diffuse traumatic brain injury without loss of consciousness, initial encounter                                                                                          |  |  |
| S06.2X1A | Diffuse traumatic brain injury with loss of consciousness of 30 minutes or less, initial encounter                                                                       |  |  |
| S06.2X2A | Diffuse traumatic brain injury with loss of consciousness of 31 minutes to 59 minutes, initial encounter                                                                 |  |  |
| S06.2X3A | Diffuse traumatic brain injury with loss of consciousness of 1 hour to 5 hours 59 minutes, initial encounter                                                             |  |  |
| S06.2X4A | Diffuse traumatic brain injury with loss of consciousness of 6 hours to 24 hours, initial encounter                                                                      |  |  |
| S06.2X5A | Diffuse traumatic brain injury with loss of consciousness greater than 24 hours with return to pre-existing conscious levels, initial encounter                          |  |  |
| S06.2X6A | Diffuse traumatic brain injury with loss of consciousness greater than 24 hours without return to pre-existing conscious level with patient surviving, initial encounter |  |  |
| S06.2X7A | Diffuse traumatic brain injury with loss of consciousness of any duration with death due to brain injury prior to regaining consciousness, initial encounter             |  |  |
| S06.2X8A | Diffuse traumatic brain injury with loss of consciousness of any duration with death due to other cause prior to regaining consciousness, initial encounter              |  |  |
| S06.2X9A | Diffuse traumatic brain injury with loss of consciousness of unspecified duration, initial encounter                                                                     |  |  |

|          |                                                                                                                                                                                    |  |  |
|----------|------------------------------------------------------------------------------------------------------------------------------------------------------------------------------------|--|--|
| S06.300A | Unspecified focal traumatic brain injury without loss of consciousness, initial encounter                                                                                          |  |  |
| S06.301A | Unspecified focal traumatic brain injury with loss of consciousness of 30 minutes or less, initial encounter                                                                       |  |  |
| S06.302A | Unspecified focal traumatic brain injury with loss of consciousness of 31 minutes to 59 minutes, initial encounter                                                                 |  |  |
| S06.303A | Unspecified focal traumatic brain injury with loss of consciousness of 1 hour to 5 hours 59 minutes, initial encounter                                                             |  |  |
| S06.304A | Unspecified focal traumatic brain injury with loss of consciousness of 6 hours to 24 hours, initial encounter                                                                      |  |  |
| S06.305A | Unspecified focal traumatic brain injury with loss of consciousness greater than 24 hours with return to pre-existing conscious level, initial encounter                           |  |  |
| S06.306A | Unspecified focal traumatic brain injury with loss of consciousness greater than 24 hours without return to pre-existing conscious level with patient surviving, initial encounter |  |  |
| S06.307A | Unspecified focal traumatic brain injury with loss of consciousness of any duration with death due to brain injury prior to regaining consciousness, initial encounter             |  |  |
| S06.308A | Unspecified focal traumatic brain injury with loss of consciousness of any duration with death due to other cause prior to regaining consciousness, initial encounter              |  |  |
| S06.309A | Unspecified focal traumatic brain injury with loss of consciousness of unspecified duration, initial encounter                                                                     |  |  |
| S06.310A | Contusion and laceration of right cerebrum without loss of consciousness, initial encounter                                                                                        |  |  |
| S06.311A | Contusion and laceration of right cerebrum with loss of consciousness of 30 minutes or less, initial encounter                                                                     |  |  |
| S06.312A | Contusion and laceration of right cerebrum with loss of consciousness of 31 minutes to 59 minutes, initial encounter                                                               |  |  |
| S06.313A | Contusion and laceration of right cerebrum with loss of consciousness of 1 hour to 5 hours 59 minutes, initial encounter                                                           |  |  |
| S06.314A | Contusion and laceration of right cerebrum with loss of consciousness of 6 hours to 24 hours, initial encounter                                                                    |  |  |

|          |                                                                                                                                                                                      |  |  |
|----------|--------------------------------------------------------------------------------------------------------------------------------------------------------------------------------------|--|--|
| S06.315A | Contusion and laceration of right cerebrum with loss of consciousness greater than 24 hours with return to pre-existing conscious level, initial encounter                           |  |  |
| S06.316A | Contusion and laceration of right cerebrum with loss of consciousness greater than 24 hours without return to pre-existing conscious level with patient surviving, initial encounter |  |  |
| S06.317A | Contusion and laceration of right cerebrum with loss of consciousness of any duration with death due to brain injury prior to regaining consciousness, initial encounter             |  |  |
| S06.318A | Contusion and laceration of right cerebrum with loss of consciousness of any duration with death due to other cause prior to regaining consciousness, initial encounter              |  |  |
| S06.319A | Contusion and laceration of right cerebrum with loss of consciousness of unspecified duration, initial encounter                                                                     |  |  |
| S06.320A | Contusion and laceration of left cerebrum without loss of consciousness, initial encounter                                                                                           |  |  |
| S06.321A | Contusion and laceration of left cerebrum with loss of consciousness of 30 minutes or less, initial encounter                                                                        |  |  |
| S06.322A | Contusion and laceration of left cerebrum with loss of consciousness of 31 minutes to 59 minutes, initial encounter                                                                  |  |  |
| S06.323A | Contusion and laceration of left cerebrum with loss of consciousness of 1 hour to 5 hours 59 minutes, initial encounter                                                              |  |  |
| S06.324A | Contusion and laceration of left cerebrum with loss of consciousness of 6 hours to 24 hours, initial encounter                                                                       |  |  |
| S06.325A | Contusion and laceration of left cerebrum with loss of consciousness greater than 24 hours with return to pre-existing conscious level, initial encounter                            |  |  |
| S06.326A | Contusion and laceration of left cerebrum with loss of consciousness greater than 24 hours without return to pre-existing conscious level with patient surviving, initial encounter  |  |  |
| S06.327A | Contusion and laceration of left cerebrum with loss of consciousness of any duration with death due to brain injury prior to regaining consciousness, initial encounter              |  |  |
| S06.328A | Contusion and laceration of left cerebrum with loss of consciousness of any duration with death due to other cause prior to regaining consciousness, initial encounter               |  |  |

|          |                                                                                                                                                                                              |  |  |
|----------|----------------------------------------------------------------------------------------------------------------------------------------------------------------------------------------------|--|--|
| S06.329A | Contusion and laceration of left cerebrum with loss of consciousness of unspecified duration, initial encounter                                                                              |  |  |
| S06.330A | Contusion and laceration of cerebrum, unspecified, without loss of consciousness, initial encounter                                                                                          |  |  |
| S06.331A | Contusion and laceration of cerebrum, unspecified, with loss of consciousness of 30 minutes or less, initial encounter                                                                       |  |  |
| S06.332A | Contusion and laceration of cerebrum, unspecified, with loss of consciousness of 31 minutes to 59 minutes, initial encounter                                                                 |  |  |
| S06.333A | Contusion and laceration of cerebrum, unspecified, with loss of consciousness of 1 hour to 5 hours 59 minutes, initial encounter                                                             |  |  |
| S06.334A | Contusion and laceration of cerebrum, unspecified, with loss of consciousness of 6 hours to 24 hours, initial encounter                                                                      |  |  |
| S06.335A | Contusion and laceration of cerebrum, unspecified, with loss of consciousness greater than 24 hours with return to pre-existing conscious level, initial encounter                           |  |  |
| S06.336A | Contusion and laceration of cerebrum, unspecified, with loss of consciousness greater than 24 hours without return to pre-existing conscious level with patient surviving, initial encounter |  |  |
| S06.337A | Contusion and laceration of cerebrum, unspecified, with loss of consciousness of any duration with death due to brain injury prior to regaining consciousness, initial encounter             |  |  |
| S06.338A | Contusion and laceration of cerebrum, unspecified, with loss of consciousness of any duration with death due to other cause prior to regaining consciousness, initial encounter              |  |  |
| S06.339A | Contusion and laceration of cerebrum, unspecified, with loss of consciousness of unspecified duration, initial encounter                                                                     |  |  |
| S06.340A | Traumatic hemorrhage of right cerebrum without loss of consciousness, initial encounter                                                                                                      |  |  |
| S06.341A | Traumatic hemorrhage of right cerebrum with loss of consciousness of 30 minutes or less, initial encounter                                                                                   |  |  |

|          |                                                                                                                                                                                  |  |  |
|----------|----------------------------------------------------------------------------------------------------------------------------------------------------------------------------------|--|--|
| S06.342A | Traumatic hemorrhage of right cerebrum with loss of consciousness of 31 minutes to 59 minutes, initial encounter                                                                 |  |  |
| S06.343A | Traumatic hemorrhage of right cerebrum with loss of consciousness of 1 hours to 5 hours 59 minutes, initial encounter                                                            |  |  |
| S06.344A | Traumatic hemorrhage of right cerebrum with loss of consciousness of 6 hours to 24 hours, initial encounter                                                                      |  |  |
| S06.345A | Traumatic hemorrhage of right cerebrum with loss of consciousness greater than 24 hours with return to pre-existing conscious level, initial encounter                           |  |  |
| S06.346A | Traumatic hemorrhage of right cerebrum with loss of consciousness greater than 24 hours without return to pre-existing conscious level with patient surviving, initial encounter |  |  |
| S06.347A | Traumatic hemorrhage of right cerebrum with loss of consciousness of any duration with death due to brain injury prior to regaining consciousness, initial encounter             |  |  |
| S06.348A | Traumatic hemorrhage of right cerebrum with loss of consciousness of any duration with death due to other cause prior to regaining consciousness, initial encounter              |  |  |
| S06.349A | Traumatic hemorrhage of right cerebrum with loss of consciousness of unspecified duration, initial encounter                                                                     |  |  |
| S06.350A | Traumatic hemorrhage of left cerebrum without loss of consciousness, initial encounter                                                                                           |  |  |
| S06.351A | Traumatic hemorrhage of left cerebrum with loss of consciousness of 30 minutes or less, initial encounter                                                                        |  |  |
| S06.352A | Traumatic hemorrhage of left cerebrum with loss of consciousness of 31 minutes to 59 minutes, initial encounter                                                                  |  |  |
| S06.353A | Traumatic hemorrhage of left cerebrum with loss of consciousness of 1 hours to 5 hours 59 minutes, initial encounter                                                             |  |  |
| S06.354A | Traumatic hemorrhage of left cerebrum with loss of consciousness of 6 hours to 24 hours, initial encounter                                                                       |  |  |
| S06.355A | Traumatic hemorrhage of left cerebrum with loss of consciousness greater than 24 hours with return to pre-existing conscious level, initial encounter                            |  |  |
| S06.356A | Traumatic hemorrhage of left cerebrum with loss of consciousness greater than 24 hours without return to                                                                         |  |  |

|          |                                                                                                                                                                                          |  |  |
|----------|------------------------------------------------------------------------------------------------------------------------------------------------------------------------------------------|--|--|
|          | pre-existing conscious level with patient surviving, initial encounter                                                                                                                   |  |  |
| S06.357A | Traumatic hemorrhage of left cerebrum with loss of consciousness of any duration with death due to brain injury prior to regaining consciousness, initial encounter                      |  |  |
| S06.358A | Traumatic hemorrhage of left cerebrum with loss of consciousness of any duration with death due to other cause prior to regaining consciousness, initial encounter                       |  |  |
| S06.359A | Traumatic hemorrhage of left cerebrum with loss of consciousness of unspecified duration, initial encounter                                                                              |  |  |
| S06.360A | Traumatic hemorrhage of cerebrum, unspecified, without loss of consciousness, initial encounter                                                                                          |  |  |
| S06.361A | Traumatic hemorrhage of cerebrum, unspecified, with loss of consciousness of 30 minutes or less, initial encounter                                                                       |  |  |
| S06.362A | Traumatic hemorrhage of cerebrum, unspecified, with loss of consciousness of 31 minutes to 59 minutes, initial encounter                                                                 |  |  |
| S06.363A | Traumatic hemorrhage of cerebrum, unspecified, with loss of consciousness of 1 hours to 5 hours 59 minutes, initial encounter                                                            |  |  |
| S06.364A | Traumatic hemorrhage of cerebrum, unspecified, with loss of consciousness of 6 hours to 24 hours, initial encounter                                                                      |  |  |
| S06.365A | Traumatic hemorrhage of cerebrum, unspecified, with loss of consciousness greater than 24 hours with return to pre-existing conscious level, initial encounter                           |  |  |
| S06.366A | Traumatic hemorrhage of cerebrum, unspecified, with loss of consciousness greater than 24 hours without return to pre-existing conscious level with patient surviving, initial encounter |  |  |
| S06.367A | Traumatic hemorrhage of cerebrum, unspecified, with loss of consciousness of any duration with death due to brain injury prior to regaining consciousness, initial encounter             |  |  |
| S06.368A | Traumatic hemorrhage of cerebrum, unspecified, with loss of consciousness of any duration with death due to other cause prior to regaining consciousness, initial encounter              |  |  |

|          |                                                                                                                                                                                               |  |  |
|----------|-----------------------------------------------------------------------------------------------------------------------------------------------------------------------------------------------|--|--|
| S06.369A | Traumatic hemorrhage of cerebrum, unspecified, with loss of consciousness of unspecified duration, initial encounter                                                                          |  |  |
| S06.370A | Contusion, laceration, and hemorrhage of cerebellum without loss of consciousness, initial encounter                                                                                          |  |  |
| S06.371A | Contusion, laceration, and hemorrhage of cerebellum with loss of consciousness of 30 minutes or less, initial encounter                                                                       |  |  |
| S06.372A | Contusion, laceration, and hemorrhage of cerebellum with loss of consciousness of 31 minutes to 59 minutes, initial encounter                                                                 |  |  |
| S06.373A | Contusion, laceration, and hemorrhage of cerebellum with loss of consciousness of 1 hour to 5 hours 59 minutes, initial encounter                                                             |  |  |
| S06.374A | Contusion, laceration, and hemorrhage of cerebellum with loss of consciousness of 6 hours to 24 hours, initial encounter                                                                      |  |  |
| S06.375A | Contusion, laceration, and hemorrhage of cerebellum with loss of consciousness greater than 24 hours with return to pre-existing conscious level, initial encounter                           |  |  |
| S06.376A | Contusion, laceration, and hemorrhage of cerebellum with loss of consciousness greater than 24 hours without return to pre-existing conscious level with patient surviving, initial encounter |  |  |
| S06.377A | Contusion, laceration, and hemorrhage of cerebellum with loss of consciousness of any duration with death due to brain injury prior to regaining consciousness, initial encounter             |  |  |
| S06.378A | Contusion, laceration, and hemorrhage of cerebellum with loss of consciousness of any duration with death due to other cause prior to regaining consciousness, initial encounter              |  |  |
| S06.379A | Contusion, laceration, and hemorrhage of cerebellum with loss of consciousness of unspecified duration, initial encounter                                                                     |  |  |
| S06.380A | Contusion, laceration, and hemorrhage of brainstem without loss of consciousness, initial encounter                                                                                           |  |  |
| S06.381A | Contusion, laceration, and hemorrhage of brainstem with loss of consciousness of 30 minutes or less, initial encounter                                                                        |  |  |

|          |                                                                                                                                                                                              |  |  |
|----------|----------------------------------------------------------------------------------------------------------------------------------------------------------------------------------------------|--|--|
| S06.382A | Contusion, laceration, and hemorrhage of brainstem with loss of consciousness of 31 minutes to 59 minutes, initial encounter                                                                 |  |  |
| S06.383A | Contusion, laceration, and hemorrhage of brainstem with loss of consciousness of 1 hour to 5 hours 59 minutes, initial encounter                                                             |  |  |
| S06.384A | Contusion, laceration, and hemorrhage of brainstem with loss of consciousness of 6 hours to 24 hours, initial encounter                                                                      |  |  |
| S06.385A | Contusion, laceration, and hemorrhage of brainstem with loss of consciousness greater than 24 hours with return to pre-existing conscious level, initial encounter                           |  |  |
| S06.386A | Contusion, laceration, and hemorrhage of brainstem with loss of consciousness greater than 24 hours without return to pre-existing conscious level with patient surviving, initial encounter |  |  |
| S06.387A | Contusion, laceration, and hemorrhage of brainstem with loss of consciousness of any duration with death due to brain injury prior to regaining consciousness, initial encounter             |  |  |
| S06.388A | Contusion, laceration, and hemorrhage of brainstem with loss of consciousness of any duration with death due to other cause prior to regaining consciousness, initial encounter              |  |  |
| S06.389A | Contusion, laceration, and hemorrhage of brainstem with loss of consciousness of unspecified duration, initial encounter                                                                     |  |  |
| S06.4X0A | Epidural hemorrhage without loss of consciousness, initial encounter                                                                                                                         |  |  |
| S06.4X1A | Epidural hemorrhage with loss of consciousness of 30 minutes or less, initial encounter                                                                                                      |  |  |
| S06.4X2A | Epidural hemorrhage with loss of consciousness of 31 minutes to 59 minutes, initial encounter                                                                                                |  |  |
| S06.4X3A | Epidural hemorrhage with loss of consciousness of 1 hour to 5 hours 59 minutes, initial encounter                                                                                            |  |  |
| S06.4X4A | Epidural hemorrhage with loss of consciousness of 6 hours to 24 hours, initial encounter                                                                                                     |  |  |
| S06.4X5A | Epidural hemorrhage with loss of consciousness greater than 24 hours with return to pre-existing conscious level, initial encounter                                                          |  |  |



|          |                                                                                                                                                                         |  |  |
|----------|-------------------------------------------------------------------------------------------------------------------------------------------------------------------------|--|--|
| S06.4X6A | Epidural hemorrhage with loss of consciousness greater than 24 hours without return to pre-existing conscious level with patient surviving, initial encounter           |  |  |
| S06.4X7A | Epidural hemorrhage with loss of consciousness of any duration with death due to brain injury prior to regaining consciousness, initial encounter                       |  |  |
| S06.4X8A | Epidural hemorrhage with loss of consciousness of any duration with death due to other causes prior to regaining consciousness, initial encounter                       |  |  |
| S06.4X9A | Epidural hemorrhage with loss of consciousness of unspecified duration, initial encounter                                                                               |  |  |
| S06.5X0A | Traumatic subdural hemorrhage without loss of consciousness, initial encounter                                                                                          |  |  |
| S06.5X1A | Traumatic subdural hemorrhage with loss of consciousness of 30 minutes or less, initial encounter                                                                       |  |  |
| S06.5X2A | Traumatic subdural hemorrhage with loss of consciousness of 31 minutes to 59 minutes, initial encounter                                                                 |  |  |
| S06.5X3A | Traumatic subdural hemorrhage with loss of consciousness of 1 hour to 5 hours 59 minutes, initial encounter                                                             |  |  |
| S06.5X4A | Traumatic subdural hemorrhage with loss of consciousness of 6 hours to 24 hours, initial encounter                                                                      |  |  |
| S06.5X5A | Traumatic subdural hemorrhage with loss of consciousness greater than 24 hours with return to pre-existing conscious level, initial encounter                           |  |  |
| S06.5X6A | Traumatic subdural hemorrhage with loss of consciousness greater than 24 hours without return to pre-existing conscious level with patient surviving, initial encounter |  |  |
| S06.5X7A | Traumatic subdural hemorrhage with loss of consciousness of any duration with death due to brain injury before regaining consciousness, initial encounter               |  |  |
| S06.5X8A | Traumatic subdural hemorrhage with loss of consciousness of any duration with death due to other cause before regaining consciousness, initial encounter                |  |  |
| S06.5X9A | Traumatic subdural hemorrhage with loss of consciousness of unspecified duration, initial encounter                                                                     |  |  |
| S06.6X0A | Traumatic subarachnoid hemorrhage without loss of consciousness, initial encounter                                                                                      |  |  |

|          |                                                                                                                                                                             |  |  |
|----------|-----------------------------------------------------------------------------------------------------------------------------------------------------------------------------|--|--|
| S06.6X1A | Traumatic subarachnoid hemorrhage with loss of consciousness of 30 minutes or less, initial encounter                                                                       |  |  |
| S06.6X2A | Traumatic subarachnoid hemorrhage with loss of consciousness of 31 minutes to 59 minutes, initial encounter                                                                 |  |  |
| S06.6X3A | Traumatic subarachnoid hemorrhage with loss of consciousness of 1 hour to 5 hours 59 minutes, initial encounter                                                             |  |  |
| S06.6X4A | Traumatic subarachnoid hemorrhage with loss of consciousness of 6 hours to 24 hours, initial encounter                                                                      |  |  |
| S06.6X5A | Traumatic subarachnoid hemorrhage with loss of consciousness greater than 24 hours with return to pre-existing conscious level, initial encounter                           |  |  |
| S06.6X6A | Traumatic subarachnoid hemorrhage with loss of consciousness greater than 24 hours without return to pre-existing conscious level with patient surviving, initial encounter |  |  |
| S06.6X7A | Traumatic subarachnoid hemorrhage with loss of consciousness of any duration with death due to brain injury prior to regaining consciousness, initial encounter             |  |  |
| S06.6X8A | Traumatic subarachnoid hemorrhage with loss of consciousness of any duration with death due to other cause prior to regaining consciousness, initial encounter              |  |  |
| S06.6X9A | Traumatic subarachnoid hemorrhage with loss of consciousness of unspecified duration, initial encounter                                                                     |  |  |
| S06.810A | Injury of right internal carotid artery, intracranial portion, not elsewhere classified without loss of consciousness, initial encounter                                    |  |  |
| S06.811A | Injury of right internal carotid artery, intracranial portion, not elsewhere classified with loss of consciousness of 30 minutes or less, initial encounter                 |  |  |
| S06.812A | Injury of right internal carotid artery, intracranial portion, not elsewhere classified with loss of consciousness of 31 minutes to 59 minutes, initial encounter           |  |  |
| S06.813A | Injury of right internal carotid artery, intracranial portion, not elsewhere classified with loss of consciousness of 1 hour to 5 hours 59 minutes, initial encounter       |  |  |
| S06.814A | Injury of right internal carotid artery, intracranial portion, not elsewhere classified with loss of consciousness of 6 hours to 24 hours, initial encounter                |  |  |

|          |                                                                                                                                                                                                                                   |  |  |
|----------|-----------------------------------------------------------------------------------------------------------------------------------------------------------------------------------------------------------------------------------|--|--|
| S06.815A | Injury of right internal carotid artery, intracranial portion, not elsewhere classified with loss of consciousness greater than 24 hours with return to pre-existing conscious level, initial encounter                           |  |  |
| S06.816A | Injury of right internal carotid artery, intracranial portion, not elsewhere classified with loss of consciousness greater than 24 hours without return to pre-existing conscious level with patient surviving, initial encounter |  |  |
| S06.817A | Injury of right internal carotid artery, intracranial portion, not elsewhere classified with loss of consciousness of any duration with death due to brain injury prior to regaining consciousness, initial encounter             |  |  |
| S06.818A | Injury of right internal carotid artery, intracranial portion, not elsewhere classified with loss of consciousness of any duration with death due to other cause prior to regaining consciousness, initial encounter              |  |  |
| S06.819A | Injury of right internal carotid artery, intracranial portion, not elsewhere classified with loss of consciousness of unspecified duration, initial encounter                                                                     |  |  |
| S06.820A | Injury of left internal carotid artery, intracranial portion, not elsewhere classified without loss of consciousness, initial encounter                                                                                           |  |  |
| S06.821A | Injury of left internal carotid artery, intracranial portion, not elsewhere classified with loss of consciousness of 30 minutes or less, initial encounter                                                                        |  |  |
| S06.822A | Injury of left internal carotid artery, intracranial portion, not elsewhere classified with loss of consciousness of 31 minutes to 59 minutes, initial encounter                                                                  |  |  |
| S06.823A | Injury of left internal carotid artery, intracranial portion, not elsewhere classified with loss of consciousness of 1 hour to 5 hours 59 minutes, initial encounter                                                              |  |  |
| S06.824A | Injury of left internal carotid artery, intracranial portion, not elsewhere classified with loss of consciousness of 6 hours to 24 hours, initial encounter                                                                       |  |  |
| S06.825A | Injury of left internal carotid artery, intracranial portion, not elsewhere classified with loss of consciousness greater than 24 hours with return to pre-existing conscious level, initial encounter                            |  |  |
| S06.826A | Injury of left internal carotid artery, intracranial portion, not elsewhere classified with loss of consciousness                                                                                                                 |  |  |

|          |                                                                                                                                                                                                                      |  |  |
|----------|----------------------------------------------------------------------------------------------------------------------------------------------------------------------------------------------------------------------|--|--|
|          | greater than 24 hours without return to pre-existing conscious level with patient surviving, initial encounter                                                                                                       |  |  |
| S06.827A | Injury of left internal carotid artery, intracranial portion, not elsewhere classified with loss of consciousness of any duration with death due to brain injury prior to regaining consciousness, initial encounter |  |  |
| S06.828A | Injury of left internal carotid artery, intracranial portion, not elsewhere classified with loss of consciousness of any duration with death due to other cause prior to regaining consciousness, initial encounter  |  |  |
| S06.829A | Injury of left internal carotid artery, intracranial portion, not elsewhere classified with loss of consciousness of unspecified duration, initial encounter                                                         |  |  |
| S06.890A | Other specified intracranial injury without loss of consciousness, initial encounter                                                                                                                                 |  |  |
| S06.891A | Other specified intracranial injury with loss of consciousness of 30 minutes or less, initial encounter                                                                                                              |  |  |
| S06.892A | Other specified intracranial injury with loss of consciousness of 31 minutes to 59 minutes, initial encounter                                                                                                        |  |  |
| S06.893A | Other specified intracranial injury with loss of consciousness of 1 hour to 5 hours 59 minutes, initial encounter                                                                                                    |  |  |
| S06.894A | Other specified intracranial injury with loss of consciousness of 6 hours to 24 hours, initial encounter                                                                                                             |  |  |
| S06.895A | Other specified intracranial injury with loss of consciousness greater than 24 hours with return to pre-existing conscious level, initial encounter                                                                  |  |  |
| S06.896A | Other specified intracranial injury with loss of consciousness greater than 24 hours without return to pre-existing conscious level with patient surviving, initial encounter                                        |  |  |
| S06.897A | Other specified intracranial injury with loss of consciousness of any duration with death due to brain injury prior to regaining consciousness, initial encounter                                                    |  |  |
| S06.898A | Other specified intracranial injury with loss of consciousness of any duration with death due to other cause prior to regaining consciousness, initial encounter                                                     |  |  |
| S06.899A | Other specified intracranial injury with loss of consciousness of unspecified duration, initial encounter                                                                                                            |  |  |

|          |                                                                                                                                                                           |  |  |
|----------|---------------------------------------------------------------------------------------------------------------------------------------------------------------------------|--|--|
| S06.9X0A | Unspecified intracranial injury without loss of consciousness, initial encounter                                                                                          |  |  |
| S06.9X1A | Unspecified intracranial injury with loss of consciousness of 30 minutes or less, initial encounter                                                                       |  |  |
| S06.9X2A | Unspecified intracranial injury with loss of consciousness of 31 minutes to 59 minutes, initial encounter                                                                 |  |  |
| S06.9X3A | Unspecified intracranial injury with loss of consciousness of 1 hour to 5 hours 59 minutes, initial encounter                                                             |  |  |
| S06.9X4A | Unspecified intracranial injury with loss of consciousness of 6 hours to 24 hours, initial encounter                                                                      |  |  |
| S06.9X5A | Unspecified intracranial injury with loss of consciousness greater than 24 hours with return to pre-existing conscious level, initial encounter                           |  |  |
| S06.9X6A | Unspecified intracranial injury with loss of consciousness greater than 24 hours without return to pre-existing conscious level with patient surviving, initial encounter |  |  |
| S06.9X7A | Unspecified intracranial injury with loss of consciousness of any duration with death due to brain injury prior to regaining consciousness, initial encounter             |  |  |
| S06.9X8A | Unspecified intracranial injury with loss of consciousness of any duration with death due to other cause prior to regaining consciousness, initial encounter              |  |  |
| S06.9X9A | Unspecified intracranial injury with loss of consciousness of unspecified duration, initial encounter                                                                     |  |  |

### Included and Excluded ICD-10-CM Diagnosis Subcodes for Meningitis Condition Group

| Included ICD-10-CM diagnosis subcodes (n=19) |                                                                            | Excluded ICD-10-CM diagnosis subcodes (n=2) |                                        |
|----------------------------------------------|----------------------------------------------------------------------------|---------------------------------------------|----------------------------------------|
| Subcode                                      | Subcode description                                                        | Subcode                                     | Subcode description                    |
| A01.01                                       | Typhoid meningitis                                                         | G03.1                                       | Chronic meningitis                     |
| A02.21                                       | Salmonella meningitis                                                      | G03.2                                       | Benign recurrent meningitis [Mollaret] |
| A20.3                                        | Plague meningitis                                                          |                                             |                                        |
| A32.11                                       | Listerial meningitis                                                       |                                             |                                        |
| A39.0                                        | Meningococcal meningitis                                                   |                                             |                                        |
| A42.81                                       | Actinomycotic meningitis                                                   |                                             |                                        |
| A54.81                                       | Gonococcal meningitis                                                      |                                             |                                        |
| B37.5                                        | Candidal meningitis                                                        |                                             |                                        |
| G00.0                                        | Hemophilus meningitis                                                      |                                             |                                        |
| G00.1                                        | Pneumococcal meningitis                                                    |                                             |                                        |
| G00.2                                        | Streptococcal meningitis                                                   |                                             |                                        |
| G00.3                                        | Staphylococcal meningitis                                                  |                                             |                                        |
| G00.8                                        | Other bacterial meningitis                                                 |                                             |                                        |
| G00.9                                        | Bacterial meningitis, unspecified                                          |                                             |                                        |
| G01.                                         | Meningitis in bacterial diseases classified elsewhere                      |                                             |                                        |
| G02.                                         | Meningitis in other infectious and parasitic diseases classified elsewhere |                                             |                                        |
| G03.0                                        | Nonpyogenic meningitis                                                     |                                             |                                        |
| G03.8                                        | Meningitis due to other specified causes                                   |                                             |                                        |
| G03.9                                        | Meningitis, unspecified                                                    |                                             |                                        |

## Included and Excluded ICD-10-CM Diagnosis Subcodes for Moderate-Severe Burns and Corrosions Condition Group

| Included ICD-10-CM diagnosis subcodes (n=548) |                                                                                         | Excluded ICD-10-CM diagnosis subcodes (n=0) |                     |
|-----------------------------------------------|-----------------------------------------------------------------------------------------|---------------------------------------------|---------------------|
| Subcode                                       | Subcode description                                                                     | Subcode                                     | Subcode description |
| T20.20XA                                      | Burn of second degree of head, face, and neck, unspecified site, initial encounter      |                                             |                     |
| T20.211A                                      | Burn of second degree of right ear [any part, except ear drum], initial encounter       |                                             |                     |
| T20.212A                                      | Burn of second degree of left ear [any part, except ear drum], initial encounter        |                                             |                     |
| T20.219A                                      | Burn of second degree of unspecified ear [any part, except ear drum], initial encounter |                                             |                     |
| T20.22XA                                      | Burn of second degree of lip(s), initial encounter                                      |                                             |                     |
| T20.23XA                                      | Burn of second degree of chin, initial encounter                                        |                                             |                     |
| T20.24XA                                      | Burn of second degree of nose (septum), initial encounter                               |                                             |                     |
| T20.25XA                                      | Burn of second degree of scalp [any part], initial encounter                            |                                             |                     |
| T20.26XA                                      | Burn of second degree of forehead and cheek, initial encounter                          |                                             |                     |
| T20.27XA                                      | Burn of second degree of neck, initial encounter                                        |                                             |                     |
| T20.29XA                                      | Burn of second degree of multiple sites of head, face, and neck, initial encounter      |                                             |                     |
| T20.30XA                                      | Burn of third degree of head, face, and neck, unspecified site, initial encounter       |                                             |                     |
| T20.311A                                      | Burn of third degree of right ear [any part, except ear drum], initial encounter        |                                             |                     |
| T20.312A                                      | Burn of third degree of left ear [any part, except ear drum], initial encounter         |                                             |                     |
| T20.319A                                      | Burn of third degree of unspecified ear [any part, except ear drum], initial encounter  |                                             |                     |
| T20.32XA                                      | Burn of third degree of lip(s), initial encounter                                       |                                             |                     |
| T20.33XA                                      | Burn of third degree of chin, initial encounter                                         |                                             |                     |
| T20.34XA                                      | Burn of third degree of nose (septum), initial encounter                                |                                             |                     |
| T20.35XA                                      | Burn of third degree of scalp [any part], initial encounter                             |                                             |                     |

|          |                                                                                              |  |  |
|----------|----------------------------------------------------------------------------------------------|--|--|
| T20.36XA | Burn of third degree of forehead and cheek, initial encounter                                |  |  |
| T20.37XA | Burn of third degree of neck, initial encounter                                              |  |  |
| T20.39XA | Burn of third degree of multiple sites of head, face, and neck, initial encounter            |  |  |
| T20.60XA | Corrosion of second degree of head, face, and neck, unspecified site, initial encounter      |  |  |
| T20.611A | Corrosion of second degree of right ear [any part, except ear drum], initial encounter       |  |  |
| T20.612A | Corrosion of second degree of left ear [any part, except ear drum], initial encounter        |  |  |
| T20.619A | Corrosion of second degree of unspecified ear [any part, except ear drum], initial encounter |  |  |
| T20.62XA | Corrosion of second degree of lip(s), initial encounter                                      |  |  |
| T20.63XA | Corrosion of second degree of chin, initial encounter                                        |  |  |
| T20.64XA | Corrosion of second degree of nose (septum), initial encounter                               |  |  |
| T20.65XA | Corrosion of second degree of scalp [any part], initial encounter                            |  |  |
| T20.66XA | Corrosion of second degree of forehead and cheek, initial encounter                          |  |  |
| T20.67XA | Corrosion of second degree of neck, initial encounter                                        |  |  |
| T20.69XA | Corrosion of second degree of multiple sites of head, face, and neck, initial encounter      |  |  |
| T20.70XA | Corrosion of third degree of head, face, and neck, unspecified site, initial encounter       |  |  |
| T20.711A | Corrosion of third degree of right ear [any part, except ear drum], initial encounter        |  |  |
| T20.712A | Corrosion of third degree of left ear [any part, except ear drum], initial encounter         |  |  |
| T20.719A | Corrosion of third degree of unspecified ear [any part, except ear drum], initial encounter  |  |  |
| T20.72XA | Corrosion of third degree of lip(s), initial encounter                                       |  |  |
| T20.73XA | Corrosion of third degree of chin, initial encounter                                         |  |  |
| T20.74XA | Corrosion of third degree of nose (septum), initial encounter                                |  |  |
| T20.75XA | Corrosion of third degree of scalp [any part], initial encounter                             |  |  |



|          |                                                                                        |  |  |
|----------|----------------------------------------------------------------------------------------|--|--|
| T20.76XA | Corrosion of third degree of forehead and cheek, initial encounter                     |  |  |
| T20.77XA | Corrosion of third degree of neck, initial encounter                                   |  |  |
| T20.79XA | Corrosion of third degree of multiple sites of head, face, and neck, initial encounter |  |  |
| T21.20XA | Burn of second degree of trunk, unspecified site, initial encounter                    |  |  |
| T21.21XA | Burn of second degree of chest wall, initial encounter                                 |  |  |
| T21.22XA | Burn of second degree of abdominal wall, initial encounter                             |  |  |
| T21.23XA | Burn of second degree of upper back, initial encounter                                 |  |  |
| T21.24XA | Burn of second degree of lower back, initial encounter                                 |  |  |
| T21.25XA | Burn of second degree of buttock, initial encounter                                    |  |  |
| T21.26XA | Burn of second degree of male genital region, initial encounter                        |  |  |
| T21.27XA | Burn of second degree of female genital region, initial encounter                      |  |  |
| T21.29XA | Burn of second degree of other site of trunk, initial encounter                        |  |  |
| T21.30XA | Burn of third degree of trunk, unspecified site, initial encounter                     |  |  |
| T21.31XA | Burn of third degree of chest wall, initial encounter                                  |  |  |
| T21.32XA | Burn of third degree of abdominal wall, initial encounter                              |  |  |
| T21.33XA | Burn of third degree of upper back, initial encounter                                  |  |  |
| T21.34XA | Burn of third degree of lower back, initial encounter                                  |  |  |
| T21.35XA | Burn of third degree of buttock, initial encounter                                     |  |  |
| T21.36XA | Burn of third degree of male genital region, initial encounter                         |  |  |
| T21.37XA | Burn of third degree of female genital region, initial encounter                       |  |  |
| T21.39XA | Burn of third degree of other site of trunk, initial encounter                         |  |  |
| T21.60XA | Corrosion of second degree of trunk, unspecified site, initial encounter               |  |  |
| T21.61XA | Corrosion of second degree of chest wall, initial encounter                            |  |  |
| T21.62XA | Corrosion of second degree of abdominal wall, initial encounter                        |  |  |

|          |                                                                                                              |  |  |
|----------|--------------------------------------------------------------------------------------------------------------|--|--|
| T21.63XA | Corrosion of second degree of upper back, initial encounter                                                  |  |  |
| T21.64XA | Corrosion of second degree of lower back, initial encounter                                                  |  |  |
| T21.65XA | Corrosion of second degree of buttock, initial encounter                                                     |  |  |
| T21.66XA | Corrosion of second degree of male genital region, initial encounter                                         |  |  |
| T21.67XA | Corrosion of second degree of female genital region, initial encounter                                       |  |  |
| T21.69XA | Corrosion of second degree of other site of trunk, initial encounter                                         |  |  |
| T21.70XA | Corrosion of third degree of trunk, unspecified site, initial encounter                                      |  |  |
| T21.71XA | Corrosion of third degree of chest wall, initial encounter                                                   |  |  |
| T21.72XA | Corrosion of third degree of abdominal wall, initial encounter                                               |  |  |
| T21.73XA | Corrosion of third degree of upper back, initial encounter                                                   |  |  |
| T21.74XA | Corrosion of third degree of lower back, initial encounter                                                   |  |  |
| T21.75XA | Corrosion of third degree of buttock, initial encounter                                                      |  |  |
| T21.76XA | Corrosion of third degree of male genital region, initial encounter                                          |  |  |
| T21.77XA | Corrosion of third degree of female genital region, initial encounter                                        |  |  |
| T21.79XA | Corrosion of third degree of other site of trunk, initial encounter                                          |  |  |
| T22.20XA | Burn of second degree of shoulder and upper limb, except wrist and hand, unspecified site, initial encounter |  |  |
| T22.211A | Burn of second degree of right forearm, initial encounter                                                    |  |  |
| T22.212A | Burn of second degree of left forearm, initial encounter                                                     |  |  |
| T22.219A | Burn of second degree of unspecified forearm, initial encounter                                              |  |  |
| T22.221A | Burn of second degree of right elbow, initial encounter                                                      |  |  |
| T22.222A | Burn of second degree of left elbow, initial encounter                                                       |  |  |
| T22.229A | Burn of second degree of unspecified elbow, initial encounter                                                |  |  |
| T22.231A | Burn of second degree of right upper arm, initial encounter                                                  |  |  |
| T22.232A | Burn of second degree of left upper arm, initial encounter                                                   |  |  |

|          |                                                                                                                          |  |  |
|----------|--------------------------------------------------------------------------------------------------------------------------|--|--|
| T22.239A | Burn of second degree of unspecified upper arm, initial encounter                                                        |  |  |
| T22.241A | Burn of second degree of right axilla, initial encounter                                                                 |  |  |
| T22.242A | Burn of second degree of left axilla, initial encounter                                                                  |  |  |
| T22.249A | Burn of second degree of unspecified axilla, initial encounter                                                           |  |  |
| T22.251A | Burn of second degree of right shoulder, initial encounter                                                               |  |  |
| T22.252A | Burn of second degree of left shoulder, initial encounter                                                                |  |  |
| T22.259A | Burn of second degree of unspecified shoulder, initial encounter                                                         |  |  |
| T22.261A | Burn of second degree of right scapular region, initial encounter                                                        |  |  |
| T22.262A | Burn of second degree of left scapular region, initial encounter                                                         |  |  |
| T22.269A | Burn of second degree of unspecified scapular region, initial encounter                                                  |  |  |
| T22.291A | Burn of second degree of multiple sites of right shoulder and upper limb, except wrist and hand, initial encounter       |  |  |
| T22.292A | Burn of second degree of multiple sites of left shoulder and upper limb, except wrist and hand, initial encounter        |  |  |
| T22.299A | Burn of second degree of multiple sites of unspecified shoulder and upper limb, except wrist and hand, initial encounter |  |  |
| T22.30XA | Burn of third degree of shoulder and upper limb, except wrist and hand, unspecified site, initial encounter              |  |  |
| T22.311A | Burn of third degree of right forearm, initial encounter                                                                 |  |  |
| T22.312A | Burn of third degree of left forearm, initial encounter                                                                  |  |  |
| T22.319A | Burn of third degree of unspecified forearm, initial encounter                                                           |  |  |
| T22.321A | Burn of third degree of right elbow, initial encounter                                                                   |  |  |
| T22.322A | Burn of third degree of left elbow, initial encounter                                                                    |  |  |
| T22.329A | Burn of third degree of unspecified elbow, initial encounter                                                             |  |  |
| T22.331A | Burn of third degree of right upper arm, initial encounter                                                               |  |  |
| T22.332A | Burn of third degree of left upper arm, initial encounter                                                                |  |  |
| T22.339A | Burn of third degree of unspecified upper arm, initial encounter                                                         |  |  |
| T22.341A | Burn of third degree of right axilla, initial encounter                                                                  |  |  |

|          |                                                                                                                         |  |  |
|----------|-------------------------------------------------------------------------------------------------------------------------|--|--|
| T22.342A | Burn of third degree of left axilla, initial encounter                                                                  |  |  |
| T22.349A | Burn of third degree of unspecified axilla, initial encounter                                                           |  |  |
| T22.351A | Burn of third degree of right shoulder, initial encounter                                                               |  |  |
| T22.352A | Burn of third degree of left shoulder, initial encounter                                                                |  |  |
| T22.359A | Burn of third degree of unspecified shoulder, initial encounter                                                         |  |  |
| T22.361A | Burn of third degree of right scapular region, initial encounter                                                        |  |  |
| T22.362A | Burn of third degree of left scapular region, initial encounter                                                         |  |  |
| T22.369A | Burn of third degree of unspecified scapular region, initial encounter                                                  |  |  |
| T22.391A | Burn of third degree of multiple sites of right shoulder and upper limb, except wrist and hand, initial encounter       |  |  |
| T22.392A | Burn of third degree of multiple sites of left shoulder and upper limb, except wrist and hand, initial encounter        |  |  |
| T22.399A | Burn of third degree of multiple sites of unspecified shoulder and upper limb, except wrist and hand, initial encounter |  |  |
| T22.60XA | Corrosion of second degree of shoulder and upper limb, except wrist and hand, unspecified site, initial encounter       |  |  |
| T22.611A | Corrosion of second degree of right forearm, initial encounter                                                          |  |  |
| T22.612A | Corrosion of second degree of left forearm, initial encounter                                                           |  |  |
| T22.619A | Corrosion of second degree of unspecified forearm, initial encounter                                                    |  |  |
| T22.621A | Corrosion of second degree of right elbow, initial encounter                                                            |  |  |
| T22.622A | Corrosion of second degree of left elbow, initial encounter                                                             |  |  |
| T22.629A | Corrosion of second degree of unspecified elbow, initial encounter                                                      |  |  |
| T22.631A | Corrosion of second degree of right upper arm, initial encounter                                                        |  |  |
| T22.632A | Corrosion of second degree of left upper arm, initial encounter                                                         |  |  |

|          |                                                                                                                               |  |  |
|----------|-------------------------------------------------------------------------------------------------------------------------------|--|--|
| T22.639A | Corrosion of second degree of unspecified upper arm, initial encounter                                                        |  |  |
| T22.641A | Corrosion of second degree of right axilla, initial encounter                                                                 |  |  |
| T22.642A | Corrosion of second degree of left axilla, initial encounter                                                                  |  |  |
| T22.649A | Corrosion of second degree of unspecified axilla, initial encounter                                                           |  |  |
| T22.651A | Corrosion of second degree of right shoulder, initial encounter                                                               |  |  |
| T22.652A | Corrosion of second degree of left shoulder, initial encounter                                                                |  |  |
| T22.659A | Corrosion of second degree of unspecified shoulder, initial encounter                                                         |  |  |
| T22.661A | Corrosion of second degree of right scapular region, initial encounter                                                        |  |  |
| T22.662A | Corrosion of second degree of left scapular region, initial encounter                                                         |  |  |
| T22.669A | Corrosion of second degree of unspecified scapular region, initial encounter                                                  |  |  |
| T22.691A | Corrosion of second degree of multiple sites of right shoulder and upper limb, except wrist and hand, initial encounter       |  |  |
| T22.692A | Corrosion of second degree of multiple sites of left shoulder and upper limb, except wrist and hand, initial encounter        |  |  |
| T22.699A | Corrosion of second degree of multiple sites of unspecified shoulder and upper limb, except wrist and hand, initial encounter |  |  |
| T22.70XA | Corrosion of third degree of shoulder and upper limb, except wrist and hand, unspecified site, initial encounter              |  |  |
| T22.711A | Corrosion of third degree of right forearm, initial encounter                                                                 |  |  |
| T22.712A | Corrosion of third degree of left forearm, initial encounter                                                                  |  |  |
| T22.719A | Corrosion of third degree of unspecified forearm, initial encounter                                                           |  |  |
| T22.721A | Corrosion of third degree of right elbow, initial encounter                                                                   |  |  |
| T22.722A | Corrosion of third degree of left elbow, initial encounter                                                                    |  |  |
| T22.729A | Corrosion of third degree of unspecified elbow, initial encounter                                                             |  |  |

|          |                                                                                                                              |  |  |
|----------|------------------------------------------------------------------------------------------------------------------------------|--|--|
| T22.731A | Corrosion of third degree of right upper arm, initial encounter                                                              |  |  |
| T22.732A | Corrosion of third degree of left upper arm, initial encounter                                                               |  |  |
| T22.739A | Corrosion of third degree of unspecified upper arm, initial encounter                                                        |  |  |
| T22.741A | Corrosion of third degree of right axilla, initial encounter                                                                 |  |  |
| T22.742A | Corrosion of third degree of left axilla, initial encounter                                                                  |  |  |
| T22.749A | Corrosion of third degree of unspecified axilla, initial encounter                                                           |  |  |
| T22.751A | Corrosion of third degree of right shoulder, initial encounter                                                               |  |  |
| T22.752A | Corrosion of third degree of left shoulder, initial encounter                                                                |  |  |
| T22.759A | Corrosion of third degree of unspecified shoulder, initial encounter                                                         |  |  |
| T22.761A | Corrosion of third degree of right scapular region, initial encounter                                                        |  |  |
| T22.762A | Corrosion of third degree of left scapular region, initial encounter                                                         |  |  |
| T22.769A | Corrosion of third degree of unspecified scapular region, initial encounter                                                  |  |  |
| T22.791A | Corrosion of third degree of multiple sites of right shoulder and upper limb, except wrist and hand, initial encounter       |  |  |
| T22.792A | Corrosion of third degree of multiple sites of left shoulder and upper limb, except wrist and hand, initial encounter        |  |  |
| T22.799A | Corrosion of third degree of multiple sites of unspecified shoulder and upper limb, except wrist and hand, initial encounter |  |  |
| T23.201A | Burn of second degree of right hand, unspecified site, initial encounter                                                     |  |  |
| T23.202A | Burn of second degree of left hand, unspecified site, initial encounter                                                      |  |  |
| T23.209A | Burn of second degree of unspecified hand, unspecified site, initial encounter                                               |  |  |
| T23.211A | Burn of second degree of right thumb (nail), initial encounter                                                               |  |  |

|          |                                                                                                      |  |  |
|----------|------------------------------------------------------------------------------------------------------|--|--|
| T23.212A | Burn of second degree of left thumb (nail), initial encounter                                        |  |  |
| T23.219A | Burn of second degree of unspecified thumb (nail), initial encounter                                 |  |  |
| T23.221A | Burn of second degree of single right finger (nail) except thumb, initial encounter                  |  |  |
| T23.222A | Burn of second degree of single left finger (nail) except thumb, initial encounter                   |  |  |
| T23.229A | Burn of second degree of unspecified single finger (nail) except thumb, initial encounter            |  |  |
| T23.231A | Burn of second degree of multiple right fingers (nail), not including thumb, initial encounter       |  |  |
| T23.232A | Burn of second degree of multiple left fingers (nail), not including thumb, initial encounter        |  |  |
| T23.239A | Burn of second degree of unspecified multiple fingers (nail), not including thumb, initial encounter |  |  |
| T23.241A | Burn of second degree of multiple right fingers (nail), including thumb, initial encounter           |  |  |
| T23.242A | Burn of second degree of multiple left fingers (nail), including thumb, initial encounter            |  |  |
| T23.249A | Burn of second degree of unspecified multiple fingers (nail), including thumb, initial encounter     |  |  |
| T23.251A | Burn of second degree of right palm, initial encounter                                               |  |  |
| T23.252A | Burn of second degree of left palm, initial encounter                                                |  |  |
| T23.259A | Burn of second degree of unspecified palm, initial encounter                                         |  |  |
| T23.261A | Burn of second degree of back of right hand, initial encounter                                       |  |  |
| T23.262A | Burn of second degree of back of left hand, initial encounter                                        |  |  |
| T23.269A | Burn of second degree of back of unspecified hand, initial encounter                                 |  |  |
| T23.271A | Burn of second degree of right wrist, initial encounter                                              |  |  |
| T23.272A | Burn of second degree of left wrist, initial encounter                                               |  |  |
| T23.279A | Burn of second degree of unspecified wrist, initial encounter                                        |  |  |
| T23.291A | Burn of second degree of multiple sites of right wrist and hand, initial encounter                   |  |  |

|          |                                                                                                     |  |  |
|----------|-----------------------------------------------------------------------------------------------------|--|--|
| T23.292A | Burn of second degree of multiple sites of left wrist and hand, initial encounter                   |  |  |
| T23.299A | Burn of second degree of multiple sites of unspecified wrist and hand, initial encounter            |  |  |
| T23.301A | Burn of third degree of right hand, unspecified site, initial encounter                             |  |  |
| T23.302A | Burn of third degree of left hand, unspecified site, initial encounter                              |  |  |
| T23.309A | Burn of third degree of unspecified hand, unspecified site, initial encounter                       |  |  |
| T23.311A | Burn of third degree of right thumb (nail), initial encounter                                       |  |  |
| T23.312A | Burn of third degree of left thumb (nail), initial encounter                                        |  |  |
| T23.319A | Burn of third degree of unspecified thumb (nail), initial encounter                                 |  |  |
| T23.321A | Burn of third degree of single right finger (nail) except thumb, initial encounter                  |  |  |
| T23.322A | Burn of third degree of single left finger (nail) except thumb, initial encounter                   |  |  |
| T23.329A | Burn of third degree of unspecified single finger (nail) except thumb, initial encounter            |  |  |
| T23.331A | Burn of third degree of multiple right fingers (nail), not including thumb, initial encounter       |  |  |
| T23.332A | Burn of third degree of multiple left fingers (nail), not including thumb, initial encounter        |  |  |
| T23.339A | Burn of third degree of unspecified multiple fingers (nail), not including thumb, initial encounter |  |  |
| T23.341A | Burn of third degree of multiple right fingers (nail), including thumb, initial encounter           |  |  |
| T23.342A | Burn of third degree of multiple left fingers (nail), including thumb, initial encounter            |  |  |
| T23.349A | Burn of third degree of unspecified multiple fingers (nail), including thumb, initial encounter     |  |  |
| T23.351A | Burn of third degree of right palm, initial encounter                                               |  |  |
| T23.352A | Burn of third degree of left palm, initial encounter                                                |  |  |
| T23.359A | Burn of third degree of unspecified palm, initial encounter                                         |  |  |
| T23.361A | Burn of third degree of back of right hand, initial encounter                                       |  |  |
| T23.362A | Burn of third degree of back of left hand, initial encounter                                        |  |  |



|          |                                                                                                           |  |  |
|----------|-----------------------------------------------------------------------------------------------------------|--|--|
| T23.369A | Burn of third degree of back of unspecified hand, initial encounter                                       |  |  |
| T23.371A | Burn of third degree of right wrist, initial encounter                                                    |  |  |
| T23.372A | Burn of third degree of left wrist, initial encounter                                                     |  |  |
| T23.379A | Burn of third degree of unspecified wrist, initial encounter                                              |  |  |
| T23.391A | Burn of third degree of multiple sites of right wrist and hand, initial encounter                         |  |  |
| T23.392A | Burn of third degree of multiple sites of left wrist and hand, initial encounter                          |  |  |
| T23.399A | Burn of third degree of multiple sites of unspecified wrist and hand, initial encounter                   |  |  |
| T23.601A | Corrosion of second degree of right hand, unspecified site, initial encounter                             |  |  |
| T23.602A | Corrosion of second degree of left hand, unspecified site, initial encounter                              |  |  |
| T23.609A | Corrosion of second degree of unspecified hand, unspecified site, initial encounter                       |  |  |
| T23.611A | Corrosion of second degree of right thumb (nail), initial encounter                                       |  |  |
| T23.612A | Corrosion of second degree of left thumb (nail), initial encounter                                        |  |  |
| T23.619A | Corrosion of second degree of unspecified thumb (nail), initial encounter                                 |  |  |
| T23.621A | Corrosion of second degree of single right finger (nail) except thumb, initial encounter                  |  |  |
| T23.622A | Corrosion of second degree of single left finger (nail) except thumb, initial encounter                   |  |  |
| T23.629A | Corrosion of second degree of unspecified single finger (nail) except thumb, initial encounter            |  |  |
| T23.631A | Corrosion of second degree of multiple right fingers (nail), not including thumb, initial encounter       |  |  |
| T23.632A | Corrosion of second degree of multiple left fingers (nail), not including thumb, initial encounter        |  |  |
| T23.639A | Corrosion of second degree of unspecified multiple fingers (nail), not including thumb, initial encounter |  |  |
| T23.641A | Corrosion of second degree of multiple right fingers (nail), including thumb, initial encounter           |  |  |
| T23.642A | Corrosion of second degree of multiple left fingers (nail), including thumb, initial encounter            |  |  |

|          |                                                                                                       |  |  |
|----------|-------------------------------------------------------------------------------------------------------|--|--|
| T23.649A | Corrosion of second degree of unspecified multiple fingers (nail), including thumb, initial encounter |  |  |
| T23.651A | Corrosion of second degree of right palm, initial encounter                                           |  |  |
| T23.652A | Corrosion of second degree of left palm, initial encounter                                            |  |  |
| T23.659A | Corrosion of second degree of unspecified palm, initial encounter                                     |  |  |
| T23.661A | Corrosion of second degree back of right hand, initial encounter                                      |  |  |
| T23.662A | Corrosion of second degree back of left hand, initial encounter                                       |  |  |
| T23.669A | Corrosion of second degree back of unspecified hand, initial encounter                                |  |  |
| T23.671A | Corrosion of second degree of right wrist, initial encounter                                          |  |  |
| T23.672A | Corrosion of second degree of left wrist, initial encounter                                           |  |  |
| T23.679A | Corrosion of second degree of unspecified wrist, initial encounter                                    |  |  |
| T23.691A | Corrosion of second degree of multiple sites of right wrist and hand, initial encounter               |  |  |
| T23.692A | Corrosion of second degree of multiple sites of left wrist and hand, initial encounter                |  |  |
| T23.699A | Corrosion of second degree of multiple sites of unspecified wrist and hand, initial encounter         |  |  |
| T23.701A | Corrosion of third degree of right hand, unspecified site, initial encounter                          |  |  |
| T23.702A | Corrosion of third degree of left hand, unspecified site, initial encounter                           |  |  |
| T23.709A | Corrosion of third degree of unspecified hand, unspecified site, initial encounter                    |  |  |
| T23.711A | Corrosion of third degree of right thumb (nail), initial encounter                                    |  |  |
| T23.712A | Corrosion of third degree of left thumb (nail), initial encounter                                     |  |  |
| T23.719A | Corrosion of third degree of unspecified thumb (nail), initial encounter                              |  |  |
| T23.721A | Corrosion of third degree of single right finger (nail) except thumb, initial encounter               |  |  |

|          |                                                                                                          |  |  |
|----------|----------------------------------------------------------------------------------------------------------|--|--|
| T23.722A | Corrosion of third degree of single left finger (nail) except thumb, initial encounter                   |  |  |
| T23.729A | Corrosion of third degree of unspecified single finger (nail) except thumb, initial encounter            |  |  |
| T23.731A | Corrosion of third degree of multiple right fingers (nail), not including thumb, initial encounter       |  |  |
| T23.732A | Corrosion of third degree of multiple left fingers (nail), not including thumb, initial encounter        |  |  |
| T23.739A | Corrosion of third degree of unspecified multiple fingers (nail), not including thumb, initial encounter |  |  |
| T23.741A | Corrosion of third degree of multiple right fingers (nail), including thumb, initial encounter           |  |  |
| T23.742A | Corrosion of third degree of multiple left fingers (nail), including thumb, initial encounter            |  |  |
| T23.749A | Corrosion of third degree of unspecified multiple fingers (nail), including thumb, initial encounter     |  |  |
| T23.751A | Corrosion of third degree of right palm, initial encounter                                               |  |  |
| T23.752A | Corrosion of third degree of left palm, initial encounter                                                |  |  |
| T23.759A | Corrosion of third degree of unspecified palm, initial encounter                                         |  |  |
| T23.761A | Corrosion of third degree of back of right hand, initial encounter                                       |  |  |
| T23.762A | Corrosion of third degree of back of left hand, initial encounter                                        |  |  |
| T23.769A | Corrosion of third degree back of unspecified hand, initial encounter                                    |  |  |
| T23.771A | Corrosion of third degree of right wrist, initial encounter                                              |  |  |
| T23.772A | Corrosion of third degree of left wrist, initial encounter                                               |  |  |
| T23.779A | Corrosion of third degree of unspecified wrist, initial encounter                                        |  |  |
| T23.791A | Corrosion of third degree of multiple sites of right wrist and hand, initial encounter                   |  |  |
| T23.792A | Corrosion of third degree of multiple sites of left wrist and hand, initial encounter                    |  |  |
| T23.799A | Corrosion of third degree of multiple sites of unspecified wrist and hand, initial encounter             |  |  |
| T24.201A | Burn of second degree of unspecified site of right lower limb, except ankle and foot, initial encounter  |  |  |

|          |                                                                                                               |  |  |
|----------|---------------------------------------------------------------------------------------------------------------|--|--|
| T24.202A | Burn of second degree of unspecified site of left lower limb, except ankle and foot, initial encounter        |  |  |
| T24.209A | Burn of second degree of unspecified site of unspecified lower limb, except ankle and foot, initial encounter |  |  |
| T24.211A | Burn of second degree of right thigh, initial encounter                                                       |  |  |
| T24.212A | Burn of second degree of left thigh, initial encounter                                                        |  |  |
| T24.219A | Burn of second degree of unspecified thigh, initial encounter                                                 |  |  |
| T24.221A | Burn of second degree of right knee, initial encounter                                                        |  |  |
| T24.222A | Burn of second degree of left knee, initial encounter                                                         |  |  |
| T24.229A | Burn of second degree of unspecified knee, initial encounter                                                  |  |  |
| T24.231A | Burn of second degree of right lower leg, initial encounter                                                   |  |  |
| T24.232A | Burn of second degree of left lower leg, initial encounter                                                    |  |  |
| T24.239A | Burn of second degree of unspecified lower leg, initial encounter                                             |  |  |
| T24.291A | Burn of second degree of multiple sites of right lower limb, except ankle and foot, initial encounter         |  |  |
| T24.292A | Burn of second degree of multiple sites of left lower limb, except ankle and foot, initial encounter          |  |  |
| T24.299A | Burn of second degree of multiple sites of unspecified lower limb, except ankle and foot, initial encounter   |  |  |
| T24.301A | Burn of third degree of unspecified site of right lower limb, except ankle and foot, initial encounter        |  |  |
| T24.302A | Burn of third degree of unspecified site of left lower limb, except ankle and foot, initial encounter         |  |  |
| T24.309A | Burn of third degree of unspecified site of unspecified lower limb, except ankle and foot, initial encounter  |  |  |
| T24.311A | Burn of third degree of right thigh, initial encounter                                                        |  |  |
| T24.312A | Burn of third degree of left thigh, initial encounter                                                         |  |  |
| T24.319A | Burn of third degree of unspecified thigh, initial encounter                                                  |  |  |
| T24.321A | Burn of third degree of right knee, initial encounter                                                         |  |  |
| T24.322A | Burn of third degree of left knee, initial encounter                                                          |  |  |
| T24.329A | Burn of third degree of unspecified knee, initial encounter                                                   |  |  |
| T24.331A | Burn of third degree of right lower leg, initial encounter                                                    |  |  |
| T24.332A | Burn of third degree of left lower leg, initial encounter                                                     |  |  |

|          |                                                                                                                    |  |  |
|----------|--------------------------------------------------------------------------------------------------------------------|--|--|
| T24.339A | Burn of third degree of unspecified lower leg, initial encounter                                                   |  |  |
| T24.391A | Burn of third degree of multiple sites of right lower limb, except ankle and foot, initial encounter               |  |  |
| T24.392A | Burn of third degree of multiple sites of left lower limb, except ankle and foot, initial encounter                |  |  |
| T24.399A | Burn of third degree of multiple sites of unspecified lower limb, except ankle and foot, initial encounter         |  |  |
| T24.601A | Corrosion of second degree of unspecified site of right lower limb, except ankle and foot, initial encounter       |  |  |
| T24.602A | Corrosion of second degree of unspecified site of left lower limb, except ankle and foot, initial encounter        |  |  |
| T24.609A | Corrosion of second degree of unspecified site of unspecified lower limb, except ankle and foot, initial encounter |  |  |
| T24.611A | Corrosion of second degree of right thigh, initial encounter                                                       |  |  |
| T24.612A | Corrosion of second degree of left thigh, initial encounter                                                        |  |  |
| T24.619A | Corrosion of second degree of unspecified thigh, initial encounter                                                 |  |  |
| T24.621A | Corrosion of second degree of right knee, initial encounter                                                        |  |  |
| T24.622A | Corrosion of second degree of left knee, initial encounter                                                         |  |  |
| T24.629A | Corrosion of second degree of unspecified knee, initial encounter                                                  |  |  |
| T24.631A | Corrosion of second degree of right lower leg, initial encounter                                                   |  |  |
| T24.632A | Corrosion of second degree of left lower leg, initial encounter                                                    |  |  |
| T24.639A | Corrosion of second degree of unspecified lower leg, initial encounter                                             |  |  |
| T24.691A | Corrosion of second degree of multiple sites of right lower limb, except ankle and foot, initial encounter         |  |  |
| T24.692A | Corrosion of second degree of multiple sites of left lower limb, except ankle and foot, initial encounter          |  |  |
| T24.699A | Corrosion of second degree of multiple sites of unspecified lower limb, except ankle and foot, initial encounter   |  |  |

|          |                                                                                                                   |  |  |
|----------|-------------------------------------------------------------------------------------------------------------------|--|--|
| T24.701A | Corrosion of third degree of unspecified site of right lower limb, except ankle and foot, initial encounter       |  |  |
| T24.702A | Corrosion of third degree of unspecified site of left lower limb, except ankle and foot, initial encounter        |  |  |
| T24.709A | Corrosion of third degree of unspecified site of unspecified lower limb, except ankle and foot, initial encounter |  |  |
| T24.711A | Corrosion of third degree of right thigh, initial encounter                                                       |  |  |
| T24.712A | Corrosion of third degree of left thigh, initial encounter                                                        |  |  |
| T24.719A | Corrosion of third degree of unspecified thigh, initial encounter                                                 |  |  |
| T24.721A | Corrosion of third degree of right knee, initial encounter                                                        |  |  |
| T24.722A | Corrosion of third degree of left knee, initial encounter                                                         |  |  |
| T24.729A | Corrosion of third degree of unspecified knee, initial encounter                                                  |  |  |
| T24.731A | Corrosion of third degree of right lower leg, initial encounter                                                   |  |  |
| T24.732A | Corrosion of third degree of left lower leg, initial encounter                                                    |  |  |
| T24.739A | Corrosion of third degree of unspecified lower leg, initial encounter                                             |  |  |
| T24.791A | Corrosion of third degree of multiple sites of right lower limb, except ankle and foot, initial encounter         |  |  |
| T24.792A | Corrosion of third degree of multiple sites of left lower limb, except ankle and foot, initial encounter          |  |  |
| T24.799A | Corrosion of third degree of multiple sites of unspecified lower limb, except ankle and foot, initial encounter   |  |  |
| T25.211A | Burn of second degree of right ankle, initial encounter                                                           |  |  |
| T25.212A | Burn of second degree of left ankle, initial encounter                                                            |  |  |
| T25.219A | Burn of second degree of unspecified ankle, initial encounter                                                     |  |  |
| T25.221A | Burn of second degree of right foot, initial encounter                                                            |  |  |
| T25.222A | Burn of second degree of left foot, initial encounter                                                             |  |  |
| T25.229A | Burn of second degree of unspecified foot, initial encounter                                                      |  |  |
| T25.231A | Burn of second degree of right toe(s) (nail), initial encounter                                                   |  |  |

|          |                                                                                          |  |  |
|----------|------------------------------------------------------------------------------------------|--|--|
| T25.232A | Burn of second degree of left toe(s) (nail), initial encounter                           |  |  |
| T25.239A | Burn of second degree of unspecified toe(s) (nail), initial encounter                    |  |  |
| T25.291A | Burn of second degree of multiple sites of right ankle and foot, initial encounter       |  |  |
| T25.292A | Burn of second degree of multiple sites of left ankle and foot, initial encounter        |  |  |
| T25.299A | Burn of second degree of multiple sites of unspecified ankle and foot, initial encounter |  |  |
| T25.311A | Burn of third degree of right ankle, initial encounter                                   |  |  |
| T25.312A | Burn of third degree of left ankle, initial encounter                                    |  |  |
| T25.319A | Burn of third degree of unspecified ankle, initial encounter                             |  |  |
| T25.321A | Burn of third degree of right foot, initial encounter                                    |  |  |
| T25.322A | Burn of third degree of left foot, initial encounter                                     |  |  |
| T25.329A | Burn of third degree of unspecified foot, initial encounter                              |  |  |
| T25.331A | Burn of third degree of right toe(s) (nail), initial encounter                           |  |  |
| T25.332A | Burn of third degree of left toe(s) (nail), initial encounter                            |  |  |
| T25.339A | Burn of third degree of unspecified toe(s) (nail), initial encounter                     |  |  |
| T25.391A | Burn of third degree of multiple sites of right ankle and foot, initial encounter        |  |  |
| T25.392A | Burn of third degree of multiple sites of left ankle and foot, initial encounter         |  |  |
| T25.399A | Burn of third degree of multiple sites of unspecified ankle and foot, initial encounter  |  |  |
| T25.611A | Corrosion of second degree of right ankle, initial encounter                             |  |  |
| T25.612A | Corrosion of second degree of left ankle, initial encounter                              |  |  |
| T25.619A | Corrosion of second degree of unspecified ankle, initial encounter                       |  |  |
| T25.621A | Corrosion of second degree of right foot, initial encounter                              |  |  |
| T25.622A | Corrosion of second degree of left foot, initial encounter                               |  |  |
| T25.629A | Corrosion of second degree of unspecified foot, initial encounter                        |  |  |
| T25.631A | Corrosion of second degree of right toe(s) (nail), initial encounter                     |  |  |

|          |                                                                                              |  |  |
|----------|----------------------------------------------------------------------------------------------|--|--|
| T25.632A | Corrosion of second degree of left toe(s) (nail), initial encounter                          |  |  |
| T25.639A | Corrosion of second degree of unspecified toe(s) (nail), initial encounter                   |  |  |
| T25.691A | Corrosion of second degree of right ankle and foot, initial encounter                        |  |  |
| T25.692A | Corrosion of second degree of left ankle and foot, initial encounter                         |  |  |
| T25.699A | Corrosion of second degree of unspecified ankle and foot, initial encounter                  |  |  |
| T25.711A | Corrosion of third degree of right ankle, initial encounter                                  |  |  |
| T25.712A | Corrosion of third degree of left ankle, initial encounter                                   |  |  |
| T25.719A | Corrosion of third degree of unspecified ankle, initial encounter                            |  |  |
| T25.721A | Corrosion of third degree of right foot, initial encounter                                   |  |  |
| T25.722A | Corrosion of third degree of left foot, initial encounter                                    |  |  |
| T25.729A | Corrosion of third degree of unspecified foot, initial encounter                             |  |  |
| T25.731A | Corrosion of third degree of right toe(s) (nail), initial encounter                          |  |  |
| T25.732A | Corrosion of third degree of left toe(s) (nail), initial encounter                           |  |  |
| T25.739A | Corrosion of third degree of unspecified toe(s) (nail), initial encounter                    |  |  |
| T25.791A | Corrosion of third degree of multiple sites of right ankle and foot, initial encounter       |  |  |
| T25.792A | Corrosion of third degree of multiple sites of left ankle and foot, initial encounter        |  |  |
| T25.799A | Corrosion of third degree of multiple sites of unspecified ankle and foot, initial encounter |  |  |
| T26.00XA | Burn of unspecified eyelid and periocular area, initial encounter                            |  |  |
| T26.01XA | Burn of right eyelid and periocular area, initial encounter                                  |  |  |
| T26.02XA | Burn of left eyelid and periocular area, initial encounter                                   |  |  |
| T26.10XA | Burn of cornea and conjunctival sac, unspecified eye, initial encounter                      |  |  |
| T26.11XA | Burn of cornea and conjunctival sac, right eye, initial encounter                            |  |  |



|          |                                                                                            |  |  |
|----------|--------------------------------------------------------------------------------------------|--|--|
| T26.12XA | Burn of cornea and conjunctival sac, left eye, initial encounter                           |  |  |
| T26.20XA | Burn with resulting rupture and destruction of unspecified eyeball, initial encounter      |  |  |
| T26.21XA | Burn with resulting rupture and destruction of right eyeball, initial encounter            |  |  |
| T26.22XA | Burn with resulting rupture and destruction of left eyeball, initial encounter             |  |  |
| T26.30XA | Burns of other specified parts of unspecified eye and adnexa, initial encounter            |  |  |
| T26.31XA | Burns of other specified parts of right eye and adnexa, initial encounter                  |  |  |
| T26.32XA | Burns of other specified parts of left eye and adnexa, initial encounter                   |  |  |
| T26.40XA | Burn of unspecified eye and adnexa, part unspecified, initial encounter                    |  |  |
| T26.41XA | Burn of right eye and adnexa, part unspecified, initial encounter                          |  |  |
| T26.42XA | Burn of left eye and adnexa, part unspecified, initial encounter                           |  |  |
| T26.50XA | Corrosion of unspecified eyelid and periocular area, initial encounter                     |  |  |
| T26.51XA | Corrosion of right eyelid and periocular area, initial encounter                           |  |  |
| T26.52XA | Corrosion of left eyelid and periocular area, initial encounter                            |  |  |
| T26.60XA | Corrosion of cornea and conjunctival sac, unspecified eye, initial encounter               |  |  |
| T26.61XA | Corrosion of cornea and conjunctival sac, right eye, initial encounter                     |  |  |
| T26.62XA | Corrosion of cornea and conjunctival sac, left eye, initial encounter                      |  |  |
| T26.70XA | Corrosion with resulting rupture and destruction of unspecified eyeball, initial encounter |  |  |
| T26.71XA | Corrosion with resulting rupture and destruction of right eyeball, initial encounter       |  |  |
| T26.72XA | Corrosion with resulting rupture and destruction of left eyeball, initial encounter        |  |  |

|          |                                                                                      |  |  |
|----------|--------------------------------------------------------------------------------------|--|--|
| T26.80XA | Corrosions of other specified parts of unspecified eye and adnexa, initial encounter |  |  |
| T26.81XA | Corrosions of other specified parts of right eye and adnexa, initial encounter       |  |  |
| T26.82XA | Corrosions of other specified parts of left eye and adnexa, initial encounter        |  |  |
| T26.90XA | Corrosion of unspecified eye and adnexa, part unspecified, initial encounter         |  |  |
| T26.91XA | Corrosion of right eye and adnexa, part unspecified, initial encounter               |  |  |
| T26.92XA | Corrosion of left eye and adnexa, part unspecified, initial encounter                |  |  |
| T27.0XXA | Burn of larynx and trachea, initial encounter                                        |  |  |
| T27.1XXA | Burn involving larynx and trachea with lung, initial encounter                       |  |  |
| T27.2XXA | Burn of other parts of respiratory tract, initial encounter                          |  |  |
| T27.3XXA | Burn of respiratory tract, part unspecified, initial encounter                       |  |  |
| T27.4XXA | Corrosion of larynx and trachea, initial encounter                                   |  |  |
| T27.5XXA | Corrosion involving larynx and trachea with lung, initial encounter                  |  |  |
| T27.6XXA | Corrosion of other parts of respiratory tract, initial encounter                     |  |  |
| T27.7XXA | Corrosion of respiratory tract, part unspecified, initial encounter                  |  |  |
| T28.0XXA | Burn of mouth and pharynx, initial encounter                                         |  |  |
| T28.1XXA | Burn of esophagus, initial encounter                                                 |  |  |
| T28.2XXA | Burn of other parts of alimentary tract, initial encounter                           |  |  |
| T28.3XXA | Burn of internal genitourinary organs, initial encounter                             |  |  |
| T28.40XA | Burn of unspecified internal organ, initial encounter                                |  |  |
| T28.411A | Burn of right ear drum, initial encounter                                            |  |  |
| T28.412A | Burn of left ear drum, initial encounter                                             |  |  |
| T28.419A | Burn of unspecified ear drum, initial encounter                                      |  |  |
| T28.49XA | Burn of other internal organ, initial encounter                                      |  |  |
| T28.5XXA | Corrosion of mouth and pharynx, initial encounter                                    |  |  |
| T28.6XXA | Corrosion of esophagus, initial encounter                                            |  |  |

|          |                                                                         |  |  |
|----------|-------------------------------------------------------------------------|--|--|
| T28.7XXA | Corrosion of other parts of alimentary tract, initial encounter         |  |  |
| T28.8XXA | Corrosion of internal genitourinary organs, initial encounter           |  |  |
| T28.90XA | Corrosions of unspecified internal organs, initial encounter            |  |  |
| T28.911A | Corrosions of right ear drum, initial encounter                         |  |  |
| T28.912A | Corrosions of left ear drum, initial encounter                          |  |  |
| T28.919A | Corrosions of unspecified ear drum, initial encounter                   |  |  |
| T28.99XA | Corrosions of other internal organs, initial encounter                  |  |  |
| T31.10   | Burns involving 10-19% of body surface with 0% to 9% third degree burns |  |  |
| T31.11   | Burns involving 10-19% of body surface with 10-19% third degree burns   |  |  |
| T31.20   | Burns involving 20-29% of body surface with 0% to 9% third degree burns |  |  |
| T31.21   | Burns involving 20-29% of body surface with 10-19% third degree burns   |  |  |
| T31.22   | Burns involving 20-29% of body surface with 20-29% third degree burns   |  |  |
| T31.30   | Burns involving 30-39% of body surface with 0% to 9% third degree burns |  |  |
| T31.31   | Burns involving 30-39% of body surface with 10-19% third degree burns   |  |  |
| T31.32   | Burns involving 30-39% of body surface with 20-29% third degree burns   |  |  |
| T31.33   | Burns involving 30-39% of body surface with 30-39% third degree burns   |  |  |
| T31.40   | Burns involving 40-49% of body surface with 0% to 9% third degree burns |  |  |
| T31.41   | Burns involving 40-49% of body surface with 10-19% third degree burns   |  |  |
| T31.42   | Burns involving 40-49% of body surface with 20-29% third degree burns   |  |  |
| T31.43   | Burns involving 40-49% of body surface with 30-39% third degree burns   |  |  |
| T31.44   | Burns involving 40-49% of body surface with 40-49% third degree burns   |  |  |

|        |                                                                         |  |  |
|--------|-------------------------------------------------------------------------|--|--|
| T31.50 | Burns involving 50-59% of body surface with 0% to 9% third degree burns |  |  |
| T31.51 | Burns involving 50-59% of body surface with 10-19% third degree burns   |  |  |
| T31.52 | Burns involving 50-59% of body surface with 20-29% third degree burns   |  |  |
| T31.53 | Burns involving 50-59% of body surface with 30-39% third degree burns   |  |  |
| T31.54 | Burns involving 50-59% of body surface with 40-49% third degree burns   |  |  |
| T31.55 | Burns involving 50-59% of body surface with 50-59% third degree burns   |  |  |
| T31.60 | Burns involving 60-69% of body surface with 0% to 9% third degree burns |  |  |
| T31.61 | Burns involving 60-69% of body surface with 10-19% third degree burns   |  |  |
| T31.62 | Burns involving 60-69% of body surface with 20-29% third degree burns   |  |  |
| T31.63 | Burns involving 60-69% of body surface with 30-39% third degree burns   |  |  |
| T31.64 | Burns involving 60-69% of body surface with 40-49% third degree burns   |  |  |
| T31.65 | Burns involving 60-69% of body surface with 50-59% third degree burns   |  |  |
| T31.66 | Burns involving 60-69% of body surface with 60-69% third degree burns   |  |  |
| T31.70 | Burns involving 70-79% of body surface with 0% to 9% third degree burns |  |  |
| T31.71 | Burns involving 70-79% of body surface with 10-19% third degree burns   |  |  |
| T31.72 | Burns involving 70-79% of body surface with 20-29% third degree burns   |  |  |
| T31.73 | Burns involving 70-79% of body surface with 30-39% third degree burns   |  |  |
| T31.74 | Burns involving 70-79% of body surface with 40-49% third degree burns   |  |  |
| T31.75 | Burns involving 70-79% of body surface with 50-59% third degree burns   |  |  |

|        |                                                                              |  |  |
|--------|------------------------------------------------------------------------------|--|--|
| T31.76 | Burns involving 70-79% of body surface with 60-69% third degree burns        |  |  |
| T31.77 | Burns involving 70-79% of body surface with 70-79% third degree burns        |  |  |
| T31.80 | Burns involving 80-89% of body surface with 0% to 9% third degree burns      |  |  |
| T31.81 | Burns involving 80-89% of body surface with 10-19% third degree burns        |  |  |
| T31.82 | Burns involving 80-89% of body surface with 20-29% third degree burns        |  |  |
| T31.83 | Burns involving 80-89% of body surface with 30-39% third degree burns        |  |  |
| T31.84 | Burns involving 80-89% of body surface with 40-49% third degree burns        |  |  |
| T31.85 | Burns involving 80-89% of body surface with 50-59% third degree burns        |  |  |
| T31.86 | Burns involving 80-89% of body surface with 60-69% third degree burns        |  |  |
| T31.87 | Burns involving 80-89% of body surface with 70-79% third degree burns        |  |  |
| T31.88 | Burns involving 80-89% of body surface with 80-89% third degree burns        |  |  |
| T31.90 | Burns involving 90% or more of body surface with 0% to 9% third degree burns |  |  |
| T31.91 | Burns involving 90% or more of body surface with 10-19% third degree burns   |  |  |
| T31.92 | Burns involving 90% or more of body surface with 20-29% third degree burns   |  |  |
| T31.93 | Burns involving 90% or more of body surface with 30-39% third degree burns   |  |  |
| T31.94 | Burns involving 90% or more of body surface with 40-49% third degree burns   |  |  |
| T31.95 | Burns involving 90% or more of body surface with 50-59% third degree burns   |  |  |
| T31.96 | Burns involving 90% or more of body surface with 60-69% third degree burns   |  |  |
| T31.97 | Burns involving 90% or more of body surface with 70-79% third degree burns   |  |  |

|        |                                                                                  |  |  |
|--------|----------------------------------------------------------------------------------|--|--|
| T31.98 | Burns involving 90% or more of body surface with 80-89% third degree burns       |  |  |
| T31.99 | Burns involving 90% or more of body surface with 90% or more third degree burns  |  |  |
| T32.10 | Corrosions involving 10-19% of body surface with 0% to 9% third degree corrosion |  |  |
| T32.11 | Corrosions involving 10-19% of body surface with 10-19% third degree corrosion   |  |  |
| T32.20 | Corrosions involving 20-29% of body surface with 0% to 9% third degree corrosion |  |  |
| T32.21 | Corrosions involving 20-29% of body surface with 10-19% third degree corrosion   |  |  |
| T32.22 | Corrosions involving 20-29% of body surface with 20-29% third degree corrosion   |  |  |
| T32.30 | Corrosions involving 30-39% of body surface with 0% to 9% third degree corrosion |  |  |
| T32.31 | Corrosions involving 30-39% of body surface with 10-19% third degree corrosion   |  |  |
| T32.32 | Corrosions involving 30-39% of body surface with 20-29% third degree corrosion   |  |  |
| T32.33 | Corrosions involving 30-39% of body surface with 30-39% third degree corrosion   |  |  |
| T32.40 | Corrosions involving 40-49% of body surface with 0% to 9% third degree corrosion |  |  |
| T32.41 | Corrosions involving 40-49% of body surface with 10-19% third degree corrosion   |  |  |
| T32.42 | Corrosions involving 40-49% of body surface with 20-29% third degree corrosion   |  |  |
| T32.43 | Corrosions involving 40-49% of body surface with 30-39% third degree corrosion   |  |  |
| T32.44 | Corrosions involving 40-49% of body surface with 40-49% third degree corrosion   |  |  |
| T32.50 | Corrosions involving 50-59% of body surface with 0% to 9% third degree corrosion |  |  |
| T32.51 | Corrosions involving 50-59% of body surface with 10-19% third degree corrosion   |  |  |
| T32.52 | Corrosions involving 50-59% of body surface with 20-29% third degree corrosion   |  |  |

|        |                                                                                  |  |  |
|--------|----------------------------------------------------------------------------------|--|--|
| T32.53 | Corrosions involving 50-59% of body surface with 30-39% third degree corrosion   |  |  |
| T32.54 | Corrosions involving 50-59% of body surface with 40-49% third degree corrosion   |  |  |
| T32.55 | Corrosions involving 50-59% of body surface with 50-59% third degree corrosion   |  |  |
| T32.60 | Corrosions involving 60-69% of body surface with 0% to 9% third degree corrosion |  |  |
| T32.61 | Corrosions involving 60-69% of body surface with 10-19% third degree corrosion   |  |  |
| T32.62 | Corrosions involving 60-69% of body surface with 20-29% third degree corrosion   |  |  |
| T32.63 | Corrosions involving 60-69% of body surface with 30-39% third degree corrosion   |  |  |
| T32.64 | Corrosions involving 60-69% of body surface with 40-49% third degree corrosion   |  |  |
| T32.65 | Corrosions involving 60-69% of body surface with 50-59% third degree corrosion   |  |  |
| T32.66 | Corrosions involving 60-69% of body surface with 60-69% third degree corrosion   |  |  |
| T32.70 | Corrosions involving 70-79% of body surface with 0% to 9% third degree corrosion |  |  |
| T32.71 | Corrosions involving 70-79% of body surface with 10-19% third degree corrosion   |  |  |
| T32.72 | Corrosions involving 70-79% of body surface with 20-29% third degree corrosion   |  |  |
| T32.73 | Corrosions involving 70-79% of body surface with 30-39% third degree corrosion   |  |  |
| T32.74 | Corrosions involving 70-79% of body surface with 40-49% third degree corrosion   |  |  |
| T32.75 | Corrosions involving 70-79% of body surface with 50-59% third degree corrosion   |  |  |
| T32.76 | Corrosions involving 70-79% of body surface with 60-69% third degree corrosion   |  |  |
| T32.77 | Corrosions involving 70-79% of body surface with 70-79% third degree corrosion   |  |  |
| T32.80 | Corrosions involving 80-89% of body surface with 0% to 9% third degree corrosion |  |  |

|        |                                                                                          |  |  |
|--------|------------------------------------------------------------------------------------------|--|--|
| T32.81 | Corrosions involving 80-89% of body surface with 10-19% third degree corrosion           |  |  |
| T32.82 | Corrosions involving 80-89% of body surface with 20-29% third degree corrosion           |  |  |
| T32.83 | Corrosions involving 80-89% of body surface with 30-39% third degree corrosion           |  |  |
| T32.84 | Corrosions involving 80-89% of body surface with 40-49% third degree corrosion           |  |  |
| T32.85 | Corrosions involving 80-89% of body surface with 50-59% third degree corrosion           |  |  |
| T32.86 | Corrosions involving 80-89% of body surface with 60-69% third degree corrosion           |  |  |
| T32.87 | Corrosions involving 80-89% of body surface with 70-79% third degree corrosion           |  |  |
| T32.88 | Corrosions involving 80-89% of body surface with 80-89% third degree corrosion           |  |  |
| T32.90 | Corrosions involving 90% or more of body surface with 0% to 9% third degree corrosion    |  |  |
| T32.91 | Corrosions involving 90% or more of body surface with 10-19% third degree corrosion      |  |  |
| T32.92 | Corrosions involving 90% or more of body surface with 20-29% third degree corrosion      |  |  |
| T32.93 | Corrosions involving 90% or more of body surface with 30-39% third degree corrosion      |  |  |
| T32.94 | Corrosions involving 90% or more of body surface with 40-49% third degree corrosion      |  |  |
| T32.95 | Corrosions involving 90% or more of body surface with 50-59% third degree corrosion      |  |  |
| T32.96 | Corrosions involving 90% or more of body surface with 60-69% third degree corrosion      |  |  |
| T32.97 | Corrosions involving 90% or more of body surface with 70-79% third degree corrosion      |  |  |
| T32.98 | Corrosions involving 90% or more of body surface with 80-89% third degree corrosion      |  |  |
| T32.99 | Corrosions involving 90% or more of body surface with 90% or more third degree corrosion |  |  |



### Included and Excluded ICD-10-CM Diagnosis Subcodes for Myocardial Infarction Condition Group

| Included ICD-10-CM diagnosis subcodes (n=9) |                                                                                               | Excluded ICD-10-CM diagnosis subcodes (n=0) |                     |
|---------------------------------------------|-----------------------------------------------------------------------------------------------|---------------------------------------------|---------------------|
| Subcode                                     | Subcode description                                                                           | Subcode                                     | Subcode description |
| I21.01                                      | ST elevation (STEMI) myocardial infarction involving left main coronary artery                |                                             |                     |
| I21.02                                      | ST elevation (STEMI) myocardial infarction involving left anterior descending coronary artery |                                             |                     |
| I21.09                                      | ST elevation (STEMI) myocardial infarction involving other coronary artery of anterior wall   |                                             |                     |
| I21.11                                      | ST elevation (STEMI) myocardial infarction involving right coronary artery                    |                                             |                     |
| I21.19                                      | ST elevation (STEMI) myocardial infarction involving other coronary artery of inferior wall   |                                             |                     |
| I21.21                                      | ST elevation (STEMI) myocardial infarction involving left circumflex coronary artery          |                                             |                     |
| I21.29                                      | ST elevation (STEMI) myocardial infarction involving other sites                              |                                             |                     |
| I21.3                                       | ST elevation (STEMI) myocardial infarction of unspecified site                                |                                             |                     |
| I21.4                                       | Non-ST elevation (NSTEMI) myocardial infarction                                               |                                             |                     |
|                                             |                                                                                               |                                             |                     |
|                                             |                                                                                               |                                             |                     |
|                                             |                                                                                               |                                             |                     |
|                                             |                                                                                               |                                             |                     |
|                                             |                                                                                               |                                             |                     |

### Included and Excluded ICD-10-CM Diagnosis Subcodes for Neck Injuries Condition Group

| Included ICD-10-CM diagnosis subcodes (n=303) |                                                                      | Excluded ICD-10-CM diagnosis subcodes (n=6) |                                                                      |
|-----------------------------------------------|----------------------------------------------------------------------|---------------------------------------------|----------------------------------------------------------------------|
| Subcode                                       | Subcode description                                                  | Subcode                                     | Subcode description                                                  |
| S11.011A                                      | Laceration without foreign body of larynx, initial encounter         | S14.2XXA                                    | Injury of nerve root of cervical spine, initial encounter            |
| S11.012A                                      | Laceration with foreign body of larynx, initial encounter            | S14.3XXA                                    | Injury of brachial plexus, initial encounter                         |
| S11.013A                                      | Puncture wound without foreign body of larynx, initial encounter     | S14.4XXA                                    | Injury of peripheral nerves of neck, initial encounter               |
| S11.014A                                      | Puncture wound with foreign body of larynx, initial encounter        | S14.5XXA                                    | Injury of cervical sympathetic nerves, initial encounter             |
| S11.015A                                      | Open bite of larynx, initial encounter                               | S14.8XXA                                    | Injury of other specified nerves of neck, initial encounter          |
| S11.019A                                      | Unspecified open wound of larynx, initial encounter                  | S16.1XXA                                    | Strain of muscle, fascia and tendon at neck level, initial encounter |
| S11.021A                                      | Laceration without foreign body of trachea, initial encounter        |                                             |                                                                      |
| S11.022A                                      | Laceration with foreign body of trachea, initial encounter           |                                             |                                                                      |
| S11.023A                                      | Puncture wound without foreign body of trachea, initial encounter    |                                             |                                                                      |
| S11.024A                                      | Puncture wound with foreign body of trachea, initial encounter       |                                             |                                                                      |
| S11.025A                                      | Open bite of trachea, initial encounter                              |                                             |                                                                      |
| S11.029A                                      | Unspecified open wound of trachea, initial encounter                 |                                             |                                                                      |
| S11.031A                                      | Laceration without foreign body of vocal cord, initial encounter     |                                             |                                                                      |
| S11.032A                                      | Laceration with foreign body of vocal cord, initial encounter        |                                             |                                                                      |
| S11.033A                                      | Puncture wound without foreign body of vocal cord, initial encounter |                                             |                                                                      |
| S11.034A                                      | Puncture wound with foreign body of vocal cord, initial encounter    |                                             |                                                                      |
| S11.035A                                      | Open bite of vocal cord, initial encounter                           |                                             |                                                                      |
| S11.039A                                      | Unspecified open wound of vocal cord, initial encounter              |                                             |                                                                      |
| S11.10XA                                      | Unspecified open wound of thyroid gland, initial encounter           |                                             |                                                                      |
| S11.11XA                                      | Laceration without foreign body of thyroid gland, initial encounter  |                                             |                                                                      |

|          |                                                                                          |  |  |
|----------|------------------------------------------------------------------------------------------|--|--|
| S11.12XA | Laceration with foreign body of thyroid gland, initial encounter                         |  |  |
| S11.13XA | Puncture wound without foreign body of thyroid gland, initial encounter                  |  |  |
| S11.14XA | Puncture wound with foreign body of thyroid gland, initial encounter                     |  |  |
| S11.15XA | Open bite of thyroid gland, initial encounter                                            |  |  |
| S11.20XA | Unspecified open wound of pharynx and cervical esophagus, initial encounter              |  |  |
| S11.21XA | Laceration without foreign body of pharynx and cervical esophagus, initial encounter     |  |  |
| S11.22XA | Laceration with foreign body of pharynx and cervical esophagus, initial encounter        |  |  |
| S11.23XA | Puncture wound without foreign body of pharynx and cervical esophagus, initial encounter |  |  |
| S11.24XA | Puncture wound with foreign body of pharynx and cervical esophagus, initial encounter    |  |  |
| S11.25XA | Open bite of pharynx and cervical esophagus, initial encounter                           |  |  |
| S11.80XA | Unspecified open wound of other specified part of neck, initial encounter                |  |  |
| S11.81XA | Laceration without foreign body of other specified part of neck, initial encounter       |  |  |
| S11.82XA | Laceration with foreign body of other specified part of neck, initial encounter          |  |  |
| S11.83XA | Puncture wound without foreign body of other specified part of neck, initial encounter   |  |  |
| S11.84XA | Puncture wound with foreign body of other specified part of neck, initial encounter      |  |  |
| S11.85XA | Open bite of other specified part of neck, initial encounter                             |  |  |
| S11.89XA | Other open wound of other specified part of neck, initial encounter                      |  |  |
| S11.90XA | Unspecified open wound of unspecified part of neck, initial encounter                    |  |  |
| S11.91XA | Laceration without foreign body of unspecified part of neck, initial encounter           |  |  |
| S11.92XA | Laceration with foreign body of unspecified part of neck, initial encounter              |  |  |

|          |                                                                                                        |  |  |
|----------|--------------------------------------------------------------------------------------------------------|--|--|
| S11.93XA | Puncture wound without foreign body of unspecified part of neck, initial encounter                     |  |  |
| S11.94XA | Puncture wound with foreign body of unspecified part of neck, initial encounter                        |  |  |
| S11.95XA | Open bite of unspecified part of neck, initial encounter                                               |  |  |
| S12.000A | Unspecified displaced fracture of first cervical vertebra, initial encounter for closed fracture       |  |  |
| S12.000B | Unspecified displaced fracture of first cervical vertebra, initial encounter for open fracture         |  |  |
| S12.001A | Unspecified nondisplaced fracture of first cervical vertebra, initial encounter for closed fracture    |  |  |
| S12.001B | Unspecified nondisplaced fracture of first cervical vertebra, initial encounter for open fracture      |  |  |
| S12.01XA | Stable burst fracture of first cervical vertebra, initial encounter for closed fracture                |  |  |
| S12.01XB | Stable burst fracture of first cervical vertebra, initial encounter for open fracture                  |  |  |
| S12.02XA | Unstable burst fracture of first cervical vertebra, initial encounter for closed fracture              |  |  |
| S12.02XB | Unstable burst fracture of first cervical vertebra, initial encounter for open fracture                |  |  |
| S12.030A | Displaced posterior arch fracture of first cervical vertebra, initial encounter for closed fracture    |  |  |
| S12.030B | Displaced posterior arch fracture of first cervical vertebra, initial encounter for open fracture      |  |  |
| S12.031A | Nondisplaced posterior arch fracture of first cervical vertebra, initial encounter for closed fracture |  |  |
| S12.031B | Nondisplaced posterior arch fracture of first cervical vertebra, initial encounter for open fracture   |  |  |
| S12.040A | Displaced lateral mass fracture of first cervical vertebra, initial encounter for closed fracture      |  |  |
| S12.040B | Displaced lateral mass fracture of first cervical vertebra, initial encounter for open fracture        |  |  |
| S12.041A | Nondisplaced lateral mass fracture of first cervical vertebra, initial encounter for closed fracture   |  |  |
| S12.041B | Nondisplaced lateral mass fracture of first cervical vertebra, initial encounter for open fracture     |  |  |
| S12.090A | Other displaced fracture of first cervical vertebra, initial encounter for closed fracture             |  |  |

|          |                                                                                                                      |  |  |
|----------|----------------------------------------------------------------------------------------------------------------------|--|--|
| S12.090B | Other displaced fracture of first cervical vertebra, initial encounter for open fracture                             |  |  |
| S12.091A | Other nondisplaced fracture of first cervical vertebra, initial encounter for closed fracture                        |  |  |
| S12.091B | Other nondisplaced fracture of first cervical vertebra, initial encounter for open fracture                          |  |  |
| S12.100A | Unspecified displaced fracture of second cervical vertebra, initial encounter for closed fracture                    |  |  |
| S12.100B | Unspecified displaced fracture of second cervical vertebra, initial encounter for open fracture                      |  |  |
| S12.101A | Unspecified nondisplaced fracture of second cervical vertebra, initial encounter for closed fracture                 |  |  |
| S12.101B | Unspecified nondisplaced fracture of second cervical vertebra, initial encounter for open fracture                   |  |  |
| S12.110A | Anterior displaced Type II dens fracture, initial encounter for closed fracture                                      |  |  |
| S12.110B | Anterior displaced Type II dens fracture, initial encounter for open fracture                                        |  |  |
| S12.111A | Posterior displaced Type II dens fracture, initial encounter for closed fracture                                     |  |  |
| S12.111B | Posterior displaced Type II dens fracture, initial encounter for open fracture                                       |  |  |
| S12.112A | Nondisplaced Type II dens fracture, initial encounter for closed fracture                                            |  |  |
| S12.112B | Nondisplaced Type II dens fracture, initial encounter for open fracture                                              |  |  |
| S12.120A | Other displaced dens fracture, initial encounter for closed fracture                                                 |  |  |
| S12.120B | Other displaced dens fracture, initial encounter for open fracture                                                   |  |  |
| S12.121A | Other nondisplaced dens fracture, initial encounter for closed fracture                                              |  |  |
| S12.121B | Other nondisplaced dens fracture, initial encounter for open fracture                                                |  |  |
| S12.130A | Unspecified traumatic displaced spondylolisthesis of second cervical vertebra, initial encounter for closed fracture |  |  |

|          |                                                                                                                         |  |  |
|----------|-------------------------------------------------------------------------------------------------------------------------|--|--|
| S12.130B | Unspecified traumatic displaced spondylolisthesis of second cervical vertebra, initial encounter for open fracture      |  |  |
| S12.131A | Unspecified traumatic nondisplaced spondylolisthesis of second cervical vertebra, initial encounter for closed fracture |  |  |
| S12.131B | Unspecified traumatic nondisplaced spondylolisthesis of second cervical vertebra, initial encounter for open fracture   |  |  |
| S12.14XA | Type III traumatic spondylolisthesis of second cervical vertebra, initial encounter for closed fracture                 |  |  |
| S12.14XB | Type III traumatic spondylolisthesis of second cervical vertebra, initial encounter for open fracture                   |  |  |
| S12.150A | Other traumatic displaced spondylolisthesis of second cervical vertebra, initial encounter for closed fracture          |  |  |
| S12.150B | Other traumatic displaced spondylolisthesis of second cervical vertebra, initial encounter for open fracture            |  |  |
| S12.151A | Other traumatic nondisplaced spondylolisthesis of second cervical vertebra, initial encounter for closed fracture       |  |  |
| S12.151B | Other traumatic nondisplaced spondylolisthesis of second cervical vertebra, initial encounter for open fracture         |  |  |
| S12.190A | Other displaced fracture of second cervical vertebra, initial encounter for closed fracture                             |  |  |
| S12.190B | Other displaced fracture of second cervical vertebra, initial encounter for open fracture                               |  |  |
| S12.191A | Other nondisplaced fracture of second cervical vertebra, initial encounter for closed fracture                          |  |  |
| S12.191B | Other nondisplaced fracture of second cervical vertebra, initial encounter for open fracture                            |  |  |
| S12.200A | Unspecified displaced fracture of third cervical vertebra, initial encounter for closed fracture                        |  |  |
| S12.200B | Unspecified displaced fracture of third cervical vertebra, initial encounter for open fracture                          |  |  |
| S12.201A | Unspecified nondisplaced fracture of third cervical vertebra, initial encounter for closed fracture                     |  |  |
| S12.201B | Unspecified nondisplaced fracture of third cervical vertebra, initial encounter for open fracture                       |  |  |

|          |                                                                                                                        |  |  |
|----------|------------------------------------------------------------------------------------------------------------------------|--|--|
| S12.230A | Unspecified traumatic displaced spondylolisthesis of third cervical vertebra, initial encounter for closed fracture    |  |  |
| S12.230B | Unspecified traumatic displaced spondylolisthesis of third cervical vertebra, initial encounter for open fracture      |  |  |
| S12.231A | Unspecified traumatic nondisplaced spondylolisthesis of third cervical vertebra, initial encounter for closed fracture |  |  |
| S12.231B | Unspecified traumatic nondisplaced spondylolisthesis of third cervical vertebra, initial encounter for open fracture   |  |  |
| S12.24XA | Type III traumatic spondylolisthesis of third cervical vertebra, initial encounter for closed fracture                 |  |  |
| S12.24XB | Type III traumatic spondylolisthesis of third cervical vertebra, initial encounter for open fracture                   |  |  |
| S12.250A | Other traumatic displaced spondylolisthesis of third cervical vertebra, initial encounter for closed fracture          |  |  |
| S12.250B | Other traumatic displaced spondylolisthesis of third cervical vertebra, initial encounter for open fracture            |  |  |
| S12.251A | Other traumatic nondisplaced spondylolisthesis of third cervical vertebra, initial encounter for closed fracture       |  |  |
| S12.251B | Other traumatic nondisplaced spondylolisthesis of third cervical vertebra, initial encounter for open fracture         |  |  |
| S12.290A | Other displaced fracture of third cervical vertebra, initial encounter for closed fracture                             |  |  |
| S12.290B | Other displaced fracture of third cervical vertebra, initial encounter for open fracture                               |  |  |
| S12.291A | Other nondisplaced fracture of third cervical vertebra, initial encounter for closed fracture                          |  |  |
| S12.291B | Other nondisplaced fracture of third cervical vertebra, initial encounter for open fracture                            |  |  |
| S12.300A | Unspecified displaced fracture of fourth cervical vertebra, initial encounter for closed fracture                      |  |  |
| S12.300B | Unspecified displaced fracture of fourth cervical vertebra, initial encounter for open fracture                        |  |  |
| S12.301A | Unspecified nondisplaced fracture of fourth cervical vertebra, initial encounter for closed fracture                   |  |  |
| S12.301B | Unspecified nondisplaced fracture of fourth cervical vertebra, initial encounter for open fracture                     |  |  |

|          |                                                                                                                         |  |  |
|----------|-------------------------------------------------------------------------------------------------------------------------|--|--|
| S12.330A | Unspecified traumatic displaced spondylolisthesis of fourth cervical vertebra, initial encounter for closed fracture    |  |  |
| S12.330B | Unspecified traumatic displaced spondylolisthesis of fourth cervical vertebra, initial encounter for open fracture      |  |  |
| S12.331A | Unspecified traumatic nondisplaced spondylolisthesis of fourth cervical vertebra, initial encounter for closed fracture |  |  |
| S12.331B | Unspecified traumatic nondisplaced spondylolisthesis of fourth cervical vertebra, initial encounter for open fracture   |  |  |
| S12.34XA | Type III traumatic spondylolisthesis of fourth cervical vertebra, initial encounter for closed fracture                 |  |  |
| S12.34XB | Type III traumatic spondylolisthesis of fourth cervical vertebra, initial encounter for open fracture                   |  |  |
| S12.350A | Other traumatic displaced spondylolisthesis of fourth cervical vertebra, initial encounter for closed fracture          |  |  |
| S12.350B | Other traumatic displaced spondylolisthesis of fourth cervical vertebra, initial encounter for open fracture            |  |  |
| S12.351A | Other traumatic nondisplaced spondylolisthesis of fourth cervical vertebra, initial encounter for closed fracture       |  |  |
| S12.351B | Other traumatic nondisplaced spondylolisthesis of fourth cervical vertebra, initial encounter for open fracture         |  |  |
| S12.390A | Other displaced fracture of fourth cervical vertebra, initial encounter for closed fracture                             |  |  |
| S12.390B | Other displaced fracture of fourth cervical vertebra, initial encounter for open fracture                               |  |  |
| S12.391A | Other nondisplaced fracture of fourth cervical vertebra, initial encounter for closed fracture                          |  |  |
| S12.391B | Other nondisplaced fracture of fourth cervical vertebra, initial encounter for open fracture                            |  |  |
| S12.400A | Unspecified displaced fracture of fifth cervical vertebra, initial encounter for closed fracture                        |  |  |
| S12.400B | Unspecified displaced fracture of fifth cervical vertebra, initial encounter for open fracture                          |  |  |
| S12.401A | Unspecified nondisplaced fracture of fifth cervical vertebra, initial encounter for closed fracture                     |  |  |
| S12.401B | Unspecified nondisplaced fracture of fifth cervical vertebra, initial encounter for open fracture                       |  |  |



|          |                                                                                                                        |  |  |
|----------|------------------------------------------------------------------------------------------------------------------------|--|--|
| S12.430A | Unspecified traumatic displaced spondylolisthesis of fifth cervical vertebra, initial encounter for closed fracture    |  |  |
| S12.430B | Unspecified traumatic displaced spondylolisthesis of fifth cervical vertebra, initial encounter for open fracture      |  |  |
| S12.431A | Unspecified traumatic nondisplaced spondylolisthesis of fifth cervical vertebra, initial encounter for closed fracture |  |  |
| S12.431B | Unspecified traumatic nondisplaced spondylolisthesis of fifth cervical vertebra, initial encounter for open fracture   |  |  |
| S12.44XA | Type III traumatic spondylolisthesis of fifth cervical vertebra, initial encounter for closed fracture                 |  |  |
| S12.44XB | Type III traumatic spondylolisthesis of fifth cervical vertebra, initial encounter for open fracture                   |  |  |
| S12.450A | Other traumatic displaced spondylolisthesis of fifth cervical vertebra, initial encounter for closed fracture          |  |  |
| S12.450B | Other traumatic displaced spondylolisthesis of fifth cervical vertebra, initial encounter for open fracture            |  |  |
| S12.451A | Other traumatic nondisplaced spondylolisthesis of fifth cervical vertebra, initial encounter for closed fracture       |  |  |
| S12.451B | Other traumatic nondisplaced spondylolisthesis of fifth cervical vertebra, initial encounter for open fracture         |  |  |
| S12.490A | Other displaced fracture of fifth cervical vertebra, initial encounter for closed fracture                             |  |  |
| S12.490B | Other displaced fracture of fifth cervical vertebra, initial encounter for open fracture                               |  |  |
| S12.491A | Other nondisplaced fracture of fifth cervical vertebra, initial encounter for closed fracture                          |  |  |
| S12.491B | Other nondisplaced fracture of fifth cervical vertebra, initial encounter for open fracture                            |  |  |
| S12.500A | Unspecified displaced fracture of sixth cervical vertebra, initial encounter for closed fracture                       |  |  |
| S12.500B | Unspecified displaced fracture of sixth cervical vertebra, initial encounter for open fracture                         |  |  |
| S12.501A | Unspecified nondisplaced fracture of sixth cervical vertebra, initial encounter for closed fracture                    |  |  |
| S12.501B | Unspecified nondisplaced fracture of sixth cervical vertebra, initial encounter for open fracture                      |  |  |
| S12.530A | Unspecified traumatic displaced spondylolisthesis of sixth cervical vertebra, initial encounter for closed fracture    |  |  |

|          |                                                                                                                        |  |  |
|----------|------------------------------------------------------------------------------------------------------------------------|--|--|
| S12.530B | Unspecified traumatic displaced spondylolisthesis of sixth cervical vertebra, initial encounter for open fracture      |  |  |
| S12.531A | Unspecified traumatic nondisplaced spondylolisthesis of sixth cervical vertebra, initial encounter for closed fracture |  |  |
| S12.531B | Unspecified traumatic nondisplaced spondylolisthesis of sixth cervical vertebra, initial encounter for open fracture   |  |  |
| S12.54XA | Type III traumatic spondylolisthesis of sixth cervical vertebra, initial encounter for closed fracture                 |  |  |
| S12.54XB | Type III traumatic spondylolisthesis of sixth cervical vertebra, initial encounter for open fracture                   |  |  |
| S12.550A | Other traumatic displaced spondylolisthesis of sixth cervical vertebra, initial encounter for closed fracture          |  |  |
| S12.550B | Other traumatic displaced spondylolisthesis of sixth cervical vertebra, initial encounter for open fracture            |  |  |
| S12.551A | Other traumatic nondisplaced spondylolisthesis of sixth cervical vertebra, initial encounter for closed fracture       |  |  |
| S12.551B | Other traumatic nondisplaced spondylolisthesis of sixth cervical vertebra, initial encounter for open fracture         |  |  |
| S12.590A | Other displaced fracture of sixth cervical vertebra, initial encounter for closed fracture                             |  |  |
| S12.590B | Other displaced fracture of sixth cervical vertebra, initial encounter for open fracture                               |  |  |
| S12.591A | Other nondisplaced fracture of sixth cervical vertebra, initial encounter for closed fracture                          |  |  |
| S12.591B | Other nondisplaced fracture of sixth cervical vertebra, initial encounter for open fracture                            |  |  |
| S12.600A | Unspecified displaced fracture of seventh cervical vertebra, initial encounter for closed fracture                     |  |  |
| S12.600B | Unspecified displaced fracture of seventh cervical vertebra, initial encounter for open fracture                       |  |  |
| S12.601A | Unspecified nondisplaced fracture of seventh cervical vertebra, initial encounter for closed fracture                  |  |  |
| S12.601B | Unspecified nondisplaced fracture of seventh cervical vertebra, initial encounter for open fracture                    |  |  |
| S12.630A | Unspecified traumatic displaced spondylolisthesis of seventh cervical vertebra, initial encounter for closed fracture  |  |  |

|          |                                                                                                                          |  |  |
|----------|--------------------------------------------------------------------------------------------------------------------------|--|--|
| S12.630B | Unspecified traumatic displaced spondylolisthesis of seventh cervical vertebra, initial encounter for open fracture      |  |  |
| S12.631A | Unspecified traumatic nondisplaced spondylolisthesis of seventh cervical vertebra, initial encounter for closed fracture |  |  |
| S12.631B | Unspecified traumatic nondisplaced spondylolisthesis of seventh cervical vertebra, initial encounter for open fracture   |  |  |
| S12.64XA | Type III traumatic spondylolisthesis of seventh cervical vertebra, initial encounter for closed fracture                 |  |  |
| S12.64XB | Type III traumatic spondylolisthesis of seventh cervical vertebra, initial encounter for open fracture                   |  |  |
| S12.650A | Other traumatic displaced spondylolisthesis of seventh cervical vertebra, initial encounter for closed fracture          |  |  |
| S12.650B | Other traumatic displaced spondylolisthesis of seventh cervical vertebra, initial encounter for open fracture            |  |  |
| S12.651A | Other traumatic nondisplaced spondylolisthesis of seventh cervical vertebra, initial encounter for closed fracture       |  |  |
| S12.651B | Other traumatic nondisplaced spondylolisthesis of seventh cervical vertebra, initial encounter for open fracture         |  |  |
| S12.690A | Other displaced fracture of seventh cervical vertebra, initial encounter for closed fracture                             |  |  |
| S12.690B | Other displaced fracture of seventh cervical vertebra, initial encounter for open fracture                               |  |  |
| S12.691A | Other nondisplaced fracture of seventh cervical vertebra, initial encounter for closed fracture                          |  |  |
| S12.691B | Other nondisplaced fracture of seventh cervical vertebra, initial encounter for open fracture                            |  |  |
| S12.8XXA | Fracture of other parts of neck, initial encounter                                                                       |  |  |
| S12.9XXA | Fracture of neck, unspecified, initial encounter                                                                         |  |  |
| S14.0XXA | Concussion and edema of cervical spinal cord, initial encounter                                                          |  |  |
| S14.101A | Unspecified injury at C1 level of cervical spinal cord, initial encounter                                                |  |  |
| S14.102A | Unspecified injury at C2 level of cervical spinal cord, initial encounter                                                |  |  |

|          |                                                                                    |  |  |
|----------|------------------------------------------------------------------------------------|--|--|
| S14.103A | Unspecified injury at C3 level of cervical spinal cord, initial encounter          |  |  |
| S14.104A | Unspecified injury at C4 level of cervical spinal cord, initial encounter          |  |  |
| S14.105A | Unspecified injury at C5 level of cervical spinal cord, initial encounter          |  |  |
| S14.106A | Unspecified injury at C6 level of cervical spinal cord, initial encounter          |  |  |
| S14.107A | Unspecified injury at C7 level of cervical spinal cord, initial encounter          |  |  |
| S14.108A | Unspecified injury at C8 level of cervical spinal cord, initial encounter          |  |  |
| S14.109A | Unspecified injury at unspecified level of cervical spinal cord, initial encounter |  |  |
| S14.111A | Complete lesion at C1 level of cervical spinal cord, initial encounter             |  |  |
| S14.112A | Complete lesion at C2 level of cervical spinal cord, initial encounter             |  |  |
| S14.113A | Complete lesion at C3 level of cervical spinal cord, initial encounter             |  |  |
| S14.114A | Complete lesion at C4 level of cervical spinal cord, initial encounter             |  |  |
| S14.115A | Complete lesion at C5 level of cervical spinal cord, initial encounter             |  |  |
| S14.116A | Complete lesion at C6 level of cervical spinal cord, initial encounter             |  |  |
| S14.117A | Complete lesion at C7 level of cervical spinal cord, initial encounter             |  |  |
| S14.118A | Complete lesion at C8 level of cervical spinal cord, initial encounter             |  |  |
| S14.119A | Complete lesion at unspecified level of cervical spinal cord, initial encounter    |  |  |
| S14.121A | Central cord syndrome at C1 level of cervical spinal cord, initial encounter       |  |  |
| S14.122A | Central cord syndrome at C2 level of cervical spinal cord, initial encounter       |  |  |
| S14.123A | Central cord syndrome at C3 level of cervical spinal cord, initial encounter       |  |  |

|          |                                                                                        |  |  |
|----------|----------------------------------------------------------------------------------------|--|--|
| S14.124A | Central cord syndrome at C4 level of cervical spinal cord, initial encounter           |  |  |
| S14.125A | Central cord syndrome at C5 level of cervical spinal cord, initial encounter           |  |  |
| S14.126A | Central cord syndrome at C6 level of cervical spinal cord, initial encounter           |  |  |
| S14.127A | Central cord syndrome at C7 level of cervical spinal cord, initial encounter           |  |  |
| S14.128A | Central cord syndrome at C8 level of cervical spinal cord, initial encounter           |  |  |
| S14.129A | Central cord syndrome at unspecified level of cervical spinal cord, initial encounter  |  |  |
| S14.131A | Anterior cord syndrome at C1 level of cervical spinal cord, initial encounter          |  |  |
| S14.132A | Anterior cord syndrome at C2 level of cervical spinal cord, initial encounter          |  |  |
| S14.133A | Anterior cord syndrome at C3 level of cervical spinal cord, initial encounter          |  |  |
| S14.134A | Anterior cord syndrome at C4 level of cervical spinal cord, initial encounter          |  |  |
| S14.135A | Anterior cord syndrome at C5 level of cervical spinal cord, initial encounter          |  |  |
| S14.136A | Anterior cord syndrome at C6 level of cervical spinal cord, initial encounter          |  |  |
| S14.137A | Anterior cord syndrome at C7 level of cervical spinal cord, initial encounter          |  |  |
| S14.138A | Anterior cord syndrome at C8 level of cervical spinal cord, initial encounter          |  |  |
| S14.139A | Anterior cord syndrome at unspecified level of cervical spinal cord, initial encounter |  |  |
| S14.141A | Brown-Sequard syndrome at C1 level of cervical spinal cord, initial encounter          |  |  |
| S14.142A | Brown-Sequard syndrome at C2 level of cervical spinal cord, initial encounter          |  |  |
| S14.143A | Brown-Sequard syndrome at C3 level of cervical spinal cord, initial encounter          |  |  |
| S14.144A | Brown-Sequard syndrome at C4 level of cervical spinal cord, initial encounter          |  |  |

|          |                                                                                         |  |  |
|----------|-----------------------------------------------------------------------------------------|--|--|
| S14.145A | Brown-Sequard syndrome at C5 level of cervical spinal cord, initial encounter           |  |  |
| S14.146A | Brown-Sequard syndrome at C6 level of cervical spinal cord, initial encounter           |  |  |
| S14.147A | Brown-Sequard syndrome at C7 level of cervical spinal cord, initial encounter           |  |  |
| S14.148A | Brown-Sequard syndrome at C8 level of cervical spinal cord, initial encounter           |  |  |
| S14.149A | Brown-Sequard syndrome at unspecified level of cervical spinal cord, initial encounter  |  |  |
| S14.151A | Other incomplete lesion at C1 level of cervical spinal cord, initial encounter          |  |  |
| S14.152A | Other incomplete lesion at C2 level of cervical spinal cord, initial encounter          |  |  |
| S14.153A | Other incomplete lesion at C3 level of cervical spinal cord, initial encounter          |  |  |
| S14.154A | Other incomplete lesion at C4 level of cervical spinal cord, initial encounter          |  |  |
| S14.155A | Other incomplete lesion at C5 level of cervical spinal cord, initial encounter          |  |  |
| S14.156A | Other incomplete lesion at C6 level of cervical spinal cord, initial encounter          |  |  |
| S14.157A | Other incomplete lesion at C7 level of cervical spinal cord, initial encounter          |  |  |
| S14.158A | Other incomplete lesion at C8 level of cervical spinal cord, initial encounter          |  |  |
| S14.159A | Other incomplete lesion at unspecified level of cervical spinal cord, initial encounter |  |  |
| S14.9XXA | Injury of unspecified nerves of neck, initial encounter                                 |  |  |
| S15.001A | Unspecified injury of right carotid artery, initial encounter                           |  |  |
| S15.002A | Unspecified injury of left carotid artery, initial encounter                            |  |  |
| S15.009A | Unspecified injury of unspecified carotid artery, initial encounter                     |  |  |
| S15.011A | Minor laceration of right carotid artery, initial encounter                             |  |  |
| S15.012A | Minor laceration of left carotid artery, initial encounter                              |  |  |
| S15.019A | Minor laceration of unspecified carotid artery, initial encounter                       |  |  |
| S15.021A | Major laceration of right carotid artery, initial encounter                             |  |  |

|          |                                                                            |  |  |
|----------|----------------------------------------------------------------------------|--|--|
| S15.022A | Major laceration of left carotid artery, initial encounter                 |  |  |
| S15.029A | Major laceration of unspecified carotid artery, initial encounter          |  |  |
| S15.091A | Other specified injury of right carotid artery, initial encounter          |  |  |
| S15.092A | Other specified injury of left carotid artery, initial encounter           |  |  |
| S15.099A | Other specified injury of unspecified carotid artery, initial encounter    |  |  |
| S15.101A | Unspecified injury of right vertebral artery, initial encounter            |  |  |
| S15.102A | Unspecified injury of left vertebral artery, initial encounter             |  |  |
| S15.109A | Unspecified injury of unspecified vertebral artery, initial encounter      |  |  |
| S15.111A | Minor laceration of right vertebral artery, initial encounter              |  |  |
| S15.112A | Minor laceration of left vertebral artery, initial encounter               |  |  |
| S15.119A | Minor laceration of unspecified vertebral artery, initial encounter        |  |  |
| S15.121A | Major laceration of right vertebral artery, initial encounter              |  |  |
| S15.122A | Major laceration of left vertebral artery, initial encounter               |  |  |
| S15.129A | Major laceration of unspecified vertebral artery, initial encounter        |  |  |
| S15.191A | Other specified injury of right vertebral artery, initial encounter        |  |  |
| S15.192A | Other specified injury of left vertebral artery, initial encounter         |  |  |
| S15.199A | Other specified injury of unspecified vertebral artery, initial encounter  |  |  |
| S15.201A | Unspecified injury of right external jugular vein, initial encounter       |  |  |
| S15.202A | Unspecified injury of left external jugular vein, initial encounter        |  |  |
| S15.209A | Unspecified injury of unspecified external jugular vein, initial encounter |  |  |
| S15.211A | Minor laceration of right external jugular vein, initial encounter         |  |  |
| S15.212A | Minor laceration of left external jugular vein, initial encounter          |  |  |

|          |                                                                                |  |  |
|----------|--------------------------------------------------------------------------------|--|--|
| S15.219A | Minor laceration of unspecified external jugular vein, initial encounter       |  |  |
| S15.221A | Major laceration of right external jugular vein, initial encounter             |  |  |
| S15.222A | Major laceration of left external jugular vein, initial encounter              |  |  |
| S15.229A | Major laceration of unspecified external jugular vein, initial encounter       |  |  |
| S15.291A | Other specified injury of right external jugular vein, initial encounter       |  |  |
| S15.292A | Other specified injury of left external jugular vein, initial encounter        |  |  |
| S15.299A | Other specified injury of unspecified external jugular vein, initial encounter |  |  |
| S15.301A | Unspecified injury of right internal jugular vein, initial encounter           |  |  |
| S15.302A | Unspecified injury of left internal jugular vein, initial encounter            |  |  |
| S15.309A | Unspecified injury of unspecified internal jugular vein, initial encounter     |  |  |
| S15.311A | Minor laceration of right internal jugular vein, initial encounter             |  |  |
| S15.312A | Minor laceration of left internal jugular vein, initial encounter              |  |  |
| S15.319A | Minor laceration of unspecified internal jugular vein, initial encounter       |  |  |
| S15.321A | Major laceration of right internal jugular vein, initial encounter             |  |  |
| S15.322A | Major laceration of left internal jugular vein, initial encounter              |  |  |
| S15.329A | Major laceration of unspecified internal jugular vein, initial encounter       |  |  |
| S15.391A | Other specified injury of right internal jugular vein, initial encounter       |  |  |
| S15.392A | Other specified injury of left internal jugular vein, initial encounter        |  |  |
| S15.399A | Other specified injury of unspecified internal jugular vein, initial encounter |  |  |



|          |                                                                                      |  |  |
|----------|--------------------------------------------------------------------------------------|--|--|
| S15.8XXA | Injury of other specified blood vessels at neck level, initial encounter             |  |  |
| S15.9XXA | Injury of unspecified blood vessel at neck level, initial encounter                  |  |  |
| S16.2XXA | Laceration of muscle, fascia and tendon at neck level, initial encounter             |  |  |
| S16.8XXA | Other specified injury of muscle, fascia and tendon at neck level, initial encounter |  |  |
| S16.9XXA | Unspecified injury of muscle, fascia and tendon at neck level, initial encounter     |  |  |
| S17.0XXA | Crushing injury of larynx and trachea, initial encounter                             |  |  |
| S17.8XXA | Crushing injury of other specified parts of neck, initial encounter                  |  |  |
| S17.9XXA | Crushing injury of neck, part unspecified, initial encounter                         |  |  |
| S19.80XA | Other specified injuries of unspecified part of neck, initial encounter              |  |  |
| S19.81XA | Other specified injuries of larynx, initial encounter                                |  |  |
| S19.82XA | Other specified injuries of cervical trachea, initial encounter                      |  |  |
| S19.83XA | Other specified injuries of vocal cord, initial encounter                            |  |  |
| S19.84XA | Other specified injuries of thyroid gland, initial encounter                         |  |  |
| S19.85XA | Other specified injuries of pharynx and cervical esophagus, initial encounter        |  |  |
| S19.89XA | Other specified injuries of other specified part of neck, initial encounter          |  |  |
| S19.9XXA | Unspecified injury of neck, initial encounter                                        |  |  |

### Included and Excluded ICD-10-CM Diagnosis Subcodes for Other Cardiac Arrhythmia Condition Group

| Included ICD-10-CM diagnosis subcodes (n=7) |                                       | Excluded ICD-10-CM diagnosis subcodes (n=11) |                                       |
|---------------------------------------------|---------------------------------------|----------------------------------------------|---------------------------------------|
| Subcode                                     | Subcode description                   | Subcode                                      | Subcode description                   |
| I44.1                                       | Atrioventricular block, second degree | I44.0                                        | Atrioventricular block, first degree  |
| I44.2                                       | Atrioventricular block, complete      | I44.4                                        | Left anterior fascicular block        |
| I44.30                                      | Unspecified atrioventricular block    | I44.5                                        | Left posterior fascicular block       |
| I44.39                                      | Other atrioventricular block          | I44.60                                       | Unspecified fascicular block          |
| I49.5                                       | Sick sinus syndrome                   | I44.69                                       | Other fascicular block                |
| I49.8                                       | Other specified cardiac arrhythmias   | I44.7                                        | Left bundle-branch block, unspecified |
| I49.9                                       | Cardiac arrhythmia, unspecified       | I49.1                                        | Atrial premature depolarization       |
|                                             |                                       | I49.2                                        | Junctional premature depolarization   |
|                                             |                                       | I49.3                                        | Ventricular premature depolarization  |
|                                             |                                       | I49.40                                       | Unspecified premature depolarization  |
|                                             |                                       | I49.49                                       | Other premature depolarization        |

### Included and Excluded ICD-10-CM Diagnosis Subcodes for Other Diseases of Intestine Condition Group

| Included ICD-10-CM diagnosis subcodes (n=3) |                                         | Excluded ICD-10-CM diagnosis subcodes (n=6) |                                       |
|---------------------------------------------|-----------------------------------------|---------------------------------------------|---------------------------------------|
| Subcode                                     | Subcode description                     | Subcode                                     | Subcode description                   |
| K63.0                                       | Abscess of intestine                    | K63.3                                       | Ulcer of intestine                    |
| K63.1                                       | Perforation of intestine (nontraumatic) | K63.4                                       | Enteroptosis                          |
| K63.2                                       | Fistula of intestine                    | K63.5                                       | Polyp of colon                        |
|                                             |                                         | K63.81                                      | Dieulafoy lesion of intestine         |
|                                             |                                         | K63.89                                      | Other specified diseases of intestine |
|                                             |                                         | K63.9                                       | Disease of intestine, unspecified     |

### Included and Excluded ICD-10-CM Diagnosis Subcodes for Other Tachyarrhythmias Condition Group

| Included ICD-10-CM diagnosis subcodes (n=8) |                                     | Excluded ICD-10-CM diagnosis subcodes (n=2) |                                |
|---------------------------------------------|-------------------------------------|---------------------------------------------|--------------------------------|
| Subcode                                     | Subcode description                 | Subcode                                     | Subcode description            |
| I47.0                                       | Re-entry ventricular arrhythmia     | I48.1                                       | Persistent atrial fibrillation |
| I47.1                                       | Supraventricular tachycardia        | I48.2                                       | Chronic atrial fibrillation    |
| I47.9                                       | Paroxysmal tachycardia, unspecified |                                             |                                |
| I48.0                                       | Paroxysmal atrial fibrillation      |                                             |                                |
| I48.3                                       | Typical atrial flutter              |                                             |                                |
| I48.4                                       | Atypical atrial flutter             |                                             |                                |
| I48.91                                      | Unspecified atrial fibrillation     |                                             |                                |
| I48.92                                      | Unspecified atrial flutter          |                                             |                                |

## Included and Excluded ICD-10-CM Diagnosis Subcodes for Overdose/Poisonings Condition Group

| Included ICD-10-CM diagnosis subcodes (n=572) |                                                                                       | Excluded ICD-10-CM diagnosis subcodes (n=68) |                                                                                                         |
|-----------------------------------------------|---------------------------------------------------------------------------------------|----------------------------------------------|---------------------------------------------------------------------------------------------------------|
| Subcode                                       | Subcode description                                                                   | Subcode                                      | Subcode description                                                                                     |
| T39.011A                                      | Poisoning by aspirin, accidental (unintentional), initial encounter                   | T39.016A                                     | Underdosing of aspirin, initial encounter                                                               |
| T39.012A                                      | Poisoning by aspirin, intentional self-harm, initial encounter                        | T39.096A                                     | Underdosing of salicylates, initial encounter                                                           |
| T39.013A                                      | Poisoning by aspirin, assault, initial encounter                                      | T39.1X6A                                     | Underdosing of 4-Aminophenol derivatives, initial encounter                                             |
| T39.014A                                      | Poisoning by aspirin, undetermined, initial encounter                                 | T39.2X6A                                     | Underdosing of pyrazolone derivatives, initial encounter                                                |
| T39.015A                                      | Adverse effect of aspirin, initial encounter                                          | T39.316A                                     | Underdosing of propionic acid derivatives, initial encounter                                            |
| T39.091A                                      | Poisoning by salicylates, accidental (unintentional), initial encounter               | T39.396A                                     | Underdosing of other nonsteroidal anti-inflammatory drugs [NSAID], initial encounter                    |
| T39.092A                                      | Poisoning by salicylates, intentional self-harm, initial encounter                    | T39.4X6A                                     | Underdosing of antirheumatics, not elsewhere classified, initial encounter                              |
| T39.093A                                      | Poisoning by salicylates, assault, initial encounter                                  | T39.8X6A                                     | Underdosing of other nonopioid analgesics and antipyretics, not elsewhere classified, initial encounter |
| T39.094A                                      | Poisoning by salicylates, undetermined, initial encounter                             | T39.96XA                                     | Underdosing of unspecified nonopioid analgesic, antipyretic and antirheumatic, initial encounter        |
| T39.095A                                      | Adverse effect of salicylates, initial encounter                                      | T40.0X6A                                     | Underdosing of opium, initial encounter                                                                 |
| T39.1X1A                                      | Poisoning by 4-Aminophenol derivatives, accidental (unintentional), initial encounter | T40.2X6A                                     | Underdosing of other opioids, initial encounter                                                         |
| T39.1X2A                                      | Poisoning by 4-Aminophenol derivatives, intentional self-harm, initial encounter      | T40.3X6A                                     | Underdosing of methadone, initial encounter                                                             |
| T39.1X3A                                      | Poisoning by 4-Aminophenol derivatives, assault, initial encounter                    | T40.4X6A                                     | Underdosing of other synthetic narcotics, initial encounter                                             |
| T39.1X4A                                      | Poisoning by 4-Aminophenol derivatives, undetermined, initial encounter               | T40.5X6A                                     | Underdosing of cocaine, initial encounter                                                               |
| T39.1X5A                                      | Adverse effect of 4-Aminophenol derivatives, initial encounter                        | T40.606A                                     | Underdosing of unspecified narcotics, initial encounter                                                 |
| T39.2X1A                                      | Poisoning by pyrazolone derivatives, accidental (unintentional), initial encounter    | T40.696A                                     | Underdosing of other narcotics, initial encounter                                                       |
| T39.2X2A                                      | Poisoning by pyrazolone derivatives, intentional self-harm, initial encounter         | T40.7X6A                                     | Underdosing of cannabis (derivatives), initial encounter                                                |
| T39.2X3A                                      | Poisoning by pyrazolone derivatives, assault, initial encounter                       | T40.906A                                     | Underdosing of unspecified psychodysleptics, initial encounter                                          |

|          |                                                                                                                                   |          |                                                                                                    |
|----------|-----------------------------------------------------------------------------------------------------------------------------------|----------|----------------------------------------------------------------------------------------------------|
| T39.2X4A | Poisoning by pyrazolone derivatives, undetermined, initial encounter                                                              | T40.996A | Underdosing of other psychodysleptics, initial encounter                                           |
| T39.2X5A | Adverse effect of pyrazolone derivatives, initial encounter                                                                       | T42.0X6A | Underdosing of hydantoin derivatives, initial encounter                                            |
| T39.311A | Poisoning by propionic acid derivatives, accidental (unintentional), initial encounter                                            | T42.1X6A | Underdosing of iminostilbenes, initial encounter                                                   |
| T39.312A | Poisoning by propionic acid derivatives, intentional self-harm, initial encounter                                                 | T42.2X6A | Underdosing of succinimides and oxazolinediones, initial encounter                                 |
| T39.313A | Poisoning by propionic acid derivatives, assault, initial encounter                                                               | T42.3X6A | Underdosing of barbiturates, initial encounter                                                     |
| T39.314A | Poisoning by propionic acid derivatives, undetermined, initial encounter                                                          | T42.4X6A | Underdosing of benzodiazepines, initial encounter                                                  |
| T39.315A | Adverse effect of propionic acid derivatives, initial encounter                                                                   | T42.5X6A | Underdosing of mixed antiepileptics, initial encounter                                             |
| T39.391A | Poisoning by other nonsteroidal anti-inflammatory drugs [NSAID], accidental (unintentional), initial encounter                    | T42.6X6A | Underdosing of other antiepileptic and sedative-hypnotic drugs, initial encounter                  |
| T39.392A | Poisoning by other nonsteroidal anti-inflammatory drugs [NSAID], intentional self-harm, initial encounter                         | T42.76XA | Underdosing of unspecified antiepileptic and sedative-hypnotic drugs, initial encounter            |
| T39.393A | Poisoning by other nonsteroidal anti-inflammatory drugs [NSAID], assault, initial encounter                                       | T42.8X6A | Underdosing of antiparkinsonism drugs and other central muscle-tone depressants, initial encounter |
| T39.394A | Poisoning by other nonsteroidal anti-inflammatory drugs [NSAID], undetermined, initial encounter                                  | T43.016A | Underdosing of tricyclic antidepressants, initial encounter                                        |
| T39.395A | Adverse effect of other nonsteroidal anti-inflammatory drugs [NSAID], initial encounter                                           | T43.026A | Underdosing of tetracyclic antidepressants, initial encounter                                      |
| T39.4X1A | Poisoning by antirheumatics, not elsewhere classified, accidental (unintentional), initial encounter                              | T43.1X6A | Underdosing of monoamine-oxidase-inhibitor antidepressants, initial encounter                      |
| T39.4X2A | Poisoning by antirheumatics, not elsewhere classified, intentional self-harm, initial encounter                                   | T43.206A | Underdosing of unspecified antidepressants, initial encounter                                      |
| T39.4X3A | Poisoning by antirheumatics, not elsewhere classified, assault, initial encounter                                                 | T43.216A | Underdosing of selective serotonin and norepinephrine reuptake inhibitors, initial encounter       |
| T39.4X4A | Poisoning by antirheumatics, not elsewhere classified, undetermined, initial encounter                                            | T43.226A | Underdosing of selective serotonin reuptake inhibitors, initial encounter                          |
| T39.4X5A | Adverse effect of antirheumatics, not elsewhere classified, initial encounter                                                     | T43.296A | Underdosing of other antidepressants, initial encounter                                            |
| T39.8X1A | Poisoning by other nonopioid analgesics and antipyretics, not elsewhere classified, accidental (unintentional), initial encounter | T43.3X6A | Underdosing of phenothiazine antipsychotics and neuroleptics, initial encounter                    |
| T39.8X2A | Poisoning by other nonopioid analgesics and antipyretics, not elsewhere classified, intentional self-harm, initial encounter      | T43.4X6A | Underdosing of butyrophenone and thiothixene neuroleptics, initial encounter                       |

|          |                                                                                                                            |          |                                                                                                                    |
|----------|----------------------------------------------------------------------------------------------------------------------------|----------|--------------------------------------------------------------------------------------------------------------------|
| T39.8X3A | Poisoning by other nonopioid analgesics and antipyretics, not elsewhere classified, assault, initial encounter             | T43.506A | Underdosing of unspecified antipsychotics and neuroleptics, initial encounter                                      |
| T39.8X4A | Poisoning by other nonopioid analgesics and antipyretics, not elsewhere classified, undetermined, initial encounter        | T43.596A | Underdosing of other antipsychotics and neuroleptics, initial encounter                                            |
| T39.8X5A | Adverse effect of other nonopioid analgesics and antipyretics, not elsewhere classified, initial encounter                 | T43.606A | Underdosing of unspecified psychostimulants, initial encounter                                                     |
| T39.91XA | Poisoning by unspecified nonopioid analgesic, antipyretic and antirheumatic, accidental (unintentional), initial encounter | T43.616A | Underdosing of caffeine, initial encounter                                                                         |
| T39.92XA | Poisoning by unspecified nonopioid analgesic, antipyretic and antirheumatic, intentional self-harm, initial encounter      | T43.626A | Underdosing of amphetamines, initial encounter                                                                     |
| T39.93XA | Poisoning by unspecified nonopioid analgesic, antipyretic and antirheumatic, assault, initial encounter                    | T43.636A | Underdosing of methylphenidate, initial encounter                                                                  |
| T39.94XA | Poisoning by unspecified nonopioid analgesic, antipyretic and antirheumatic, undetermined, initial encounter               | T43.696A | Underdosing of other psychostimulants, initial encounter                                                           |
| T39.95XA | Adverse effect of unspecified nonopioid analgesic, antipyretic and antirheumatic, initial encounter                        | T43.8X6A | Underdosing of other psychotropic drugs, initial encounter                                                         |
| T40.0X1A | Poisoning by opium, accidental (unintentional), initial encounter                                                          | T43.96XA | Underdosing of unspecified psychotropic drug, initial encounter                                                    |
| T40.0X2A | Poisoning by opium, intentional self-harm, initial encounter                                                               | T44.0X6A | Underdosing of anticholinesterase agents, initial encounter                                                        |
| T40.0X3A | Poisoning by opium, assault, initial encounter                                                                             | T44.1X6A | Underdosing of other parasympathomimetics, initial encounter                                                       |
| T40.0X4A | Poisoning by opium, undetermined, initial encounter                                                                        | T44.2X6A | Underdosing of ganglionic blocking drugs, initial encounter                                                        |
| T40.0X5A | Adverse effect of opium, initial encounter                                                                                 | T44.3X6A | Underdosing of other parasympatholytics [anticholinergics and antimuscarinics] and spasmolytics, initial encounter |
| T40.1X1A | Poisoning by heroin, accidental (unintentional), initial encounter                                                         | T44.4X6A | Underdosing of predominantly alpha-adrenoreceptor agonists, initial encounter                                      |
| T40.1X2A | Poisoning by heroin, intentional self-harm, initial encounter                                                              | T44.5X6A | Underdosing of predominantly beta-adrenoreceptor agonists, initial encounter                                       |
| T40.1X3A | Poisoning by heroin, assault, initial encounter                                                                            | T44.6X6A | Underdosing of alpha-adrenoreceptor antagonists, initial encounter                                                 |
| T40.1X4A | Poisoning by heroin, undetermined, initial encounter                                                                       | T44.7X6A | Underdosing of beta-adrenoreceptor antagonists, initial encounter                                                  |
| T40.2X1A | Poisoning by other opioids, accidental (unintentional), initial encounter                                                  | T44.8X6A | Underdosing of centrally-acting and adrenergic-neuron-blocking agents, initial encounter                           |

|          |                                                                                       |          |                                                                                                      |
|----------|---------------------------------------------------------------------------------------|----------|------------------------------------------------------------------------------------------------------|
| T40.2X2A | Poisoning by other opioids, intentional self-harm, initial encounter                  | T44.906A | Underdosing of unspecified drugs primarily affecting the autonomic nervous system, initial encounter |
| T40.2X3A | Poisoning by other opioids, assault, initial encounter                                | T44.996A | Underdosing of other drug primarily affecting the autonomic nervous system, initial encounter        |
| T40.2X4A | Poisoning by other opioids, undetermined, initial encounter                           | T46.0X6A | Underdosing of cardiac-stimulant glycosides and drugs of similar action, initial encounter           |
| T40.2X5A | Adverse effect of other opioids, initial encounter                                    | T46.1X6A | Underdosing of calcium-channel blockers, initial encounter                                           |
| T40.3X1A | Poisoning by methadone, accidental (unintentional), initial encounter                 | T46.2X6A | Underdosing of other antidysrhythmic drugs, initial encounter                                        |
| T40.3X2A | Poisoning by methadone, intentional self-harm, initial encounter                      | T46.3X6A | Underdosing of coronary vasodilators, initial encounter                                              |
| T40.3X3A | Poisoning by methadone, assault, initial encounter                                    | T46.4X6A | Underdosing of angiotensin-converting-enzyme inhibitors, initial encounter                           |
| T40.3X4A | Poisoning by methadone, undetermined, initial encounter                               | T46.5X6A | Underdosing of other antihypertensive drugs, initial encounter                                       |
| T40.3X5A | Adverse effect of methadone, initial encounter                                        | T46.6X6A | Underdosing of antihyperlipidemic and antiarteriosclerotic drugs, initial encounter                  |
| T40.4X1A | Poisoning by other synthetic narcotics, accidental (unintentional), initial encounter | T46.7X6A | Underdosing of peripheral vasodilators, initial encounter                                            |
| T40.4X2A | Poisoning by other synthetic narcotics, intentional self-harm, initial encounter      | T46.8X6A | Underdosing of antivaricose drugs, including sclerosing agents, initial encounter                    |
| T40.4X3A | Poisoning by other synthetic narcotics, assault, initial encounter                    | T46.906A | Underdosing of unspecified agents primarily affecting the cardiovascular system, initial encounter   |
| T40.4X4A | Poisoning by other synthetic narcotics, undetermined, initial encounter               | T46.996A | Underdosing of other agents primarily affecting the cardiovascular system, initial encounter         |
| T40.4X5A | Adverse effect of other synthetic narcotics, initial encounter                        |          |                                                                                                      |
| T40.5X1A | Poisoning by cocaine, accidental (unintentional), initial encounter                   |          |                                                                                                      |
| T40.5X2A | Poisoning by cocaine, intentional self-harm, initial encounter                        |          |                                                                                                      |
| T40.5X3A | Poisoning by cocaine, assault, initial encounter                                      |          |                                                                                                      |
| T40.5X4A | Poisoning by cocaine, undetermined, initial encounter                                 |          |                                                                                                      |
| T40.5X5A | Adverse effect of cocaine, initial encounter                                          |          |                                                                                                      |
| T40.601A | Poisoning by unspecified narcotics, accidental (unintentional), initial encounter     |          |                                                                                                      |
| T40.602A | Poisoning by unspecified narcotics, intentional self-harm, initial encounter          |          |                                                                                                      |

|          |                                                                                                          |  |  |
|----------|----------------------------------------------------------------------------------------------------------|--|--|
| T40.603A | Poisoning by unspecified narcotics, assault, initial encounter                                           |  |  |
| T40.604A | Poisoning by unspecified narcotics, undetermined, initial encounter                                      |  |  |
| T40.605A | Adverse effect of unspecified narcotics, initial encounter                                               |  |  |
| T40.691A | Poisoning by other narcotics, accidental (unintentional), initial encounter                              |  |  |
| T40.692A | Poisoning by other narcotics, intentional self-harm, initial encounter                                   |  |  |
| T40.693A | Poisoning by other narcotics, assault, initial encounter                                                 |  |  |
| T40.694A | Poisoning by other narcotics, undetermined, initial encounter                                            |  |  |
| T40.695A | Adverse effect of other narcotics, initial encounter                                                     |  |  |
| T40.7X1A | Poisoning by cannabis (derivatives), accidental (unintentional), initial encounter                       |  |  |
| T40.7X2A | Poisoning by cannabis (derivatives), intentional self-harm, initial encounter                            |  |  |
| T40.7X3A | Poisoning by cannabis (derivatives), assault, initial encounter                                          |  |  |
| T40.7X4A | Poisoning by cannabis (derivatives), undetermined, initial encounter                                     |  |  |
| T40.7X5A | Adverse effect of cannabis (derivatives), initial encounter                                              |  |  |
| T40.8X1A | Poisoning by lysergide [LSD], accidental (unintentional), initial encounter                              |  |  |
| T40.8X2A | Poisoning by lysergide [LSD], intentional self-harm, initial encounter                                   |  |  |
| T40.8X3A | Poisoning by lysergide [LSD], assault, initial encounter                                                 |  |  |
| T40.8X4A | Poisoning by lysergide [LSD], undetermined, initial encounter                                            |  |  |
| T40.901A | Poisoning by unspecified psychodysleptics [hallucinogens], accidental (unintentional), initial encounter |  |  |
| T40.902A | Poisoning by unspecified psychodysleptics [hallucinogens], intentional self-harm, initial encounter      |  |  |
| T40.903A | Poisoning by unspecified psychodysleptics [hallucinogens], assault, initial encounter                    |  |  |
| T40.904A | Poisoning by unspecified psychodysleptics [hallucinogens], undetermined, initial encounter               |  |  |



|          |                                                                                                    |  |  |
|----------|----------------------------------------------------------------------------------------------------|--|--|
| T40.905A | Adverse effect of unspecified psychodysleptics [hallucinogens], initial encounter                  |  |  |
| T40.991A | Poisoning by other psychodysleptics [hallucinogens], accidental (unintentional), initial encounter |  |  |
| T40.992A | Poisoning by other psychodysleptics [hallucinogens], intentional self-harm, initial encounter      |  |  |
| T40.993A | Poisoning by other psychodysleptics [hallucinogens], assault, initial encounter                    |  |  |
| T40.994A | Poisoning by other psychodysleptics [hallucinogens], undetermined, initial encounter               |  |  |
| T40.995A | Adverse effect of other psychodysleptics [hallucinogens], initial encounter                        |  |  |
| T42.0X1A | Poisoning by hydantoin derivatives, accidental (unintentional), initial encounter                  |  |  |
| T42.0X2A | Poisoning by hydantoin derivatives, intentional self-harm, initial encounter                       |  |  |
| T42.0X3A | Poisoning by hydantoin derivatives, assault, initial encounter                                     |  |  |
| T42.0X4A | Poisoning by hydantoin derivatives, undetermined, initial encounter                                |  |  |
| T42.0X5A | Adverse effect of hydantoin derivatives, initial encounter                                         |  |  |
| T42.1X1A | Poisoning by iminostilbenes, accidental (unintentional), initial encounter                         |  |  |
| T42.1X2A | Poisoning by iminostilbenes, intentional self-harm, initial encounter                              |  |  |
| T42.1X3A | Poisoning by iminostilbenes, assault, initial encounter                                            |  |  |
| T42.1X4A | Poisoning by iminostilbenes, undetermined, initial encounter                                       |  |  |
| T42.1X5A | Adverse effect of iminostilbenes, initial encounter                                                |  |  |
| T42.2X1A | Poisoning by succinimides and oxazolidinediones, accidental (unintentional), initial encounter     |  |  |
| T42.2X2A | Poisoning by succinimides and oxazolidinediones, intentional self-harm, initial encounter          |  |  |
| T42.2X3A | Poisoning by succinimides and oxazolidinediones, assault, initial encounter                        |  |  |
| T42.2X4A | Poisoning by succinimides and oxazolidinediones, undetermined, initial encounter                   |  |  |
| T42.2X5A | Adverse effect of succinimides and oxazolidinediones, initial encounter                            |  |  |

|          |                                                                                                                   |  |  |
|----------|-------------------------------------------------------------------------------------------------------------------|--|--|
| T42.3X1A | Poisoning by barbiturates, accidental (unintentional), initial encounter                                          |  |  |
| T42.3X2A | Poisoning by barbiturates, intentional self-harm, initial encounter                                               |  |  |
| T42.3X3A | Poisoning by barbiturates, assault, initial encounter                                                             |  |  |
| T42.3X4A | Poisoning by barbiturates, undetermined, initial encounter                                                        |  |  |
| T42.3X5A | Adverse effect of barbiturates, initial encounter                                                                 |  |  |
| T42.4X1A | Poisoning by benzodiazepines, accidental (unintentional), initial encounter                                       |  |  |
| T42.4X2A | Poisoning by benzodiazepines, intentional self-harm, initial encounter                                            |  |  |
| T42.4X3A | Poisoning by benzodiazepines, assault, initial encounter                                                          |  |  |
| T42.4X4A | Poisoning by benzodiazepines, undetermined, initial encounter                                                     |  |  |
| T42.4X5A | Adverse effect of benzodiazepines, initial encounter                                                              |  |  |
| T42.5X1A | Poisoning by mixed antiepileptics, accidental (unintentional), initial encounter                                  |  |  |
| T42.5X2A | Poisoning by mixed antiepileptics, intentional self-harm, initial encounter                                       |  |  |
| T42.5X3A | Poisoning by mixed antiepileptics, assault, initial encounter                                                     |  |  |
| T42.5X4A | Poisoning by mixed antiepileptics, undetermined, initial encounter                                                |  |  |
| T42.5X5A | Adverse effect of mixed antiepileptics, initial encounter                                                         |  |  |
| T42.6X1A | Poisoning by other antiepileptic and sedative-hypnotic drugs, accidental (unintentional), initial encounter       |  |  |
| T42.6X2A | Poisoning by other antiepileptic and sedative-hypnotic drugs, intentional self-harm, initial encounter            |  |  |
| T42.6X3A | Poisoning by other antiepileptic and sedative-hypnotic drugs, assault, initial encounter                          |  |  |
| T42.6X4A | Poisoning by other antiepileptic and sedative-hypnotic drugs, undetermined, initial encounter                     |  |  |
| T42.6X5A | Adverse effect of other antiepileptic and sedative-hypnotic drugs, initial encounter                              |  |  |
| T42.71XA | Poisoning by unspecified antiepileptic and sedative-hypnotic drugs, accidental (unintentional), initial encounter |  |  |

|          |                                                                                                                              |  |  |
|----------|------------------------------------------------------------------------------------------------------------------------------|--|--|
| T42.72XA | Poisoning by unspecified antiepileptic and sedative-hypnotic drugs, intentional self-harm, initial encounter                 |  |  |
| T42.73XA | Poisoning by unspecified antiepileptic and sedative-hypnotic drugs, assault, initial encounter                               |  |  |
| T42.74XA | Poisoning by unspecified antiepileptic and sedative-hypnotic drugs, undetermined, initial encounter                          |  |  |
| T42.75XA | Adverse effect of unspecified antiepileptic and sedative-hypnotic drugs, initial encounter                                   |  |  |
| T42.8X1A | Poisoning by antiparkinsonism drugs and other central muscle-tone depressants, accidental (unintentional), initial encounter |  |  |
| T42.8X2A | Poisoning by antiparkinsonism drugs and other central muscle-tone depressants, intentional self-harm, initial encounter      |  |  |
| T42.8X3A | Poisoning by antiparkinsonism drugs and other central muscle-tone depressants, assault, initial encounter                    |  |  |
| T42.8X4A | Poisoning by antiparkinsonism drugs and other central muscle-tone depressants, undetermined, initial encounter               |  |  |
| T42.8X5A | Adverse effect of antiparkinsonism drugs and other central muscle-tone depressants, initial encounter                        |  |  |
| T43.011A | Poisoning by tricyclic antidepressants, accidental (unintentional), initial encounter                                        |  |  |
| T43.012A | Poisoning by tricyclic antidepressants, intentional self-harm, initial encounter                                             |  |  |
| T43.013A | Poisoning by tricyclic antidepressants, assault, initial encounter                                                           |  |  |
| T43.014A | Poisoning by tricyclic antidepressants, undetermined, initial encounter                                                      |  |  |
| T43.015A | Adverse effect of tricyclic antidepressants, initial encounter                                                               |  |  |
| T43.021A | Poisoning by tetracyclic antidepressants, accidental (unintentional), initial encounter                                      |  |  |
| T43.022A | Poisoning by tetracyclic antidepressants, intentional self-harm, initial encounter                                           |  |  |
| T43.023A | Poisoning by tetracyclic antidepressants, assault, initial encounter                                                         |  |  |
| T43.024A | Poisoning by tetracyclic antidepressants, undetermined, initial encounter                                                    |  |  |

|          |                                                                                                                        |  |  |
|----------|------------------------------------------------------------------------------------------------------------------------|--|--|
| T43.025A | Adverse effect of tetracyclic antidepressants, initial encounter                                                       |  |  |
| T43.1X1A | Poisoning by monoamine-oxidase-inhibitor antidepressants, accidental (unintentional), initial encounter                |  |  |
| T43.1X2A | Poisoning by monoamine-oxidase-inhibitor antidepressants, intentional self-harm, initial encounter                     |  |  |
| T43.1X3A | Poisoning by monoamine-oxidase-inhibitor antidepressants, assault, initial encounter                                   |  |  |
| T43.1X4A | Poisoning by monoamine-oxidase-inhibitor antidepressants, undetermined, initial encounter                              |  |  |
| T43.1X5A | Adverse effect of monoamine-oxidase-inhibitor antidepressants, initial encounter                                       |  |  |
| T43.201A | Poisoning by unspecified antidepressants, accidental (unintentional), initial encounter                                |  |  |
| T43.202A | Poisoning by unspecified antidepressants, intentional self-harm, initial encounter                                     |  |  |
| T43.203A | Poisoning by unspecified antidepressants, assault, initial encounter                                                   |  |  |
| T43.204A | Poisoning by unspecified antidepressants, undetermined, initial encounter                                              |  |  |
| T43.205A | Adverse effect of unspecified antidepressants, initial encounter                                                       |  |  |
| T43.211A | Poisoning by selective serotonin and norepinephrine reuptake inhibitors, accidental (unintentional), initial encounter |  |  |
| T43.212A | Poisoning by selective serotonin and norepinephrine reuptake inhibitors, intentional self-harm, initial encounter      |  |  |
| T43.213A | Poisoning by selective serotonin and norepinephrine reuptake inhibitors, assault, initial encounter                    |  |  |
| T43.214A | Poisoning by selective serotonin and norepinephrine reuptake inhibitors, undetermined, initial encounter               |  |  |
| T43.215A | Adverse effect of selective serotonin and norepinephrine reuptake inhibitors, initial encounter                        |  |  |
| T43.221A | Poisoning by selective serotonin reuptake inhibitors, accidental (unintentional), initial encounter                    |  |  |
| T43.222A | Poisoning by selective serotonin reuptake inhibitors, intentional self-harm, initial encounter                         |  |  |

|          |                                                                                                           |  |  |
|----------|-----------------------------------------------------------------------------------------------------------|--|--|
| T43.223A | Poisoning by selective serotonin reuptake inhibitors, assault, initial encounter                          |  |  |
| T43.224A | Poisoning by selective serotonin reuptake inhibitors, undetermined, initial encounter                     |  |  |
| T43.225A | Adverse effect of selective serotonin reuptake inhibitors, initial encounter                              |  |  |
| T43.291A | Poisoning by other antidepressants, accidental (unintentional), initial encounter                         |  |  |
| T43.292A | Poisoning by other antidepressants, intentional self-harm, initial encounter                              |  |  |
| T43.293A | Poisoning by other antidepressants, assault, initial encounter                                            |  |  |
| T43.294A | Poisoning by other antidepressants, undetermined, initial encounter                                       |  |  |
| T43.295A | Adverse effect of other antidepressants, initial encounter                                                |  |  |
| T43.3X1A | Poisoning by phenothiazine antipsychotics and neuroleptics, accidental (unintentional), initial encounter |  |  |
| T43.3X2A | Poisoning by phenothiazine antipsychotics and neuroleptics, intentional self-harm, initial encounter      |  |  |
| T43.3X3A | Poisoning by phenothiazine antipsychotics and neuroleptics, assault, initial encounter                    |  |  |
| T43.3X4A | Poisoning by phenothiazine antipsychotics and neuroleptics, undetermined, initial encounter               |  |  |
| T43.3X5A | Adverse effect of phenothiazine antipsychotics and neuroleptics, initial encounter                        |  |  |
| T43.4X1A | Poisoning by butyrophenone and thiothixene neuroleptics, accidental (unintentional), initial encounter    |  |  |
| T43.4X2A | Poisoning by butyrophenone and thiothixene neuroleptics, intentional self-harm, initial encounter         |  |  |
| T43.4X3A | Poisoning by butyrophenone and thiothixene neuroleptics, assault, initial encounter                       |  |  |
| T43.4X4A | Poisoning by butyrophenone and thiothixene neuroleptics, undetermined, initial encounter                  |  |  |
| T43.4X5A | Adverse effect of butyrophenone and thiothixene neuroleptics, initial encounter                           |  |  |
| T43.501A | Poisoning by unspecified antipsychotics and neuroleptics, accidental (unintentional), initial encounter   |  |  |
| T43.502A | Poisoning by unspecified antipsychotics and neuroleptics, intentional self-harm, initial encounter        |  |  |

|          |                                                                                                   |  |  |
|----------|---------------------------------------------------------------------------------------------------|--|--|
| T43.503A | Poisoning by unspecified antipsychotics and neuroleptics, assault, initial encounter              |  |  |
| T43.504A | Poisoning by unspecified antipsychotics and neuroleptics, undetermined, initial encounter         |  |  |
| T43.505A | Adverse effect of unspecified antipsychotics and neuroleptics, initial encounter                  |  |  |
| T43.591A | Poisoning by other antipsychotics and neuroleptics, accidental (unintentional), initial encounter |  |  |
| T43.592A | Poisoning by other antipsychotics and neuroleptics, intentional self-harm, initial encounter      |  |  |
| T43.593A | Poisoning by other antipsychotics and neuroleptics, assault, initial encounter                    |  |  |
| T43.594A | Poisoning by other antipsychotics and neuroleptics, undetermined, initial encounter               |  |  |
| T43.595A | Adverse effect of other antipsychotics and neuroleptics, initial encounter                        |  |  |
| T43.601A | Poisoning by unspecified psychostimulants, accidental (unintentional), initial encounter          |  |  |
| T43.602A | Poisoning by unspecified psychostimulants, intentional self-harm, initial encounter               |  |  |
| T43.603A | Poisoning by unspecified psychostimulants, assault, initial encounter                             |  |  |
| T43.604A | Poisoning by unspecified psychostimulants, undetermined, initial encounter                        |  |  |
| T43.605A | Adverse effect of unspecified psychostimulants, initial encounter                                 |  |  |
| T43.611A | Poisoning by caffeine, accidental (unintentional), initial encounter                              |  |  |
| T43.612A | Poisoning by caffeine, intentional self-harm, initial encounter                                   |  |  |
| T43.613A | Poisoning by caffeine, assault, initial encounter                                                 |  |  |
| T43.614A | Poisoning by caffeine, undetermined, initial encounter                                            |  |  |
| T43.615A | Adverse effect of caffeine, initial encounter                                                     |  |  |
| T43.621A | Poisoning by amphetamines, accidental (unintentional), initial encounter                          |  |  |
| T43.622A | Poisoning by amphetamines, intentional self-harm, initial encounter                               |  |  |
| T43.623A | Poisoning by amphetamines, assault, initial encounter                                             |  |  |

|          |                                                                                           |  |  |
|----------|-------------------------------------------------------------------------------------------|--|--|
| T43.624A | Poisoning by amphetamines, undetermined, initial encounter                                |  |  |
| T43.625A | Adverse effect of amphetamines, initial encounter                                         |  |  |
| T43.631A | Poisoning by methylphenidate, accidental (unintentional), initial encounter               |  |  |
| T43.632A | Poisoning by methylphenidate, intentional self-harm, initial encounter                    |  |  |
| T43.633A | Poisoning by methylphenidate, assault, initial encounter                                  |  |  |
| T43.634A | Poisoning by methylphenidate, undetermined, initial encounter                             |  |  |
| T43.635A | Adverse effect of methylphenidate, initial encounter                                      |  |  |
| T43.691A | Poisoning by other psychostimulants, accidental (unintentional), initial encounter        |  |  |
| T43.692A | Poisoning by other psychostimulants, intentional self-harm, initial encounter             |  |  |
| T43.693A | Poisoning by other psychostimulants, assault, initial encounter                           |  |  |
| T43.694A | Poisoning by other psychostimulants, undetermined, initial encounter                      |  |  |
| T43.695A | Adverse effect of other psychostimulants, initial encounter                               |  |  |
| T43.8X1A | Poisoning by other psychotropic drugs, accidental (unintentional), initial encounter      |  |  |
| T43.8X2A | Poisoning by other psychotropic drugs, intentional self-harm, initial encounter           |  |  |
| T43.8X3A | Poisoning by other psychotropic drugs, assault, initial encounter                         |  |  |
| T43.8X4A | Poisoning by other psychotropic drugs, undetermined, initial encounter                    |  |  |
| T43.8X5A | Adverse effect of other psychotropic drugs, initial encounter                             |  |  |
| T43.91XA | Poisoning by unspecified psychotropic drug, accidental (unintentional), initial encounter |  |  |
| T43.92XA | Poisoning by unspecified psychotropic drug, intentional self-harm, initial encounter      |  |  |
| T43.93XA | Poisoning by unspecified psychotropic drug, assault, initial encounter                    |  |  |
| T43.94XA | Poisoning by unspecified psychotropic drug, undetermined, initial encounter               |  |  |

|          |                                                                                                                                              |  |  |
|----------|----------------------------------------------------------------------------------------------------------------------------------------------|--|--|
| T43.95XA | Adverse effect of unspecified psychotropic drug, initial encounter                                                                           |  |  |
| T44.0X1A | Poisoning by anticholinesterase agents, accidental (unintentional), initial encounter                                                        |  |  |
| T44.0X2A | Poisoning by anticholinesterase agents, intentional self-harm, initial encounter                                                             |  |  |
| T44.0X3A | Poisoning by anticholinesterase agents, assault, initial encounter                                                                           |  |  |
| T44.0X4A | Poisoning by anticholinesterase agents, undetermined, initial encounter                                                                      |  |  |
| T44.0X5A | Adverse effect of anticholinesterase agents, initial encounter                                                                               |  |  |
| T44.1X1A | Poisoning by other parasympathomimetics [cholinergics], accidental (unintentional), initial encounter                                        |  |  |
| T44.1X2A | Poisoning by other parasympathomimetics [cholinergics], intentional self-harm, initial encounter                                             |  |  |
| T44.1X3A | Poisoning by other parasympathomimetics [cholinergics], assault, initial encounter                                                           |  |  |
| T44.1X4A | Poisoning by other parasympathomimetics [cholinergics], undetermined, initial encounter                                                      |  |  |
| T44.1X5A | Adverse effect of other parasympathomimetics [cholinergics], initial encounter                                                               |  |  |
| T44.2X1A | Poisoning by ganglionic blocking drugs, accidental (unintentional), initial encounter                                                        |  |  |
| T44.2X2A | Poisoning by ganglionic blocking drugs, intentional self-harm, initial encounter                                                             |  |  |
| T44.2X3A | Poisoning by ganglionic blocking drugs, assault, initial encounter                                                                           |  |  |
| T44.2X4A | Poisoning by ganglionic blocking drugs, undetermined, initial encounter                                                                      |  |  |
| T44.2X5A | Adverse effect of ganglionic blocking drugs, initial encounter                                                                               |  |  |
| T44.3X1A | Poisoning by other parasympatholytics [anticholinergics and antimuscarinics] and spasmolytics, accidental (unintentional), initial encounter |  |  |
| T44.3X2A | Poisoning by other parasympatholytics [anticholinergics and antimuscarinics] and spasmolytics, intentional self-harm, initial encounter      |  |  |



|          |                                                                                                                                |  |  |
|----------|--------------------------------------------------------------------------------------------------------------------------------|--|--|
| T44.3X3A | Poisoning by other parasympatholytics [anticholinergics and antimuscarinics] and spasmolytics, assault, initial encounter      |  |  |
| T44.3X4A | Poisoning by other parasympatholytics [anticholinergics and antimuscarinics] and spasmolytics, undetermined, initial encounter |  |  |
| T44.3X5A | Adverse effect of other parasympatholytics [anticholinergics and antimuscarinics] and spasmolytics, initial encounter          |  |  |
| T44.4X1A | Poisoning by predominantly alpha-adrenoreceptor agonists, accidental (unintentional), initial encounter                        |  |  |
| T44.4X2A | Poisoning by predominantly alpha-adrenoreceptor agonists, intentional self-harm, initial encounter                             |  |  |
| T44.4X3A | Poisoning by predominantly alpha-adrenoreceptor agonists, assault, initial encounter                                           |  |  |
| T44.4X4A | Poisoning by predominantly alpha-adrenoreceptor agonists, undetermined, initial encounter                                      |  |  |
| T44.4X5A | Adverse effect of predominantly alpha-adrenoreceptor agonists, initial encounter                                               |  |  |
| T44.5X1A | Poisoning by predominantly beta-adrenoreceptor agonists, accidental (unintentional), initial encounter                         |  |  |
| T44.5X2A | Poisoning by predominantly beta-adrenoreceptor agonists, intentional self-harm, initial encounter                              |  |  |
| T44.5X3A | Poisoning by predominantly beta-adrenoreceptor agonists, assault, initial encounter                                            |  |  |
| T44.5X4A | Poisoning by predominantly beta-adrenoreceptor agonists, undetermined, initial encounter                                       |  |  |
| T44.5X5A | Adverse effect of predominantly beta-adrenoreceptor agonists, initial encounter                                                |  |  |
| T44.6X1A | Poisoning by alpha-adrenoreceptor antagonists, accidental (unintentional), initial encounter                                   |  |  |
| T44.6X2A | Poisoning by alpha-adrenoreceptor antagonists, intentional self-harm, initial encounter                                        |  |  |
| T44.6X3A | Poisoning by alpha-adrenoreceptor antagonists, assault, initial encounter                                                      |  |  |
| T44.6X4A | Poisoning by alpha-adrenoreceptor antagonists, undetermined, initial encounter                                                 |  |  |
| T44.6X5A | Adverse effect of alpha-adrenoreceptor antagonists, initial encounter                                                          |  |  |

|          |                                                                                                                                |  |  |
|----------|--------------------------------------------------------------------------------------------------------------------------------|--|--|
| T44.7X1A | Poisoning by beta-adrenoreceptor antagonists, accidental (unintentional), initial encounter                                    |  |  |
| T44.7X2A | Poisoning by beta-adrenoreceptor antagonists, intentional self-harm, initial encounter                                         |  |  |
| T44.7X3A | Poisoning by beta-adrenoreceptor antagonists, assault, initial encounter                                                       |  |  |
| T44.7X4A | Poisoning by beta-adrenoreceptor antagonists, undetermined, initial encounter                                                  |  |  |
| T44.7X5A | Adverse effect of beta-adrenoreceptor antagonists, initial encounter                                                           |  |  |
| T44.8X1A | Poisoning by centrally-acting and adrenergic-neuron-blocking agents, accidental (unintentional), initial encounter             |  |  |
| T44.8X2A | Poisoning by centrally-acting and adrenergic-neuron-blocking agents, intentional self-harm, initial encounter                  |  |  |
| T44.8X3A | Poisoning by centrally-acting and adrenergic-neuron-blocking agents, assault, initial encounter                                |  |  |
| T44.8X4A | Poisoning by centrally-acting and adrenergic-neuron-blocking agents, undetermined, initial encounter                           |  |  |
| T44.8X5A | Adverse effect of centrally-acting and adrenergic-neuron-blocking agents, initial encounter                                    |  |  |
| T44.901A | Poisoning by unspecified drugs primarily affecting the autonomic nervous system, accidental (unintentional), initial encounter |  |  |
| T44.902A | Poisoning by unspecified drugs primarily affecting the autonomic nervous system, intentional self-harm, initial encounter      |  |  |
| T44.903A | Poisoning by unspecified drugs primarily affecting the autonomic nervous system, assault, initial encounter                    |  |  |
| T44.904A | Poisoning by unspecified drugs primarily affecting the autonomic nervous system, undetermined, initial encounter               |  |  |
| T44.905A | Adverse effect of unspecified drugs primarily affecting the autonomic nervous system, initial encounter                        |  |  |
| T44.991A | Poisoning by other drug primarily affecting the autonomic nervous system, accidental (unintentional), initial encounter        |  |  |
| T44.992A | Poisoning by other drug primarily affecting the autonomic nervous system, intentional self-harm, initial encounter             |  |  |

|          |                                                                                                                      |  |  |
|----------|----------------------------------------------------------------------------------------------------------------------|--|--|
| T44.993A | Poisoning by other drug primarily affecting the autonomic nervous system, assault, initial encounter                 |  |  |
| T44.994A | Poisoning by other drug primarily affecting the autonomic nervous system, undetermined, initial encounter            |  |  |
| T44.995A | Adverse effect of other drug primarily affecting the autonomic nervous system, initial encounter                     |  |  |
| T46.0X1A | Poisoning by cardiac-stimulant glycosides and drugs of similar action, accidental (unintentional), initial encounter |  |  |
| T46.0X2A | Poisoning by cardiac-stimulant glycosides and drugs of similar action, intentional self-harm, initial encounter      |  |  |
| T46.0X3A | Poisoning by cardiac-stimulant glycosides and drugs of similar action, assault, initial encounter                    |  |  |
| T46.0X4A | Poisoning by cardiac-stimulant glycosides and drugs of similar action, undetermined, initial encounter               |  |  |
| T46.0X5A | Adverse effect of cardiac-stimulant glycosides and drugs of similar action, initial encounter                        |  |  |
| T46.1X1A | Poisoning by calcium-channel blockers, accidental (unintentional), initial encounter                                 |  |  |
| T46.1X2A | Poisoning by calcium-channel blockers, intentional self-harm, initial encounter                                      |  |  |
| T46.1X3A | Poisoning by calcium-channel blockers, assault, initial encounter                                                    |  |  |
| T46.1X4A | Poisoning by calcium-channel blockers, undetermined, initial encounter                                               |  |  |
| T46.1X5A | Adverse effect of calcium-channel blockers, initial encounter                                                        |  |  |
| T46.2X1A | Poisoning by other antidysrhythmic drugs, accidental (unintentional), initial encounter                              |  |  |
| T46.2X2A | Poisoning by other antidysrhythmic drugs, intentional self-harm, initial encounter                                   |  |  |
| T46.2X3A | Poisoning by other antidysrhythmic drugs, assault, initial encounter                                                 |  |  |
| T46.2X4A | Poisoning by other antidysrhythmic drugs, undetermined, initial encounter                                            |  |  |
| T46.2X5A | Adverse effect of other antidysrhythmic drugs, initial encounter                                                     |  |  |
| T46.3X1A | Poisoning by coronary vasodilators, accidental (unintentional), initial encounter                                    |  |  |

|          |                                                                                                               |  |  |
|----------|---------------------------------------------------------------------------------------------------------------|--|--|
| T46.3X2A | Poisoning by coronary vasodilators, intentional self-harm, initial encounter                                  |  |  |
| T46.3X3A | Poisoning by coronary vasodilators, assault, initial encounter                                                |  |  |
| T46.3X4A | Poisoning by coronary vasodilators, undetermined, initial encounter                                           |  |  |
| T46.3X5A | Adverse effect of coronary vasodilators, initial encounter                                                    |  |  |
| T46.4X1A | Poisoning by angiotensin-converting-enzyme inhibitors, accidental (unintentional), initial encounter          |  |  |
| T46.4X2A | Poisoning by angiotensin-converting-enzyme inhibitors, intentional self-harm, initial encounter               |  |  |
| T46.4X3A | Poisoning by angiotensin-converting-enzyme inhibitors, assault, initial encounter                             |  |  |
| T46.4X4A | Poisoning by angiotensin-converting-enzyme inhibitors, undetermined, initial encounter                        |  |  |
| T46.4X5A | Adverse effect of angiotensin-converting-enzyme inhibitors, initial encounter                                 |  |  |
| T46.5X1A | Poisoning by other antihypertensive drugs, accidental (unintentional), initial encounter                      |  |  |
| T46.5X2A | Poisoning by other antihypertensive drugs, intentional self-harm, initial encounter                           |  |  |
| T46.5X3A | Poisoning by other antihypertensive drugs, assault, initial encounter                                         |  |  |
| T46.5X4A | Poisoning by other antihypertensive drugs, undetermined, initial encounter                                    |  |  |
| T46.5X5A | Adverse effect of other antihypertensive drugs, initial encounter                                             |  |  |
| T46.6X1A | Poisoning by antihyperlipidemic and antiarteriosclerotic drugs, accidental (unintentional), initial encounter |  |  |
| T46.6X2A | Poisoning by antihyperlipidemic and antiarteriosclerotic drugs, intentional self-harm, initial encounter      |  |  |
| T46.6X3A | Poisoning by antihyperlipidemic and antiarteriosclerotic drugs, assault, initial encounter                    |  |  |
| T46.6X4A | Poisoning by antihyperlipidemic and antiarteriosclerotic drugs, undetermined, initial encounter               |  |  |
| T46.6X5A | Adverse effect of antihyperlipidemic and antiarteriosclerotic drugs, initial encounter                        |  |  |
| T46.7X1A | Poisoning by peripheral vasodilators, accidental (unintentional), initial encounter                           |  |  |

|          |                                                                                                                              |  |  |
|----------|------------------------------------------------------------------------------------------------------------------------------|--|--|
| T46.7X2A | Poisoning by peripheral vasodilators, intentional self-harm, initial encounter                                               |  |  |
| T46.7X3A | Poisoning by peripheral vasodilators, assault, initial encounter                                                             |  |  |
| T46.7X4A | Poisoning by peripheral vasodilators, undetermined, initial encounter                                                        |  |  |
| T46.7X5A | Adverse effect of peripheral vasodilators, initial encounter                                                                 |  |  |
| T46.8X1A | Poisoning by antivaricose drugs, including sclerosing agents, accidental (unintentional), initial encounter                  |  |  |
| T46.8X2A | Poisoning by antivaricose drugs, including sclerosing agents, intentional self-harm, initial encounter                       |  |  |
| T46.8X3A | Poisoning by antivaricose drugs, including sclerosing agents, assault, initial encounter                                     |  |  |
| T46.8X4A | Poisoning by antivaricose drugs, including sclerosing agents, undetermined, initial encounter                                |  |  |
| T46.8X5A | Adverse effect of antivaricose drugs, including sclerosing agents, initial encounter                                         |  |  |
| T46.901A | Poisoning by unspecified agents primarily affecting the cardiovascular system, accidental (unintentional), initial encounter |  |  |
| T46.902A | Poisoning by unspecified agents primarily affecting the cardiovascular system, intentional self-harm, initial encounter      |  |  |
| T46.903A | Poisoning by unspecified agents primarily affecting the cardiovascular system, assault, initial encounter                    |  |  |
| T46.904A | Poisoning by unspecified agents primarily affecting the cardiovascular system, undetermined, initial encounter               |  |  |
| T46.905A | Adverse effect of unspecified agents primarily affecting the cardiovascular system, initial encounter                        |  |  |
| T46.991A | Poisoning by other agents primarily affecting the cardiovascular system, accidental (unintentional), initial encounter       |  |  |
| T46.992A | Poisoning by other agents primarily affecting the cardiovascular system, intentional self-harm, initial encounter            |  |  |
| T46.993A | Poisoning by other agents primarily affecting the cardiovascular system, assault, initial encounter                          |  |  |

|          |                                                                                                          |  |  |
|----------|----------------------------------------------------------------------------------------------------------|--|--|
| T46.994A | Poisoning by other agents primarily affecting the cardiovascular system, undetermined, initial encounter |  |  |
| T46.995A | Adverse effect of other agents primarily affecting the cardiovascular system, initial encounter          |  |  |
| T51.0X1A | Toxic effect of ethanol, accidental (unintentional), initial encounter                                   |  |  |
| T51.0X2A | Toxic effect of ethanol, intentional self-harm, initial encounter                                        |  |  |
| T51.0X3A | Toxic effect of ethanol, assault, initial encounter                                                      |  |  |
| T51.0X4A | Toxic effect of ethanol, undetermined, initial encounter                                                 |  |  |
| T51.1X1A | Toxic effect of methanol, accidental (unintentional), initial encounter                                  |  |  |
| T51.1X2A | Toxic effect of methanol, intentional self-harm, initial encounter                                       |  |  |
| T51.1X3A | Toxic effect of methanol, assault, initial encounter                                                     |  |  |
| T51.1X4A | Toxic effect of methanol, undetermined, initial encounter                                                |  |  |
| T51.2X1A | Toxic effect of 2-Propanol, accidental (unintentional), initial encounter                                |  |  |
| T51.2X2A | Toxic effect of 2-Propanol, intentional self-harm, initial encounter                                     |  |  |
| T51.2X3A | Toxic effect of 2-Propanol, assault, initial encounter                                                   |  |  |
| T51.2X4A | Toxic effect of 2-Propanol, undetermined, initial encounter                                              |  |  |
| T51.3X1A | Toxic effect of fusel oil, accidental (unintentional), initial encounter                                 |  |  |
| T51.3X2A | Toxic effect of fusel oil, intentional self-harm, initial encounter                                      |  |  |
| T51.3X3A | Toxic effect of fusel oil, assault, initial encounter                                                    |  |  |
| T51.3X4A | Toxic effect of fusel oil, undetermined, initial encounter                                               |  |  |
| T51.8X1A | Toxic effect of other alcohols, accidental (unintentional), initial encounter                            |  |  |
| T51.8X2A | Toxic effect of other alcohols, intentional self-harm, initial encounter                                 |  |  |
| T51.8X3A | Toxic effect of other alcohols, assault, initial encounter                                               |  |  |
| T51.8X4A | Toxic effect of other alcohols, undetermined, initial encounter                                          |  |  |
| T51.91XA | Toxic effect of unspecified alcohol, accidental (unintentional), initial encounter                       |  |  |

|          |                                                                                      |  |  |
|----------|--------------------------------------------------------------------------------------|--|--|
| T51.92XA | Toxic effect of unspecified alcohol, intentional self-harm, initial encounter        |  |  |
| T51.93XA | Toxic effect of unspecified alcohol, assault, initial encounter                      |  |  |
| T51.94XA | Toxic effect of unspecified alcohol, undetermined, initial encounter                 |  |  |
| T52.0X1A | Toxic effect of petroleum products, accidental (unintentional), initial encounter    |  |  |
| T52.0X2A | Toxic effect of petroleum products, intentional self-harm, initial encounter         |  |  |
| T52.0X3A | Toxic effect of petroleum products, assault, initial encounter                       |  |  |
| T52.0X4A | Toxic effect of petroleum products, undetermined, initial encounter                  |  |  |
| T52.1X1A | Toxic effect of benzene, accidental (unintentional), initial encounter               |  |  |
| T52.1X2A | Toxic effect of benzene, intentional self-harm, initial encounter                    |  |  |
| T52.1X3A | Toxic effect of benzene, assault, initial encounter                                  |  |  |
| T52.1X4A | Toxic effect of benzene, undetermined, initial encounter                             |  |  |
| T52.2X1A | Toxic effect of homologues of benzene, accidental (unintentional), initial encounter |  |  |
| T52.2X2A | Toxic effect of homologues of benzene, intentional self-harm, initial encounter      |  |  |
| T52.2X3A | Toxic effect of homologues of benzene, assault, initial encounter                    |  |  |
| T52.2X4A | Toxic effect of homologues of benzene, undetermined, initial encounter               |  |  |
| T52.3X1A | Toxic effect of glycols, accidental (unintentional), initial encounter               |  |  |
| T52.3X2A | Toxic effect of glycols, intentional self-harm, initial encounter                    |  |  |
| T52.3X3A | Toxic effect of glycols, assault, initial encounter                                  |  |  |
| T52.3X4A | Toxic effect of glycols, undetermined, initial encounter                             |  |  |
| T52.4X1A | Toxic effect of ketones, accidental (unintentional), initial encounter               |  |  |
| T52.4X2A | Toxic effect of ketones, intentional self-harm, initial encounter                    |  |  |
| T52.4X3A | Toxic effect of ketones, assault, initial encounter                                  |  |  |

|          |                                                                                            |  |  |
|----------|--------------------------------------------------------------------------------------------|--|--|
| T52.4X4A | Toxic effect of ketones, undetermined, initial encounter                                   |  |  |
| T52.8X1A | Toxic effect of other organic solvents, accidental (unintentional), initial encounter      |  |  |
| T52.8X2A | Toxic effect of other organic solvents, intentional self-harm, initial encounter           |  |  |
| T52.8X3A | Toxic effect of other organic solvents, assault, initial encounter                         |  |  |
| T52.8X4A | Toxic effect of other organic solvents, undetermined, initial encounter                    |  |  |
| T52.91XA | Toxic effect of unspecified organic solvent, accidental (unintentional), initial encounter |  |  |
| T52.92XA | Toxic effect of unspecified organic solvent, intentional self-harm, initial encounter      |  |  |
| T52.93XA | Toxic effect of unspecified organic solvent, assault, initial encounter                    |  |  |
| T52.94XA | Toxic effect of unspecified organic solvent, undetermined, initial encounter               |  |  |
| T53.0X1A | Toxic effect of carbon tetrachloride, accidental (unintentional), initial encounter        |  |  |
| T53.0X2A | Toxic effect of carbon tetrachloride, intentional self-harm, initial encounter             |  |  |
| T53.0X3A | Toxic effect of carbon tetrachloride, assault, initial encounter                           |  |  |
| T53.0X4A | Toxic effect of carbon tetrachloride, undetermined, initial encounter                      |  |  |
| T53.1X1A | Toxic effect of chloroform, accidental (unintentional), initial encounter                  |  |  |
| T53.1X2A | Toxic effect of chloroform, intentional self-harm, initial encounter                       |  |  |
| T53.1X3A | Toxic effect of chloroform, assault, initial encounter                                     |  |  |
| T53.1X4A | Toxic effect of chloroform, undetermined, initial encounter                                |  |  |
| T53.2X1A | Toxic effect of trichloroethylene, accidental (unintentional), initial encounter           |  |  |
| T53.2X2A | Toxic effect of trichloroethylene, intentional self-harm, initial encounter                |  |  |
| T53.2X3A | Toxic effect of trichloroethylene, assault, initial encounter                              |  |  |
| T53.2X4A | Toxic effect of trichloroethylene, undetermined, initial encounter                         |  |  |



|          |                                                                                                                    |  |  |
|----------|--------------------------------------------------------------------------------------------------------------------|--|--|
| T53.3X1A | Toxic effect of tetrachloroethylene, accidental (unintentional), initial encounter                                 |  |  |
| T53.3X2A | Toxic effect of tetrachloroethylene, intentional self-harm, initial encounter                                      |  |  |
| T53.3X3A | Toxic effect of tetrachloroethylene, assault, initial encounter                                                    |  |  |
| T53.3X4A | Toxic effect of tetrachloroethylene, undetermined, initial encounter                                               |  |  |
| T53.4X1A | Toxic effect of dichloromethane, accidental (unintentional), initial encounter                                     |  |  |
| T53.4X2A | Toxic effect of dichloromethane, intentional self-harm, initial encounter                                          |  |  |
| T53.4X3A | Toxic effect of dichloromethane, assault, initial encounter                                                        |  |  |
| T53.4X4A | Toxic effect of dichloromethane, undetermined, initial encounter                                                   |  |  |
| T53.5X1A | Toxic effect of chlorofluorocarbons, accidental (unintentional), initial encounter                                 |  |  |
| T53.5X2A | Toxic effect of chlorofluorocarbons, intentional self-harm, initial encounter                                      |  |  |
| T53.5X3A | Toxic effect of chlorofluorocarbons, assault, initial encounter                                                    |  |  |
| T53.5X4A | Toxic effect of chlorofluorocarbons, undetermined, initial encounter                                               |  |  |
| T53.6X1A | Toxic effect of other halogen derivatives of aliphatic hydrocarbons, accidental (unintentional), initial encounter |  |  |
| T53.6X2A | Toxic effect of other halogen derivatives of aliphatic hydrocarbons, intentional self-harm, initial encounter      |  |  |
| T53.6X3A | Toxic effect of other halogen derivatives of aliphatic hydrocarbons, assault, initial encounter                    |  |  |
| T53.6X4A | Toxic effect of other halogen derivatives of aliphatic hydrocarbons, undetermined, initial encounter               |  |  |
| T53.7X1A | Toxic effect of other halogen derivatives of aromatic hydrocarbons, accidental (unintentional), initial encounter  |  |  |
| T53.7X2A | Toxic effect of other halogen derivatives of aromatic hydrocarbons, intentional self-harm, initial encounter       |  |  |
| T53.7X3A | Toxic effect of other halogen derivatives of aromatic hydrocarbons, assault, initial encounter                     |  |  |
| T53.7X4A | Toxic effect of other halogen derivatives of aromatic hydrocarbons, undetermined, initial encounter                |  |  |

|          |                                                                                                                                       |  |  |
|----------|---------------------------------------------------------------------------------------------------------------------------------------|--|--|
| T53.91XA | Toxic effect of unspecified halogen derivatives of aliphatic and aromatic hydrocarbons, accidental (unintentional), initial encounter |  |  |
| T53.92XA | Toxic effect of unspecified halogen derivatives of aliphatic and aromatic hydrocarbons, intentional self-harm, initial encounter      |  |  |
| T53.93XA | Toxic effect of unspecified halogen derivatives of aliphatic and aromatic hydrocarbons, assault, initial encounter                    |  |  |
| T53.94XA | Toxic effect of unspecified halogen derivatives of aliphatic and aromatic hydrocarbons, undetermined, initial encounter               |  |  |
| T54.0X1A | Toxic effect of phenol and phenol homologues, accidental (unintentional), initial encounter                                           |  |  |
| T54.0X2A | Toxic effect of phenol and phenol homologues, intentional self-harm, initial encounter                                                |  |  |
| T54.0X3A | Toxic effect of phenol and phenol homologues, assault, initial encounter                                                              |  |  |
| T54.0X4A | Toxic effect of phenol and phenol homologues, undetermined, initial encounter                                                         |  |  |
| T54.1X1A | Toxic effect of other corrosive organic compounds, accidental (unintentional), initial encounter                                      |  |  |
| T54.1X2A | Toxic effect of other corrosive organic compounds, intentional self-harm, initial encounter                                           |  |  |
| T54.1X3A | Toxic effect of other corrosive organic compounds, assault, initial encounter                                                         |  |  |
| T54.1X4A | Toxic effect of other corrosive organic compounds, undetermined, initial encounter                                                    |  |  |
| T54.2X1A | Toxic effect of corrosive acids and acid-like substances, accidental (unintentional), initial encounter                               |  |  |
| T54.2X2A | Toxic effect of corrosive acids and acid-like substances, intentional self-harm, initial encounter                                    |  |  |
| T54.2X3A | Toxic effect of corrosive acids and acid-like substances, assault, initial encounter                                                  |  |  |
| T54.2X4A | Toxic effect of corrosive acids and acid-like substances, undetermined, initial encounter                                             |  |  |
| T54.3X1A | Toxic effect of corrosive alkalis and alkali-like substances, accidental (unintentional), initial encounter                           |  |  |

|          |                                                                                                        |  |  |
|----------|--------------------------------------------------------------------------------------------------------|--|--|
| T54.3X2A | Toxic effect of corrosive alkalis and alkali-like substances, intentional self-harm, initial encounter |  |  |
| T54.3X3A | Toxic effect of corrosive alkalis and alkali-like substances, assault, initial encounter               |  |  |
| T54.3X4A | Toxic effect of corrosive alkalis and alkali-like substances, undetermined, initial encounter          |  |  |
| T54.91XA | Toxic effect of unspecified corrosive substance, accidental (unintentional), initial encounter         |  |  |
| T54.92XA | Toxic effect of unspecified corrosive substance, intentional self-harm, initial encounter              |  |  |
| T54.93XA | Toxic effect of unspecified corrosive substance, assault, initial encounter                            |  |  |
| T54.94XA | Toxic effect of unspecified corrosive substance, undetermined, initial encounter                       |  |  |
| T57.0X1A | Toxic effect of arsenic and its compounds, accidental (unintentional), initial encounter               |  |  |
| T57.0X2A | Toxic effect of arsenic and its compounds, intentional self-harm, initial encounter                    |  |  |
| T57.0X3A | Toxic effect of arsenic and its compounds, assault, initial encounter                                  |  |  |
| T57.0X4A | Toxic effect of arsenic and its compounds, undetermined, initial encounter                             |  |  |
| T57.1X1A | Toxic effect of phosphorus and its compounds, accidental (unintentional), initial encounter            |  |  |
| T57.1X2A | Toxic effect of phosphorus and its compounds, intentional self-harm, initial encounter                 |  |  |
| T57.1X3A | Toxic effect of phosphorus and its compounds, assault, initial encounter                               |  |  |
| T57.1X4A | Toxic effect of phosphorus and its compounds, undetermined, initial encounter                          |  |  |
| T57.2X1A | Toxic effect of manganese and its compounds, accidental (unintentional), initial encounter             |  |  |
| T57.2X2A | Toxic effect of manganese and its compounds, intentional self-harm, initial encounter                  |  |  |
| T57.2X3A | Toxic effect of manganese and its compounds, assault, initial encounter                                |  |  |
| T57.2X4A | Toxic effect of manganese and its compounds, undetermined, initial encounter                           |  |  |

|          |                                                                                                           |  |  |
|----------|-----------------------------------------------------------------------------------------------------------|--|--|
| T57.3X1A | Toxic effect of hydrogen cyanide, accidental (unintentional), initial encounter                           |  |  |
| T57.3X2A | Toxic effect of hydrogen cyanide, intentional self-harm, initial encounter                                |  |  |
| T57.3X3A | Toxic effect of hydrogen cyanide, assault, initial encounter                                              |  |  |
| T57.3X4A | Toxic effect of hydrogen cyanide, undetermined, initial encounter                                         |  |  |
| T57.8X1A | Toxic effect of other specified inorganic substances, accidental (unintentional), initial encounter       |  |  |
| T57.8X2A | Toxic effect of other specified inorganic substances, intentional self-harm, initial encounter            |  |  |
| T57.8X3A | Toxic effect of other specified inorganic substances, assault, initial encounter                          |  |  |
| T57.8X4A | Toxic effect of other specified inorganic substances, undetermined, initial encounter                     |  |  |
| T57.91XA | Toxic effect of unspecified inorganic substance, accidental (unintentional), initial encounter            |  |  |
| T57.92XA | Toxic effect of unspecified inorganic substance, intentional self-harm, initial encounter                 |  |  |
| T57.93XA | Toxic effect of unspecified inorganic substance, assault, initial encounter                               |  |  |
| T57.94XA | Toxic effect of unspecified inorganic substance, undetermined, initial encounter                          |  |  |
| T58.01XA | Toxic effect of carbon monoxide from motor vehicle exhaust, accidental (unintentional), initial encounter |  |  |
| T58.02XA | Toxic effect of carbon monoxide from motor vehicle exhaust, intentional self-harm, initial encounter      |  |  |
| T58.03XA | Toxic effect of carbon monoxide from motor vehicle exhaust, assault, initial encounter                    |  |  |
| T58.04XA | Toxic effect of carbon monoxide from motor vehicle exhaust, undetermined, initial encounter               |  |  |
| T58.11XA | Toxic effect of carbon monoxide from utility gas, accidental (unintentional), initial encounter           |  |  |
| T58.12XA | Toxic effect of carbon monoxide from utility gas, intentional self-harm, initial encounter                |  |  |
| T58.13XA | Toxic effect of carbon monoxide from utility gas, assault, initial encounter                              |  |  |

|          |                                                                                                                                   |  |  |
|----------|-----------------------------------------------------------------------------------------------------------------------------------|--|--|
| T58.14XA | Toxic effect of carbon monoxide from utility gas, undetermined, initial encounter                                                 |  |  |
| T58.2X1A | Toxic effect of carbon monoxide from incomplete combustion of other domestic fuels, accidental (unintentional), initial encounter |  |  |
| T58.2X2A | Toxic effect of carbon monoxide from incomplete combustion of other domestic fuels, intentional self-harm, initial encounter      |  |  |
| T58.2X3A | Toxic effect of carbon monoxide from incomplete combustion of other domestic fuels, assault, initial encounter                    |  |  |
| T58.2X4A | Toxic effect of carbon monoxide from incomplete combustion of other domestic fuels, undetermined, initial encounter               |  |  |
| T58.8X1A | Toxic effect of carbon monoxide from other source, accidental (unintentional), initial encounter                                  |  |  |
| T58.8X2A | Toxic effect of carbon monoxide from other source, intentional self-harm, initial encounter                                       |  |  |
| T58.8X3A | Toxic effect of carbon monoxide from other source, assault, initial encounter                                                     |  |  |
| T58.8X4A | Toxic effect of carbon monoxide from other source, undetermined, initial encounter                                                |  |  |
| T58.91XA | Toxic effect of carbon monoxide from unspecified source, accidental (unintentional), initial encounter                            |  |  |
| T58.92XA | Toxic effect of carbon monoxide from unspecified source, intentional self-harm, initial encounter                                 |  |  |
| T58.93XA | Toxic effect of carbon monoxide from unspecified source, assault, initial encounter                                               |  |  |
| T58.94XA | Toxic effect of carbon monoxide from unspecified source, undetermined, initial encounter                                          |  |  |
| T59.0X1A | Toxic effect of nitrogen oxides, accidental (unintentional), initial encounter                                                    |  |  |
| T59.0X2A | Toxic effect of nitrogen oxides, intentional self-harm, initial encounter                                                         |  |  |
| T59.0X3A | Toxic effect of nitrogen oxides, assault, initial encounter                                                                       |  |  |
| T59.0X4A | Toxic effect of nitrogen oxides, undetermined, initial encounter                                                                  |  |  |
| T59.1X1A | Toxic effect of sulfur dioxide, accidental (unintentional), initial encounter                                                     |  |  |

|          |                                                                                                   |  |  |
|----------|---------------------------------------------------------------------------------------------------|--|--|
| T59.1X2A | Toxic effect of sulfur dioxide, intentional self-harm, initial encounter                          |  |  |
| T59.1X3A | Toxic effect of sulfur dioxide, assault, initial encounter                                        |  |  |
| T59.1X4A | Toxic effect of sulfur dioxide, undetermined, initial encounter                                   |  |  |
| T59.2X1A | Toxic effect of formaldehyde, accidental (unintentional), initial encounter                       |  |  |
| T59.2X2A | Toxic effect of formaldehyde, intentional self-harm, initial encounter                            |  |  |
| T59.2X3A | Toxic effect of formaldehyde, assault, initial encounter                                          |  |  |
| T59.2X4A | Toxic effect of formaldehyde, undetermined, initial encounter                                     |  |  |
| T59.3X1A | Toxic effect of lacrimogenic gas, accidental (unintentional), initial encounter                   |  |  |
| T59.3X2A | Toxic effect of lacrimogenic gas, intentional self-harm, initial encounter                        |  |  |
| T59.3X3A | Toxic effect of lacrimogenic gas, assault, initial encounter                                      |  |  |
| T59.3X4A | Toxic effect of lacrimogenic gas, undetermined, initial encounter                                 |  |  |
| T59.4X1A | Toxic effect of chlorine gas, accidental (unintentional), initial encounter                       |  |  |
| T59.4X2A | Toxic effect of chlorine gas, intentional self-harm, initial encounter                            |  |  |
| T59.4X3A | Toxic effect of chlorine gas, assault, initial encounter                                          |  |  |
| T59.4X4A | Toxic effect of chlorine gas, undetermined, initial encounter                                     |  |  |
| T59.5X1A | Toxic effect of fluorine gas and hydrogen fluoride, accidental (unintentional), initial encounter |  |  |
| T59.5X2A | Toxic effect of fluorine gas and hydrogen fluoride, intentional self-harm, initial encounter      |  |  |
| T59.5X3A | Toxic effect of fluorine gas and hydrogen fluoride, assault, initial encounter                    |  |  |
| T59.5X4A | Toxic effect of fluorine gas and hydrogen fluoride, undetermined, initial encounter               |  |  |
| T59.6X1A | Toxic effect of hydrogen sulfide, accidental (unintentional), initial encounter                   |  |  |
| T59.6X2A | Toxic effect of hydrogen sulfide, intentional self-harm, initial encounter                        |  |  |
| T59.6X3A | Toxic effect of hydrogen sulfide, assault, initial encounter                                      |  |  |

|          |                                                                                                           |  |  |
|----------|-----------------------------------------------------------------------------------------------------------|--|--|
| T59.6X4A | Toxic effect of hydrogen sulfide, undetermined, initial encounter                                         |  |  |
| T59.7X1A | Toxic effect of carbon dioxide, accidental (unintentional), initial encounter                             |  |  |
| T59.7X2A | Toxic effect of carbon dioxide, intentional self-harm, initial encounter                                  |  |  |
| T59.7X3A | Toxic effect of carbon dioxide, assault, initial encounter                                                |  |  |
| T59.7X4A | Toxic effect of carbon dioxide, undetermined, initial encounter                                           |  |  |
| T59.811A | Toxic effect of smoke, accidental (unintentional), initial encounter                                      |  |  |
| T59.812A | Toxic effect of smoke, intentional self-harm, initial encounter                                           |  |  |
| T59.813A | Toxic effect of smoke, assault, initial encounter                                                         |  |  |
| T59.814A | Toxic effect of smoke, undetermined, initial encounter                                                    |  |  |
| T59.891A | Toxic effect of other specified gases, fumes and vapors, accidental (unintentional), initial encounter    |  |  |
| T59.892A | Toxic effect of other specified gases, fumes and vapors, intentional self-harm, initial encounter         |  |  |
| T59.893A | Toxic effect of other specified gases, fumes and vapors, assault, initial encounter                       |  |  |
| T59.894A | Toxic effect of other specified gases, fumes and vapors, undetermined, initial encounter                  |  |  |
| T59.91XA | Toxic effect of unspecified gases, fumes and vapors, accidental (unintentional), initial encounter        |  |  |
| T59.92XA | Toxic effect of unspecified gases, fumes and vapors, intentional self-harm, initial encounter             |  |  |
| T59.93XA | Toxic effect of unspecified gases, fumes and vapors, assault, initial encounter                           |  |  |
| T59.94XA | Toxic effect of unspecified gases, fumes and vapors, undetermined, initial encounter                      |  |  |
| T60.0X1A | Toxic effect of organophosphate and carbamate insecticides, accidental (unintentional), initial encounter |  |  |
| T60.0X2A | Toxic effect of organophosphate and carbamate insecticides, intentional self-harm, initial encounter      |  |  |
| T60.0X3A | Toxic effect of organophosphate and carbamate insecticides, assault, initial encounter                    |  |  |
| T60.0X4A | Toxic effect of organophosphate and carbamate insecticides, undetermined, initial encounter               |  |  |

|          |                                                                                          |  |  |
|----------|------------------------------------------------------------------------------------------|--|--|
| T60.1X1A | Toxic effect of halogenated insecticides, accidental (unintentional), initial encounter  |  |  |
| T60.1X2A | Toxic effect of halogenated insecticides, intentional self-harm, initial encounter       |  |  |
| T60.1X3A | Toxic effect of halogenated insecticides, assault, initial encounter                     |  |  |
| T60.1X4A | Toxic effect of halogenated insecticides, undetermined, initial encounter                |  |  |
| T60.2X1A | Toxic effect of other insecticides, accidental (unintentional), initial encounter        |  |  |
| T60.2X2A | Toxic effect of other insecticides, intentional self-harm, initial encounter             |  |  |
| T60.2X3A | Toxic effect of other insecticides, assault, initial encounter                           |  |  |
| T60.2X4A | Toxic effect of other insecticides, undetermined, initial encounter                      |  |  |
| T60.3X1A | Toxic effect of herbicides and fungicides, accidental (unintentional), initial encounter |  |  |
| T60.3X2A | Toxic effect of herbicides and fungicides, intentional self-harm, initial encounter      |  |  |
| T60.3X3A | Toxic effect of herbicides and fungicides, assault, initial encounter                    |  |  |
| T60.3X4A | Toxic effect of herbicides and fungicides, undetermined, initial encounter               |  |  |
| T60.4X1A | Toxic effect of rodenticides, accidental (unintentional), initial encounter              |  |  |
| T60.4X2A | Toxic effect of rodenticides, intentional self-harm, initial encounter                   |  |  |
| T60.4X3A | Toxic effect of rodenticides, assault, initial encounter                                 |  |  |
| T60.4X4A | Toxic effect of rodenticides, undetermined, initial encounter                            |  |  |
| T60.8X1A | Toxic effect of other pesticides, accidental (unintentional), initial encounter          |  |  |
| T60.8X2A | Toxic effect of other pesticides, intentional self-harm, initial encounter               |  |  |
| T60.8X3A | Toxic effect of other pesticides, assault, initial encounter                             |  |  |
| T60.8X4A | Toxic effect of other pesticides, undetermined, initial encounter                        |  |  |



|          |                                                                                      |  |  |
|----------|--------------------------------------------------------------------------------------|--|--|
| T60.91XA | Toxic effect of unspecified pesticide, accidental (unintentional), initial encounter |  |  |
| T60.92XA | Toxic effect of unspecified pesticide, intentional self-harm, initial encounter      |  |  |
| T60.93XA | Toxic effect of unspecified pesticide, assault, initial encounter                    |  |  |
| T60.94XA | Toxic effect of unspecified pesticide, undetermined, initial encounter               |  |  |

**Included and Excluded ICD-10-CM Diagnosis Subcodes for Paralytic Ileus and Intestinal Obstruction without Hernia Condition Group**

| Included ICD-10-CM diagnosis subcodes (n=10) |                                                                                | Excluded ICD-10-CM diagnosis subcodes (n=0) |                     |
|----------------------------------------------|--------------------------------------------------------------------------------|---------------------------------------------|---------------------|
| Subcode                                      | Subcode description                                                            | Subcode                                     | Subcode description |
| K56.0                                        | Paralytic ileus                                                                |                                             |                     |
| K56.1                                        | Intussusception                                                                |                                             |                     |
| K56.2                                        | Volvulus                                                                       |                                             |                     |
| K56.3                                        | Gallstone ileus                                                                |                                             |                     |
| K56.41                                       | Fecal impaction                                                                |                                             |                     |
| K56.49                                       | Other impaction of intestine                                                   |                                             |                     |
| K56.5                                        | Intestinal adhesions [bands] with obstruction (postprocedural) (postinfection) |                                             |                     |
| K56.60                                       | Unspecified intestinal obstruction                                             |                                             |                     |
| K56.69                                       | Other intestinal obstruction                                                   |                                             |                     |
| K56.7                                        | Ileus, unspecified                                                             |                                             |                     |

## Included and Excluded ICD-10-CM Diagnosis Subcodes for Pericardial Disease, Endocarditis, and Myocarditis Condition Group

| Included ICD-10-CM diagnosis subcodes (n=26) |                                               | Excluded ICD-10-CM diagnosis subcodes (n=0) |                     |
|----------------------------------------------|-----------------------------------------------|---------------------------------------------|---------------------|
| Subcode                                      | Subcode description                           | Subcode                                     | Subcode description |
| A01.02                                       | Typhoid fever with heart involvement          |                                             |                     |
| A32.82                                       | Listerial endocarditis                        |                                             |                     |
| A39.50                                       | Meningococcal carditis, unspecified           |                                             |                     |
| A39.51                                       | Meningococcal endocarditis                    |                                             |                     |
| A39.52                                       | Meningococcal myocarditis                     |                                             |                     |
| A39.53                                       | Meningococcal pericarditis                    |                                             |                     |
| B37.6                                        | Candidal endocarditis                         |                                             |                     |
| I30.0                                        | Acute nonspecific idiopathic pericarditis     |                                             |                     |
| I30.1                                        | Infective pericarditis                        |                                             |                     |
| I30.8                                        | Other forms of acute pericarditis             |                                             |                     |
| I30.9                                        | Acute pericarditis, unspecified               |                                             |                     |
| I31.0                                        | Chronic adhesive pericarditis                 |                                             |                     |
| I31.1                                        | Chronic constrictive pericarditis             |                                             |                     |
| I31.2                                        | Hemopericardium, not elsewhere classified     |                                             |                     |
| I31.3                                        | Pericardial effusion (noninflammatory)        |                                             |                     |
| I31.4                                        | Cardiac tamponade                             |                                             |                     |
| I31.8                                        | Other specified diseases of pericardium       |                                             |                     |
| I31.9                                        | Disease of pericardium, unspecified           |                                             |                     |
| I32.                                         | Pericarditis in diseases classified elsewhere |                                             |                     |
| I33.0                                        | Acute and subacute infective endocarditis     |                                             |                     |
| I33.9                                        | Acute and subacute endocarditis, unspecified  |                                             |                     |
| I40.0                                        | Infective myocarditis                         |                                             |                     |
| I40.1                                        | Isolated myocarditis                          |                                             |                     |
| I40.8                                        | Other acute myocarditis                       |                                             |                     |
| I40.9                                        | Acute myocarditis, unspecified                |                                             |                     |
| I41.                                         | Myocarditis in diseases classified elsewhere  |                                             |                     |

### Included and Excluded ICD-10-CM Diagnosis Subcodes for Peritonitis Condition Group

| Included ICD-10-CM diagnosis subcodes (n=8) |                                   | Excluded ICD-10-CM diagnosis subcodes (n=0) |                     |
|---------------------------------------------|-----------------------------------|---------------------------------------------|---------------------|
| Subcode                                     | Subcode description               | Subcode                                     | Subcode description |
| A54.85                                      | Gonococcal peritonitis            |                                             |                     |
| K65.0                                       | Generalized (acute) peritonitis   |                                             |                     |
| K65.1                                       | Peritoneal abscess                |                                             |                     |
| K65.2                                       | Spontaneous bacterial peritonitis |                                             |                     |
| K65.3                                       | Choleperitonitis                  |                                             |                     |
| K65.4                                       | Sclerosing mesenteritis           |                                             |                     |
| K65.8                                       | Other peritonitis                 |                                             |                     |
| K65.9                                       | Peritonitis, unspecified          |                                             |                     |

## Included and Excluded ICD-10-CM Diagnosis Subcodes for Pneumonia Condition Group

| Included ICD-10-CM diagnosis subcodes (n=37) |                                                                | Excluded ICD-10-CM diagnosis subcodes (n=0) |                     |
|----------------------------------------------|----------------------------------------------------------------|---------------------------------------------|---------------------|
| Subcode                                      | Subcode description                                            | Subcode                                     | Subcode description |
| A01.03                                       | Typhoid pneumonia                                              |                                             |                     |
| A02.22                                       | Salmonella pneumonia                                           |                                             |                     |
| A20.2                                        | Pneumonic plague                                               |                                             |                     |
| A22.1                                        | Pulmonary anthrax                                              |                                             |                     |
| A42.0                                        | Pulmonary actinomycosis                                        |                                             |                     |
| A54.84                                       | Gonococcal pneumonia                                           |                                             |                     |
| B37.1                                        | Pulmonary candidiasis                                          |                                             |                     |
| J12.0                                        | Adenoviral pneumonia                                           |                                             |                     |
| J12.1                                        | Respiratory syncytial virus pneumonia                          |                                             |                     |
| J12.2                                        | Parainfluenza virus pneumonia                                  |                                             |                     |
| J12.3                                        | Human metapneumovirus pneumonia                                |                                             |                     |
| J12.81                                       | Pneumonia due to SARS-associated coronavirus                   |                                             |                     |
| J12.89                                       | Other viral pneumonia                                          |                                             |                     |
| J12.9                                        | Viral pneumonia, unspecified                                   |                                             |                     |
| J13.                                         | Pneumonia due to Streptococcus pneumoniae                      |                                             |                     |
| J14.                                         | Pneumonia due to Hemophilus influenzae                         |                                             |                     |
| J15.0                                        | Pneumonia due to Klebsiella pneumoniae                         |                                             |                     |
| J15.1                                        | Pneumonia due to Pseudomonas                                   |                                             |                     |
| J15.20                                       | Pneumonia due to staphylococcus, unspecified                   |                                             |                     |
| J15.211                                      | Pneumonia due to Methicillin susceptible Staphylococcus aureus |                                             |                     |
| J15.212                                      | Pneumonia due to Methicillin resistant Staphylococcus aureus   |                                             |                     |
| J15.29                                       | Pneumonia due to other staphylococcus                          |                                             |                     |
| J15.3                                        | Pneumonia due to streptococcus, group B                        |                                             |                     |
| J15.4                                        | Pneumonia due to other streptococci                            |                                             |                     |
| J15.5                                        | Pneumonia due to Escherichia coli                              |                                             |                     |
| J15.6                                        | Pneumonia due to other aerobic Gram-negative bacteria          |                                             |                     |
| J15.7                                        | Pneumonia due to Mycoplasma pneumoniae                         |                                             |                     |
| J15.8                                        | Pneumonia due to other specified bacteria                      |                                             |                     |
| J15.9                                        | Unspecified bacterial pneumonia                                |                                             |                     |

|       |                                                       |  |  |
|-------|-------------------------------------------------------|--|--|
| J16.0 | Chlamydial pneumonia                                  |  |  |
| J16.8 | Pneumonia due to other specified infectious organisms |  |  |
| J17.  | Pneumonia in diseases classified elsewhere            |  |  |
| J18.0 | Bronchopneumonia, unspecified organism                |  |  |
| J18.1 | Lobar pneumonia, unspecified organism                 |  |  |
| J18.2 | Hypostatic pneumonia, unspecified organism            |  |  |
| J18.8 | Other pneumonia, unspecified organism                 |  |  |
| J18.9 | Pneumonia, unspecified organism                       |  |  |

### Included and Excluded ICD-10-CM Diagnosis Subcodes for Pneumothorax Condition Group

| Included ICD-10-CM diagnosis subcodes (n=5) |                                    | Excluded ICD-10-CM diagnosis subcodes (n=2) |                      |
|---------------------------------------------|------------------------------------|---------------------------------------------|----------------------|
| Subcode                                     | Subcode description                | Subcode                                     | Subcode description  |
| J93.0                                       | Spontaneous tension pneumothorax   | J93.81                                      | Chronic pneumothorax |
| J93.11                                      | Primary spontaneous pneumothorax   | J93.82                                      | Other air leak       |
| J93.12                                      | Secondary spontaneous pneumothorax |                                             |                      |
| J93.83                                      | Other pneumothorax                 |                                             |                      |
| J93.9                                       | Pneumothorax, unspecified          |                                             |                      |

### Included and Excluded ICD-10-CM Diagnosis Subcodes for Postpartum Hemorrhage Condition Group

| Included ICD-10-CM diagnosis subcodes (n=4) |                                             | Excluded ICD-10-CM diagnosis subcodes (n=0) |                     |
|---------------------------------------------|---------------------------------------------|---------------------------------------------|---------------------|
| Subcode                                     | Subcode description                         | Subcode                                     | Subcode description |
| O72.0                                       | Third-stage hemorrhage                      |                                             |                     |
| O72.1                                       | Other immediate postpartum hemorrhage       |                                             |                     |
| O72.2                                       | Delayed and secondary postpartum hemorrhage |                                             |                     |
| O72.3                                       | Postpartum coagulation defects              |                                             |                     |

### Included and Excluded ICD-10-CM Diagnosis Subcodes for Pre-eclampsia/Eclampsia Condition Group

| Included ICD-10-CM diagnosis subcodes (n=18) |                                                       | Excluded ICD-10-CM diagnosis subcodes (n=0) |                     |
|----------------------------------------------|-------------------------------------------------------|---------------------------------------------|---------------------|
| Subcode                                      | Subcode description                                   | Subcode                                     | Subcode description |
| O14.00                                       | Mild to moderate pre-eclampsia, unspecified trimester |                                             |                     |
| O14.02                                       | Mild to moderate pre-eclampsia, second trimester      |                                             |                     |
| O14.03                                       | Mild to moderate pre-eclampsia, third trimester       |                                             |                     |
| O14.10                                       | Severe pre-eclampsia, unspecified trimester           |                                             |                     |
| O14.12                                       | Severe pre-eclampsia, second trimester                |                                             |                     |
| O14.13                                       | Severe pre-eclampsia, third trimester                 |                                             |                     |
| O14.20                                       | HELLP syndrome (HELLP), unspecified trimester         |                                             |                     |
| O14.22                                       | HELLP syndrome (HELLP), second trimester              |                                             |                     |
| O14.23                                       | HELLP syndrome (HELLP), third trimester               |                                             |                     |
| O14.90                                       | Unspecified pre-eclampsia, unspecified trimester      |                                             |                     |
| O14.92                                       | Unspecified pre-eclampsia, second trimester           |                                             |                     |
| O14.93                                       | Unspecified pre-eclampsia, third trimester            |                                             |                     |
| O15.00                                       | Eclampsia in pregnancy, unspecified trimester         |                                             |                     |
| O15.02                                       | Eclampsia in pregnancy, second trimester              |                                             |                     |
| O15.03                                       | Eclampsia in pregnancy, third trimester               |                                             |                     |
| O15.1                                        | Eclampsia in labor                                    |                                             |                     |
| O15.2                                        | Eclampsia in the puerperium                           |                                             |                     |
| O15.9                                        | Eclampsia, unspecified as to time period              |                                             |                     |

### Included and Excluded ICD-10-CM Diagnosis Subcodes for Pulmonary Embolism Condition Group

| Included ICD-10-CM diagnosis subcodes (n=6) |                                                                | Excluded ICD-10-CM diagnosis subcodes (n=0) |                     |
|---------------------------------------------|----------------------------------------------------------------|---------------------------------------------|---------------------|
| Subcode                                     | Subcode description                                            | Subcode                                     | Subcode description |
| I26.01                                      | Septic pulmonary embolism with acute cor pulmonale             |                                             |                     |
| I26.02                                      | Saddle embolus of pulmonary artery with acute cor pulmonale    |                                             |                     |
| I26.09                                      | Other pulmonary embolism with acute cor pulmonale              |                                             |                     |
| I26.90                                      | Septic pulmonary embolism without acute cor pulmonale          |                                             |                     |
| I26.92                                      | Saddle embolus of pulmonary artery without acute cor pulmonale |                                             |                     |
| I26.99                                      | Other pulmonary embolism without acute cor pulmonale           |                                             |                     |

### Included and Excluded ICD-10-CM Diagnosis Subcodes for Respiratory Failure Condition Group

| Included ICD-10-CM diagnosis subcodes (n=12) |                                                                                        | Excluded ICD-10-CM diagnosis subcodes (n=0) |                     |
|----------------------------------------------|----------------------------------------------------------------------------------------|---------------------------------------------|---------------------|
| Subcode                                      | Subcode description                                                                    | Subcode                                     | Subcode description |
| J96.00                                       | Acute respiratory failure, unspecified whether with hypoxia or hypercapnia             |                                             |                     |
| J96.01                                       | Acute respiratory failure with hypoxia                                                 |                                             |                     |
| J96.02                                       | Acute respiratory failure with hypercapnia                                             |                                             |                     |
| J96.10                                       | Chronic respiratory failure, unspecified whether with hypoxia or hypercapnia           |                                             |                     |
| J96.11                                       | Chronic respiratory failure with hypoxia                                               |                                             |                     |
| J96.12                                       | Chronic respiratory failure with hypercapnia                                           |                                             |                     |
| J96.20                                       | Acute and chronic respiratory failure, unspecified whether with hypoxia or hypercapnia |                                             |                     |
| J96.21                                       | Acute and chronic respiratory failure with hypoxia                                     |                                             |                     |
| J96.22                                       | Acute and chronic respiratory failure with hypercapnia                                 |                                             |                     |
| J96.90                                       | Respiratory failure, unspecified, unspecified whether with hypoxia or hypercapnia      |                                             |                     |
| J96.91                                       | Respiratory failure, unspecified with hypoxia                                          |                                             |                     |
| J96.92                                       | Respiratory failure, unspecified with hypercapnia                                      |                                             |                     |



## Included and Excluded ICD-10-CM Diagnosis Subcodes for Sepsis and Systemic Inflammatory Response Syndrome Condition Group

| Included ICD-10-CM diagnosis subcodes (n=35) |                                                             | Excluded ICD-10-CM diagnosis subcodes (n=5) |                                      |
|----------------------------------------------|-------------------------------------------------------------|---------------------------------------------|--------------------------------------|
| Subcode                                      | Subcode description                                         | Subcode                                     | Subcode description                  |
| A02.1                                        | Salmonella sepsis                                           | A39.3                                       | Chronic meningococemia               |
| A20.7                                        | Septicemic plague                                           | A39.82                                      | Meningococcal retrobulbar neuritis   |
| A22.7                                        | Anthrax sepsis                                              | A39.84                                      | Postmeningococcal arthritis          |
| A26.7                                        | Erysipelothrix sepsis                                       | A39.89                                      | Other meningococcal infections       |
| A32.7                                        | Listerial sepsis                                            | A39.9                                       | Meningococcal infection, unspecified |
| A39.1                                        | Waterhouse-Friderichsen syndrome                            |                                             |                                      |
| A39.2                                        | Acute meningococemia                                        |                                             |                                      |
| A39.4                                        | Meningococemia, unspecified                                 |                                             |                                      |
| A40.0                                        | Sepsis due to streptococcus, group A                        |                                             |                                      |
| A40.1                                        | Sepsis due to streptococcus, group B                        |                                             |                                      |
| A40.3                                        | Sepsis due to Streptococcus pneumoniae                      |                                             |                                      |
| A40.8                                        | Other streptococcal sepsis                                  |                                             |                                      |
| A40.9                                        | Streptococcal sepsis, unspecified                           |                                             |                                      |
| A41.01                                       | Sepsis due to Methicillin susceptible Staphylococcus aureus |                                             |                                      |
| A41.02                                       | Sepsis due to Methicillin resistant Staphylococcus aureus   |                                             |                                      |
| A41.1                                        | Sepsis due to other specified staphylococcus                |                                             |                                      |
| A41.2                                        | Sepsis due to unspecified staphylococcus                    |                                             |                                      |
| A41.3                                        | Sepsis due to Hemophilus influenzae                         |                                             |                                      |
| A41.4                                        | Sepsis due to anaerobes                                     |                                             |                                      |
| A41.50                                       | Gram-negative sepsis, unspecified                           |                                             |                                      |
| A41.51                                       | Sepsis due to Escherichia coli [E. coli]                    |                                             |                                      |
| A41.52                                       | Sepsis due to Pseudomonas                                   |                                             |                                      |
| A41.53                                       | Sepsis due to Serratia                                      |                                             |                                      |
| A41.59                                       | Other Gram-negative sepsis                                  |                                             |                                      |
| A41.81                                       | Sepsis due to Enterococcus                                  |                                             |                                      |
| A41.89                                       | Other specified sepsis                                      |                                             |                                      |
| A41.9                                        | Sepsis, unspecified organism                                |                                             |                                      |
| A42.7                                        | Actinomycotic sepsis                                        |                                             |                                      |

|        |                                                                                                         |  |  |
|--------|---------------------------------------------------------------------------------------------------------|--|--|
| A54.86 | Gonococcal sepsis                                                                                       |  |  |
| B37.7  | Candidal sepsis                                                                                         |  |  |
| R65.10 | Systemic inflammatory response syndrome (SIRS) of non-infectious origin without acute organ dysfunction |  |  |
| R65.11 | Systemic inflammatory response syndrome (SIRS) of non-infectious origin with acute organ dysfunction    |  |  |
| R65.20 | Severe sepsis without septic shock                                                                      |  |  |
| R65.21 | Severe sepsis with septic shock                                                                         |  |  |
| R78.81 | Bacteremia                                                                                              |  |  |

### Included and Excluded ICD-10-CM Diagnosis Subcodes for Septic Arthritis Condition Group

| Included ICD-10-CM diagnosis subcodes (n=122) |                                                      | Excluded ICD-10-CM diagnosis subcodes (n=0) |                     |
|-----------------------------------------------|------------------------------------------------------|---------------------------------------------|---------------------|
| Subcode                                       | Subcode description                                  | Subcode                                     | Subcode description |
| A39.83                                        | Meningococcal arthritis                              |                                             |                     |
| M00.00                                        | Staphylococcal arthritis, unspecified joint          |                                             |                     |
| M00.011                                       | Staphylococcal arthritis, right shoulder             |                                             |                     |
| M00.012                                       | Staphylococcal arthritis, left shoulder              |                                             |                     |
| M00.019                                       | Staphylococcal arthritis, unspecified shoulder       |                                             |                     |
| M00.021                                       | Staphylococcal arthritis, right elbow                |                                             |                     |
| M00.022                                       | Staphylococcal arthritis, left elbow                 |                                             |                     |
| M00.029                                       | Staphylococcal arthritis, unspecified elbow          |                                             |                     |
| M00.031                                       | Staphylococcal arthritis, right wrist                |                                             |                     |
| M00.032                                       | Staphylococcal arthritis, left wrist                 |                                             |                     |
| M00.039                                       | Staphylococcal arthritis, unspecified wrist          |                                             |                     |
| M00.041                                       | Staphylococcal arthritis, right hand                 |                                             |                     |
| M00.042                                       | Staphylococcal arthritis, left hand                  |                                             |                     |
| M00.049                                       | Staphylococcal arthritis, unspecified hand           |                                             |                     |
| M00.051                                       | Staphylococcal arthritis, right hip                  |                                             |                     |
| M00.052                                       | Staphylococcal arthritis, left hip                   |                                             |                     |
| M00.059                                       | Staphylococcal arthritis, unspecified hip            |                                             |                     |
| M00.061                                       | Staphylococcal arthritis, right knee                 |                                             |                     |
| M00.062                                       | Staphylococcal arthritis, left knee                  |                                             |                     |
| M00.069                                       | Staphylococcal arthritis, unspecified knee           |                                             |                     |
| M00.071                                       | Staphylococcal arthritis, right ankle and foot       |                                             |                     |
| M00.072                                       | Staphylococcal arthritis, left ankle and foot        |                                             |                     |
| M00.079                                       | Staphylococcal arthritis, unspecified ankle and foot |                                             |                     |
| M00.08                                        | Staphylococcal arthritis, vertebrae                  |                                             |                     |
| M00.09                                        | Staphylococcal polyarthritis                         |                                             |                     |
| M00.10                                        | Pneumococcal arthritis, unspecified joint            |                                             |                     |
| M00.111                                       | Pneumococcal arthritis, right shoulder               |                                             |                     |
| M00.112                                       | Pneumococcal arthritis, left shoulder                |                                             |                     |
| M00.119                                       | Pneumococcal arthritis, unspecified shoulder         |                                             |                     |
| M00.121                                       | Pneumococcal arthritis, right elbow                  |                                             |                     |

|         |                                                     |  |  |
|---------|-----------------------------------------------------|--|--|
| M00.122 | Pneumococcal arthritis, left elbow                  |  |  |
| M00.129 | Pneumococcal arthritis, unspecified elbow           |  |  |
| M00.131 | Pneumococcal arthritis, right wrist                 |  |  |
| M00.132 | Pneumococcal arthritis, left wrist                  |  |  |
| M00.139 | Pneumococcal arthritis, unspecified wrist           |  |  |
| M00.141 | Pneumococcal arthritis, right hand                  |  |  |
| M00.142 | Pneumococcal arthritis, left hand                   |  |  |
| M00.149 | Pneumococcal arthritis, unspecified hand            |  |  |
| M00.151 | Pneumococcal arthritis, right hip                   |  |  |
| M00.152 | Pneumococcal arthritis, left hip                    |  |  |
| M00.159 | Pneumococcal arthritis, unspecified hip             |  |  |
| M00.161 | Pneumococcal arthritis, right knee                  |  |  |
| M00.162 | Pneumococcal arthritis, left knee                   |  |  |
| M00.169 | Pneumococcal arthritis, unspecified knee            |  |  |
| M00.171 | Pneumococcal arthritis, right ankle and foot        |  |  |
| M00.172 | Pneumococcal arthritis, left ankle and foot         |  |  |
| M00.179 | Pneumococcal arthritis, unspecified ankle and foot  |  |  |
| M00.18  | Pneumococcal arthritis, vertebrae                   |  |  |
| M00.19  | Pneumococcal polyarthritis                          |  |  |
| M00.20  | Other streptococcal arthritis, unspecified joint    |  |  |
| M00.211 | Other streptococcal arthritis, right shoulder       |  |  |
| M00.212 | Other streptococcal arthritis, left shoulder        |  |  |
| M00.219 | Other streptococcal arthritis, unspecified shoulder |  |  |
| M00.221 | Other streptococcal arthritis, right elbow          |  |  |
| M00.222 | Other streptococcal arthritis, left elbow           |  |  |
| M00.229 | Other streptococcal arthritis, unspecified elbow    |  |  |
| M00.231 | Other streptococcal arthritis, right wrist          |  |  |
| M00.232 | Other streptococcal arthritis, left wrist           |  |  |
| M00.239 | Other streptococcal arthritis, unspecified wrist    |  |  |
| M00.241 | Other streptococcal arthritis, right hand           |  |  |
| M00.242 | Other streptococcal arthritis, left hand            |  |  |
| M00.249 | Other streptococcal arthritis, unspecified hand     |  |  |
| M00.251 | Other streptococcal arthritis, right hip            |  |  |
| M00.252 | Other streptococcal arthritis, left hip             |  |  |

|         |                                                             |  |  |
|---------|-------------------------------------------------------------|--|--|
| M00.259 | Other streptococcal arthritis, unspecified hip              |  |  |
| M00.261 | Other streptococcal arthritis, right knee                   |  |  |
| M00.262 | Other streptococcal arthritis, left knee                    |  |  |
| M00.269 | Other streptococcal arthritis, unspecified knee             |  |  |
| M00.271 | Other streptococcal arthritis, right ankle and foot         |  |  |
| M00.272 | Other streptococcal arthritis, left ankle and foot          |  |  |
| M00.279 | Other streptococcal arthritis, unspecified ankle and foot   |  |  |
| M00.28  | Other streptococcal arthritis, vertebrae                    |  |  |
| M00.29  | Other streptococcal polyarthritis                           |  |  |
| M00.80  | Arthritis due to other bacteria, unspecified joint          |  |  |
| M00.811 | Arthritis due to other bacteria, right shoulder             |  |  |
| M00.812 | Arthritis due to other bacteria, left shoulder              |  |  |
| M00.819 | Arthritis due to other bacteria, unspecified shoulder       |  |  |
| M00.821 | Arthritis due to other bacteria, right elbow                |  |  |
| M00.822 | Arthritis due to other bacteria, left elbow                 |  |  |
| M00.829 | Arthritis due to other bacteria, unspecified elbow          |  |  |
| M00.831 | Arthritis due to other bacteria, right wrist                |  |  |
| M00.832 | Arthritis due to other bacteria, left wrist                 |  |  |
| M00.839 | Arthritis due to other bacteria, unspecified wrist          |  |  |
| M00.841 | Arthritis due to other bacteria, right hand                 |  |  |
| M00.842 | Arthritis due to other bacteria, left hand                  |  |  |
| M00.849 | Arthritis due to other bacteria, unspecified hand           |  |  |
| M00.851 | Arthritis due to other bacteria, right hip                  |  |  |
| M00.852 | Arthritis due to other bacteria, left hip                   |  |  |
| M00.859 | Arthritis due to other bacteria, unspecified hip            |  |  |
| M00.861 | Arthritis due to other bacteria, right knee                 |  |  |
| M00.862 | Arthritis due to other bacteria, left knee                  |  |  |
| M00.869 | Arthritis due to other bacteria, unspecified knee           |  |  |
| M00.871 | Arthritis due to other bacteria, right ankle and foot       |  |  |
| M00.872 | Arthritis due to other bacteria, left ankle and foot        |  |  |
| M00.879 | Arthritis due to other bacteria, unspecified ankle and foot |  |  |
| M00.88  | Arthritis due to other bacteria, vertebrae                  |  |  |
| M00.89  | Polyarthritis due to other bacteria                         |  |  |
| M00.9   | Pyogenic arthritis, unspecified                             |  |  |

|         |                                                                                                    |  |  |
|---------|----------------------------------------------------------------------------------------------------|--|--|
| M01.X0  | Direct infection of unspecified joint in infectious and parasitic diseases classified elsewhere    |  |  |
| M01.X11 | Direct infection of right shoulder in infectious and parasitic diseases classified elsewhere       |  |  |
| M01.X12 | Direct infection of left shoulder in infectious and parasitic diseases classified elsewhere        |  |  |
| M01.X19 | Direct infection of unspecified shoulder in infectious and parasitic diseases classified elsewhere |  |  |
| M01.X21 | Direct infection of right elbow in infectious and parasitic diseases classified elsewhere          |  |  |
| M01.X22 | Direct infection of left elbow in infectious and parasitic diseases classified elsewhere           |  |  |
| M01.X29 | Direct infection of unspecified elbow in infectious and parasitic diseases classified elsewhere    |  |  |
| M01.X31 | Direct infection of right wrist in infectious and parasitic diseases classified elsewhere          |  |  |
| M01.X32 | Direct infection of left wrist in infectious and parasitic diseases classified elsewhere           |  |  |
| M01.X39 | Direct infection of unspecified wrist in infectious and parasitic diseases classified elsewhere    |  |  |
| M01.X41 | Direct infection of right hand in infectious and parasitic diseases classified elsewhere           |  |  |
| M01.X42 | Direct infection of left hand in infectious and parasitic diseases classified elsewhere            |  |  |
| M01.X49 | Direct infection of unspecified hand in infectious and parasitic diseases classified elsewhere     |  |  |
| M01.X51 | Direct infection of right hip in infectious and parasitic diseases classified elsewhere            |  |  |
| M01.X52 | Direct infection of left hip in infectious and parasitic diseases classified elsewhere             |  |  |
| M01.X59 | Direct infection of unspecified hip in infectious and parasitic diseases classified elsewhere      |  |  |
| M01.X61 | Direct infection of right knee in infectious and parasitic diseases classified elsewhere           |  |  |
| M01.X62 | Direct infection of left knee in infectious and parasitic diseases classified elsewhere            |  |  |
| M01.X69 | Direct infection of unspecified knee in infectious and parasitic diseases classified elsewhere     |  |  |

|         |                                                                                                          |  |  |
|---------|----------------------------------------------------------------------------------------------------------|--|--|
| M01.X71 | Direct infection of right ankle and foot in infectious and parasitic diseases classified elsewhere       |  |  |
| M01.X72 | Direct infection of left ankle and foot in infectious and parasitic diseases classified elsewhere        |  |  |
| M01.X79 | Direct infection of unspecified ankle and foot in infectious and parasitic diseases classified elsewhere |  |  |
| M01.X8  | Direct infection of vertebrae in infectious and parasitic diseases classified elsewhere                  |  |  |
| M01.X9  | Direct infection of multiple joints in infectious and parasitic diseases classified elsewhere            |  |  |

### Included and Excluded ICD-10-CM Diagnosis Subcodes for Shock Condition Group

| Included ICD-10-CM diagnosis subcodes (n=4) |                     | Excluded ICD-10-CM diagnosis subcodes (n=0) |                     |
|---------------------------------------------|---------------------|---------------------------------------------|---------------------|
| Subcode                                     | Subcode description | Subcode                                     | Subcode description |
| R57.0                                       | Cardiogenic shock   |                                             |                     |
| R57.1                                       | Hypovolemic shock   |                                             |                     |
| R57.8                                       | Other shock         |                                             |                     |
| R57.9                                       | Shock, unspecified  |                                             |                     |

## Included and Excluded ICD-10-CM Diagnosis Subcodes for Thoracic Injuries Condition Group

| Included ICD-10-CM diagnosis subcodes (n=391) |                                                                              | Excluded ICD-10-CM diagnosis subcodes (n=9) |                                                                              |
|-----------------------------------------------|------------------------------------------------------------------------------|---------------------------------------------|------------------------------------------------------------------------------|
| Subcode                                       | Subcode description                                                          | Subcode                                     | Subcode description                                                          |
| S21.001A                                      | Unspecified open wound of right breast, initial encounter                    | S22.31XA                                    | Fracture of one rib, right side, initial encounter for closed fracture       |
| S21.002A                                      | Unspecified open wound of left breast, initial encounter                     | S22.31XB                                    | Fracture of one rib, right side, initial encounter for open fracture         |
| S21.009A                                      | Unspecified open wound of unspecified breast, initial encounter              | S22.32XA                                    | Fracture of one rib, left side, initial encounter for closed fracture        |
| S21.011A                                      | Laceration without foreign body of right breast, initial encounter           | S22.32XB                                    | Fracture of one rib, left side, initial encounter for open fracture          |
| S21.012A                                      | Laceration without foreign body of left breast, initial encounter            | S22.39XA                                    | Fracture of one rib, unspecified side, initial encounter for closed fracture |
| S21.019A                                      | Laceration without foreign body of unspecified breast, initial encounter     | S22.39XB                                    | Fracture of one rib, unspecified side, initial encounter for open fracture   |
| S21.021A                                      | Laceration with foreign body of right breast, initial encounter              | S29.011A                                    | Strain of muscle and tendon of front wall of thorax, initial encounter       |
| S21.022A                                      | Laceration with foreign body of left breast, initial encounter               | S29.012A                                    | Strain of muscle and tendon of back wall of thorax, initial encounter        |
| S21.029A                                      | Laceration with foreign body of unspecified breast, initial encounter        | S29.019A                                    | Strain of muscle and tendon of unspecified wall of thorax, initial encounter |
| S21.031A                                      | Puncture wound without foreign body of right breast, initial encounter       |                                             |                                                                              |
| S21.032A                                      | Puncture wound without foreign body of left breast, initial encounter        |                                             |                                                                              |
| S21.039A                                      | Puncture wound without foreign body of unspecified breast, initial encounter |                                             |                                                                              |
| S21.041A                                      | Puncture wound with foreign body of right breast, initial encounter          |                                             |                                                                              |
| S21.042A                                      | Puncture wound with foreign body of left breast, initial encounter           |                                             |                                                                              |
| S21.049A                                      | Puncture wound with foreign body of unspecified breast, initial encounter    |                                             |                                                                              |
| S21.051A                                      | Open bite of right breast, initial encounter                                 |                                             |                                                                              |
| S21.052A                                      | Open bite of left breast, initial encounter                                  |                                             |                                                                              |
| S21.059A                                      | Open bite of unspecified breast, initial encounter                           |                                             |                                                                              |



|          |                                                                                                                                     |  |  |
|----------|-------------------------------------------------------------------------------------------------------------------------------------|--|--|
| S21.101A | Unspecified open wound of right front wall of thorax without penetration into thoracic cavity, initial encounter                    |  |  |
| S21.102A | Unspecified open wound of left front wall of thorax without penetration into thoracic cavity, initial encounter                     |  |  |
| S21.109A | Unspecified open wound of unspecified front wall of thorax without penetration into thoracic cavity, initial encounter              |  |  |
| S21.111A | Laceration without foreign body of right front wall of thorax without penetration into thoracic cavity, initial encounter           |  |  |
| S21.112A | Laceration without foreign body of left front wall of thorax without penetration into thoracic cavity, initial encounter            |  |  |
| S21.119A | Laceration without foreign body of unspecified front wall of thorax without penetration into thoracic cavity, initial encounter     |  |  |
| S21.121A | Laceration with foreign body of right front wall of thorax without penetration into thoracic cavity, initial encounter              |  |  |
| S21.122A | Laceration with foreign body of left front wall of thorax without penetration into thoracic cavity, initial encounter               |  |  |
| S21.129A | Laceration with foreign body of unspecified front wall of thorax without penetration into thoracic cavity, initial encounter        |  |  |
| S21.131A | Puncture wound without foreign body of right front wall of thorax without penetration into thoracic cavity, initial encounter       |  |  |
| S21.132A | Puncture wound without foreign body of left front wall of thorax without penetration into thoracic cavity, initial encounter        |  |  |
| S21.139A | Puncture wound without foreign body of unspecified front wall of thorax without penetration into thoracic cavity, initial encounter |  |  |
| S21.141A | Puncture wound with foreign body of right front wall of thorax without penetration into thoracic cavity, initial encounter          |  |  |
| S21.142A | Puncture wound with foreign body of left front wall of thorax without penetration into thoracic cavity, initial encounter           |  |  |
| S21.149A | Puncture wound with foreign body of unspecified front wall of thorax without penetration into thoracic cavity, initial encounter    |  |  |

|          |                                                                                                                                    |  |  |
|----------|------------------------------------------------------------------------------------------------------------------------------------|--|--|
| S21.151A | Open bite of right front wall of thorax without penetration into thoracic cavity, initial encounter                                |  |  |
| S21.152A | Open bite of left front wall of thorax without penetration into thoracic cavity, initial encounter                                 |  |  |
| S21.159A | Open bite of unspecified front wall of thorax without penetration into thoracic cavity, initial encounter                          |  |  |
| S21.201A | Unspecified open wound of right back wall of thorax without penetration into thoracic cavity, initial encounter                    |  |  |
| S21.202A | Unspecified open wound of left back wall of thorax without penetration into thoracic cavity, initial encounter                     |  |  |
| S21.209A | Unspecified open wound of unspecified back wall of thorax without penetration into thoracic cavity, initial encounter              |  |  |
| S21.211A | Laceration without foreign body of right back wall of thorax without penetration into thoracic cavity, initial encounter           |  |  |
| S21.212A | Laceration without foreign body of left back wall of thorax without penetration into thoracic cavity, initial encounter            |  |  |
| S21.219A | Laceration without foreign body of unspecified back wall of thorax without penetration into thoracic cavity, initial encounter     |  |  |
| S21.221A | Laceration with foreign body of right back wall of thorax without penetration into thoracic cavity, initial encounter              |  |  |
| S21.222A | Laceration with foreign body of left back wall of thorax without penetration into thoracic cavity, initial encounter               |  |  |
| S21.229A | Laceration with foreign body of unspecified back wall of thorax without penetration into thoracic cavity, initial encounter        |  |  |
| S21.231A | Puncture wound without foreign body of right back wall of thorax without penetration into thoracic cavity, initial encounter       |  |  |
| S21.232A | Puncture wound without foreign body of left back wall of thorax without penetration into thoracic cavity, initial encounter        |  |  |
| S21.239A | Puncture wound without foreign body of unspecified back wall of thorax without penetration into thoracic cavity, initial encounter |  |  |

|          |                                                                                                                                 |  |  |
|----------|---------------------------------------------------------------------------------------------------------------------------------|--|--|
| S21.241A | Puncture wound with foreign body of right back wall of thorax without penetration into thoracic cavity, initial encounter       |  |  |
| S21.242A | Puncture wound with foreign body of left back wall of thorax without penetration into thoracic cavity, initial encounter        |  |  |
| S21.249A | Puncture wound with foreign body of unspecified back wall of thorax without penetration into thoracic cavity, initial encounter |  |  |
| S21.251A | Open bite of right back wall of thorax without penetration into thoracic cavity, initial encounter                              |  |  |
| S21.252A | Open bite of left back wall of thorax without penetration into thoracic cavity, initial encounter                               |  |  |
| S21.259A | Open bite of unspecified back wall of thorax without penetration into thoracic cavity, initial encounter                        |  |  |
| S21.301A | Unspecified open wound of right front wall of thorax with penetration into thoracic cavity, initial encounter                   |  |  |
| S21.302A | Unspecified open wound of left front wall of thorax with penetration into thoracic cavity, initial encounter                    |  |  |
| S21.309A | Unspecified open wound of unspecified front wall of thorax with penetration into thoracic cavity, initial encounter             |  |  |
| S21.311A | Laceration without foreign body of right front wall of thorax with penetration into thoracic cavity, initial encounter          |  |  |
| S21.312A | Laceration without foreign body of left front wall of thorax with penetration into thoracic cavity, initial encounter           |  |  |
| S21.319A | Laceration without foreign body of unspecified front wall of thorax with penetration into thoracic cavity, initial encounter    |  |  |
| S21.321A | Laceration with foreign body of right front wall of thorax with penetration into thoracic cavity, initial encounter             |  |  |
| S21.322A | Laceration with foreign body of left front wall of thorax with penetration into thoracic cavity, initial encounter              |  |  |
| S21.329A | Laceration with foreign body of unspecified front wall of thorax with penetration into thoracic cavity, initial encounter       |  |  |

|          |                                                                                                                                  |  |  |
|----------|----------------------------------------------------------------------------------------------------------------------------------|--|--|
| S21.331A | Puncture wound without foreign body of right front wall of thorax with penetration into thoracic cavity, initial encounter       |  |  |
| S21.332A | Puncture wound without foreign body of left front wall of thorax with penetration into thoracic cavity, initial encounter        |  |  |
| S21.339A | Puncture wound without foreign body of unspecified front wall of thorax with penetration into thoracic cavity, initial encounter |  |  |
| S21.341A | Puncture wound with foreign body of right front wall of thorax with penetration into thoracic cavity, initial encounter          |  |  |
| S21.342A | Puncture wound with foreign body of left front wall of thorax with penetration into thoracic cavity, initial encounter           |  |  |
| S21.349A | Puncture wound with foreign body of unspecified front wall of thorax with penetration into thoracic cavity, initial encounter    |  |  |
| S21.351A | Open bite of right front wall of thorax with penetration into thoracic cavity, initial encounter                                 |  |  |
| S21.352A | Open bite of left front wall of thorax with penetration into thoracic cavity, initial encounter                                  |  |  |
| S21.359A | Open bite of unspecified front wall of thorax with penetration into thoracic cavity, initial encounter                           |  |  |
| S21.401A | Unspecified open wound of right back wall of thorax with penetration into thoracic cavity, initial encounter                     |  |  |
| S21.402A | Unspecified open wound of left back wall of thorax with penetration into thoracic cavity, initial encounter                      |  |  |
| S21.409A | Unspecified open wound of unspecified back wall of thorax with penetration into thoracic cavity, initial encounter               |  |  |
| S21.411A | Laceration without foreign body of right back wall of thorax with penetration into thoracic cavity, initial encounter            |  |  |
| S21.412A | Laceration without foreign body of left back wall of thorax with penetration into thoracic cavity, initial encounter             |  |  |
| S21.419A | Laceration without foreign body of unspecified back wall of thorax with penetration into thoracic cavity, initial encounter      |  |  |

|          |                                                                                                                                 |  |  |
|----------|---------------------------------------------------------------------------------------------------------------------------------|--|--|
| S21.421A | Laceration with foreign body of right back wall of thorax with penetration into thoracic cavity, initial encounter              |  |  |
| S21.422A | Laceration with foreign body of left back wall of thorax with penetration into thoracic cavity, initial encounter               |  |  |
| S21.429A | Laceration with foreign body of unspecified back wall of thorax with penetration into thoracic cavity, initial encounter        |  |  |
| S21.431A | Puncture wound without foreign body of right back wall of thorax with penetration into thoracic cavity, initial encounter       |  |  |
| S21.432A | Puncture wound without foreign body of left back wall of thorax with penetration into thoracic cavity, initial encounter        |  |  |
| S21.439A | Puncture wound without foreign body of unspecified back wall of thorax with penetration into thoracic cavity, initial encounter |  |  |
| S21.441A | Puncture wound with foreign body of right back wall of thorax with penetration into thoracic cavity, initial encounter          |  |  |
| S21.442A | Puncture wound with foreign body of left back wall of thorax with penetration into thoracic cavity, initial encounter           |  |  |
| S21.449A | Puncture wound with foreign body of unspecified back wall of thorax with penetration into thoracic cavity, initial encounter    |  |  |
| S21.451A | Open bite of right back wall of thorax with penetration into thoracic cavity, initial encounter                                 |  |  |
| S21.452A | Open bite of left back wall of thorax with penetration into thoracic cavity, initial encounter                                  |  |  |
| S21.459A | Open bite of unspecified back wall of thorax with penetration into thoracic cavity, initial encounter                           |  |  |
| S21.90XA | Unspecified open wound of unspecified part of thorax, initial encounter                                                         |  |  |
| S21.91XA | Laceration without foreign body of unspecified part of thorax, initial encounter                                                |  |  |
| S21.92XA | Laceration with foreign body of unspecified part of thorax, initial encounter                                                   |  |  |
| S21.93XA | Puncture wound without foreign body of unspecified part of thorax, initial encounter                                            |  |  |

|          |                                                                                                    |  |  |
|----------|----------------------------------------------------------------------------------------------------|--|--|
| S21.94XA | Puncture wound with foreign body of unspecified part of thorax, initial encounter                  |  |  |
| S21.95XA | Open bite of unspecified part of thorax, initial encounter                                         |  |  |
| S22.000A | Wedge compression fracture of unspecified thoracic vertebra, initial encounter for closed fracture |  |  |
| S22.000B | Wedge compression fracture of unspecified thoracic vertebra, initial encounter for open fracture   |  |  |
| S22.001A | Stable burst fracture of unspecified thoracic vertebra, initial encounter for closed fracture      |  |  |
| S22.001B | Stable burst fracture of unspecified thoracic vertebra, initial encounter for open fracture        |  |  |
| S22.002A | Unstable burst fracture of unspecified thoracic vertebra, initial encounter for closed fracture    |  |  |
| S22.002B | Unstable burst fracture of unspecified thoracic vertebra, initial encounter for open fracture      |  |  |
| S22.008A | Other fracture of unspecified thoracic vertebra, initial encounter for closed fracture             |  |  |
| S22.008B | Other fracture of unspecified thoracic vertebra, initial encounter for open fracture               |  |  |
| S22.009A | Unspecified fracture of unspecified thoracic vertebra, initial encounter for closed fracture       |  |  |
| S22.009B | Unspecified fracture of unspecified thoracic vertebra, initial encounter for open fracture         |  |  |
| S22.010A | Wedge compression fracture of first thoracic vertebra, initial encounter for closed fracture       |  |  |
| S22.010B | Wedge compression fracture of first thoracic vertebra, initial encounter for open fracture         |  |  |
| S22.011A | Stable burst fracture of first thoracic vertebra, initial encounter for closed fracture            |  |  |
| S22.011B | Stable burst fracture of first thoracic vertebra, initial encounter for open fracture              |  |  |
| S22.012A | Unstable burst fracture of first thoracic vertebra, initial encounter for closed fracture          |  |  |
| S22.012B | Unstable burst fracture of first thoracic vertebra, initial encounter for open fracture            |  |  |
| S22.018A | Other fracture of first thoracic vertebra, initial encounter for closed fracture                   |  |  |
| S22.018B | Other fracture of first thoracic vertebra, initial encounter for open fracture                     |  |  |

|          |                                                                                               |  |  |
|----------|-----------------------------------------------------------------------------------------------|--|--|
| S22.019A | Unspecified fracture of first thoracic vertebra, initial encounter for closed fracture        |  |  |
| S22.019B | Unspecified fracture of first thoracic vertebra, initial encounter for open fracture          |  |  |
| S22.020A | Wedge compression fracture of second thoracic vertebra, initial encounter for closed fracture |  |  |
| S22.020B | Wedge compression fracture of second thoracic vertebra, initial encounter for open fracture   |  |  |
| S22.021A | Stable burst fracture of second thoracic vertebra, initial encounter for closed fracture      |  |  |
| S22.021B | Stable burst fracture of second thoracic vertebra, initial encounter for open fracture        |  |  |
| S22.022A | Unstable burst fracture of second thoracic vertebra, initial encounter for closed fracture    |  |  |
| S22.022B | Unstable burst fracture of second thoracic vertebra, initial encounter for open fracture      |  |  |
| S22.028A | Other fracture of second thoracic vertebra, initial encounter for closed fracture             |  |  |
| S22.028B | Other fracture of second thoracic vertebra, initial encounter for open fracture               |  |  |
| S22.029A | Unspecified fracture of second thoracic vertebra, initial encounter for closed fracture       |  |  |
| S22.029B | Unspecified fracture of second thoracic vertebra, initial encounter for open fracture         |  |  |
| S22.030A | Wedge compression fracture of third thoracic vertebra, initial encounter for closed fracture  |  |  |
| S22.030B | Wedge compression fracture of third thoracic vertebra, initial encounter for open fracture    |  |  |
| S22.031A | Stable burst fracture of third thoracic vertebra, initial encounter for closed fracture       |  |  |
| S22.031B | Stable burst fracture of third thoracic vertebra, initial encounter for open fracture         |  |  |
| S22.032A | Unstable burst fracture of third thoracic vertebra, initial encounter for closed fracture     |  |  |
| S22.032B | Unstable burst fracture of third thoracic vertebra, initial encounter for open fracture       |  |  |
| S22.038A | Other fracture of third thoracic vertebra, initial encounter for closed fracture              |  |  |

|          |                                                                                               |  |  |
|----------|-----------------------------------------------------------------------------------------------|--|--|
| S22.038B | Other fracture of third thoracic vertebra, initial encounter for open fracture                |  |  |
| S22.039A | Unspecified fracture of third thoracic vertebra, initial encounter for closed fracture        |  |  |
| S22.039B | Unspecified fracture of third thoracic vertebra, initial encounter for open fracture          |  |  |
| S22.040A | Wedge compression fracture of fourth thoracic vertebra, initial encounter for closed fracture |  |  |
| S22.040B | Wedge compression fracture of fourth thoracic vertebra, initial encounter for open fracture   |  |  |
| S22.041A | Stable burst fracture of fourth thoracic vertebra, initial encounter for closed fracture      |  |  |
| S22.041B | Stable burst fracture of fourth thoracic vertebra, initial encounter for open fracture        |  |  |
| S22.042A | Unstable burst fracture of fourth thoracic vertebra, initial encounter for closed fracture    |  |  |
| S22.042B | Unstable burst fracture of fourth thoracic vertebra, initial encounter for open fracture      |  |  |
| S22.048A | Other fracture of fourth thoracic vertebra, initial encounter for closed fracture             |  |  |
| S22.048B | Other fracture of fourth thoracic vertebra, initial encounter for open fracture               |  |  |
| S22.049A | Unspecified fracture of fourth thoracic vertebra, initial encounter for closed fracture       |  |  |
| S22.049B | Unspecified fracture of fourth thoracic vertebra, initial encounter for open fracture         |  |  |
| S22.050A | Wedge compression fracture of T5-T6 vertebra, initial encounter for closed fracture           |  |  |
| S22.050B | Wedge compression fracture of T5-T6 vertebra, initial encounter for open fracture             |  |  |
| S22.051A | Stable burst fracture of T5-T6 vertebra, initial encounter for closed fracture                |  |  |
| S22.051B | Stable burst fracture of T5-T6 vertebra, initial encounter for open fracture                  |  |  |
| S22.052A | Unstable burst fracture of T5-T6 vertebra, initial encounter for closed fracture              |  |  |
| S22.052B | Unstable burst fracture of T5-T6 vertebra, initial encounter for open fracture                |  |  |



|          |                                                                                      |  |  |
|----------|--------------------------------------------------------------------------------------|--|--|
| S22.058A | Other fracture of T5-T6 vertebra, initial encounter for closed fracture              |  |  |
| S22.058B | Other fracture of T5-T6 vertebra, initial encounter for open fracture                |  |  |
| S22.059A | Unspecified fracture of T5-T6 vertebra, initial encounter for closed fracture        |  |  |
| S22.059B | Unspecified fracture of T5-T6 vertebra, initial encounter for open fracture          |  |  |
| S22.060A | Wedge compression fracture of T7-T8 vertebra, initial encounter for closed fracture  |  |  |
| S22.060B | Wedge compression fracture of T7-T8 vertebra, initial encounter for open fracture    |  |  |
| S22.061A | Stable burst fracture of T7-T8 vertebra, initial encounter for closed fracture       |  |  |
| S22.061B | Stable burst fracture of T7-T8 vertebra, initial encounter for open fracture         |  |  |
| S22.062A | Unstable burst fracture of T7-T8 vertebra, initial encounter for closed fracture     |  |  |
| S22.062B | Unstable burst fracture of T7-T8 vertebra, initial encounter for open fracture       |  |  |
| S22.068A | Other fracture of T7-T8 thoracic vertebra, initial encounter for closed fracture     |  |  |
| S22.068B | Other fracture of T7-T8 thoracic vertebra, initial encounter for open fracture       |  |  |
| S22.069A | Unspecified fracture of T7-T8 vertebra, initial encounter for closed fracture        |  |  |
| S22.069B | Unspecified fracture of T7-T8 vertebra, initial encounter for open fracture          |  |  |
| S22.070A | Wedge compression fracture of T9-T10 vertebra, initial encounter for closed fracture |  |  |
| S22.070B | Wedge compression fracture of T9-T10 vertebra, initial encounter for open fracture   |  |  |
| S22.071A | Stable burst fracture of T9-T10 vertebra, initial encounter for closed fracture      |  |  |
| S22.071B | Stable burst fracture of T9-T10 vertebra, initial encounter for open fracture        |  |  |
| S22.072A | Unstable burst fracture of T9-T10 vertebra, initial encounter for closed fracture    |  |  |

|          |                                                                                       |  |  |
|----------|---------------------------------------------------------------------------------------|--|--|
| S22.072B | Unstable burst fracture of T9-T10 vertebra, initial encounter for open fracture       |  |  |
| S22.078A | Other fracture of T9-T10 vertebra, initial encounter for closed fracture              |  |  |
| S22.078B | Other fracture of T9-T10 vertebra, initial encounter for open fracture                |  |  |
| S22.079A | Unspecified fracture of T9-T10 vertebra, initial encounter for closed fracture        |  |  |
| S22.079B | Unspecified fracture of T9-T10 vertebra, initial encounter for open fracture          |  |  |
| S22.080A | Wedge compression fracture of T11-T12 vertebra, initial encounter for closed fracture |  |  |
| S22.080B | Wedge compression fracture of T11-T12 vertebra, initial encounter for open fracture   |  |  |
| S22.081A | Stable burst fracture of T11-T12 vertebra, initial encounter for closed fracture      |  |  |
| S22.081B | Stable burst fracture of T11-T12 vertebra, initial encounter for open fracture        |  |  |
| S22.082A | Unstable burst fracture of T11-T12 vertebra, initial encounter for closed fracture    |  |  |
| S22.082B | Unstable burst fracture of T11-T12 vertebra, initial encounter for open fracture      |  |  |
| S22.088A | Other fracture of T11-T12 vertebra, initial encounter for closed fracture             |  |  |
| S22.088B | Other fracture of T11-T12 vertebra, initial encounter for open fracture               |  |  |
| S22.089A | Unspecified fracture of T11-T12 vertebra, initial encounter for closed fracture       |  |  |
| S22.089B | Unspecified fracture of T11-T12 vertebra, initial encounter for open fracture         |  |  |
| S22.20XA | Unspecified fracture of sternum, initial encounter for closed fracture                |  |  |
| S22.20XB | Unspecified fracture of sternum, initial encounter for open fracture                  |  |  |
| S22.21XA | Fracture of manubrium, initial encounter for closed fracture                          |  |  |
| S22.21XB | Fracture of manubrium, initial encounter for open fracture                            |  |  |
| S22.22XA | Fracture of body of sternum, initial encounter for closed fracture                    |  |  |

|          |                                                                                     |  |  |
|----------|-------------------------------------------------------------------------------------|--|--|
| S22.22XB | Fracture of body of sternum, initial encounter for open fracture                    |  |  |
| S22.23XA | Sternal manubrial dissociation, initial encounter for closed fracture               |  |  |
| S22.23XB | Sternal manubrial dissociation, initial encounter for open fracture                 |  |  |
| S22.24XA | Fracture of xiphoid process, initial encounter for closed fracture                  |  |  |
| S22.24XB | Fracture of xiphoid process, initial encounter for open fracture                    |  |  |
| S22.41XA | Multiple fractures of ribs, right side, initial encounter for closed fracture       |  |  |
| S22.41XB | Multiple fractures of ribs, right side, initial encounter for open fracture         |  |  |
| S22.42XA | Multiple fractures of ribs, left side, initial encounter for closed fracture        |  |  |
| S22.42XB | Multiple fractures of ribs, left side, initial encounter for open fracture          |  |  |
| S22.43XA | Multiple fractures of ribs, bilateral, initial encounter for closed fracture        |  |  |
| S22.43XB | Multiple fractures of ribs, bilateral, initial encounter for open fracture          |  |  |
| S22.49XA | Multiple fractures of ribs, unspecified side, initial encounter for closed fracture |  |  |
| S22.49XB | Multiple fractures of ribs, unspecified side, initial encounter for open fracture   |  |  |
| S22.5XXA | Flail chest, initial encounter for closed fracture                                  |  |  |
| S22.5XXB | Flail chest, initial encounter for open fracture                                    |  |  |
| S22.9XXA | Fracture of bony thorax, part unspecified, initial encounter for closed fracture    |  |  |
| S22.9XXB | Fracture of bony thorax, part unspecified, initial encounter for open fracture      |  |  |
| S24.0XXA | Concussion and edema of thoracic spinal cord, initial encounter                     |  |  |
| S24.101A | Unspecified injury at T1 level of thoracic spinal cord, initial encounter           |  |  |
| S24.102A | Unspecified injury at T2-T6 level of thoracic spinal cord, initial encounter        |  |  |

|          |                                                                                        |  |  |
|----------|----------------------------------------------------------------------------------------|--|--|
| S24.103A | Unspecified injury at T7-T10 level of thoracic spinal cord, initial encounter          |  |  |
| S24.104A | Unspecified injury at T11-T12 level of thoracic spinal cord, initial encounter         |  |  |
| S24.109A | Unspecified injury at unspecified level of thoracic spinal cord, initial encounter     |  |  |
| S24.111A | Complete lesion at T1 level of thoracic spinal cord, initial encounter                 |  |  |
| S24.112A | Complete lesion at T2-T6 level of thoracic spinal cord, initial encounter              |  |  |
| S24.113A | Complete lesion at T7-T10 level of thoracic spinal cord, initial encounter             |  |  |
| S24.114A | Complete lesion at T11-T12 level of thoracic spinal cord, initial encounter            |  |  |
| S24.119A | Complete lesion at unspecified level of thoracic spinal cord, initial encounter        |  |  |
| S24.131A | Anterior cord syndrome at T1 level of thoracic spinal cord, initial encounter          |  |  |
| S24.132A | Anterior cord syndrome at T2-T6 level of thoracic spinal cord, initial encounter       |  |  |
| S24.133A | Anterior cord syndrome at T7-T10 level of thoracic spinal cord, initial encounter      |  |  |
| S24.134A | Anterior cord syndrome at T11-T12 level of thoracic spinal cord, initial encounter     |  |  |
| S24.139A | Anterior cord syndrome at unspecified level of thoracic spinal cord, initial encounter |  |  |
| S24.141A | Brown-Sequard syndrome at T1 level of thoracic spinal cord, initial encounter          |  |  |
| S24.142A | Brown-Sequard syndrome at T2-T6 level of thoracic spinal cord, initial encounter       |  |  |
| S24.143A | Brown-Sequard syndrome at T7-T10 level of thoracic spinal cord, initial encounter      |  |  |
| S24.144A | Brown-Sequard syndrome at T11-T12 level of thoracic spinal cord, initial encounter     |  |  |
| S24.149A | Brown-Sequard syndrome at unspecified level of thoracic spinal cord, initial encounter |  |  |
| S24.151A | Other incomplete lesion at T1 level of thoracic spinal cord, initial encounter         |  |  |

|          |                                                                                         |  |  |
|----------|-----------------------------------------------------------------------------------------|--|--|
| S24.152A | Other incomplete lesion at T2-T6 level of thoracic spinal cord, initial encounter       |  |  |
| S24.153A | Other incomplete lesion at T7-T10 level of thoracic spinal cord, initial encounter      |  |  |
| S24.154A | Other incomplete lesion at T11-T12 level of thoracic spinal cord, initial encounter     |  |  |
| S24.159A | Other incomplete lesion at unspecified level of thoracic spinal cord, initial encounter |  |  |
| S24.2XXA | Injury of nerve root of thoracic spine, initial encounter                               |  |  |
| S24.3XXA | Injury of peripheral nerves of thorax, initial encounter                                |  |  |
| S24.4XXA | Injury of thoracic sympathetic nervous system, initial encounter                        |  |  |
| S24.8XXA | Injury of other specified nerves of thorax, initial encounter                           |  |  |
| S24.9XXA | Injury of unspecified nerve of thorax, initial encounter                                |  |  |
| S25.00XA | Unspecified injury of thoracic aorta, initial encounter                                 |  |  |
| S25.01XA | Minor laceration of thoracic aorta, initial encounter                                   |  |  |
| S25.02XA | Major laceration of thoracic aorta, initial encounter                                   |  |  |
| S25.09XA | Other specified injury of thoracic aorta, initial encounter                             |  |  |
| S25.101A | Unspecified injury of right innominate or subclavian artery, initial encounter          |  |  |
| S25.102A | Unspecified injury of left innominate or subclavian artery, initial encounter           |  |  |
| S25.109A | Unspecified injury of unspecified innominate or subclavian artery, initial encounter    |  |  |
| S25.111A | Minor laceration of right innominate or subclavian artery, initial encounter            |  |  |
| S25.112A | Minor laceration of left innominate or subclavian artery, initial encounter             |  |  |
| S25.119A | Minor laceration of unspecified innominate or subclavian artery, initial encounter      |  |  |
| S25.121A | Major laceration of right innominate or subclavian artery, initial encounter            |  |  |
| S25.122A | Major laceration of left innominate or subclavian artery, initial encounter             |  |  |
| S25.129A | Major laceration of unspecified innominate or subclavian artery, initial encounter      |  |  |
| S25.191A | Other specified injury of right innominate or subclavian artery, initial encounter      |  |  |

|          |                                                                                          |  |  |
|----------|------------------------------------------------------------------------------------------|--|--|
| S25.192A | Other specified injury of left innominate or subclavian artery, initial encounter        |  |  |
| S25.199A | Other specified injury of unspecified innominate or subclavian artery, initial encounter |  |  |
| S25.20XA | Unspecified injury of superior vena cava, initial encounter                              |  |  |
| S25.21XA | Minor laceration of superior vena cava, initial encounter                                |  |  |
| S25.22XA | Major laceration of superior vena cava, initial encounter                                |  |  |
| S25.29XA | Other specified injury of superior vena cava, initial encounter                          |  |  |
| S25.301A | Unspecified injury of right innominate or subclavian vein, initial encounter             |  |  |
| S25.302A | Unspecified injury of left innominate or subclavian vein, initial encounter              |  |  |
| S25.309A | Unspecified injury of unspecified innominate or subclavian vein, initial encounter       |  |  |
| S25.311A | Minor laceration of right innominate or subclavian vein, initial encounter               |  |  |
| S25.312A | Minor laceration of left innominate or subclavian vein, initial encounter                |  |  |
| S25.319A | Minor laceration of unspecified innominate or subclavian vein, initial encounter         |  |  |
| S25.321A | Major laceration of right innominate or subclavian vein, initial encounter               |  |  |
| S25.322A | Major laceration of left innominate or subclavian vein, initial encounter                |  |  |
| S25.329A | Major laceration of unspecified innominate or subclavian vein, initial encounter         |  |  |
| S25.391A | Other specified injury of right innominate or subclavian vein, initial encounter         |  |  |
| S25.392A | Other specified injury of left innominate or subclavian vein, initial encounter          |  |  |
| S25.399A | Other specified injury of unspecified innominate or subclavian vein, initial encounter   |  |  |
| S25.401A | Unspecified injury of right pulmonary blood vessels, initial encounter                   |  |  |
| S25.402A | Unspecified injury of left pulmonary blood vessels, initial encounter                    |  |  |
| S25.409A | Unspecified injury of unspecified pulmonary blood vessels, initial encounter             |  |  |

|          |                                                                                          |  |  |
|----------|------------------------------------------------------------------------------------------|--|--|
| S25.411A | Minor laceration of right pulmonary blood vessels, initial encounter                     |  |  |
| S25.412A | Minor laceration of left pulmonary blood vessels, initial encounter                      |  |  |
| S25.419A | Minor laceration of unspecified pulmonary blood vessels, initial encounter               |  |  |
| S25.421A | Major laceration of right pulmonary blood vessels, initial encounter                     |  |  |
| S25.422A | Major laceration of left pulmonary blood vessels, initial encounter                      |  |  |
| S25.429A | Major laceration of unspecified pulmonary blood vessels, initial encounter               |  |  |
| S25.491A | Other specified injury of right pulmonary blood vessels, initial encounter               |  |  |
| S25.492A | Other specified injury of left pulmonary blood vessels, initial encounter                |  |  |
| S25.499A | Other specified injury of unspecified pulmonary blood vessels, initial encounter         |  |  |
| S25.501A | Unspecified injury of intercostal blood vessels, right side, initial encounter           |  |  |
| S25.502A | Unspecified injury of intercostal blood vessels, left side, initial encounter            |  |  |
| S25.509A | Unspecified injury of intercostal blood vessels, unspecified side, initial encounter     |  |  |
| S25.511A | Laceration of intercostal blood vessels, right side, initial encounter                   |  |  |
| S25.512A | Laceration of intercostal blood vessels, left side, initial encounter                    |  |  |
| S25.519A | Laceration of intercostal blood vessels, unspecified side, initial encounter             |  |  |
| S25.591A | Other specified injury of intercostal blood vessels, right side, initial encounter       |  |  |
| S25.592A | Other specified injury of intercostal blood vessels, left side, initial encounter        |  |  |
| S25.599A | Other specified injury of intercostal blood vessels, unspecified side, initial encounter |  |  |
| S25.801A | Unspecified injury of other blood vessels of thorax, right side, initial encounter       |  |  |

|          |                                                                                              |  |  |
|----------|----------------------------------------------------------------------------------------------|--|--|
| S25.802A | Unspecified injury of other blood vessels of thorax, left side, initial encounter            |  |  |
| S25.809A | Unspecified injury of other blood vessels of thorax, unspecified side, initial encounter     |  |  |
| S25.811A | Laceration of other blood vessels of thorax, right side, initial encounter                   |  |  |
| S25.812A | Laceration of other blood vessels of thorax, left side, initial encounter                    |  |  |
| S25.819A | Laceration of other blood vessels of thorax, unspecified side, initial encounter             |  |  |
| S25.891A | Other specified injury of other blood vessels of thorax, right side, initial encounter       |  |  |
| S25.892A | Other specified injury of other blood vessels of thorax, left side, initial encounter        |  |  |
| S25.899A | Other specified injury of other blood vessels of thorax, unspecified side, initial encounter |  |  |
| S25.90XA | Unspecified injury of unspecified blood vessel of thorax, initial encounter                  |  |  |
| S25.91XA | Laceration of unspecified blood vessel of thorax, initial encounter                          |  |  |
| S25.99XA | Other specified injury of unspecified blood vessel of thorax, initial encounter              |  |  |
| S26.00XA | Unspecified injury of heart with hemopericardium, initial encounter                          |  |  |
| S26.01XA | Contusion of heart with hemopericardium, initial encounter                                   |  |  |
| S26.020A | Mild laceration of heart with hemopericardium, initial encounter                             |  |  |
| S26.021A | Moderate laceration of heart with hemopericardium, initial encounter                         |  |  |
| S26.022A | Major laceration of heart with hemopericardium, initial encounter                            |  |  |
| S26.09XA | Other injury of heart with hemopericardium, initial encounter                                |  |  |
| S26.10XA | Unspecified injury of heart without hemopericardium, initial encounter                       |  |  |
| S26.11XA | Contusion of heart without hemopericardium, initial encounter                                |  |  |



|          |                                                                                             |  |  |
|----------|---------------------------------------------------------------------------------------------|--|--|
| S26.12XA | Laceration of heart without hemopericardium, initial encounter                              |  |  |
| S26.19XA | Other injury of heart without hemopericardium, initial encounter                            |  |  |
| S26.90XA | Unspecified injury of heart, unspecified with or without hemopericardium, initial encounter |  |  |
| S26.91XA | Contusion of heart, unspecified with or without hemopericardium, initial encounter          |  |  |
| S26.92XA | Laceration of heart, unspecified with or without hemopericardium, initial encounter         |  |  |
| S26.99XA | Other injury of heart, unspecified with or without hemopericardium, initial encounter       |  |  |
| S27.0XXA | Traumatic pneumothorax, initial encounter                                                   |  |  |
| S27.1XXA | Traumatic hemothorax, initial encounter                                                     |  |  |
| S27.2XXA | Traumatic hemopneumothorax, initial encounter                                               |  |  |
| S27.301A | Unspecified injury of lung, unilateral, initial encounter                                   |  |  |
| S27.302A | Unspecified injury of lung, bilateral, initial encounter                                    |  |  |
| S27.309A | Unspecified injury of lung, unspecified, initial encounter                                  |  |  |
| S27.311A | Primary blast injury of lung, unilateral, initial encounter                                 |  |  |
| S27.312A | Primary blast injury of lung, bilateral, initial encounter                                  |  |  |
| S27.319A | Primary blast injury of lung, unspecified, initial encounter                                |  |  |
| S27.321A | Contusion of lung, unilateral, initial encounter                                            |  |  |
| S27.322A | Contusion of lung, bilateral, initial encounter                                             |  |  |
| S27.329A | Contusion of lung, unspecified, initial encounter                                           |  |  |
| S27.331A | Laceration of lung, unilateral, initial encounter                                           |  |  |
| S27.332A | Laceration of lung, bilateral, initial encounter                                            |  |  |
| S27.339A | Laceration of lung, unspecified, initial encounter                                          |  |  |
| S27.391A | Other injuries of lung, unilateral, initial encounter                                       |  |  |
| S27.392A | Other injuries of lung, bilateral, initial encounter                                        |  |  |
| S27.399A | Other injuries of lung, unspecified, initial encounter                                      |  |  |
| S27.401A | Unspecified injury of bronchus, unilateral, initial encounter                               |  |  |
| S27.402A | Unspecified injury of bronchus, bilateral, initial encounter                                |  |  |
| S27.409A | Unspecified injury of bronchus, unspecified, initial encounter                              |  |  |
| S27.411A | Primary blast injury of bronchus, unilateral, initial encounter                             |  |  |

|          |                                                                       |  |  |
|----------|-----------------------------------------------------------------------|--|--|
| S27.412A | Primary blast injury of bronchus, bilateral, initial encounter        |  |  |
| S27.419A | Primary blast injury of bronchus, unspecified, initial encounter      |  |  |
| S27.421A | Contusion of bronchus, unilateral, initial encounter                  |  |  |
| S27.422A | Contusion of bronchus, bilateral, initial encounter                   |  |  |
| S27.429A | Contusion of bronchus, unspecified, initial encounter                 |  |  |
| S27.431A | Laceration of bronchus, unilateral, initial encounter                 |  |  |
| S27.432A | Laceration of bronchus, bilateral, initial encounter                  |  |  |
| S27.439A | Laceration of bronchus, unspecified, initial encounter                |  |  |
| S27.491A | Other injury of bronchus, unilateral, initial encounter               |  |  |
| S27.492A | Other injury of bronchus, bilateral, initial encounter                |  |  |
| S27.499A | Other injury of bronchus, unspecified, initial encounter              |  |  |
| S27.50XA | Unspecified injury of thoracic trachea, initial encounter             |  |  |
| S27.51XA | Primary blast injury of thoracic trachea, initial encounter           |  |  |
| S27.52XA | Contusion of thoracic trachea, initial encounter                      |  |  |
| S27.53XA | Laceration of thoracic trachea, initial encounter                     |  |  |
| S27.59XA | Other injury of thoracic trachea, initial encounter                   |  |  |
| S27.60XA | Unspecified injury of pleura, initial encounter                       |  |  |
| S27.63XA | Laceration of pleura, initial encounter                               |  |  |
| S27.69XA | Other injury of pleura, initial encounter                             |  |  |
| S27.802A | Contusion of diaphragm, initial encounter                             |  |  |
| S27.803A | Laceration of diaphragm, initial encounter                            |  |  |
| S27.808A | Other injury of diaphragm, initial encounter                          |  |  |
| S27.809A | Unspecified injury of diaphragm, initial encounter                    |  |  |
| S27.812A | Contusion of esophagus (thoracic part), initial encounter             |  |  |
| S27.813A | Laceration of esophagus (thoracic part), initial encounter            |  |  |
| S27.818A | Other injury of esophagus (thoracic part), initial encounter          |  |  |
| S27.819A | Unspecified injury of esophagus (thoracic part), initial encounter    |  |  |
| S27.892A | Contusion of other specified intrathoracic organs, initial encounter  |  |  |
| S27.893A | Laceration of other specified intrathoracic organs, initial encounter |  |  |

|          |                                                                                          |  |  |
|----------|------------------------------------------------------------------------------------------|--|--|
| S27.898A | Other injury of other specified intrathoracic organs, initial encounter                  |  |  |
| S27.899A | Unspecified injury of other specified intrathoracic organs, initial encounter            |  |  |
| S27.9XXA | Injury of unspecified intrathoracic organ, initial encounter                             |  |  |
| S28.0XXA | Crushed chest, initial encounter                                                         |  |  |
| S28.1XXA | Traumatic amputation (partial) of part of thorax, except breast, initial encounter       |  |  |
| S28.211A | Complete traumatic amputation of right breast, initial encounter                         |  |  |
| S28.212A | Complete traumatic amputation of left breast, initial encounter                          |  |  |
| S28.219A | Complete traumatic amputation of unspecified breast, initial encounter                   |  |  |
| S28.221A | Partial traumatic amputation of right breast, initial encounter                          |  |  |
| S28.222A | Partial traumatic amputation of left breast, initial encounter                           |  |  |
| S28.229A | Partial traumatic amputation of unspecified breast, initial encounter                    |  |  |
| S29.001A | Unspecified injury of muscle and tendon of front wall of thorax, initial encounter       |  |  |
| S29.002A | Unspecified injury of muscle and tendon of back wall of thorax, initial encounter        |  |  |
| S29.009A | Unspecified injury of muscle and tendon of unspecified wall of thorax, initial encounter |  |  |
| S29.021A | Laceration of muscle and tendon of front wall of thorax, initial encounter               |  |  |
| S29.022A | Laceration of muscle and tendon of back wall of thorax, initial encounter                |  |  |
| S29.029A | Laceration of muscle and tendon of unspecified wall of thorax, initial encounter         |  |  |
| S29.091A | Other injury of muscle and tendon of front wall of thorax, initial encounter             |  |  |
| S29.092A | Other injury of muscle and tendon of back wall of thorax, initial encounter              |  |  |
| S29.099A | Other injury of muscle and tendon of unspecified wall of thorax, initial encounter       |  |  |
| S29.8XXA | Other specified injuries of thorax, initial encounter                                    |  |  |

|          |                                                 |  |  |
|----------|-------------------------------------------------|--|--|
| S29.9XXA | Unspecified injury of thorax, initial encounter |  |  |
|----------|-------------------------------------------------|--|--|

**Included and Excluded ICD-10-CM Diagnosis Subcodes for Volume Depletion Condition Group**

| Included ICD-10-CM diagnosis subcodes (n=3) |                               | Excluded ICD-10-CM diagnosis subcodes (n=0) |                     |
|---------------------------------------------|-------------------------------|---------------------------------------------|---------------------|
| Subcode                                     | Subcode description           | Subcode                                     | Subcode description |
| E86.0                                       | Dehydration                   |                                             |                     |
| E86.1                                       | Hypovolemia                   |                                             |                     |
| E86.9                                       | Volume depletion, unspecified |                                             |                     |

**eTable 1.** Characteristics of the Panelists

| <b>Characteristic</b>                        | <b>Panelists<br/>(n=8)</b> |
|----------------------------------------------|----------------------------|
| Male, n (%)                                  | 5 (63)                     |
| Years since last training program, mean (SD) | 15.8 (9.3)                 |
| Expertise                                    |                            |
| Primary Care                                 | 1                          |
| Hospitalist                                  | 4                          |
| Emergency Medicine                           | 3                          |
| Practice location by US Census region        |                            |
| Northeast                                    | 1                          |
| South                                        | 1                          |
| Midwest                                      | 2                          |
| West                                         | 4                          |
| Nominating professional association          |                            |
| ACEP                                         | 1                          |
| SGIM                                         | 3                          |
| SHM                                          | 2                          |

Abbreviations: ACEP, American College of Emergency Physicians; SGIM, Society of General Internal Medicine; SHM, Society of Hospital Medicine

**eTable 2.** Most Common Conditions Among Non-ECSC Visits, 2016

|                                                                     | <b>Non-ECSC ED visits<br/>N= 98,289,685<sup>a</sup></b> |
|---------------------------------------------------------------------|---------------------------------------------------------|
| <b>CCS category name</b>                                            | <b>n (%)</b>                                            |
| 251 Abdominal pain                                                  | 5,255,926 (5.3)                                         |
| 102 Nonspecific chest pain                                          | 5,082,227 (5.2)                                         |
| 232 Sprains and strains                                             | 4,376,179 (4.5)                                         |
| 205 Spondylosis; intervertebral disc disorders; other back problems | 4,203,711 (4.3)                                         |
| 239 Superficial injury; contusion                                   | 3,928,481 (4.0)                                         |
| 159 Urinary tract infections                                        | 3,238,549 (3.3)                                         |
| 126 Other upper respiratory infections                              | 2,953,253 (3.0)                                         |
| 84 Headache; including migraine                                     | 2,892,901 (2.9)                                         |
| 197 Skin and subcutaneous tissue infections                         | 2,856,414 (2.9)                                         |
| 236 Open wounds of extremities                                      | 2,521,996 (2.6)                                         |
| 211 Other connective tissue disease                                 | 2,331,981 (2.4)                                         |
| 244 Other injuries and conditions due to external causes            | 2,045,524 (2.1)                                         |
| 204 Other non-traumatic joint disorders                             | 2,030,368 (2.1)                                         |
| 181 Other complications of pregnancy                                | 1,943,594 (2.0)                                         |
| 136 Disorders of teeth and jaw                                      | 1,773,408 (1.8)                                         |
| 133 Other lower respiratory disease                                 | 1,498,586 (1.5)                                         |
| 95 Other nervous system disorders                                   | 1,422,926 (1.4)                                         |
| 250 Nausea and vomiting                                             | 1,410,090 (1.4)                                         |
| 155 Other gastrointestinal disorders                                | 1,379,411 (1.4)                                         |
| 660 Alcohol-related disorders                                       | 1,307,836 (1.3)                                         |
| 93 Conditions associated with dizziness or vertigo                  | 1,274,965 (1.3)                                         |
| 259 Residual codes; unclassified                                    | 1,197,021 (1.2)                                         |
| 229 Fracture of upper limb                                          | 1,155,798 (1.2)                                         |
| 235 Open wounds of head; neck; and trunk                            | 1,147,195 (1.2)                                         |
| 245 Syncope                                                         | 1,127,832 (1.1)                                         |
| 125 Acute bronchitis                                                | 1,017,299 (1.0)                                         |
| 253 Allergic reactions                                              | 1,010,908 (1.0)                                         |
| 651 Anxiety disorders                                               | 998,806 (1.0)                                           |
| 98 Essential hypertension                                           | 955,243 (1.0)                                           |
| 160 Calculus of urinary tract                                       | 954,898 (1.0)                                           |
| 657 Mood disorders                                                  | 950,667 (1.0)                                           |
| 154 Noninfectious gastroenteritis                                   | 918,891 (0.9)                                           |
| 83 Epilepsy; convulsions                                            | 854,479 (0.9)                                           |
| 230 Fracture of lower limb                                          | 812,726 (0.8)                                           |
| 163 Genitourinary symptoms and ill-defined conditions               | 807,672 (0.8)                                           |
| 7 Viral infection                                                   | 791,951 (0.8)                                           |
| 200 Other skin disorders                                            | 777,434 (0.8)                                           |

|                                                                                                        |               |
|--------------------------------------------------------------------------------------------------------|---------------|
| 106 Cardiac dysrhythmias                                                                               | 732,876 (0.7) |
| 127 Chronic obstructive pulmonary disease and bronchiectasis                                           | 697,562 (0.7) |
| 149 Biliary tract disease                                                                              | 669,777 (0.7) |
| 661 Substance-related disorders                                                                        | 659,807 (0.7) |
| 134 Other upper respiratory disease                                                                    | 644,894 (0.7) |
| 182 Hemorrhage during pregnancy; abruptio placenta; placenta previa                                    | 644,615 (0.7) |
| 252 Malaise and fatigue                                                                                | 597,221 (0.6) |
| 659 Schizophrenia and other psychotic disorders                                                        | 574,624 (0.6) |
| 146 Diverticulosis and diverticulitis                                                                  | 550,902 (0.6) |
| 99 Hypertension with complications and secondary hypertension                                          | 540,923 (0.6) |
| 157 Acute and unspecified renal failure                                                                | 528,804 (0.5) |
| 90 Inflammation; infection of eye (except that caused by tuberculosis or sexually transmitted disease) | 527,184 (0.5) |
| 175 Other female genital disorders                                                                     | 518,139 (0.5) |

<sup>a</sup>The table lists only the top 50 most common CCS categories for the non-ECSC visits. 19,153,714 (19.5%) non-ECSC visits were classified to CCS categories that are not listed. 41,500 (0.0%) non-ECSC visits were missing a CCS category.
